# Supplementary material for: Synthesis and anticancer studies of Michael adducts and Heck arylation products of sesquiterpene lactones, zaluzanin D and zaluzanin C from Vernonia arborea
Source: Royal Society of Chemistry journal article supplement (doi:10.1039/c8ra06238b), 2018-01-01

## Supporting Information

### **Synthesis and anticancer studies of Michael adducts and Heck arylation products of sesquiterpene lactones, zaluzanin D and zaluzanin C from *Vernonia arborea***

Tushar R. Valkute,<sup>a</sup> Eswar K. Aratikatla,<sup>ab</sup> Neha A. Gupta,<sup>c</sup> S. Ganga,<sup>c</sup> Manas K. Santra,<sup>\*c</sup> and Asish K. Bhattacharya<sup>\*ab</sup>

<sup>a</sup>*Division of Organic Chemistry, CSIR-National Chemical Laboratory (CSIR-NCL), Dr. Homi Bhabha Road, Pune-41108, India.*

<sup>b</sup>*Division of Organic Chemistry, Academy of Scientific and Innovative Research (AcSIR), India.*

<sup>c</sup>*Biology of Cancer and Chronic Diseases, National Centre for Cell Sciences, Ganeshkhind Road, Pune-411 007, India.*

## Table of Contents

Copies of NMR and HRMS spectra of Michael adducts of zaluzanin D.....S2-S56

Copies of NMR and HRMS spectra of Heck analogs of zaluzanin D.....S56-S83

### Experimental Section

**General.** All melting points were recorded on a Büchi melting point apparatus in open capillaries and are uncorrected. Commercially available reagents and solvents were used as such received. Dry MeOH was prepared following the standard procedures. All dry reactions were carried out under argon atmosphere and flash chromatography was performed with CombiFlash *Rf* 200*i* with UV/VIS and ELSD, Isco Teledyne Inc., USA using RediSep® column (SiO<sub>2</sub>). <sup>1</sup>H NMR spectra were recorded on 400 or 200 MHz spectrometer and <sup>13</sup>C NMR spectra were recorded at 100 or 50 MHz. Chemical shifts are reported as  $\delta$  values (ppm) relative to internal standard tetramethylsilane in CDCl<sub>3</sub>. HRMS (ESI) were recorded on an Orbitrap (quadrupole plus ion trap) and TOF mass analyser. FT-IR spectra were recorded on an FT-IR-8300 Shimadzu spectrometer. Optical rotations were recorded on a JASCO P-1020 polarimeter.

**<sup>1</sup>H NMR of Compound 1 (200 MHz, CDCl<sub>3</sub>)**

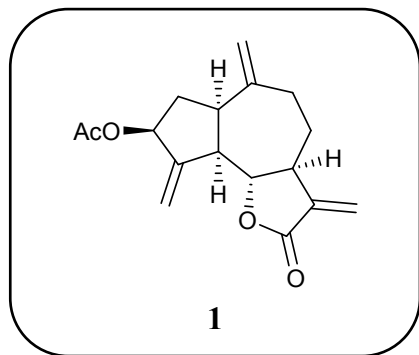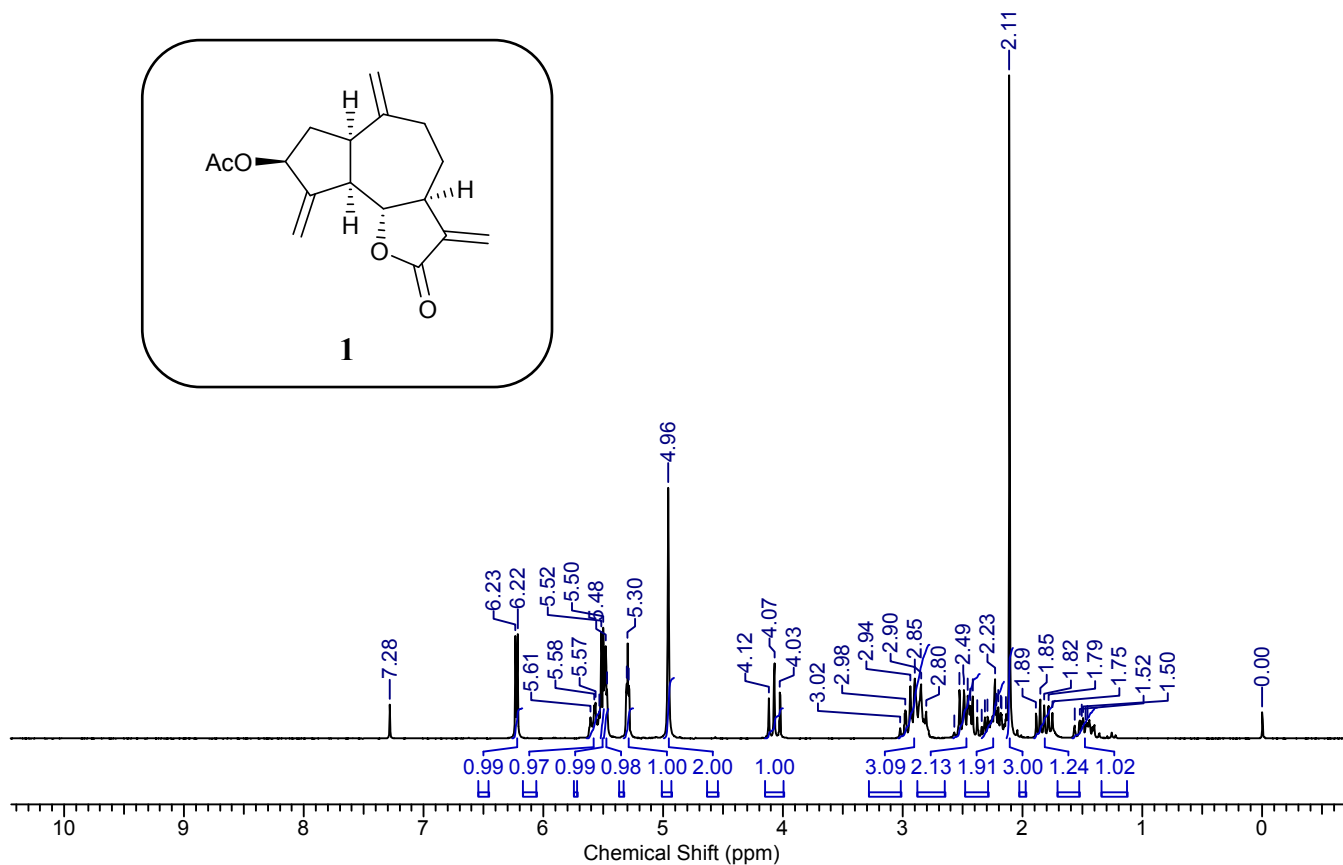

**<sup>13</sup>C NMR of Compound 1 (50 MHz, CDCl<sub>3</sub>)**

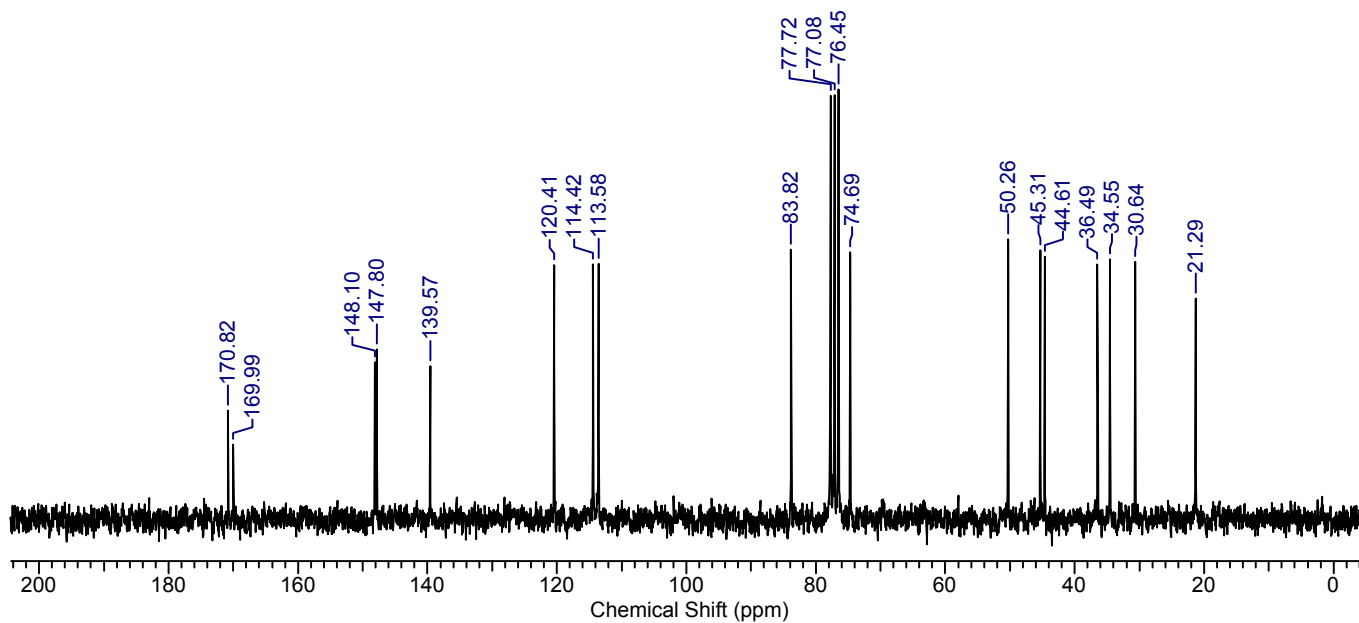

### DEPT of Compound 1 (50 MHz, CDCl<sub>3</sub>)

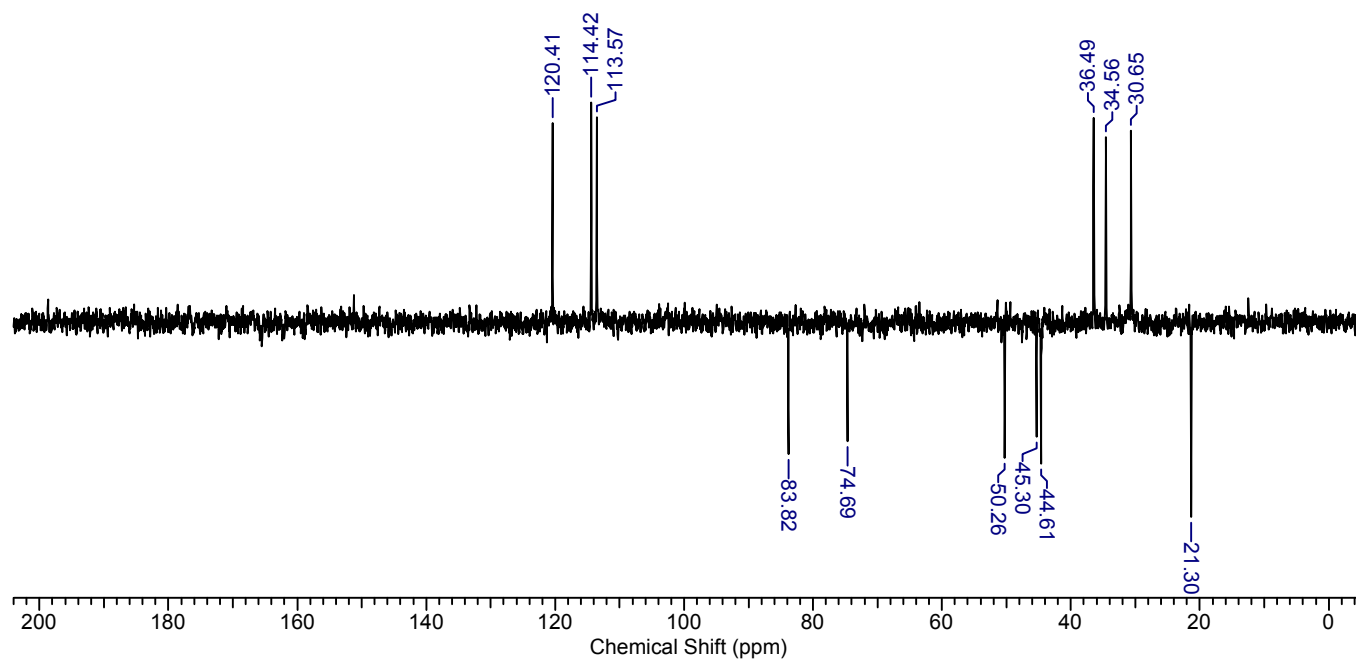

### LC-MS of Compound 1

F:\DATA\Sept-2014\19\ZD\_140919162231

9/19/2014 4:22:31 PM

ZD\_140919162231 #9-15 RT: 0.14-0.25 AV: 7 SB: 37 0.37-0.88, 0.02-0.12 NL: 3.01E5  
T: (0.0) + c ESI corona sid=40.00 det=1600.00 Full ms [ 100.00-1500.00]

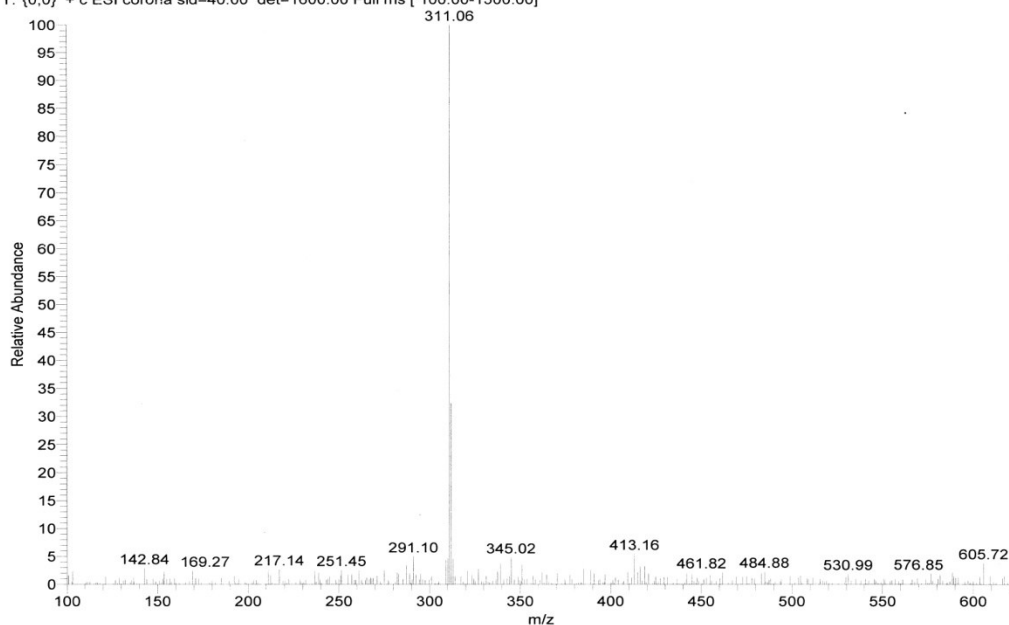

# HR-MS of Compound 1

ISD #109 RT: 0.46 AV: 1 NL: 1027  
T: FTMS + p ESI Full ms [100.00-1500.00]

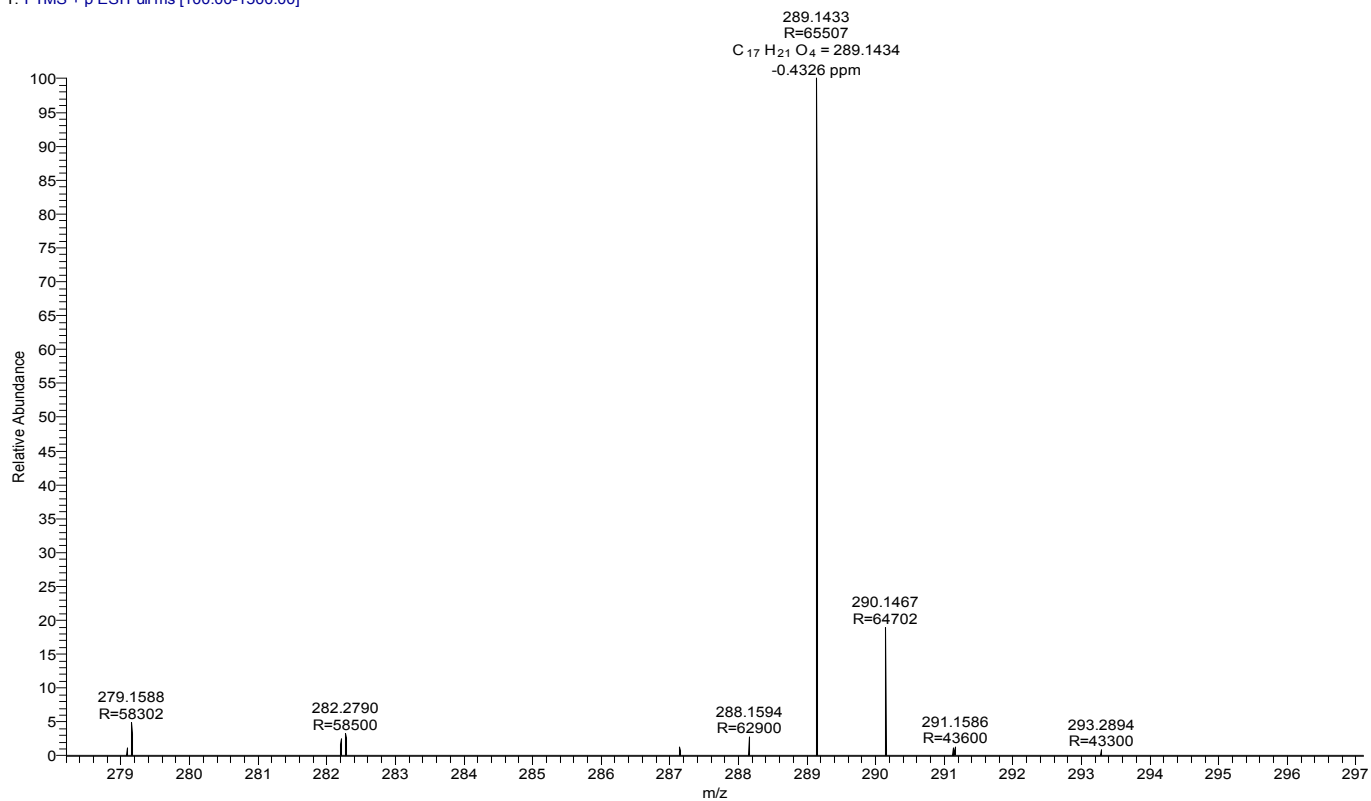

# <sup>1</sup>H NMR of Compound 2 (400 MHz, CDCl<sub>3</sub>)

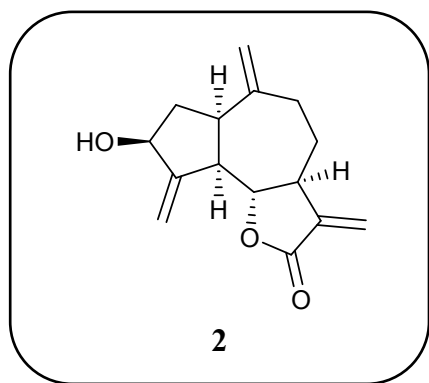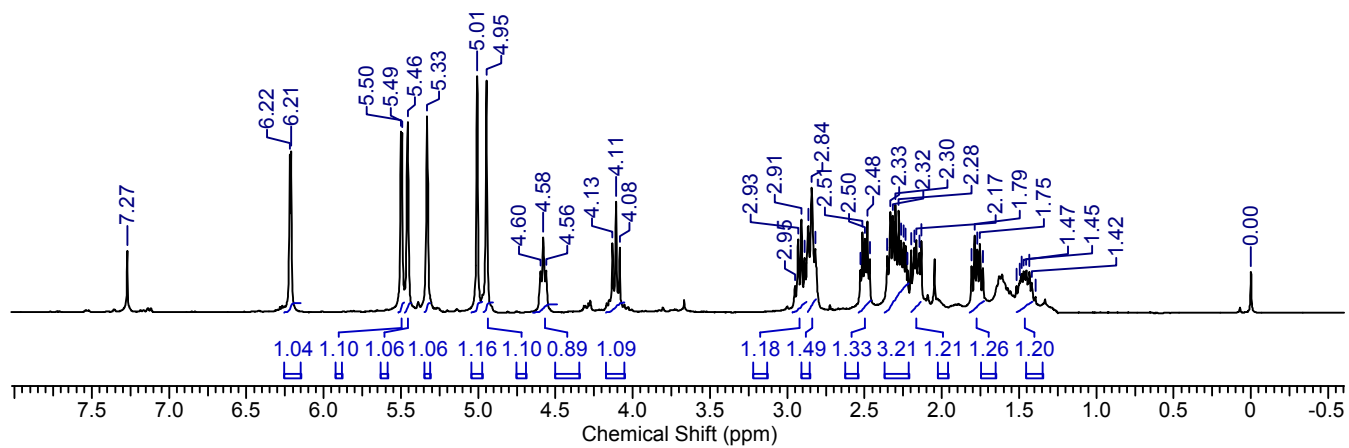

**$^{13}\text{C}$  NMR of Compound 2 (100 MHz,  $\text{CDCl}_3$ )**

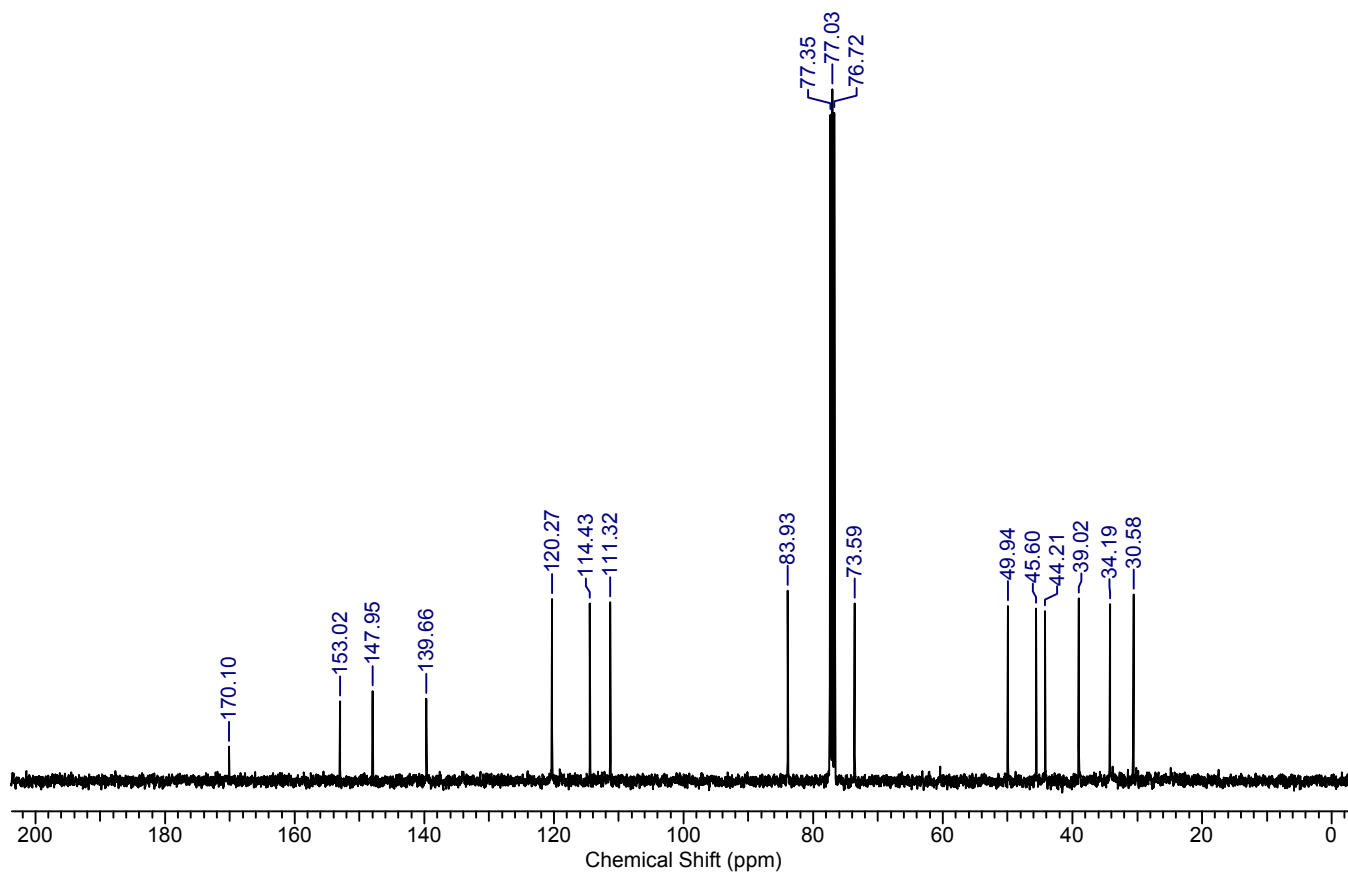

**DEPT of Compound 2 (100 MHz,  $\text{CDCl}_3$ )**

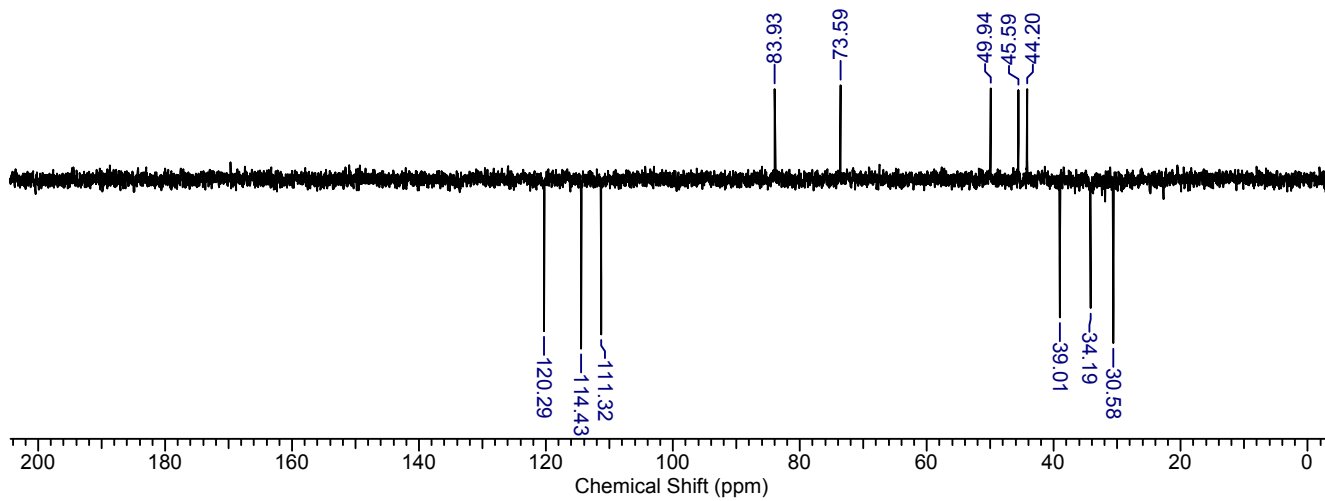

# HR-MS of Compound 2

ISZC #97 RT: 0.43 AV: 1 NL: 1.90E7  
T: FTMS + p ESI Full ms [100.00-1500.00]

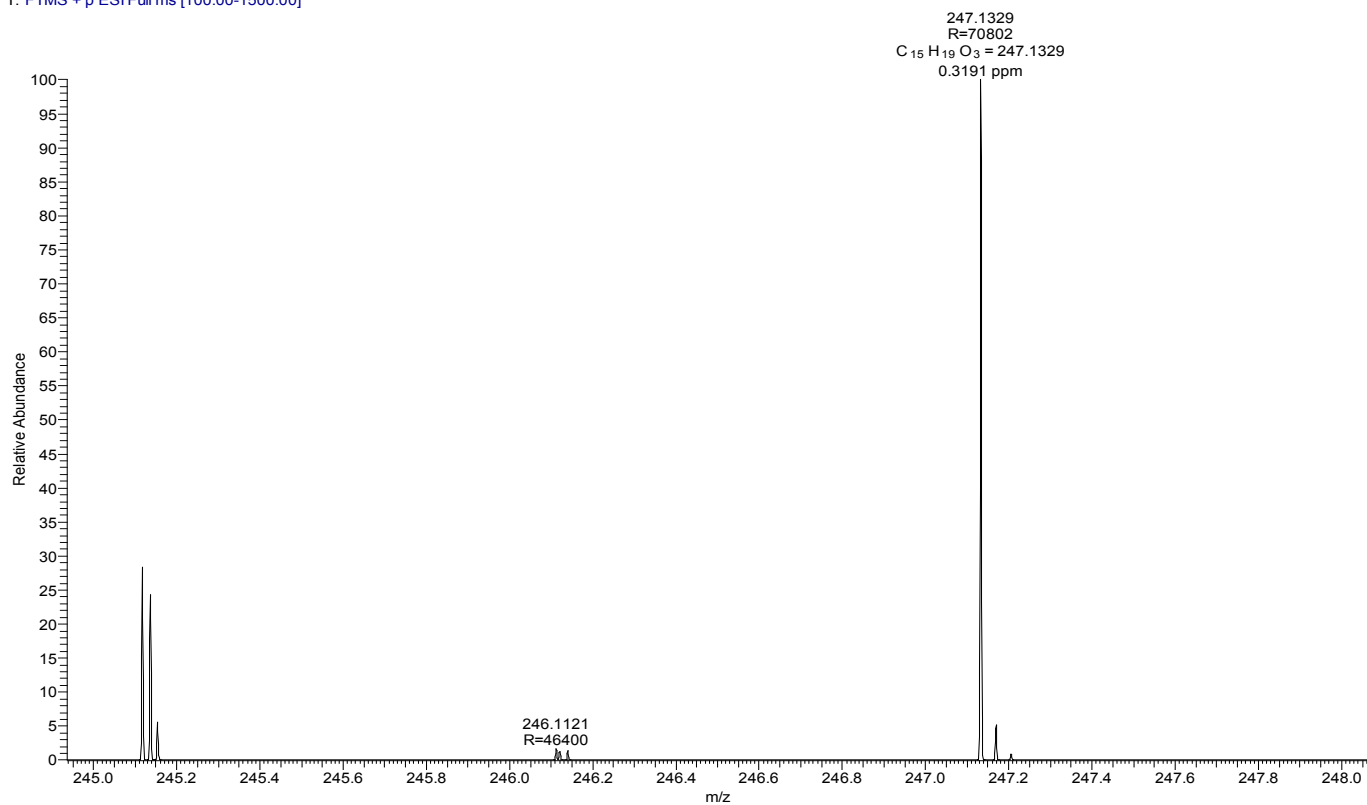

# <sup>1</sup>H NMR of Compound 3 (400 MHz, CDCl<sub>3</sub>)

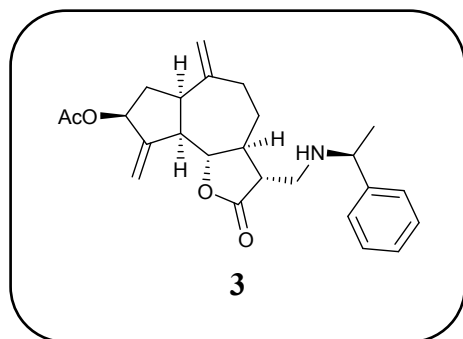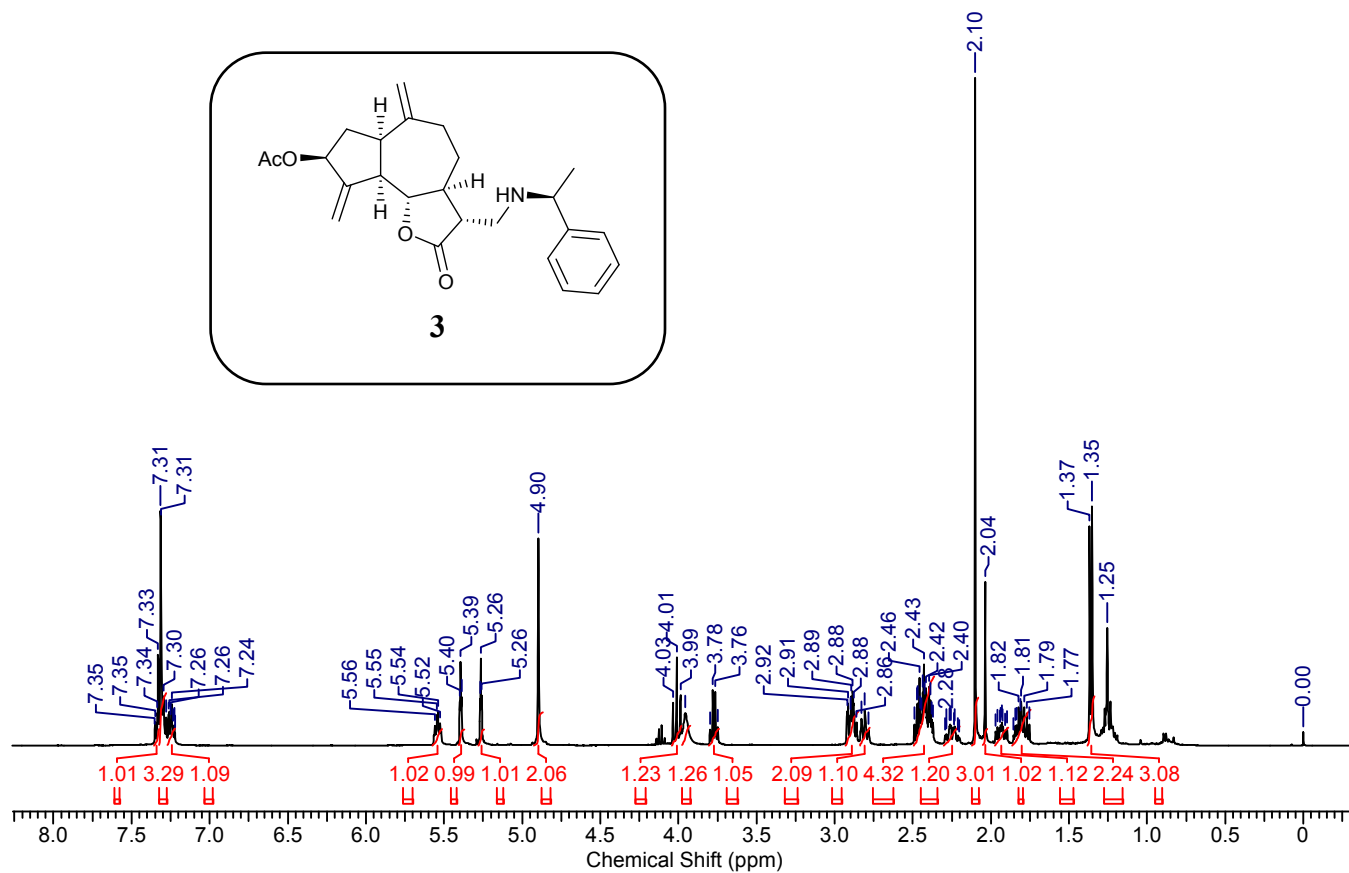

**$^{13}\text{C}$  NMR of Compound 3 (100 MHz,  $\text{CDCl}_3$ )**

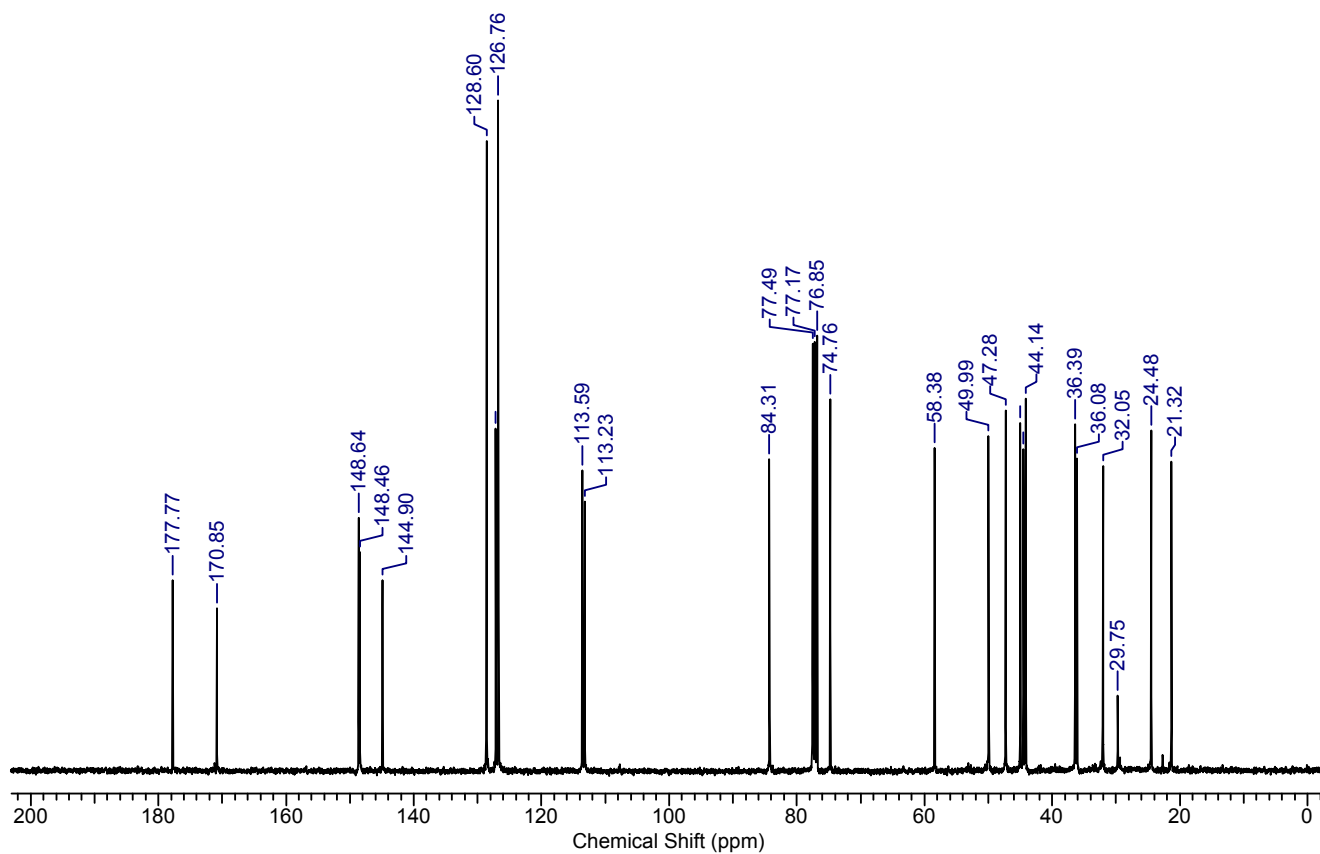

**DEPT of Compound 3 (100 MHz,  $\text{CDCl}_3$ )**

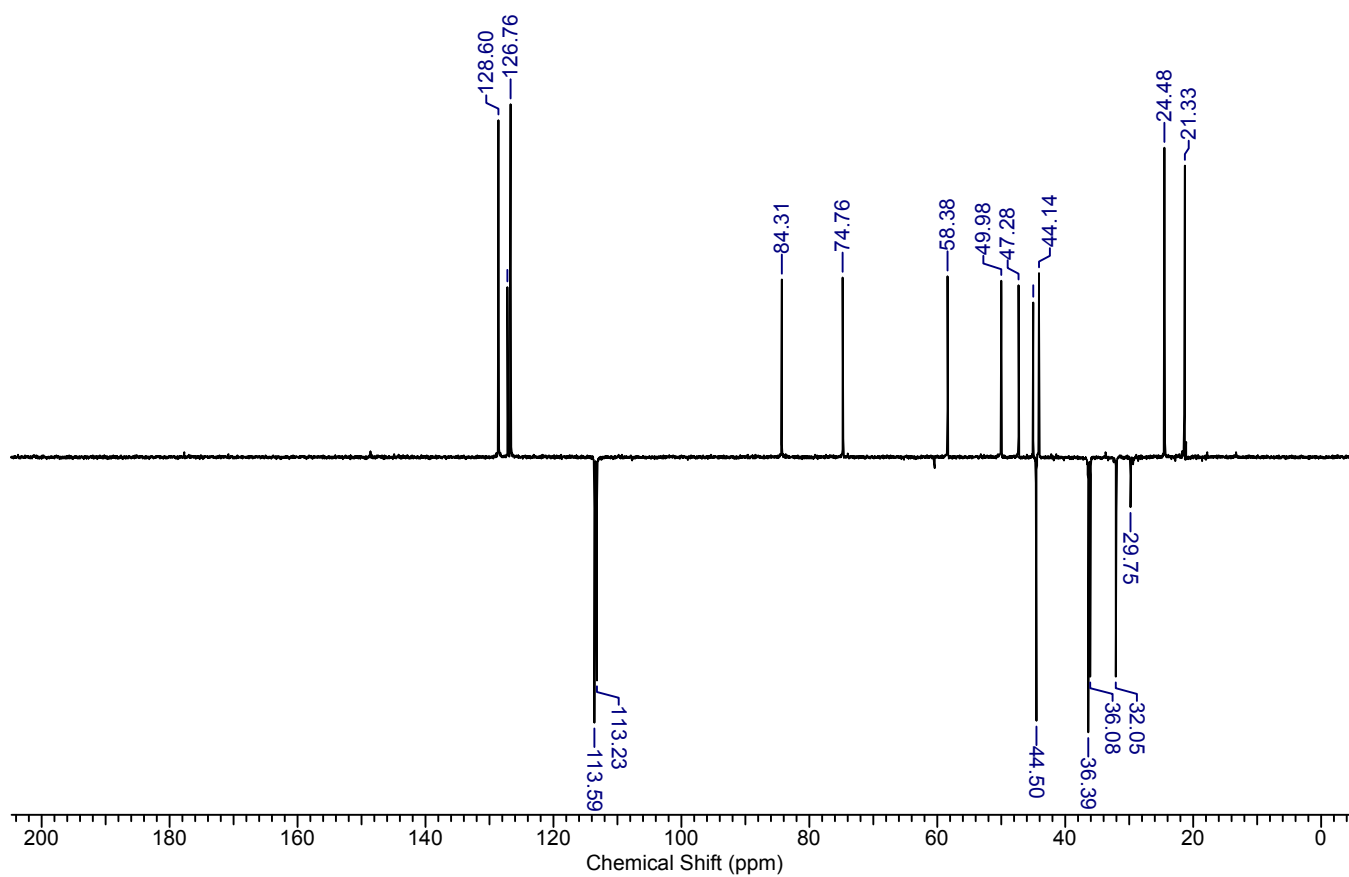



# LC-MS of Compound 3

F:\DATA\June-2014\16\IS-295-A

6/16/2014 4:07:50 PM

IS-295-A #9 RT: 0.14 AV: 1 SB: 63 0.00-0.17, 0.45-1.33 NL: 4.77E5  
T: {0,0} + c ESI corona sid=80.00 det=1600.00 Full ms [ 100.00-2000.00]

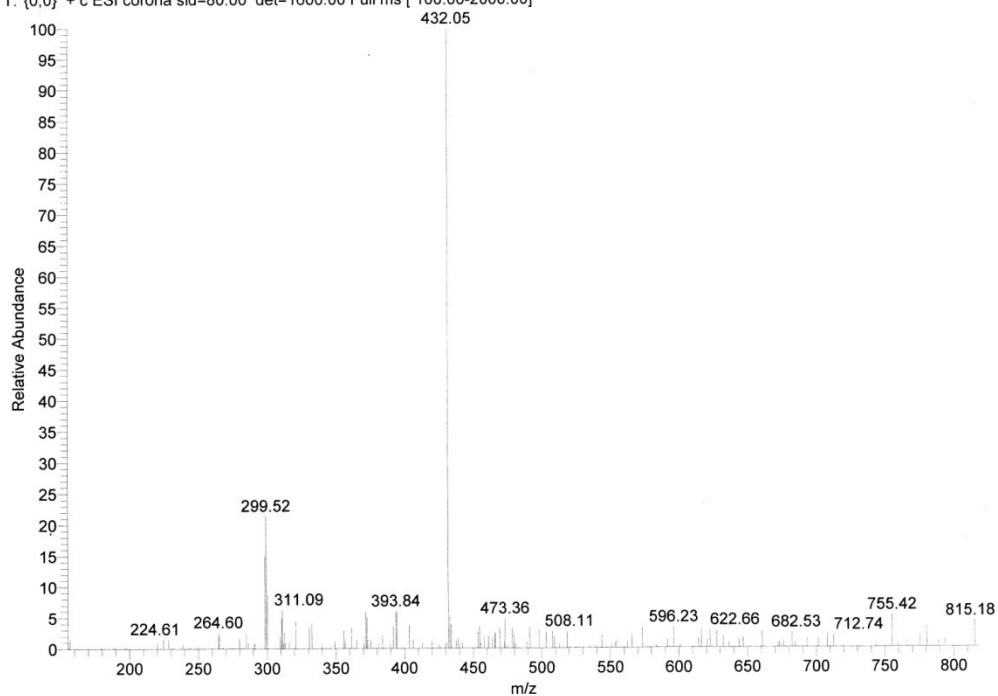

# HR-MS of Compound 3

IS-295-A #86 RT: 0.38 AV: 1 NL: 1.42E10  
T: FTMS + p ESI Full ms [133.40-2000.00]

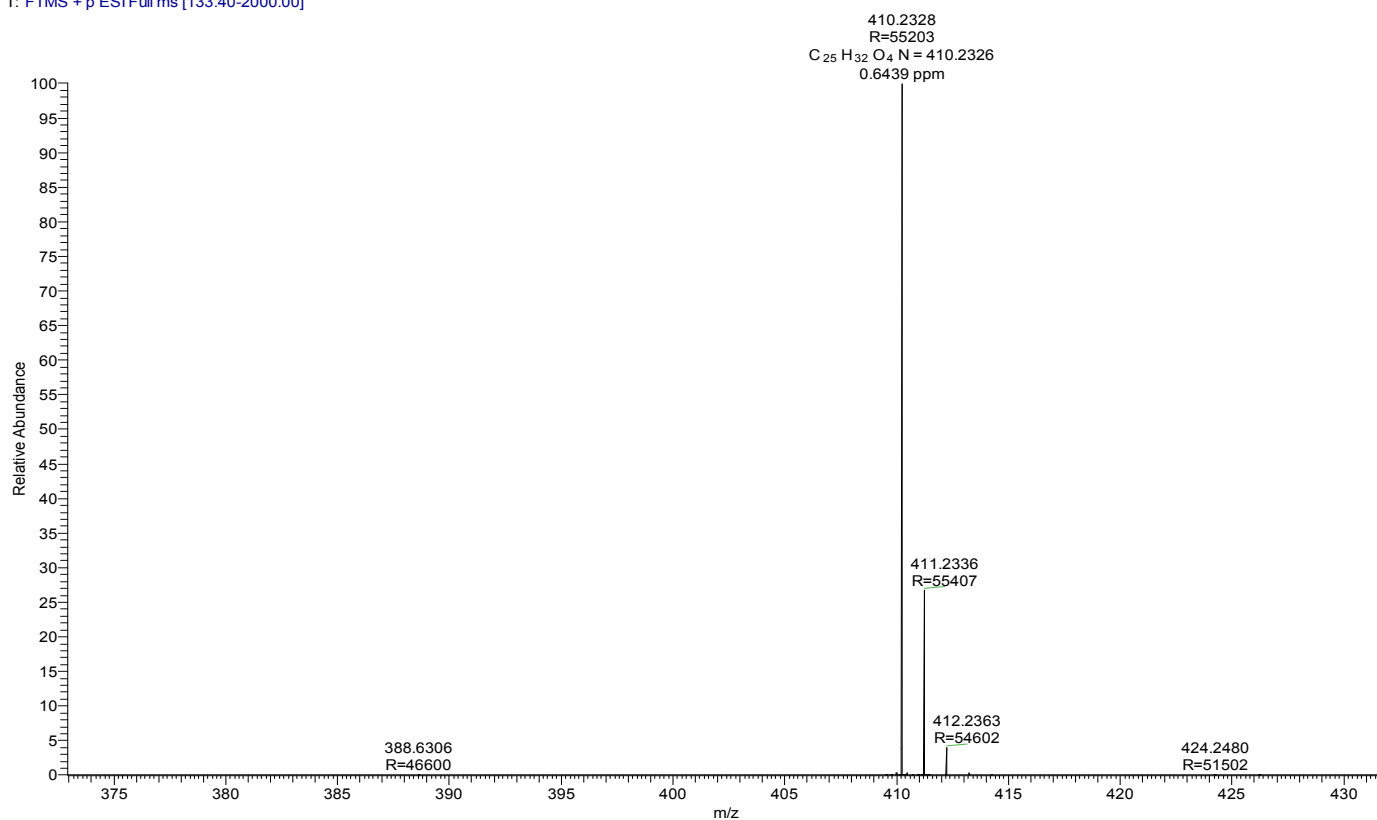

NOESY

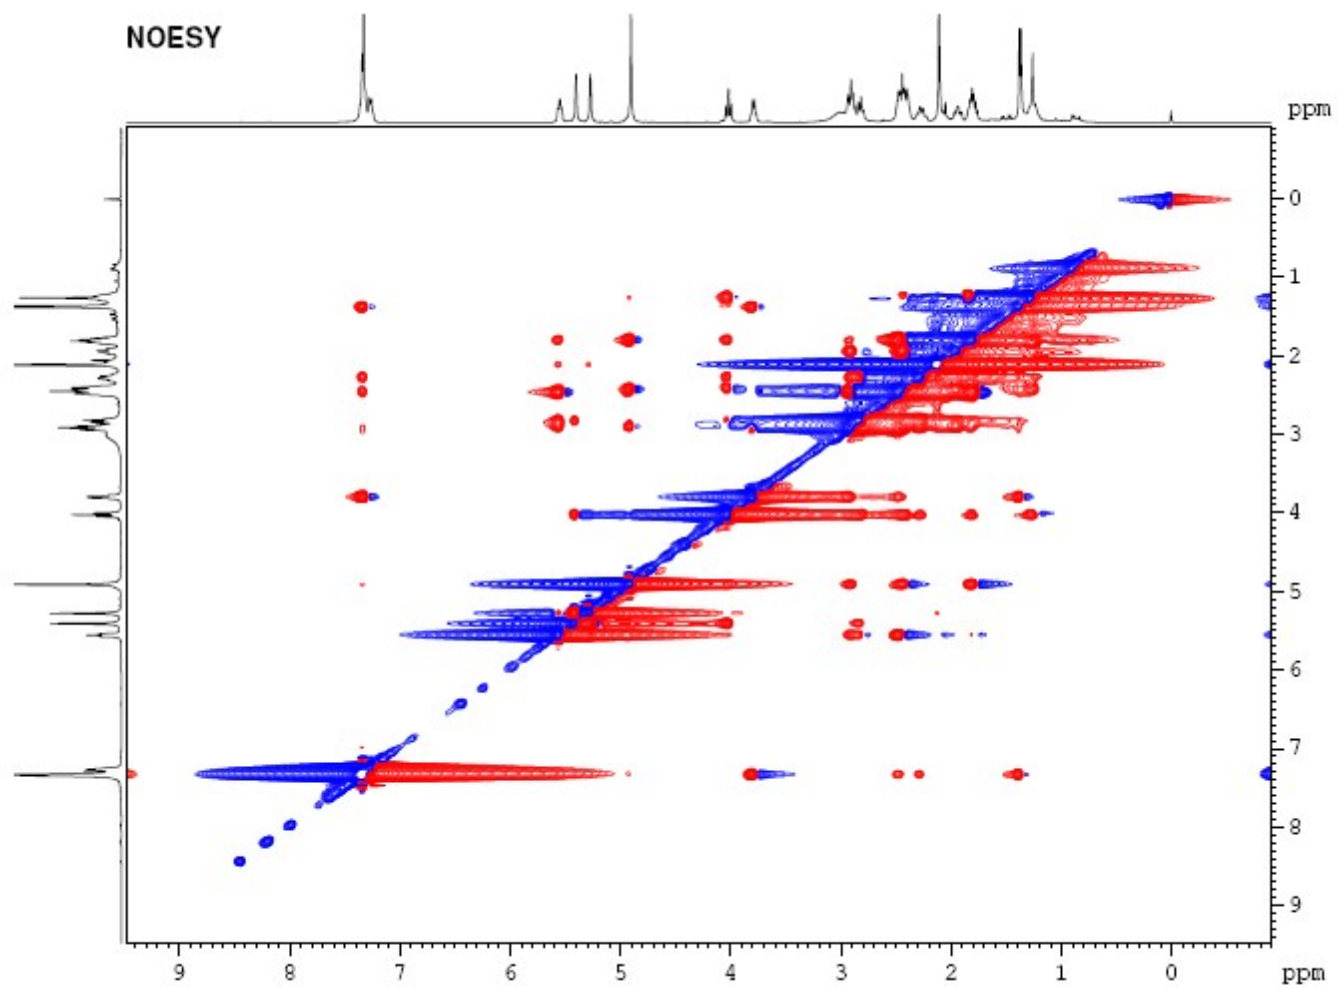

NOESY

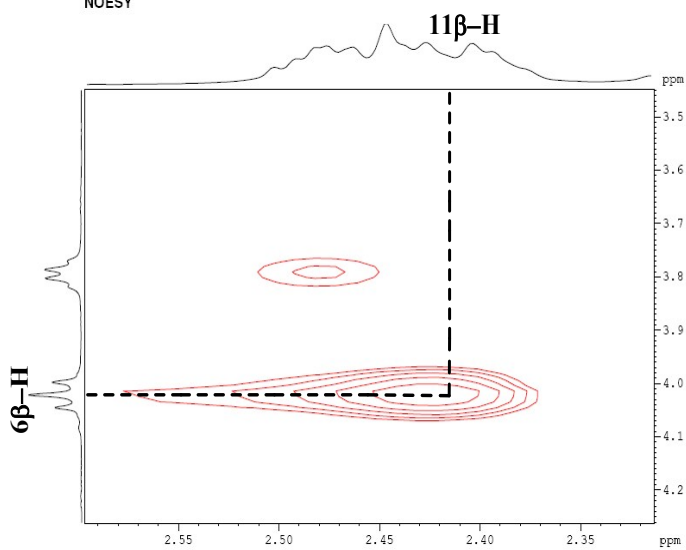

NOESY

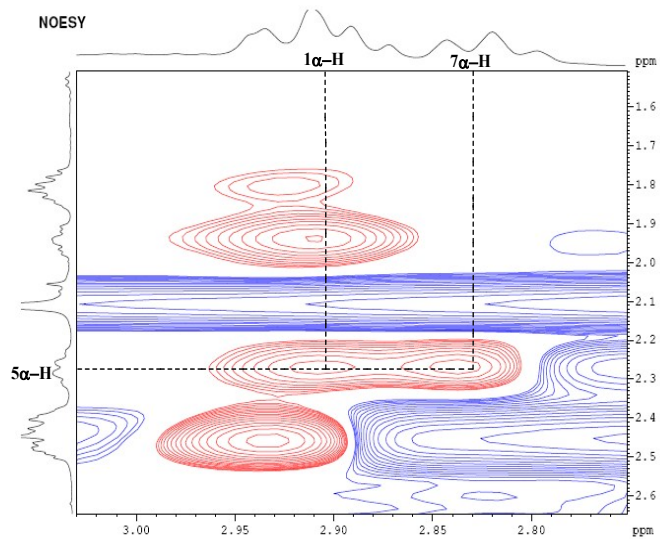

### <sup>1</sup>H NMR of Compound 4 (400 MHz, CDCl<sub>3</sub>)

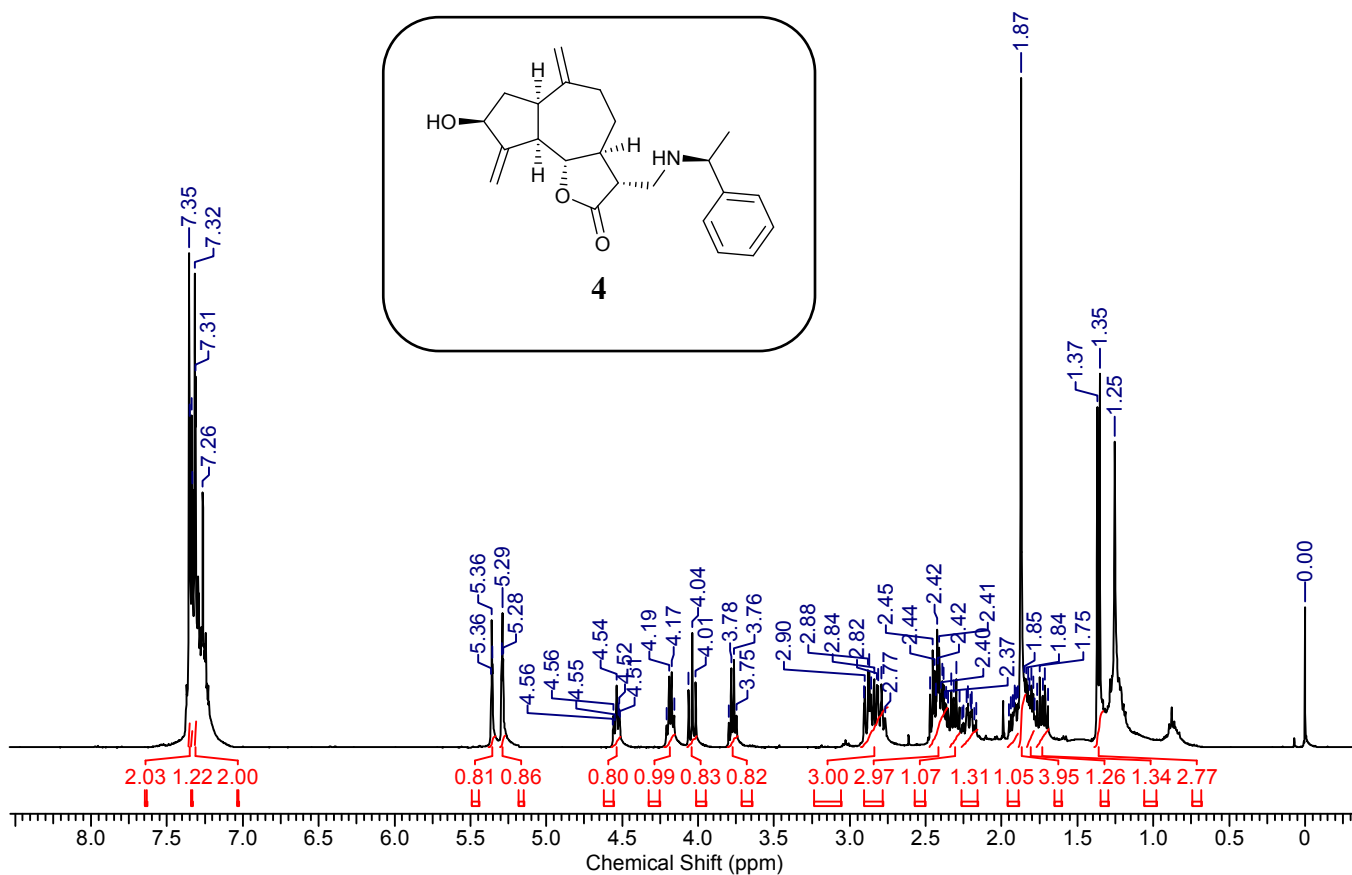

### <sup>13</sup>C NMR of Compound 4 (100 MHz, CDCl<sub>3</sub>)

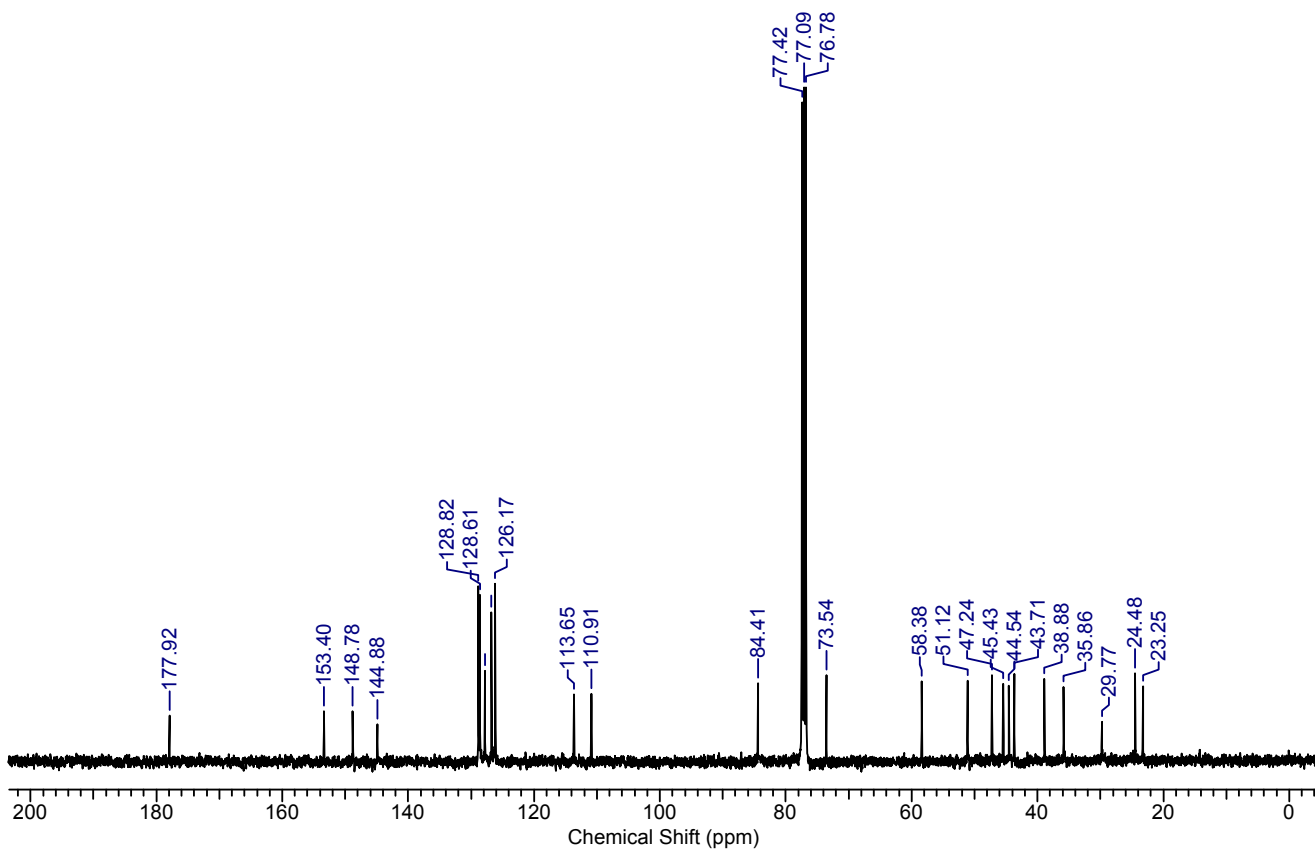

### DEPT of Compound 4 (100 MHz, CDCl<sub>3</sub>)

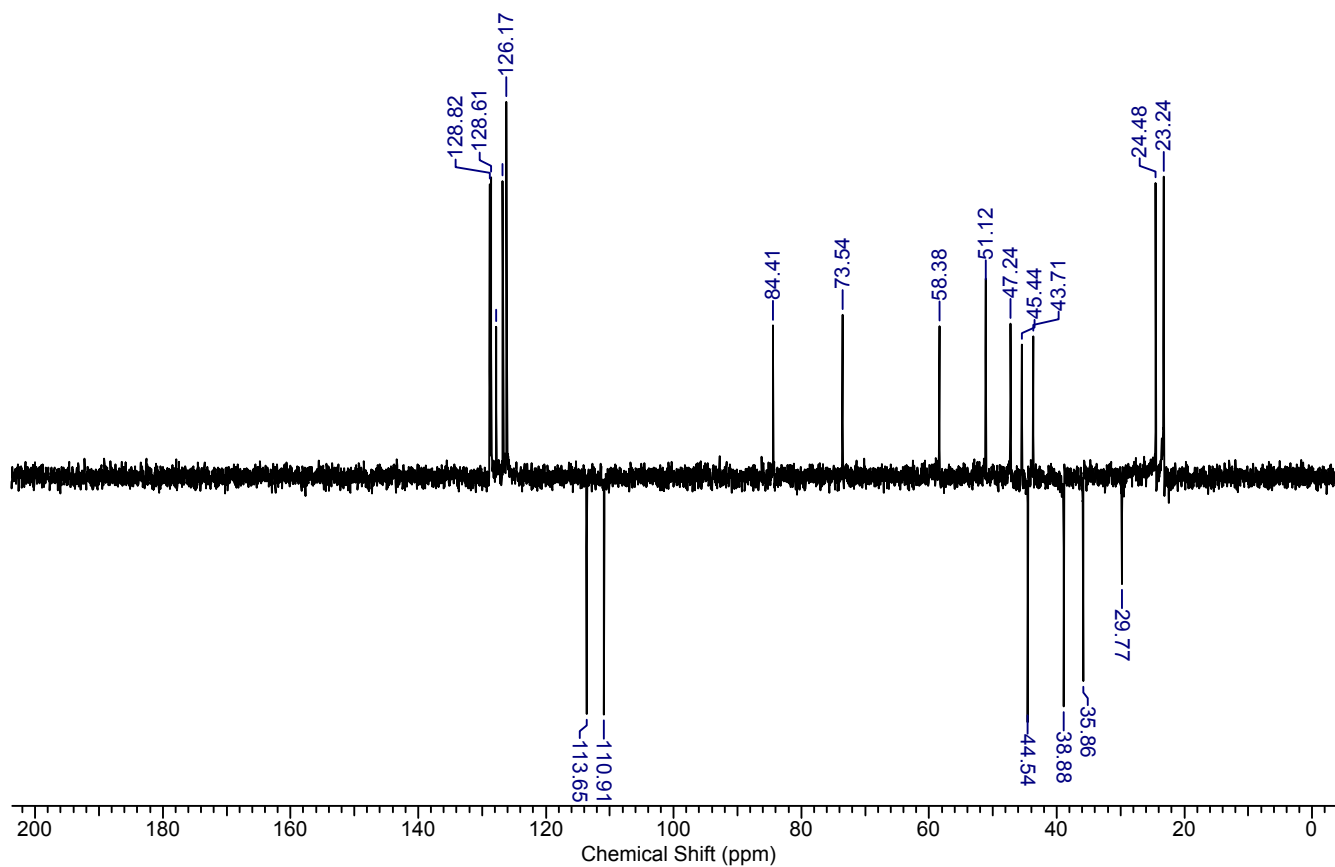

### LC-MS of Compound 4

F:\DATA\June-2014\12\IS-295-b

6/12/2014 4:34:40 PM

IS-295-b #8-25 RT: 0.12-0.42 AV: 18 SB: 85 0.00-0.17, 0.42-1.68 NL: 2.84E5  
T: {0,0} + c ESI corona sid=80.00 det=1600.00 Full ms [ 100.00-2000.00]

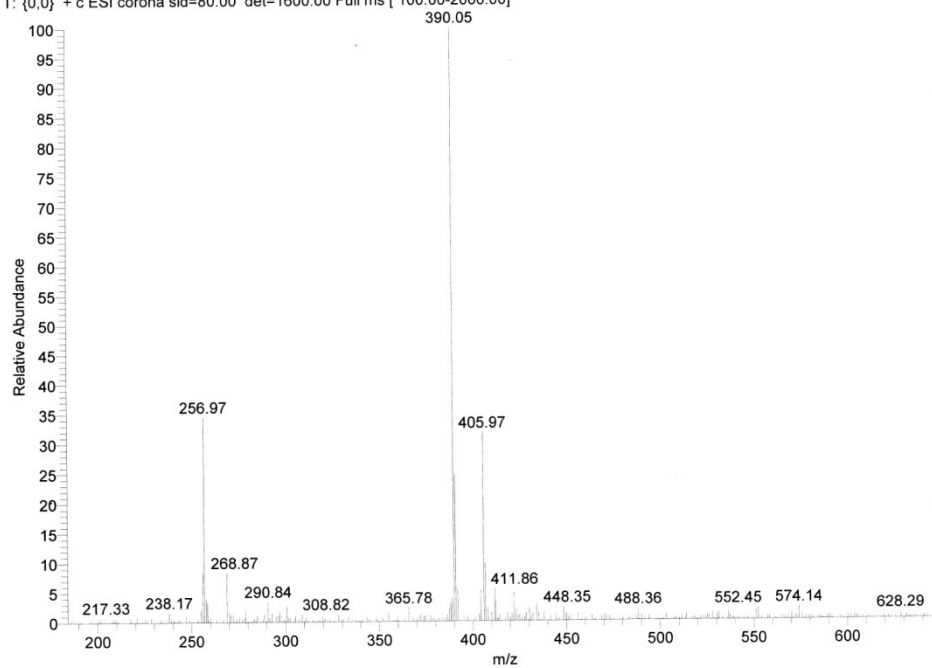

# HR-MS of Compound 4

IS-295-B\_160308160222 #86 RT: 0.38 AV: 1 NL: 5.63E9  
T: FTMS + p ESI Full ms [133.40-2000.00]

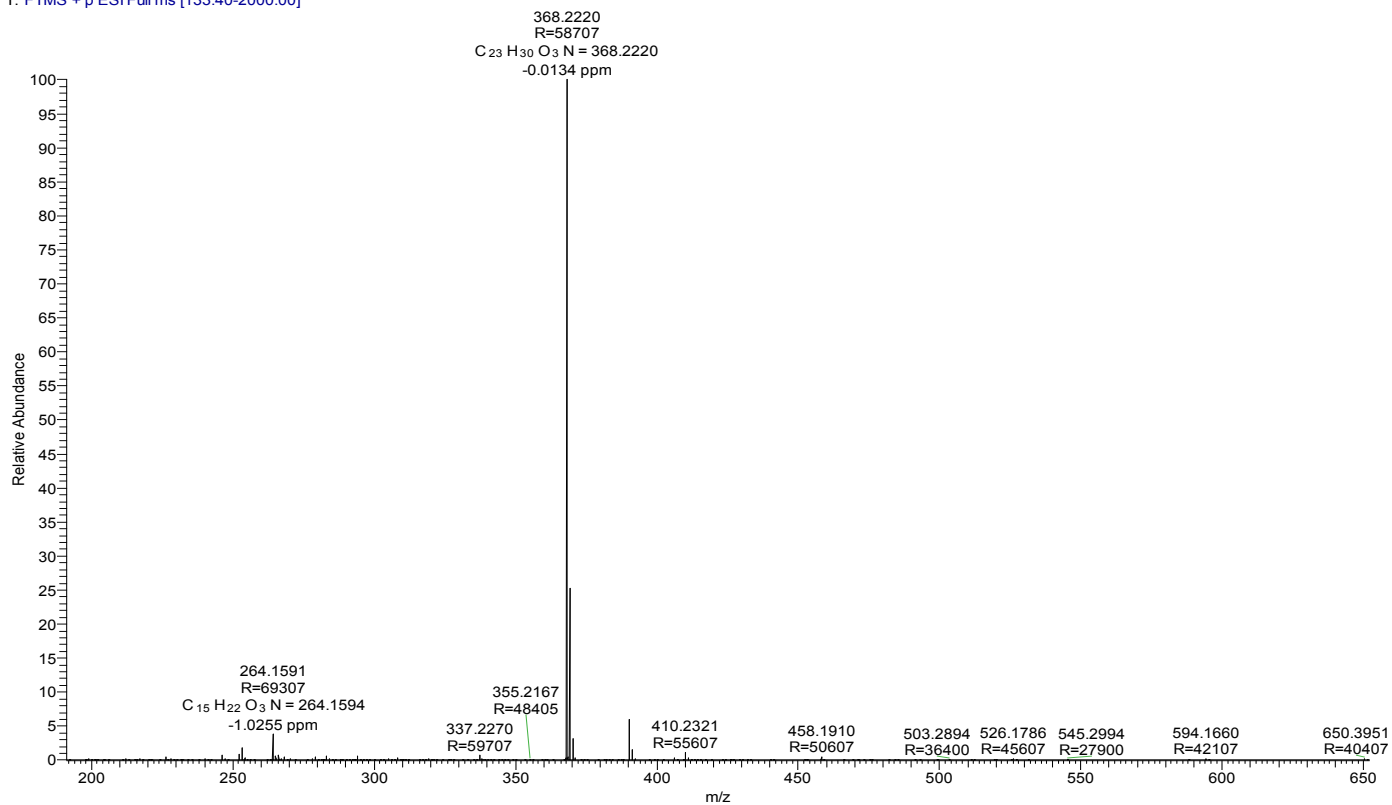

# <sup>1</sup>H NMR of Compound 5 (200 MHz, CDCl<sub>3</sub>)

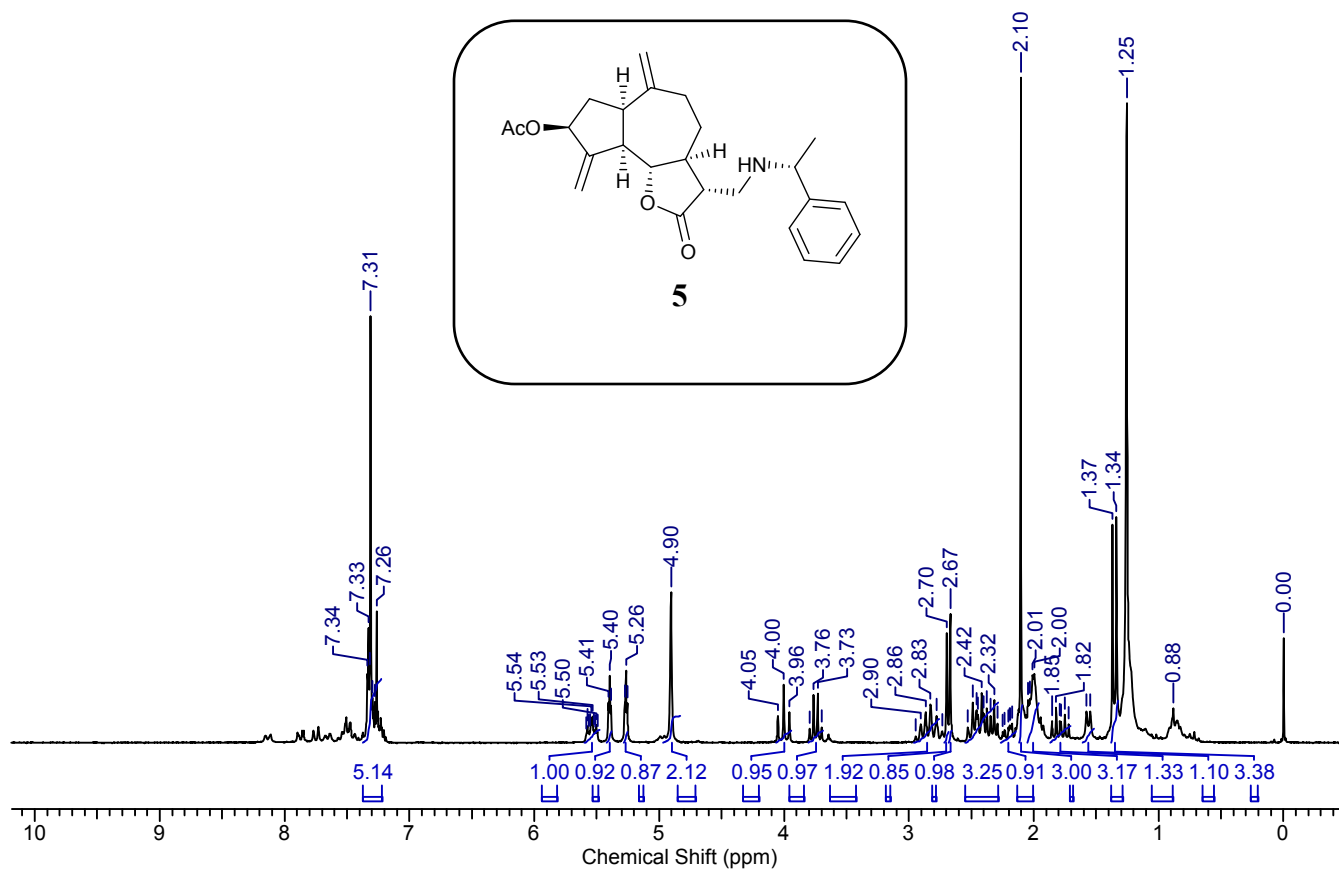

### $^{13}\text{C}$ NMR of Compound 5 (125 MHz, $\text{CDCl}_3$ )

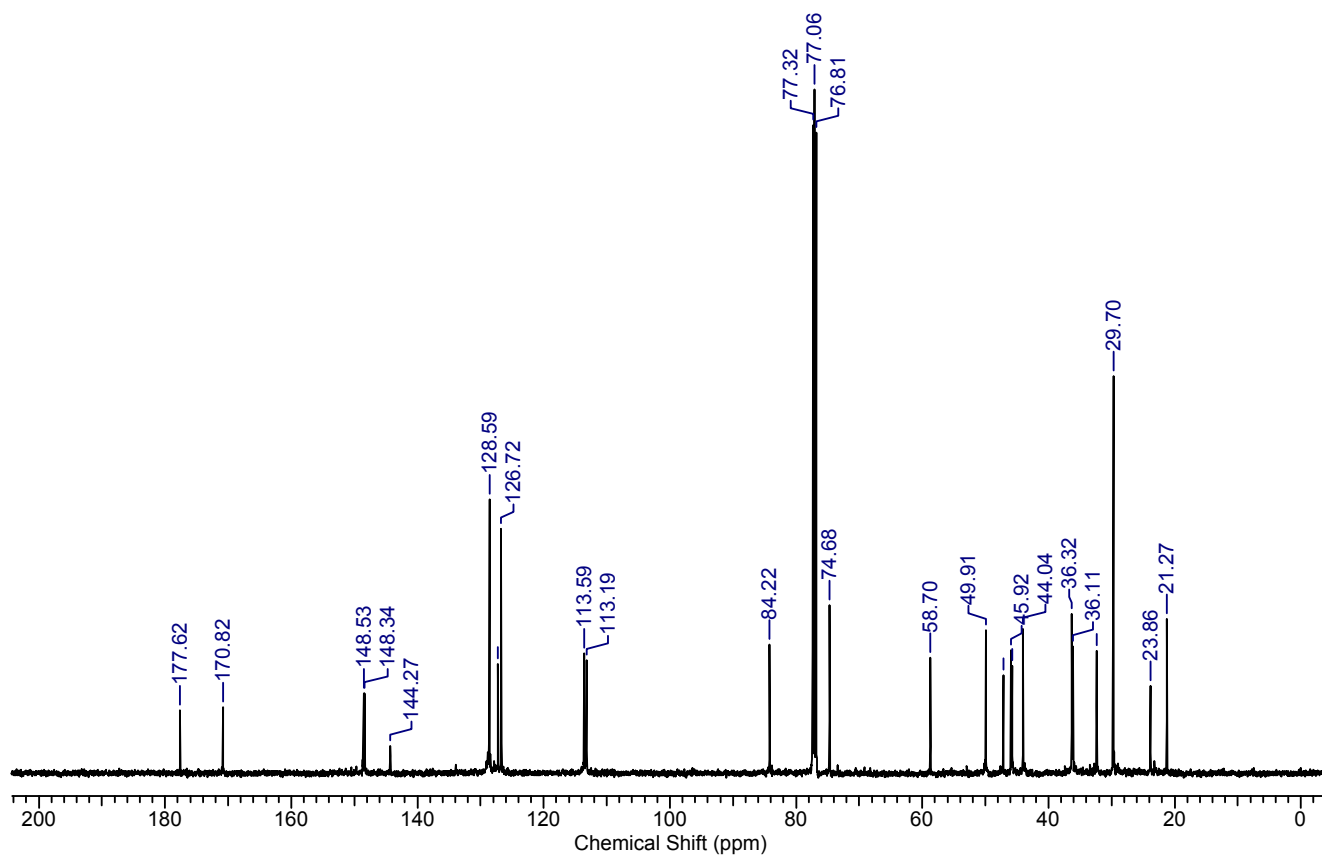

### DEPT of Compound 5 (25 MHz, $\text{CDCl}_3$ )

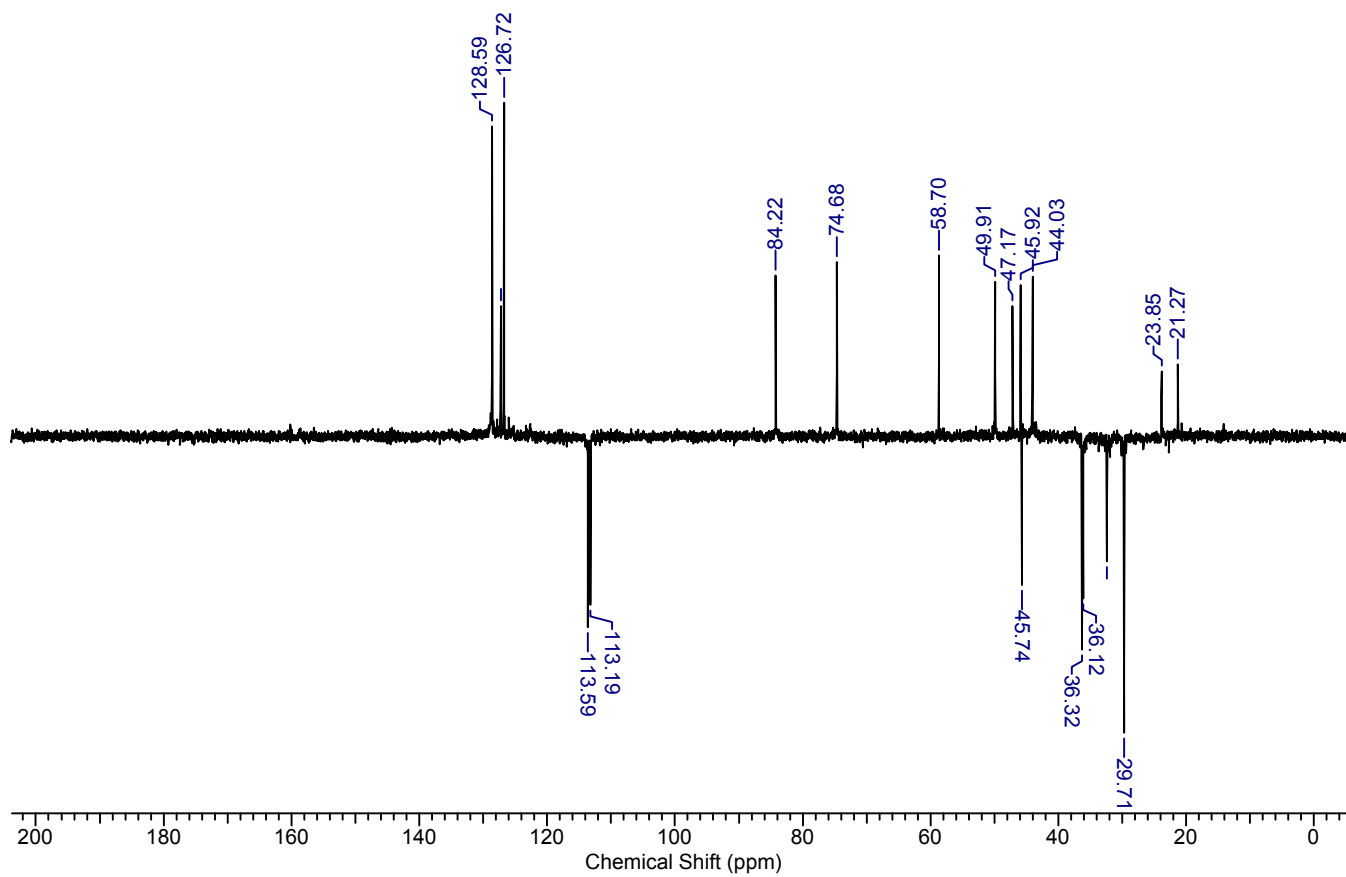

# LC-MS of Compound 5

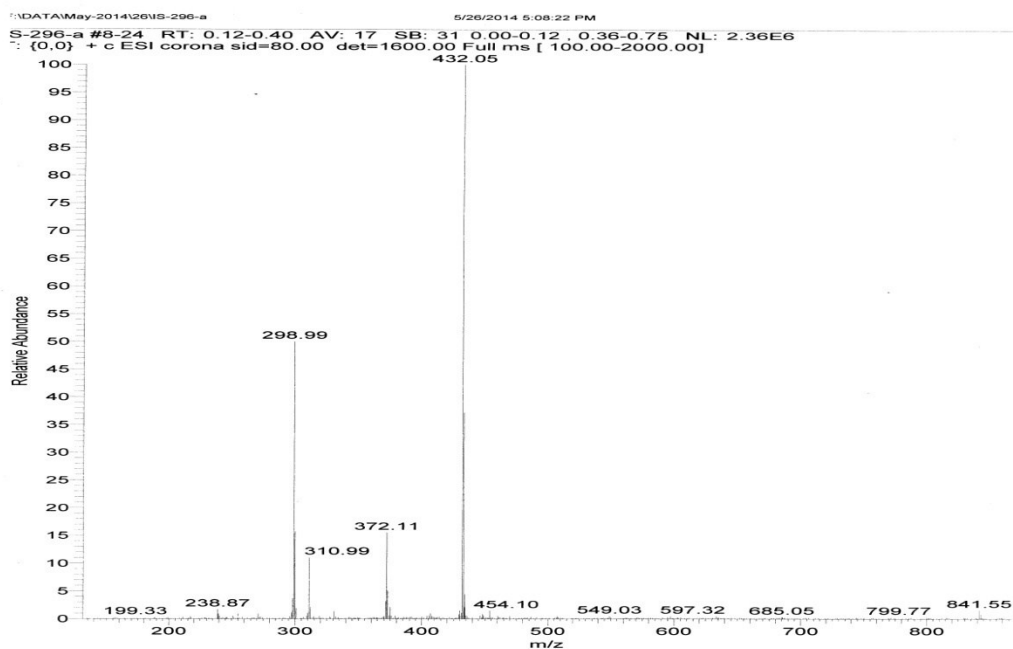

# HR-MS of Compound 5

IS-296-A #86 RT: 0.38 AV: 1 NL: 6.94E9  
T: FTMS + p ESI Full ms [100.00-1500.00]

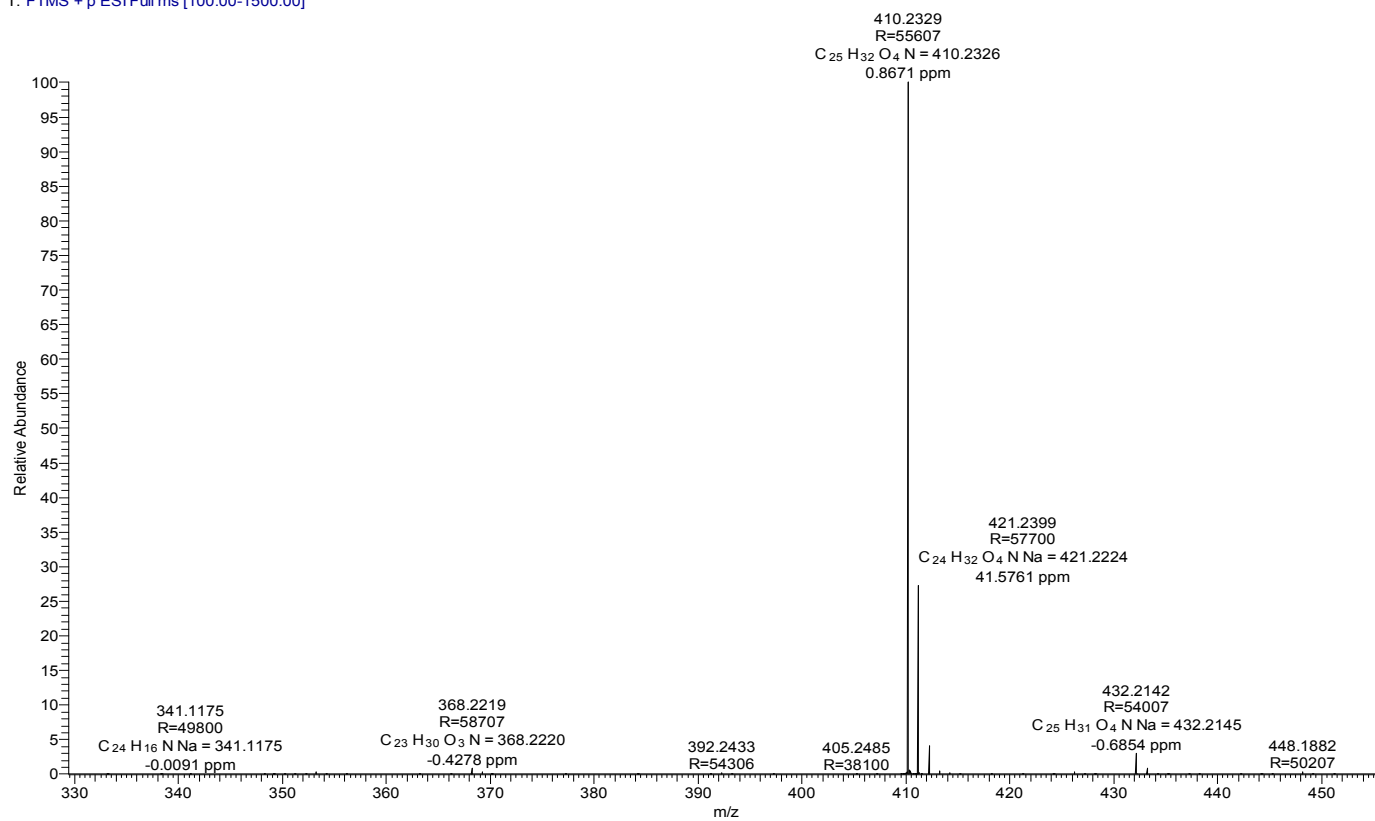

### <sup>1</sup>H NMR of Compound 6 (200 MHz, CDCl<sub>3</sub>)

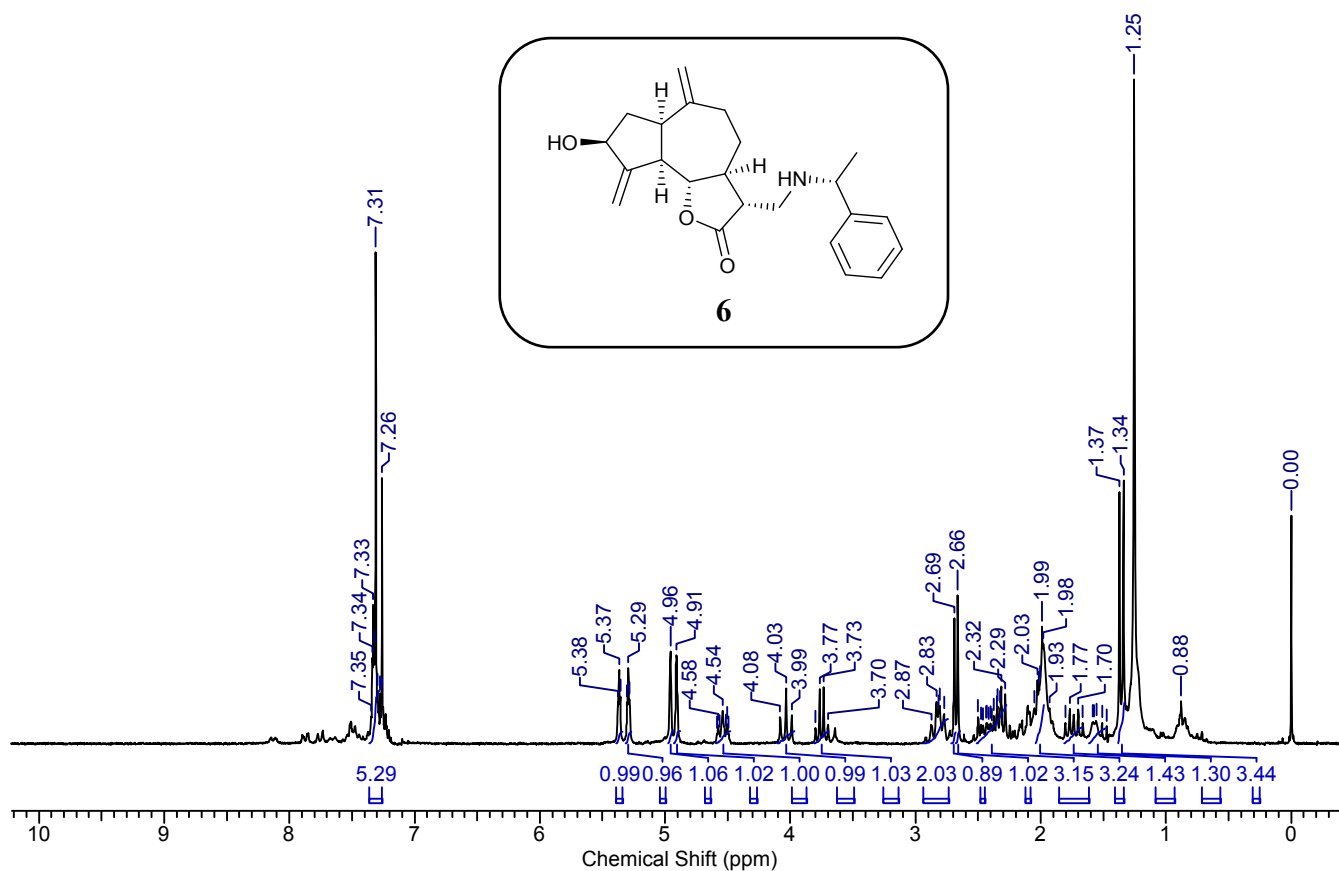

### <sup>13</sup>C NMR of Compound 6 (125 MHz, CDCl<sub>3</sub>)

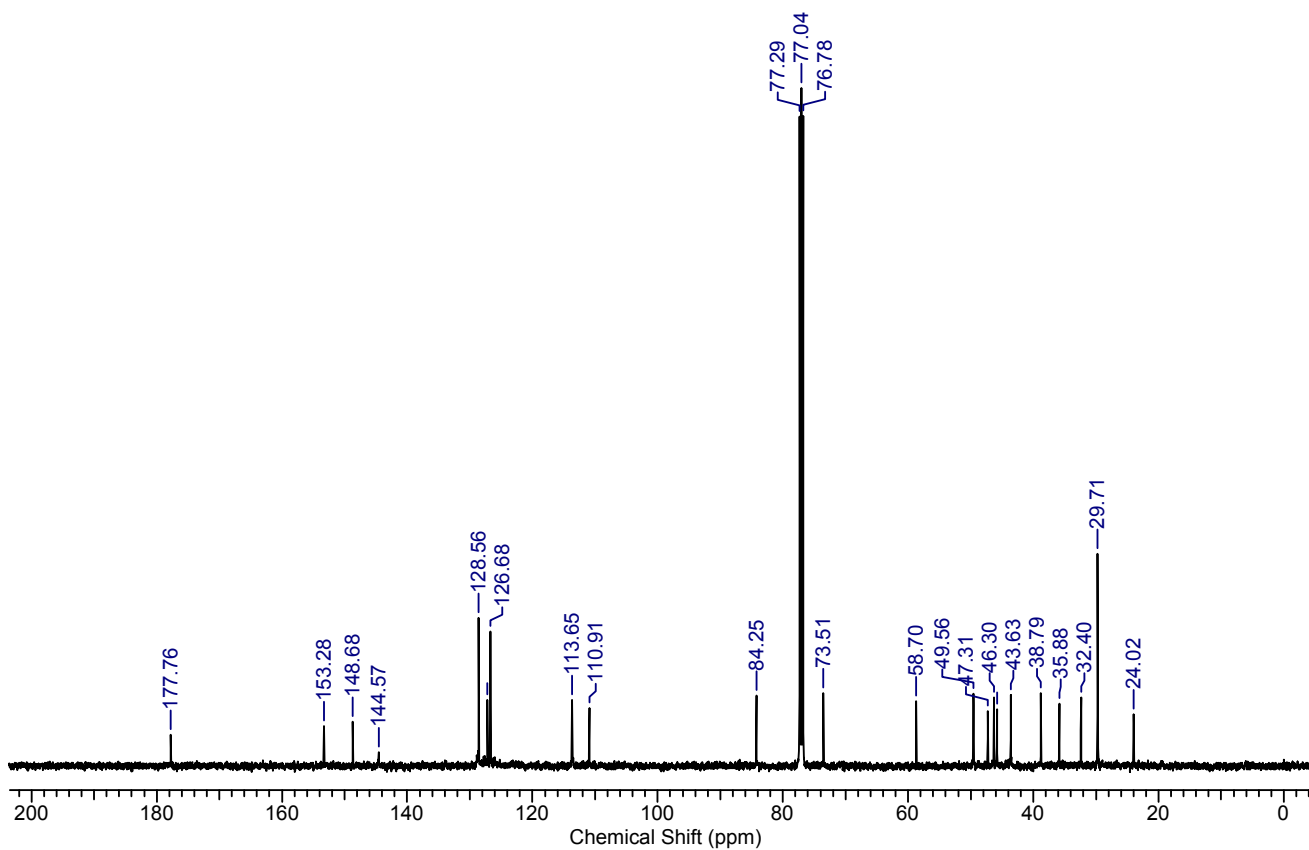



### DEPT of Compound 6 (125 MHz, CDCl<sub>3</sub>)

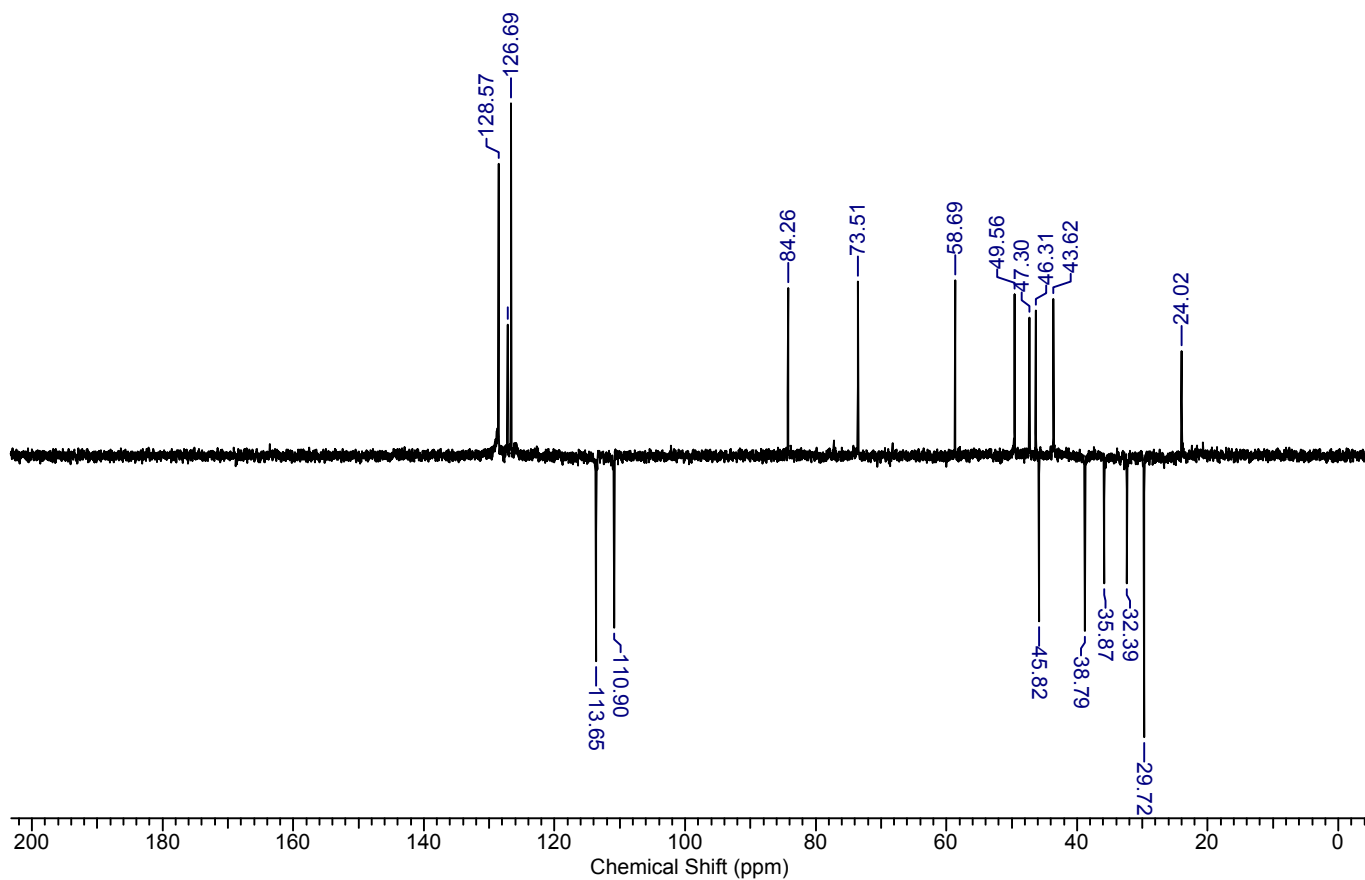

### LC-MS of Compound 6

F:\DATA\June-2014\10\IS-296-B

6/10/2014 4:22:47 PM

IS-296-B #8-23 RT: 0.12-0.38 AV: 16 SB: 33 0.00-0.12, 0.38-0.80 NL: 4.82E5  
T: {0,0} + c ESI corona sid=80.00 det=1600.00 Full ms [ 100.00-2000.00]

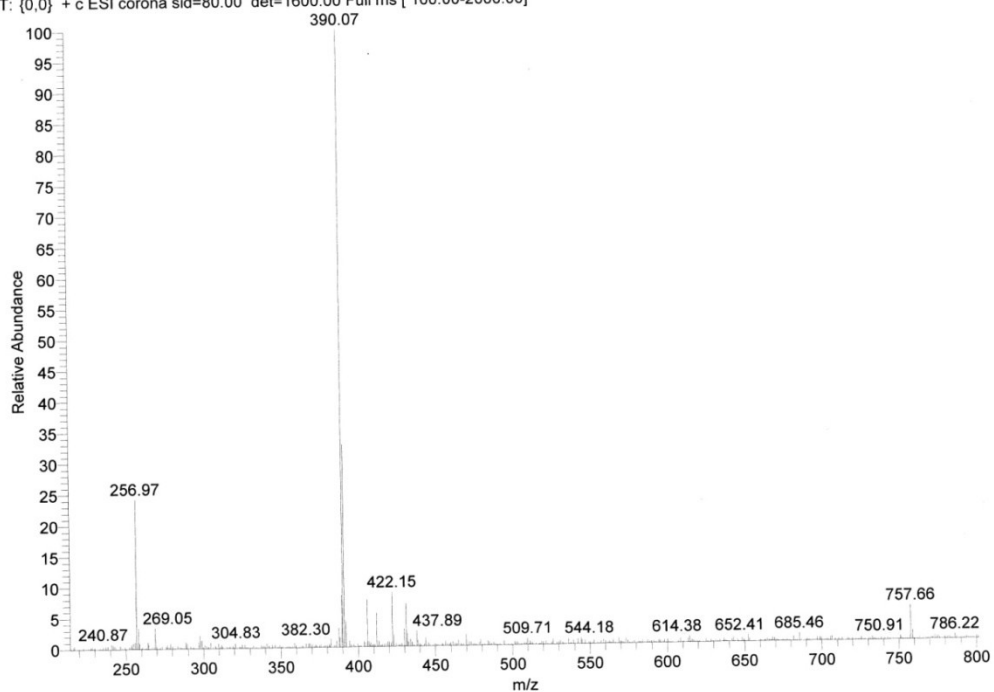

# HR-MS of Compound 6

IS-296-B #79 RT: 0.35 AV: 1 NL: 8.77E9  
T: FTMS + p ESI Full ms [100.00-1500.00]

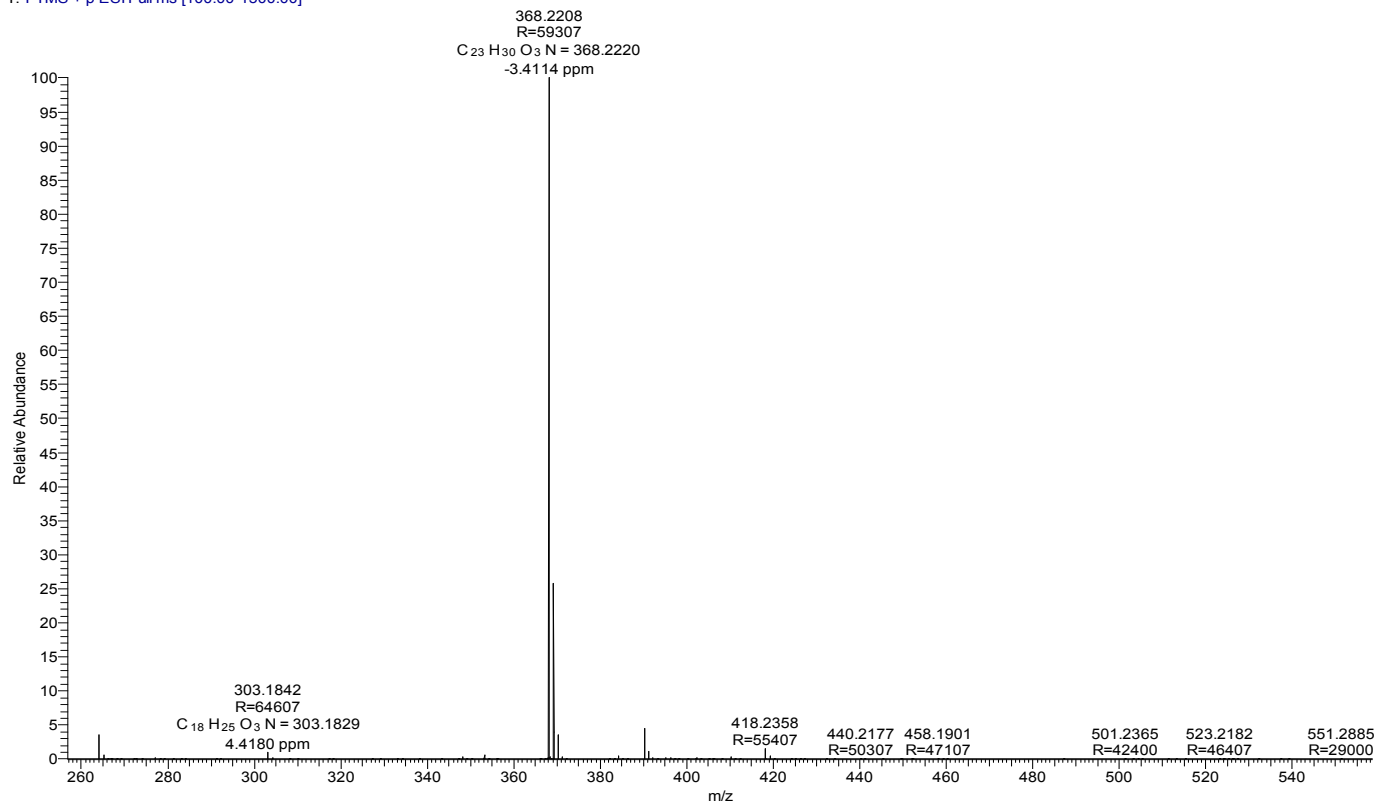

# <sup>1</sup>H NMR of Compound 7 (200 MHz, CDCl<sub>3</sub>)

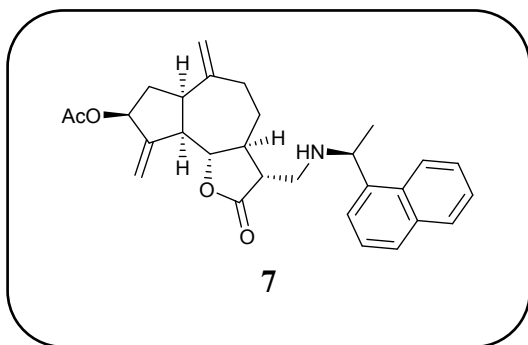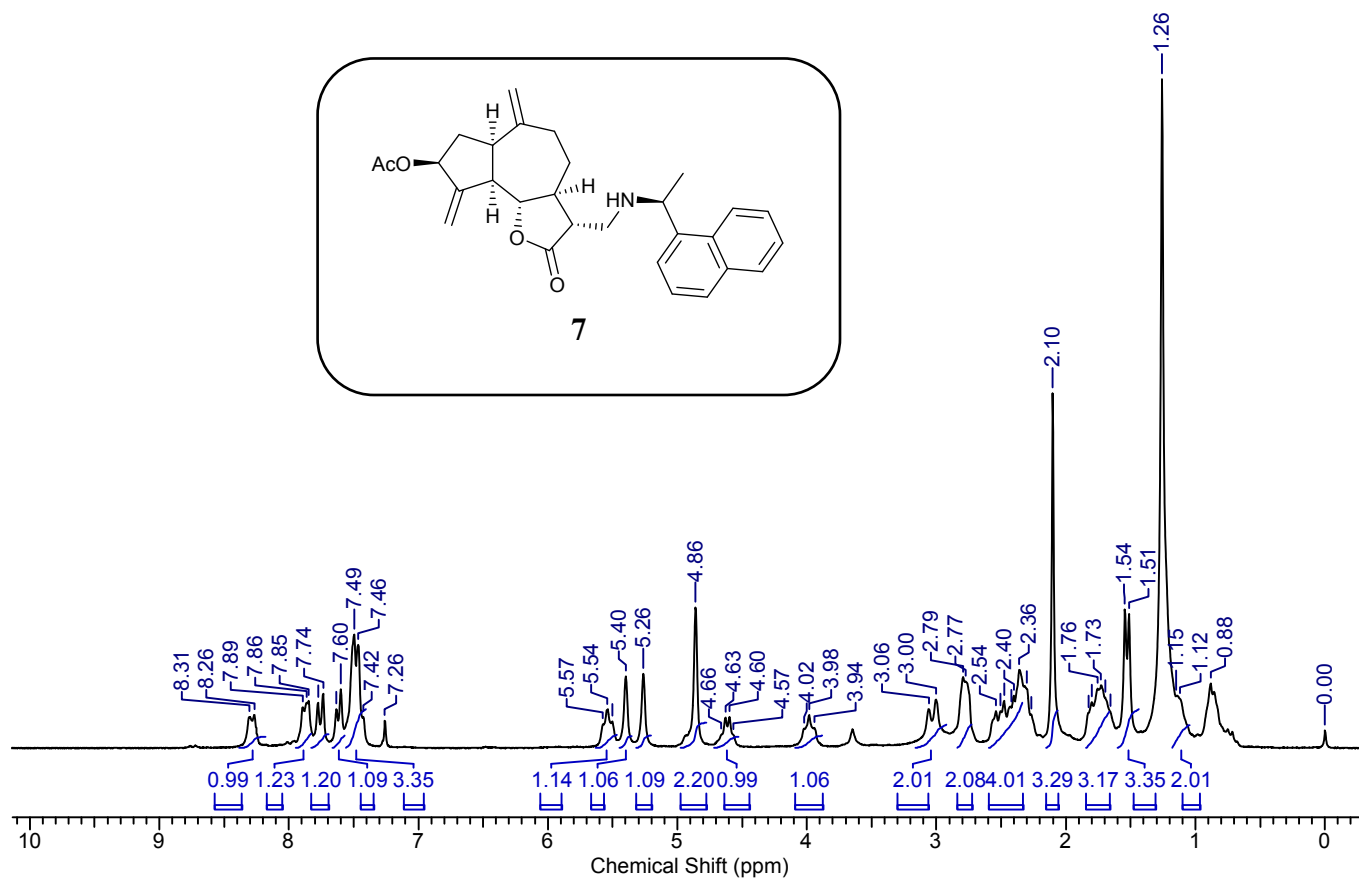

### <sup>13</sup>C NMR of Compound 7 (100 MHz, CDCl<sub>3</sub>)

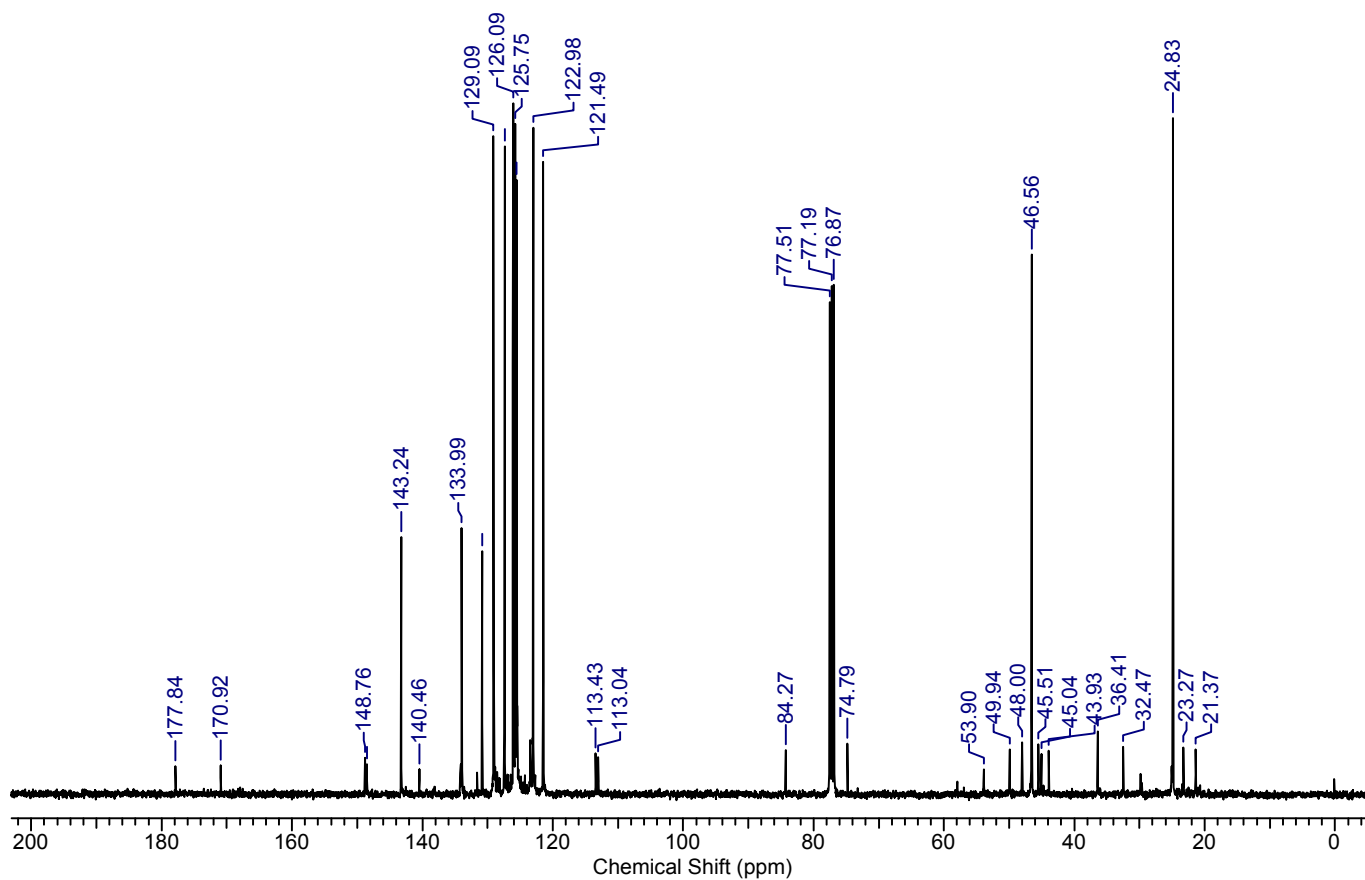

### DEPT of Compound 7 (100 MHz, CDCl<sub>3</sub>)

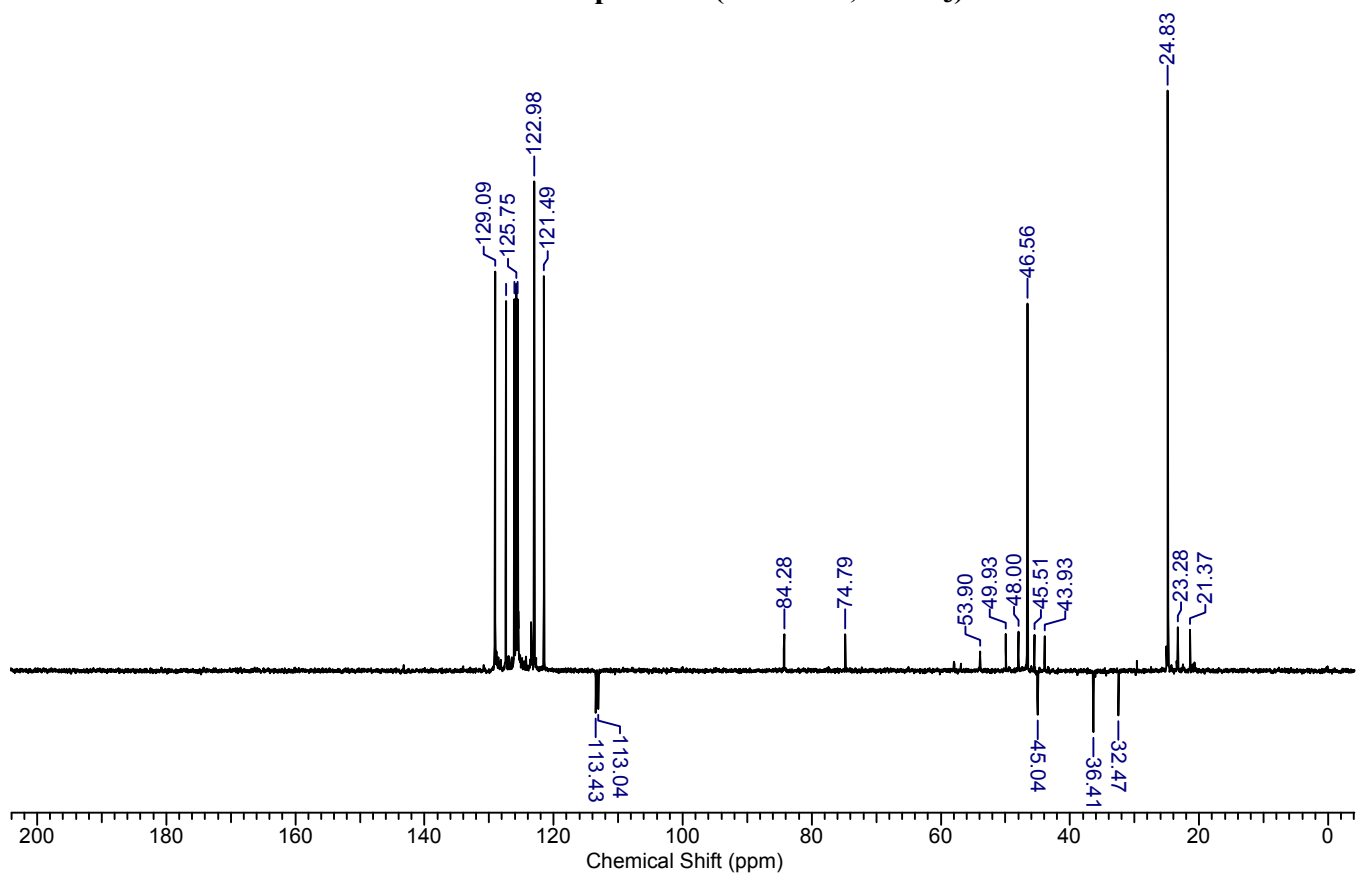

# LC-MS of Compound 7

F:\DATA\June-2014\110\IS-283A

6/10/2014 4:26:56 PM

IS-283A #8-27 RT: 0.12-0.45 AV: 20 SB: 34 0.00-0.12, 0.35-0.78 NL: 4.85E4  
T: {0,0} + c ESI corona sid=80.00 det=1600.00 Full ms [ 100.00-2000.00]

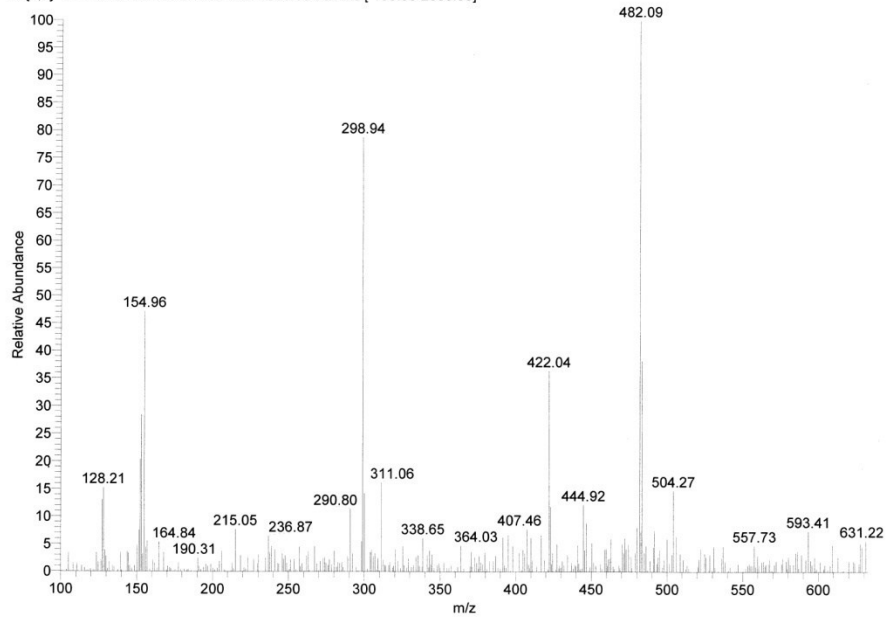

# HR-MS of Compound 7

IS-283-A #104 RT: 0.46 AV: 1 NL: 1.18E10  
T: FTMS + p ESI Full ms [100.00-1500.00]

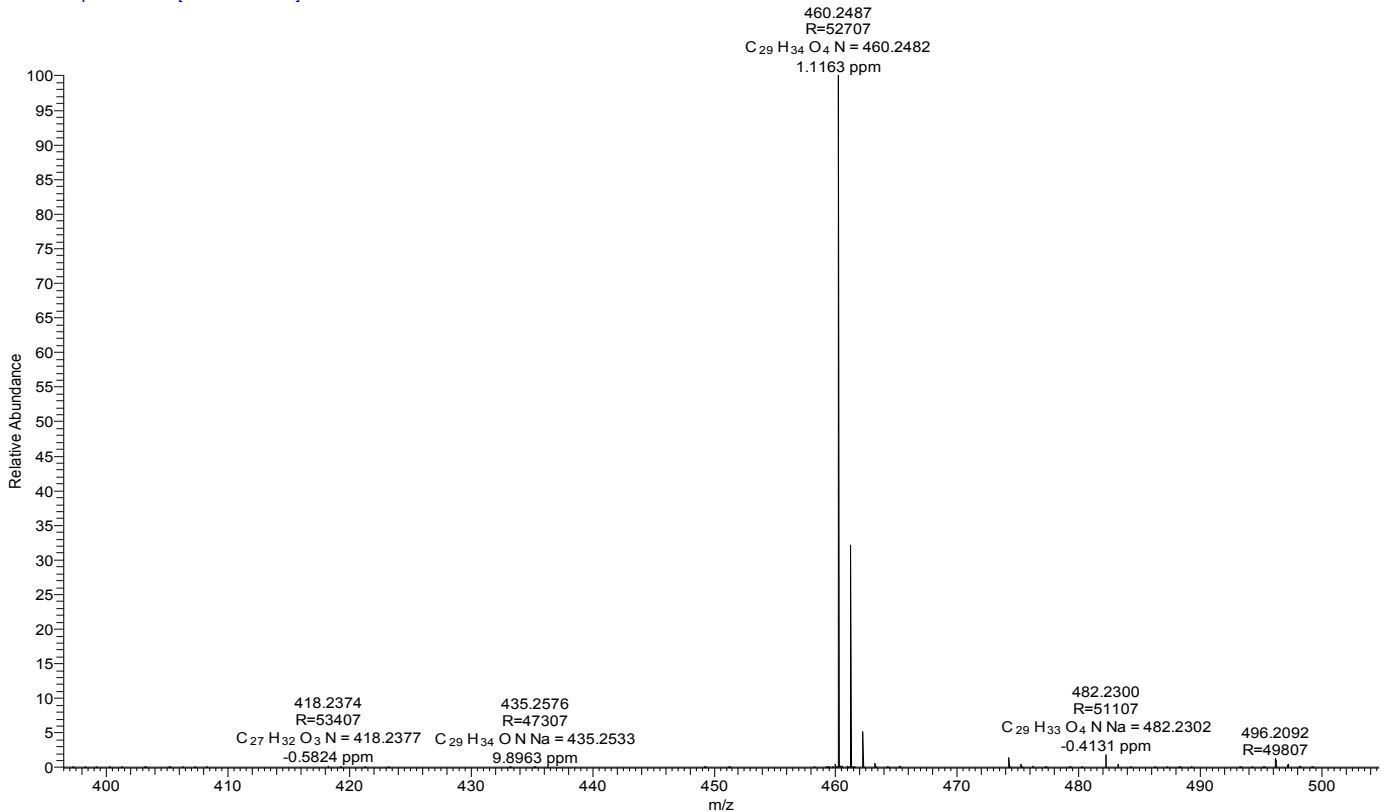

### <sup>1</sup>H NMR of Compound 8 (400 MHz, CDCl<sub>3</sub>)

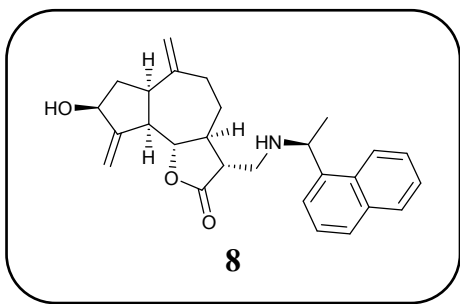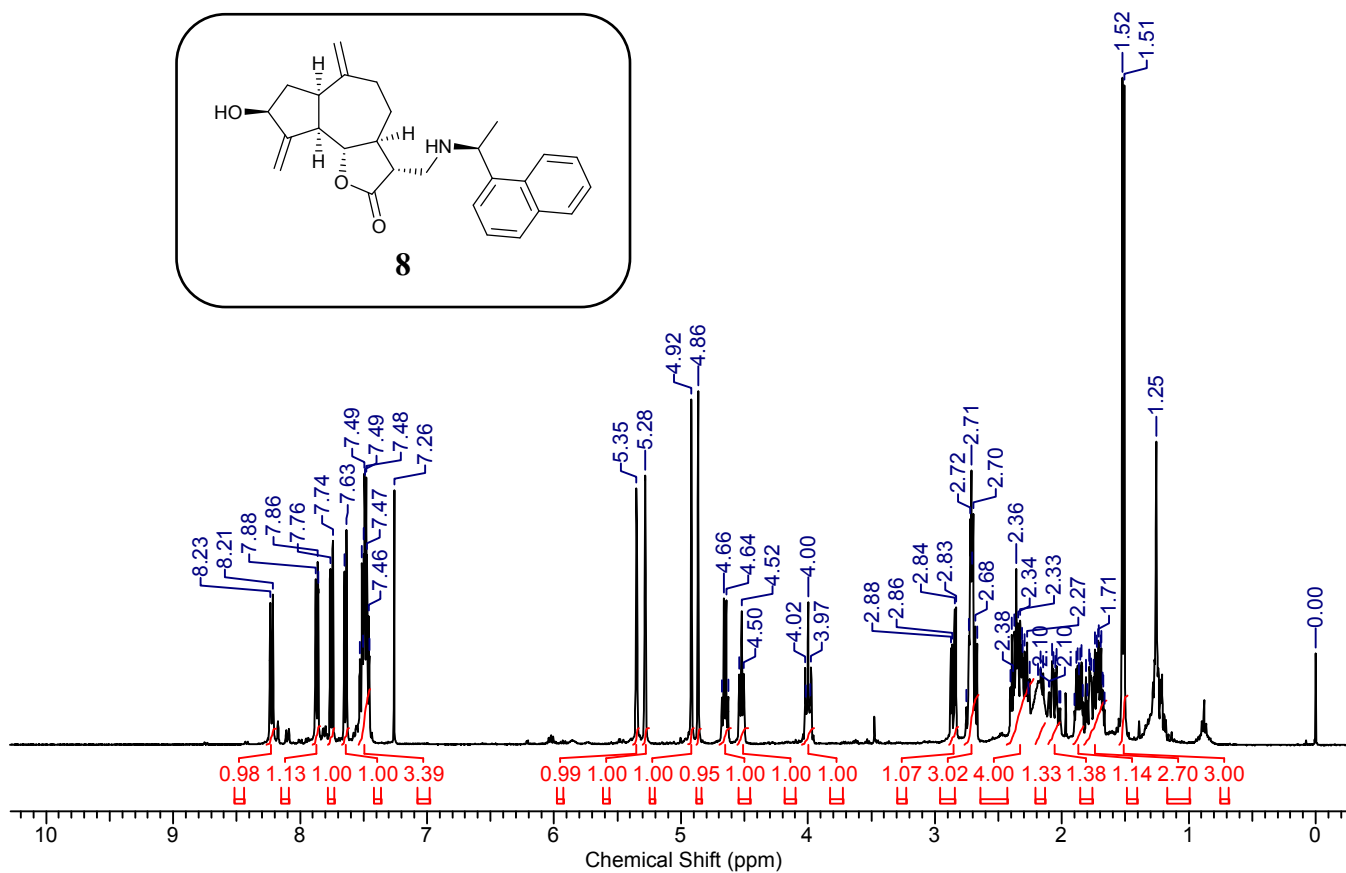

### <sup>13</sup>C NMR of Compound 8 (100 MHz, CDCl<sub>3</sub>)

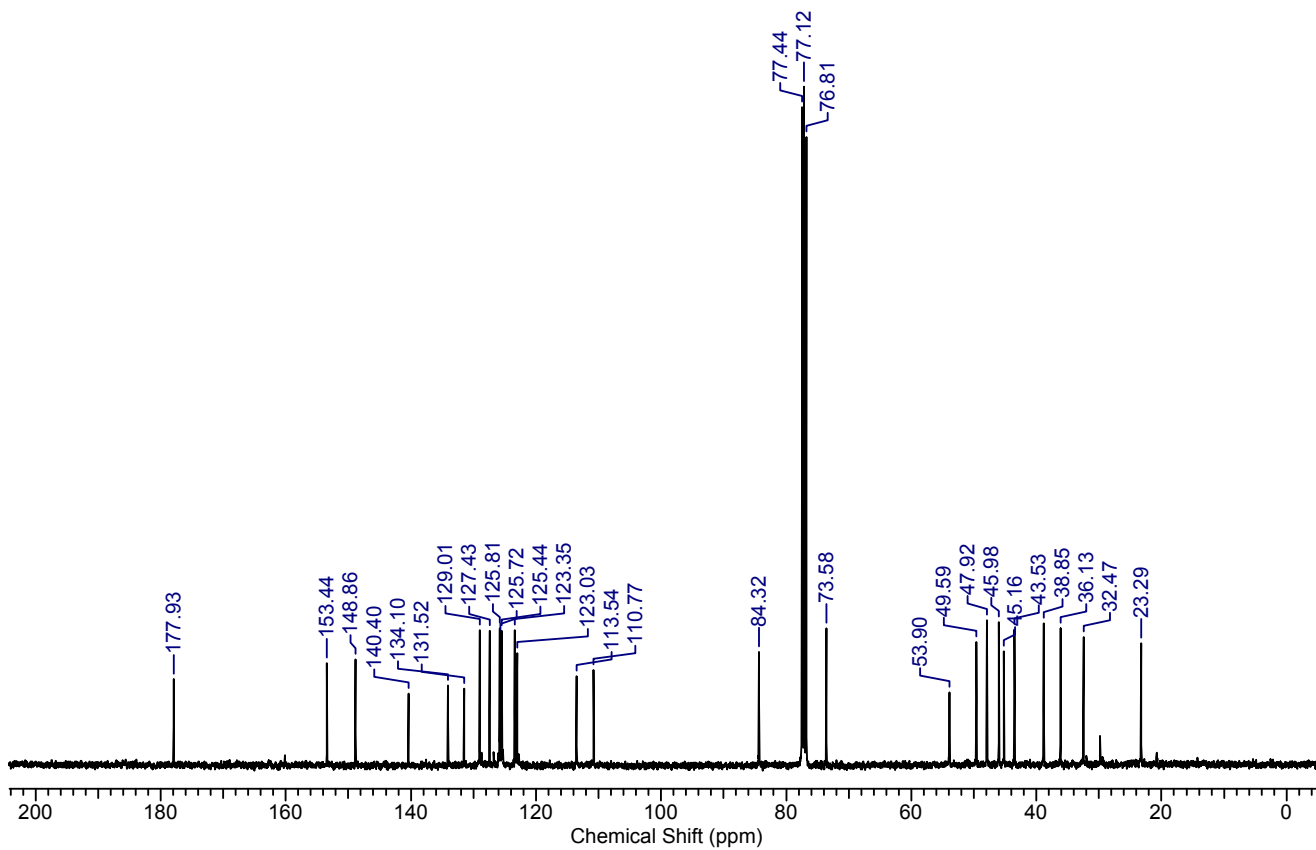

### DEPT of Compound 8 (100 MHz, CDCl<sub>3</sub>)

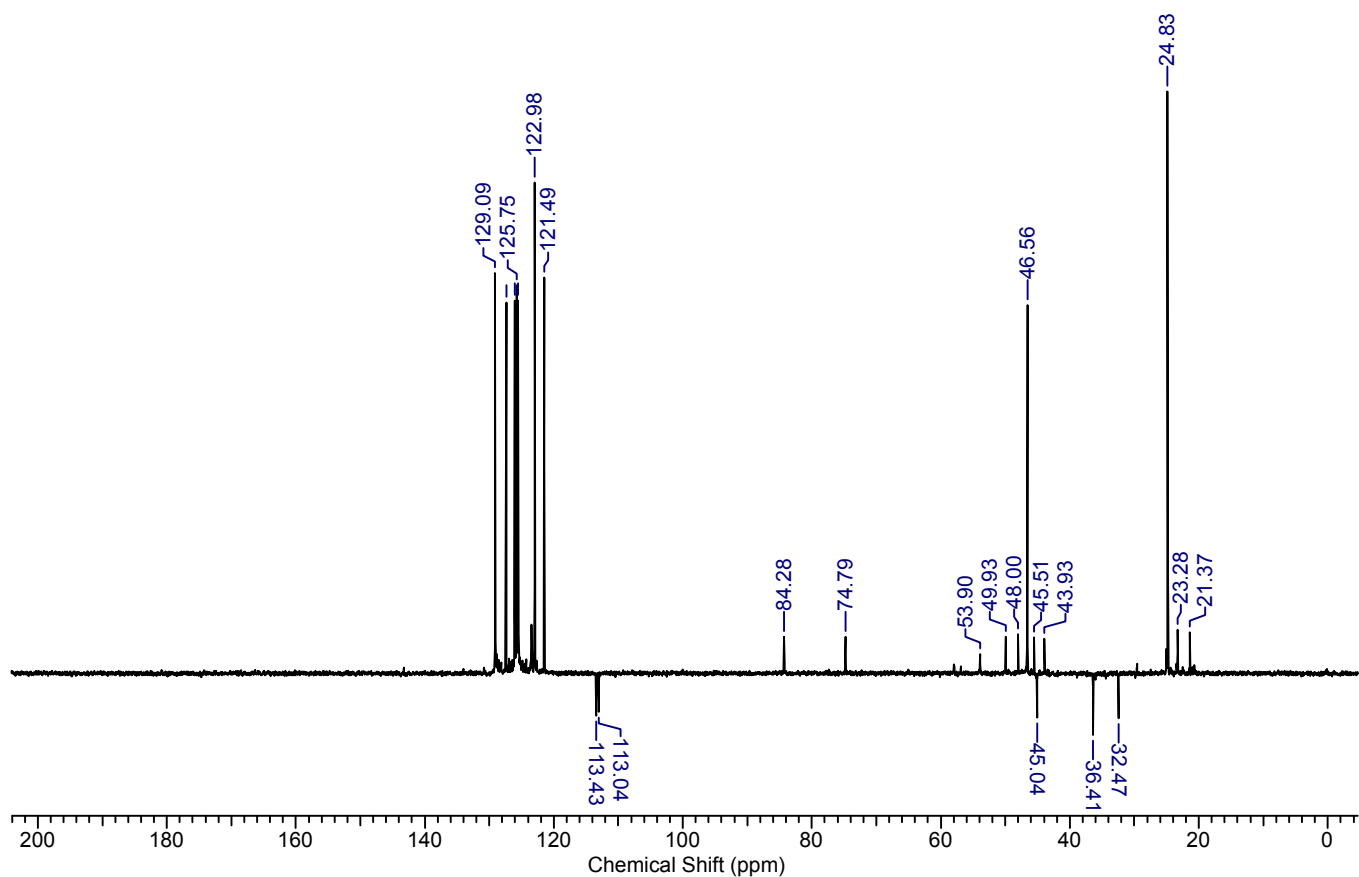

### LC-MS of Compound 8

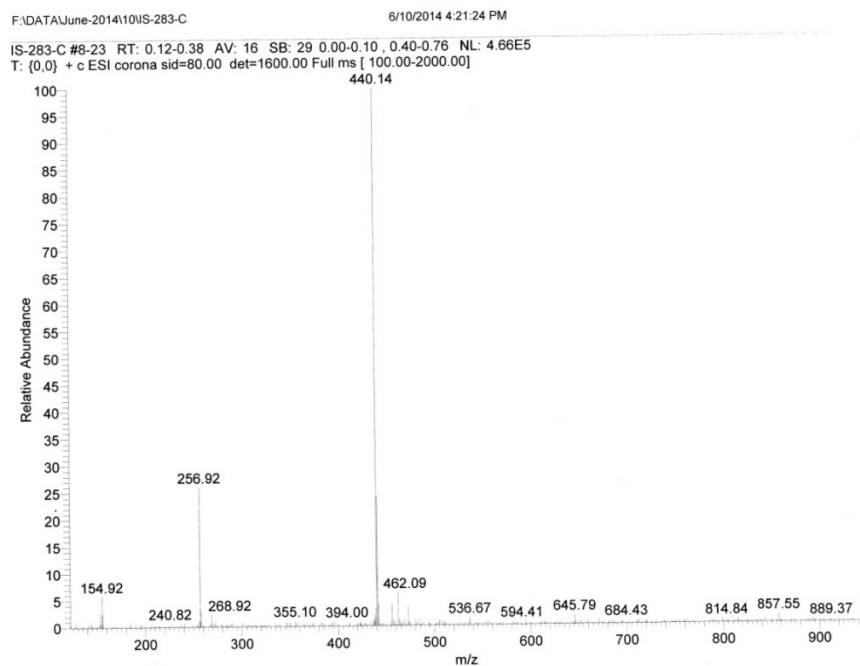

# HR-MS of Compound 8

IS-283-C #475 RT: 2.11 AV: 1 NL: 2.82E9  
T: FTMS + p ESI Full ms [60.00-900.00]

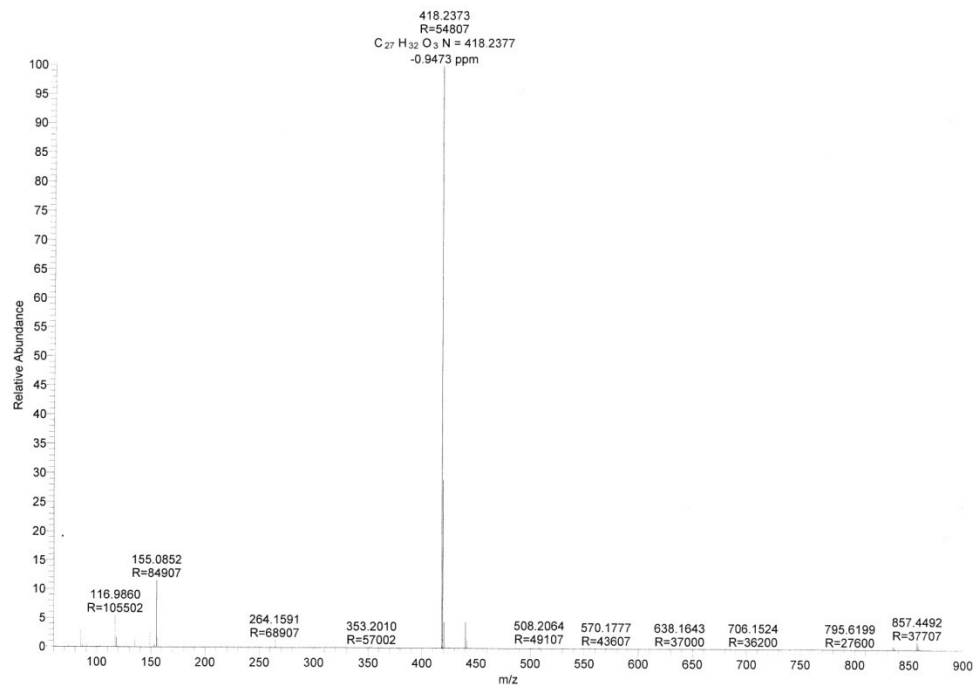

# <sup>1</sup>H NMR of Compound 9 (400 MHz, CDCl<sub>3</sub>)

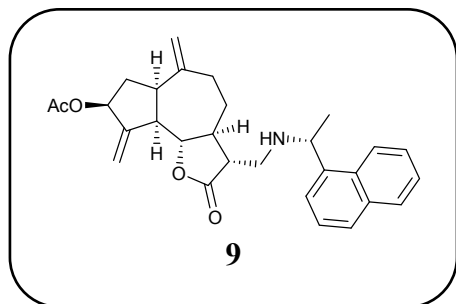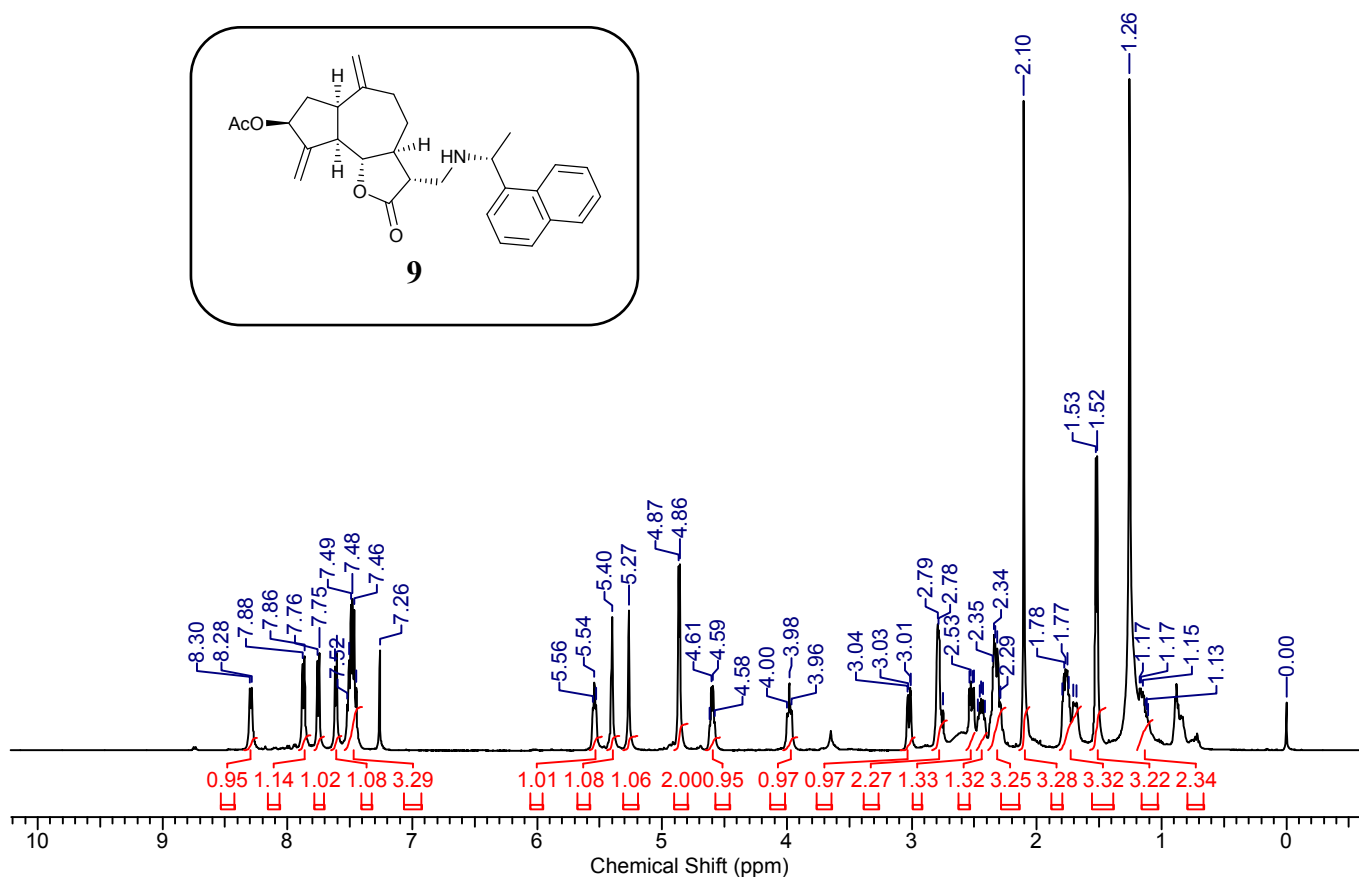

### <sup>13</sup>C NMR of Compound 9 (100 MHz, CDCl<sub>3</sub>)

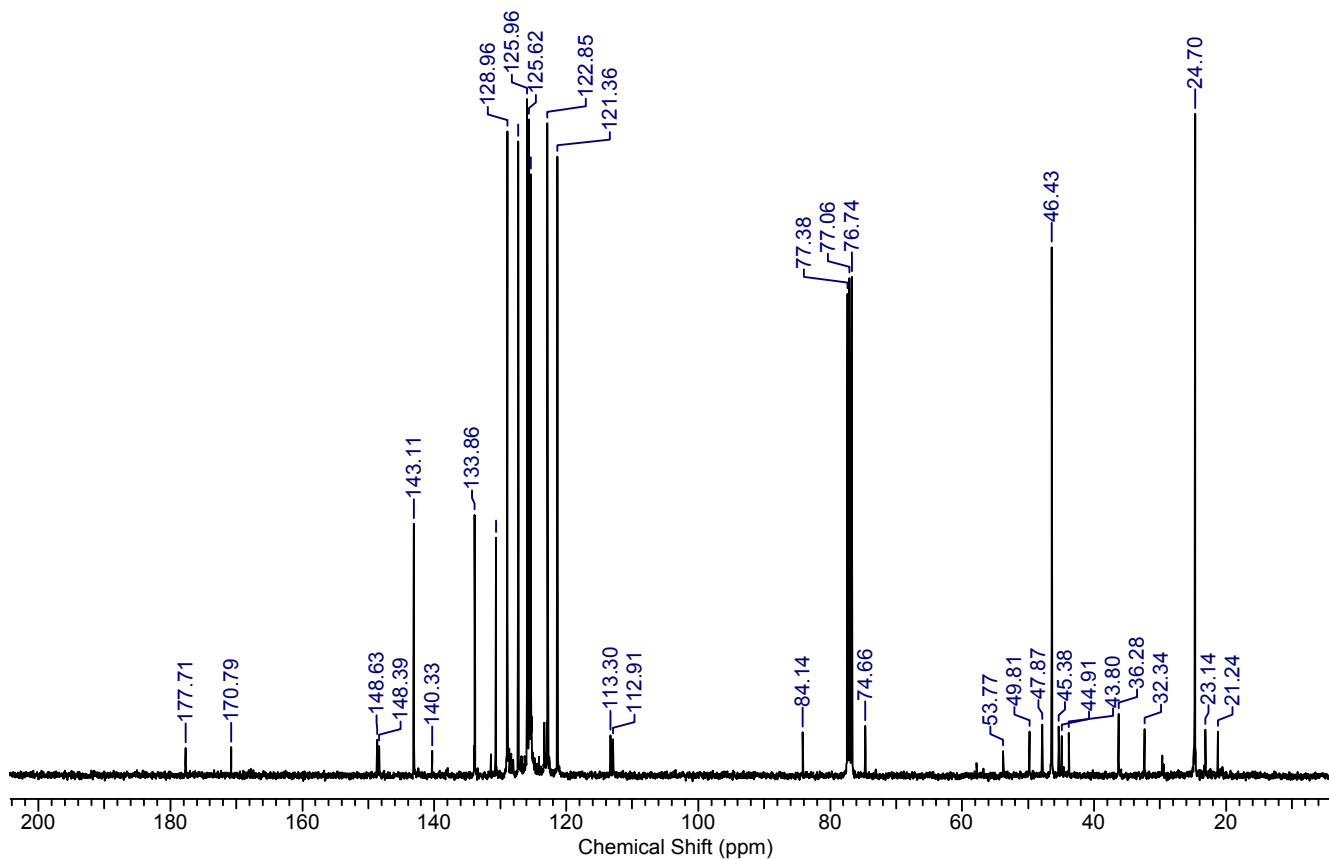

### LC-MS of Compound 9

F:\DATA\June-2014\12\IS-293-a

6/12/2014 4:33:22 PM

IS-293-a #12 RT: 0.19 AV: 1 SB: 27 0.00-0.12, 0.42-0.73 NL: 3.06E5  
T: {0,0} + c ESI corona sid=80.00 det=1600.00 Full ms [ 100.00-2000.00]

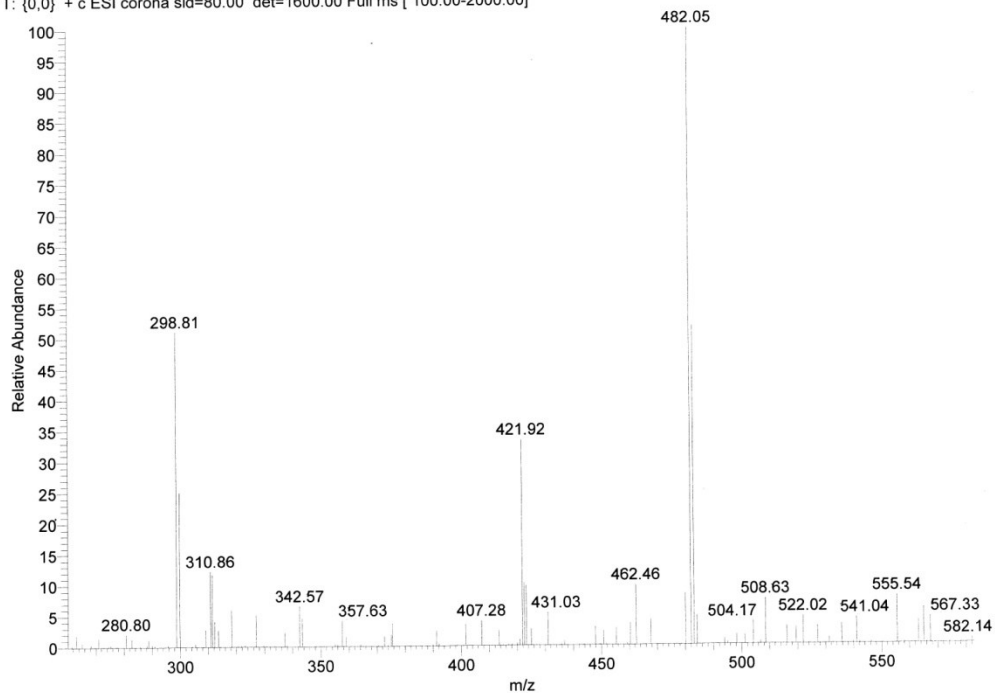



# HR-MS of Compound 9

IS-293-A #89 RT: 0.39 AV: 1 NL: 6.82E9  
T: FTMS + p ESI Full ms [100.00-1500.00]

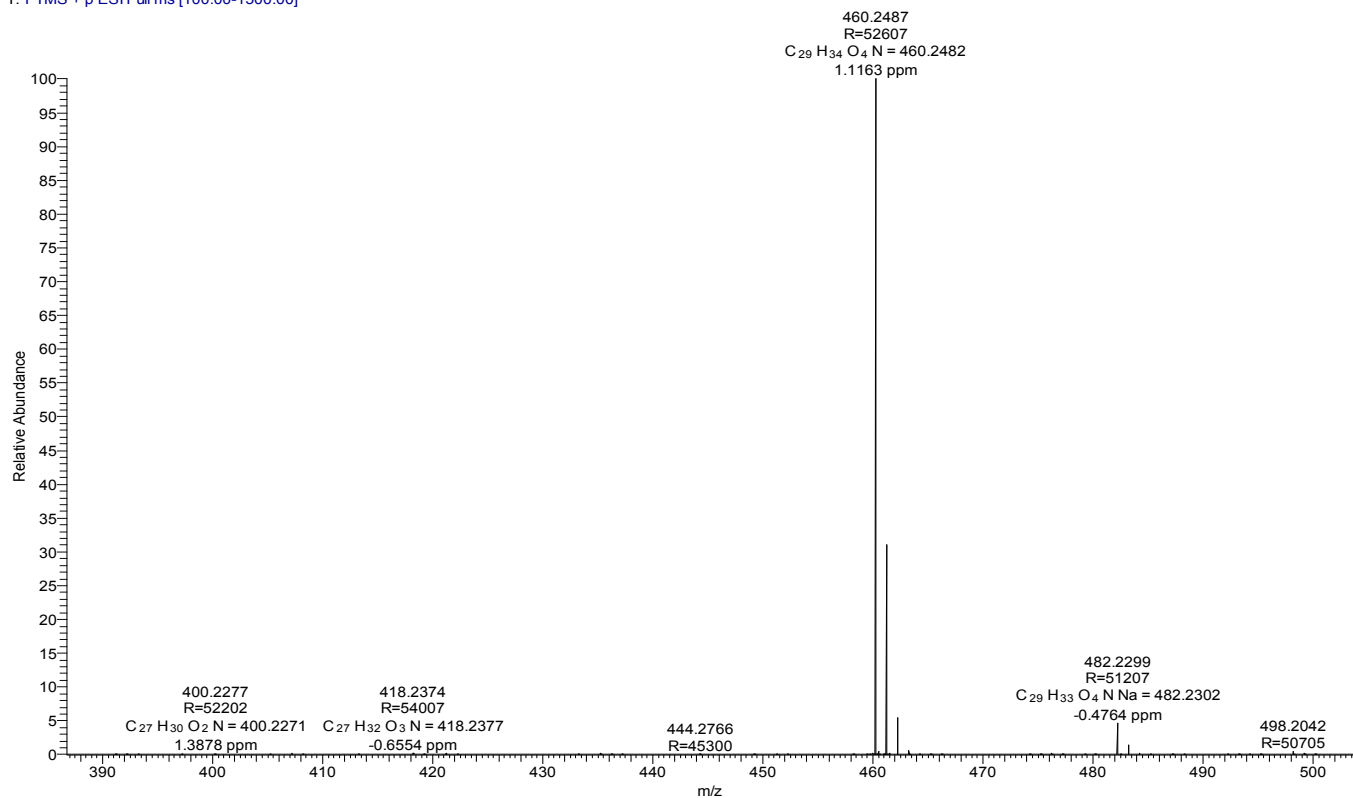

# <sup>1</sup>H NMR of Compound 10 (400 MHz, CDCl<sub>3</sub>)

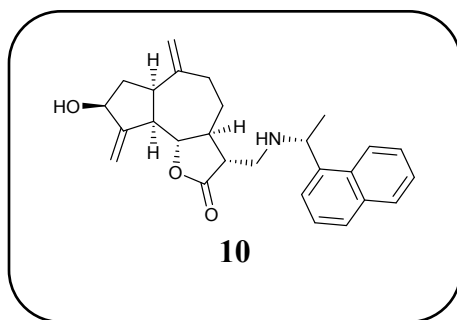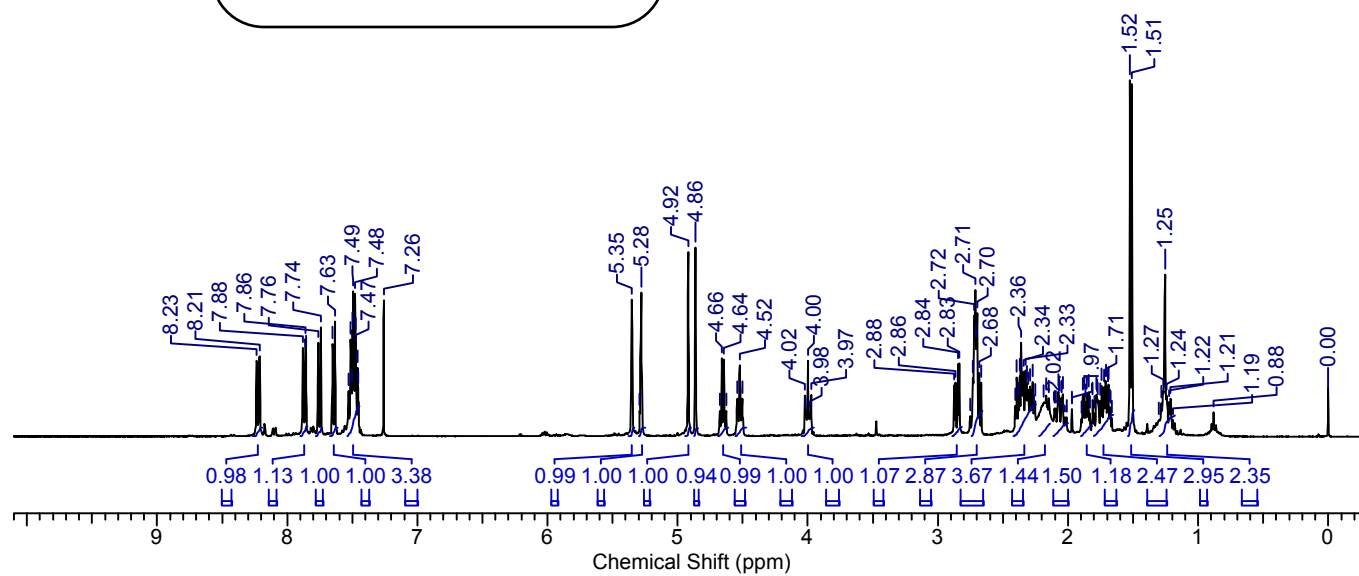

### <sup>13</sup>C NMR of Compound 10 (100 MHz, CDCl<sub>3</sub>)

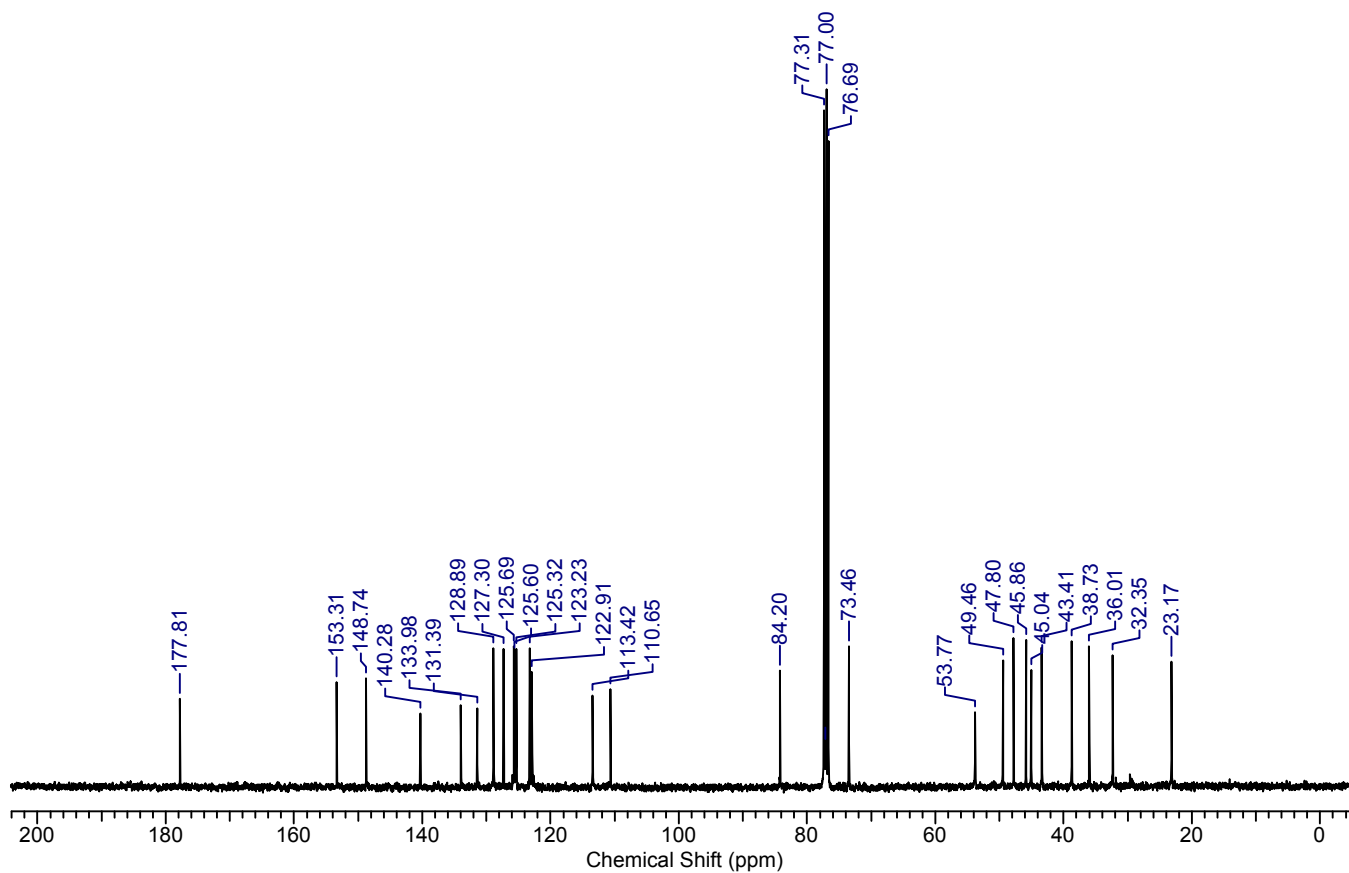

### LC-MS of Compound 10

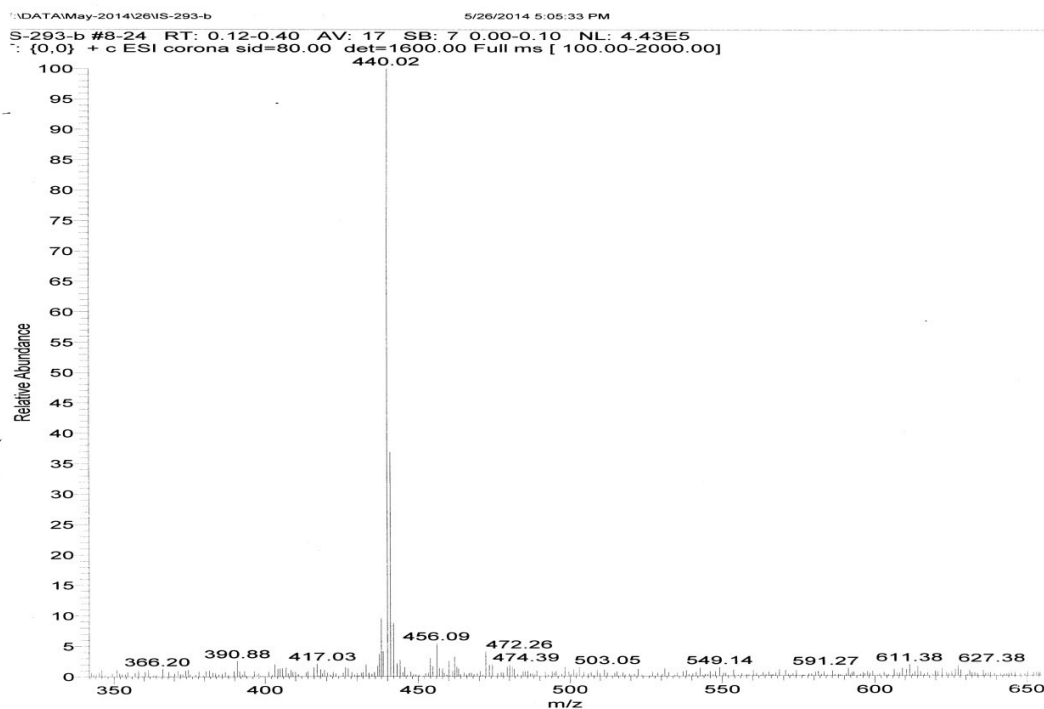

# HR-MS of Compound 10

IS-293-B #87 RT: 0.38 AV: 1 NL: 2.43E9  
T: FTMS + p ESI Full ms [100.00-1500.00]

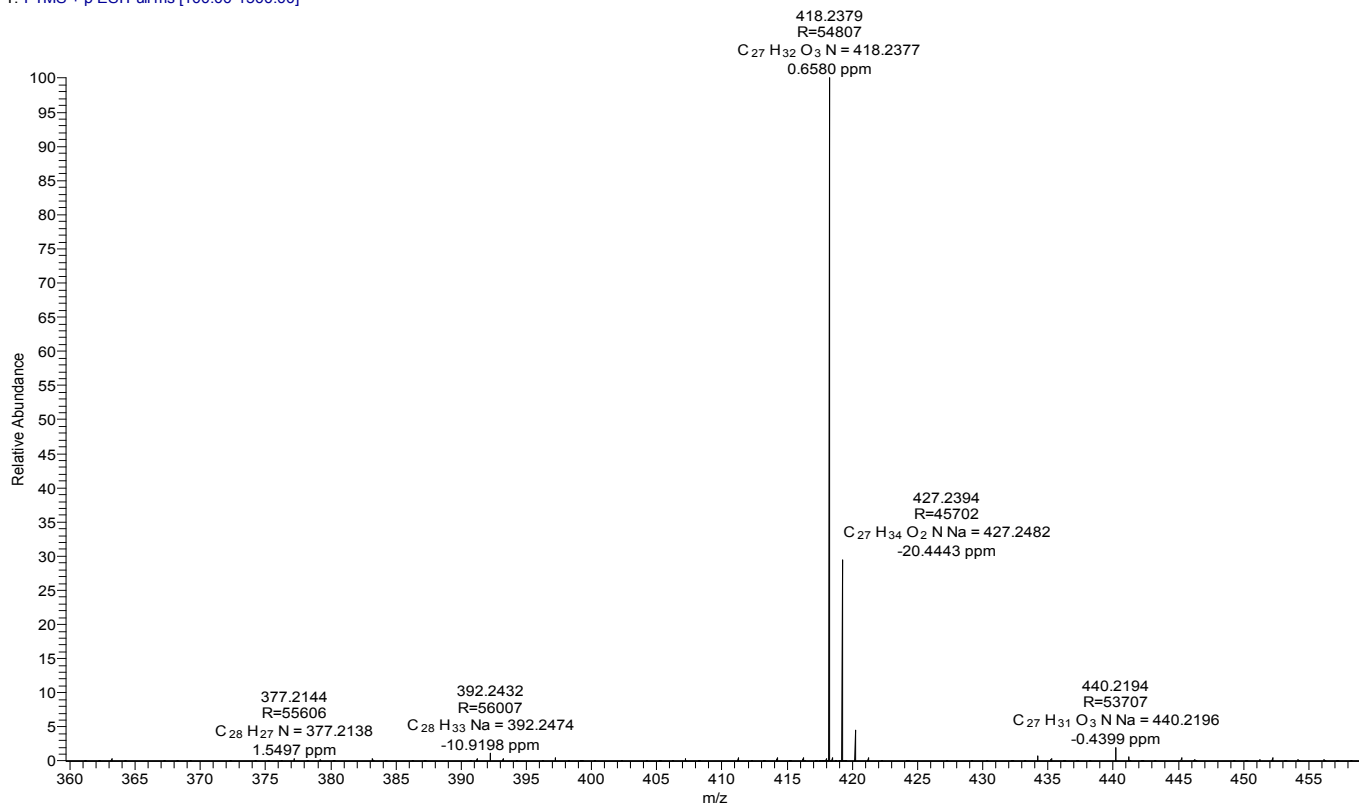

# <sup>1</sup>H NMR of Compound 11 (400 MHz, CDCl<sub>3</sub>)

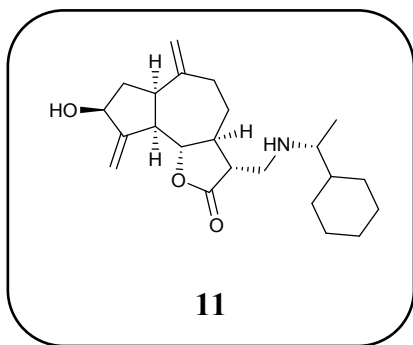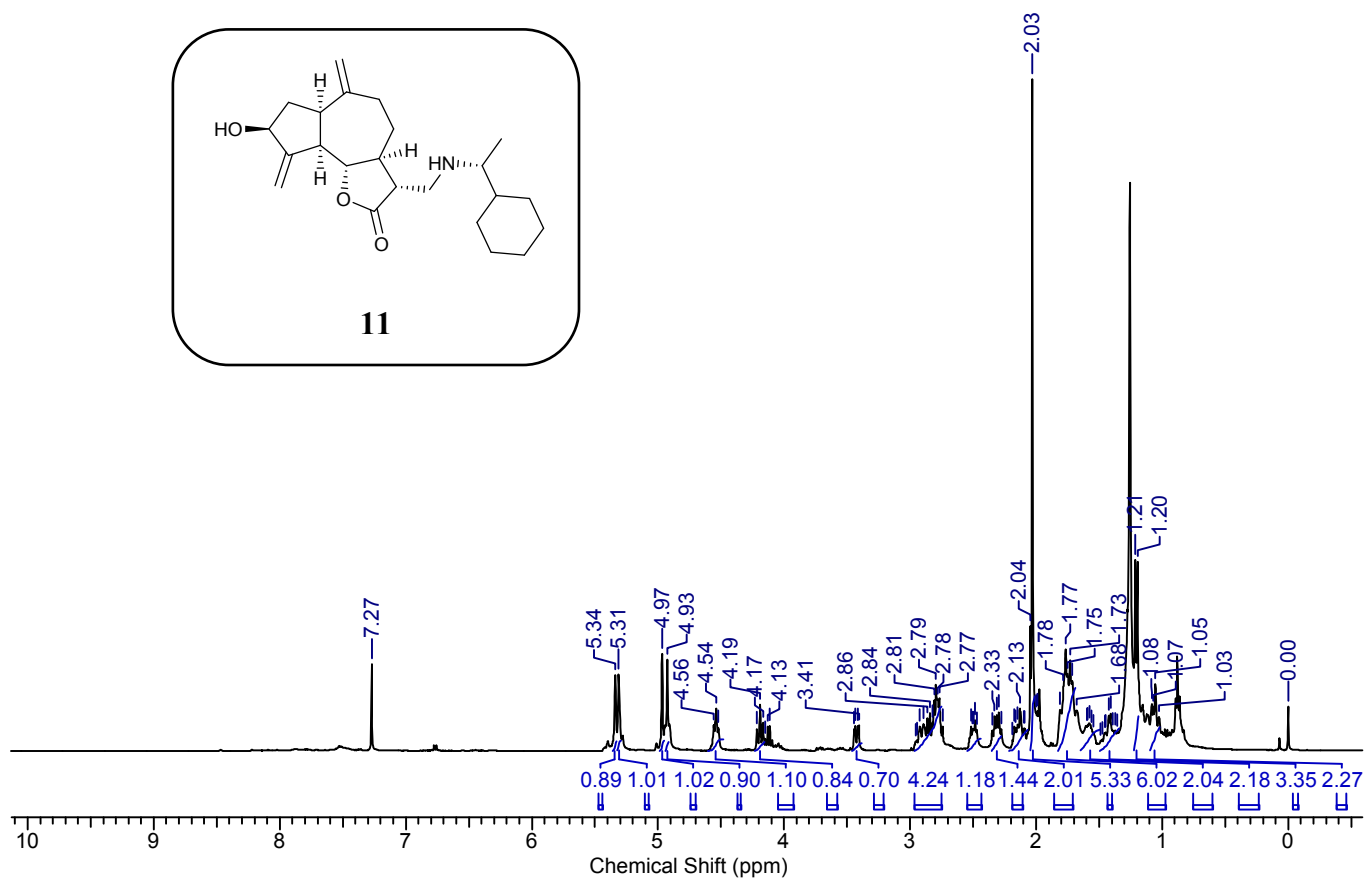

**$^{13}\text{C}$  NMR of Compound 11 (100 MHz,  $\text{CDCl}_3$ )**

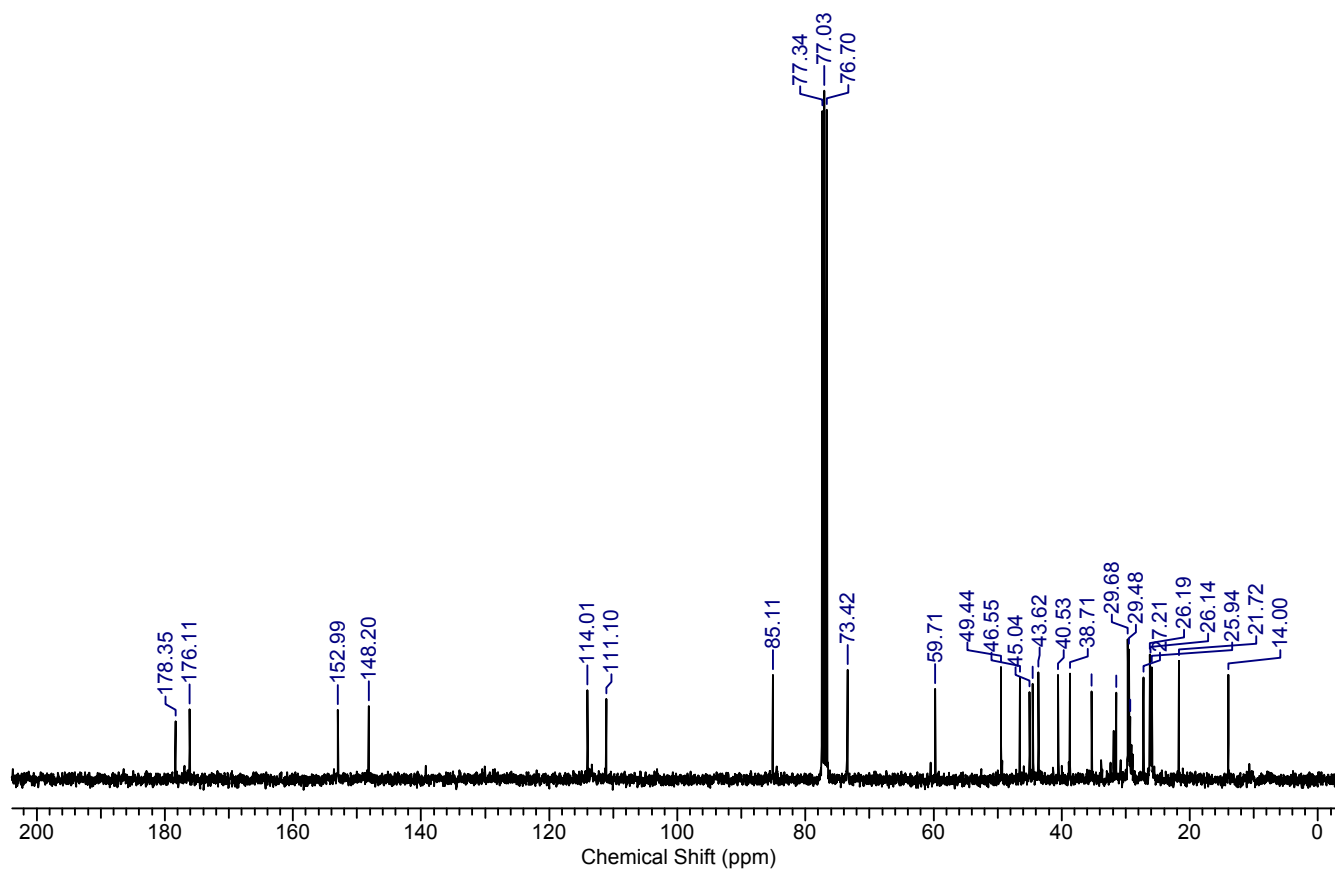

**DEPT of Compound 11 (100 MHz,  $\text{CDCl}_3$ )**

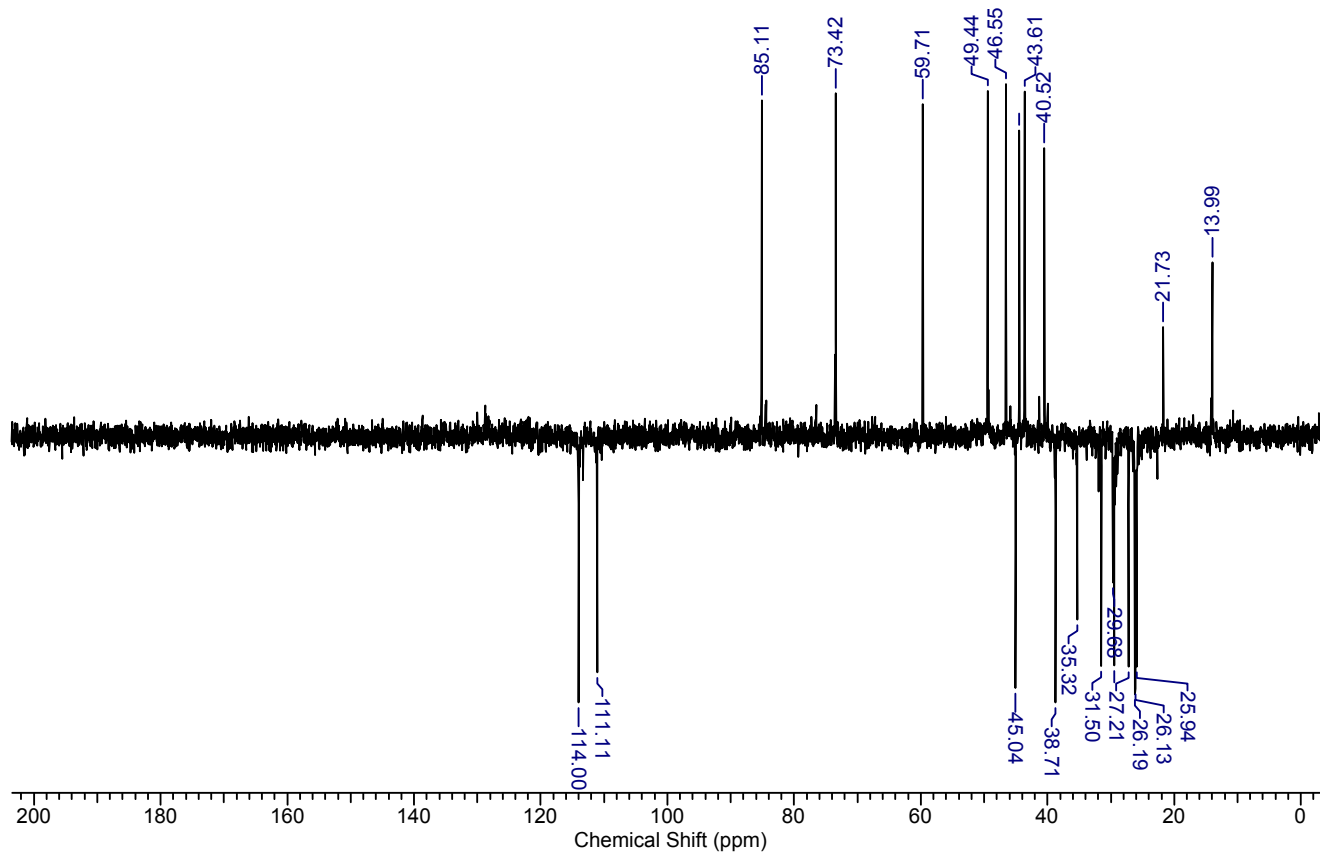

# LC-MS of Compound 11

F:\DATA\June-2014\10\IS-286

6/10/2014 4:25:33 PM

IS-286 #8-21 RT: 0.12-0.35 AV: 14 SB: 31 0.00-0.12 , 0.36-0.75 NL: 6.05E5  
T: {0,0} + c ESI corona sid=80.00 det=1600.00 Full ms [ 100.00-2000.00]

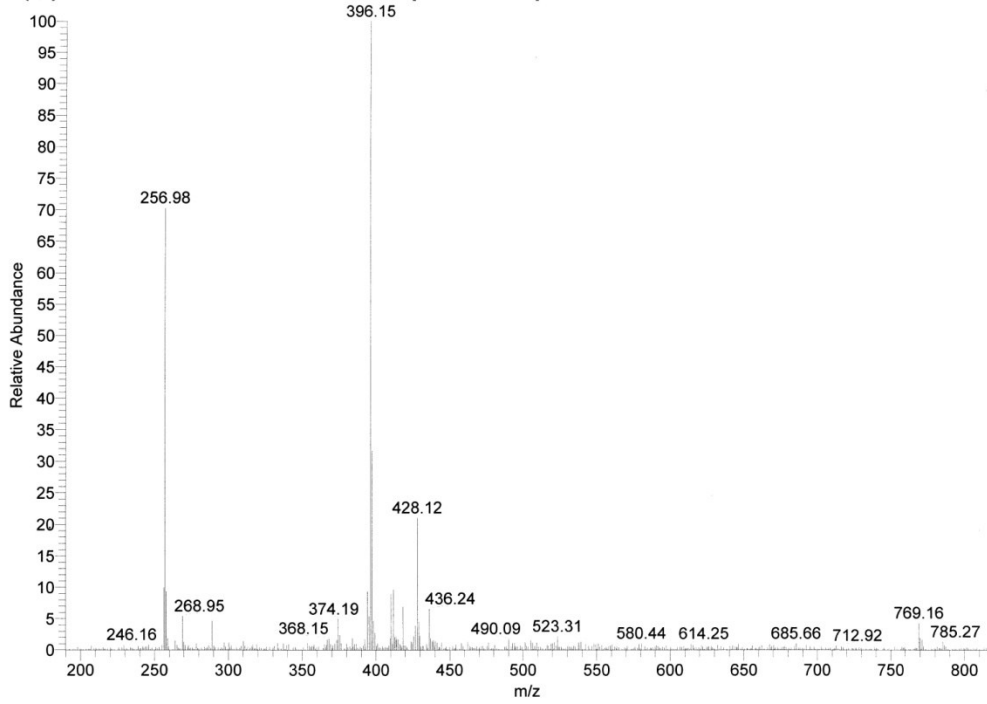

# HR-MS of Compound 11

D:\Data\IS-286

8/14/2014 1:18:27 PM

IS-286 #472 RT: 2.10 AV: 1 NL: 1.58E9  
T: FTMS + p ESI Full ms [60.00-900.00]

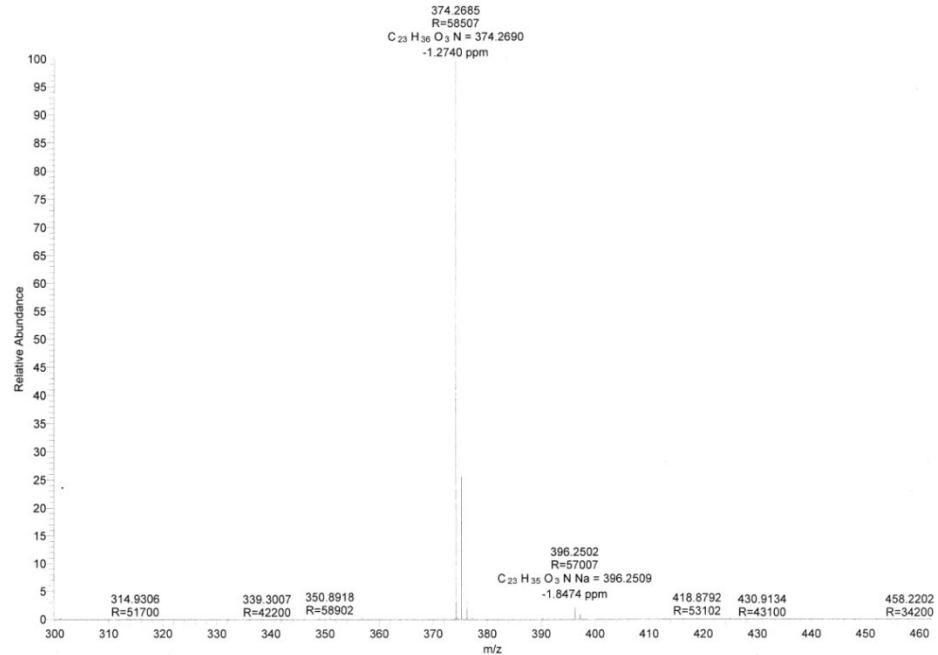

### <sup>1</sup>H NMR of Compound 12 (500 MHz, CDCl<sub>3</sub>)

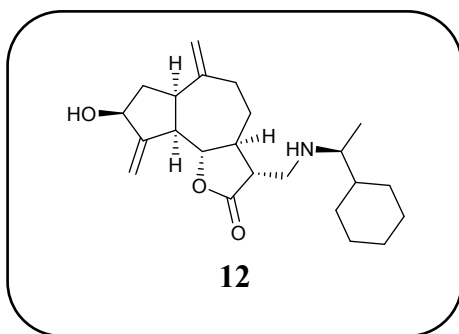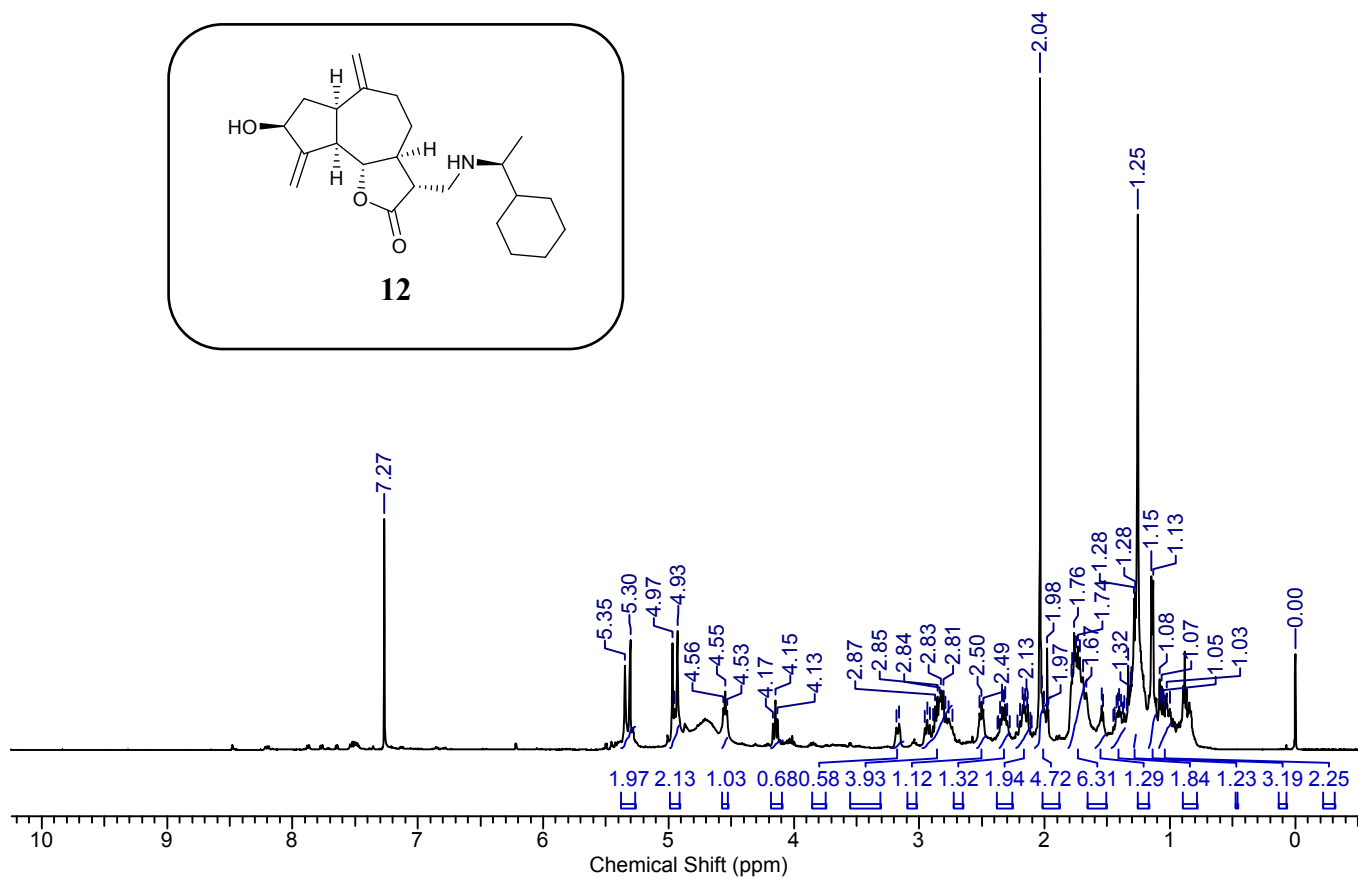

### <sup>13</sup>C NMR of Compound 12 (125 MHz, CDCl<sub>3</sub>)

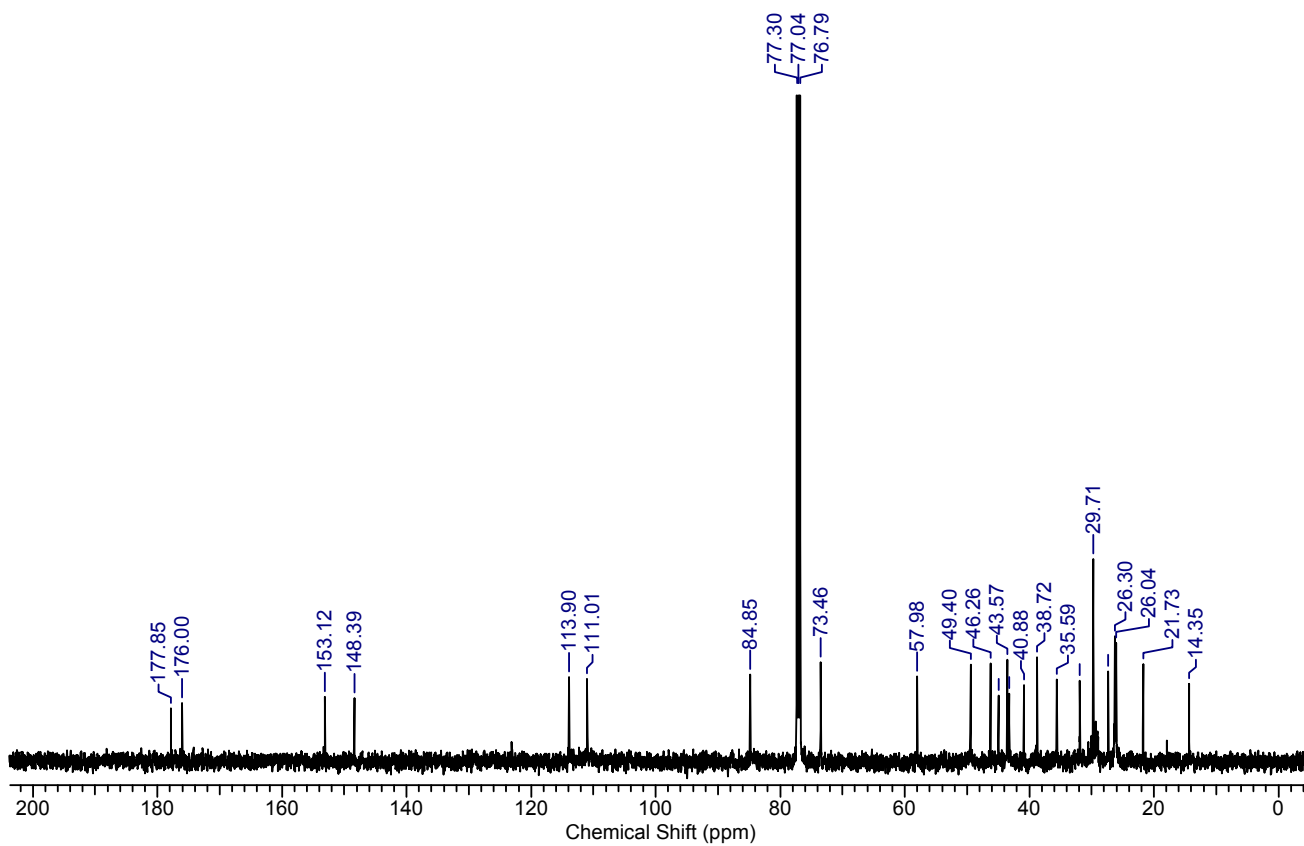

### DEPT of Compound 12 (125 MHz, CDCl<sub>3</sub>)

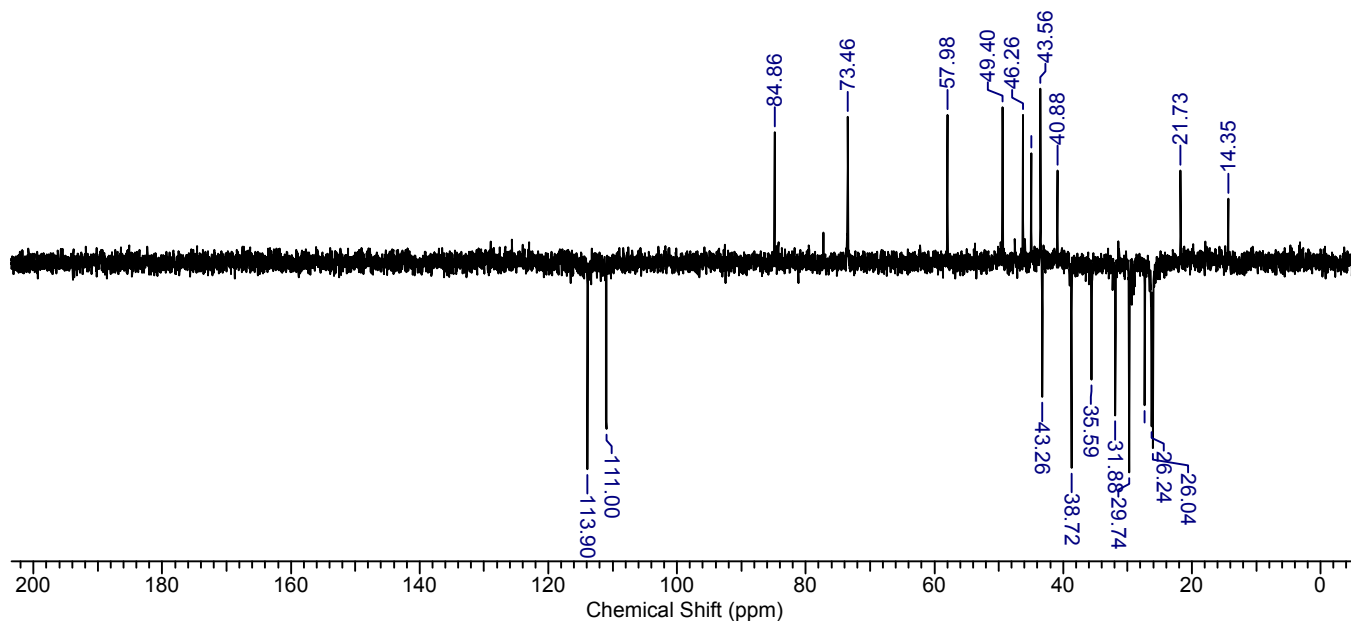

### LC-MS of Compound 12

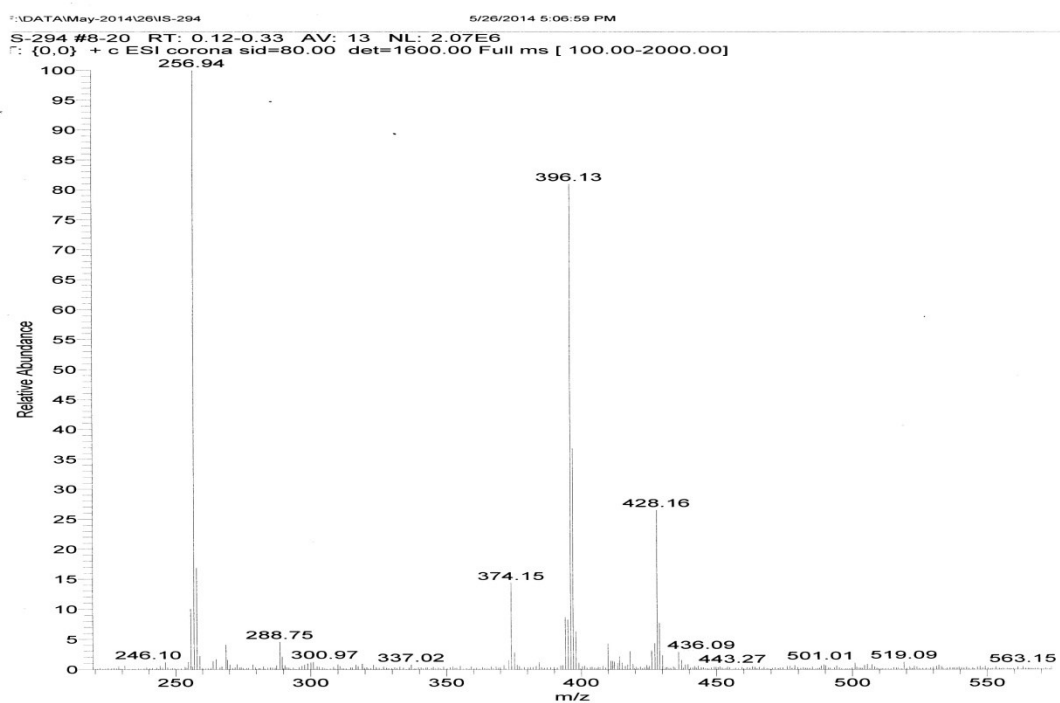

# HR-MS of Compound 12

IS-294-A #87 RT: 0.38 AV: 1 NL: 7.63E9  
T: FTMS + p ESI Full ms [100.00-1500.00]

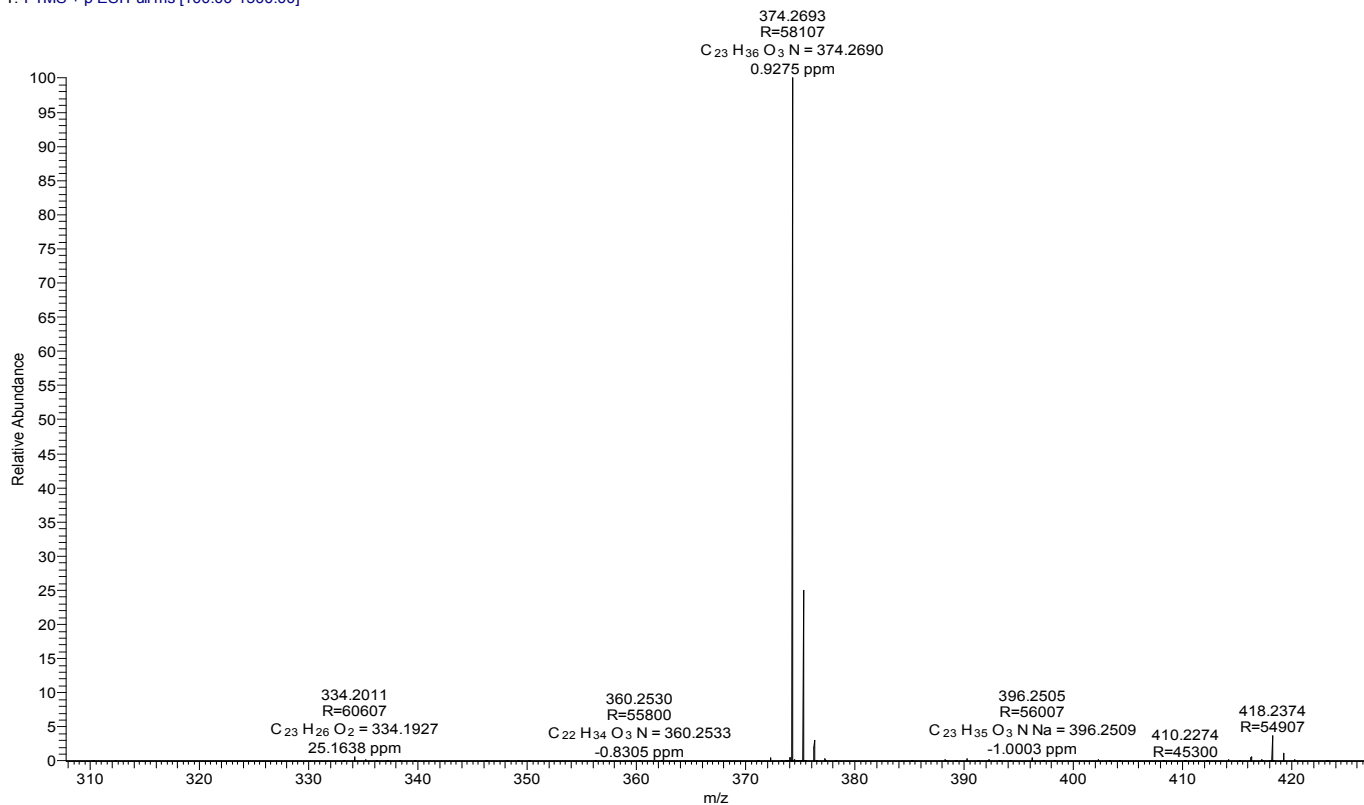

# <sup>1</sup>H NMR of Compound 13 (400 MHz, CDCl<sub>3</sub>)

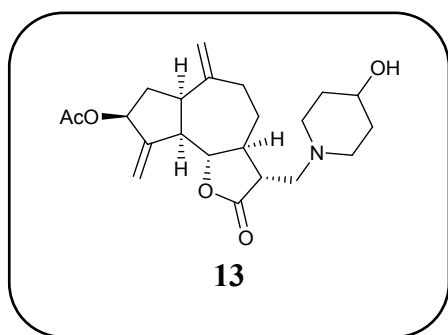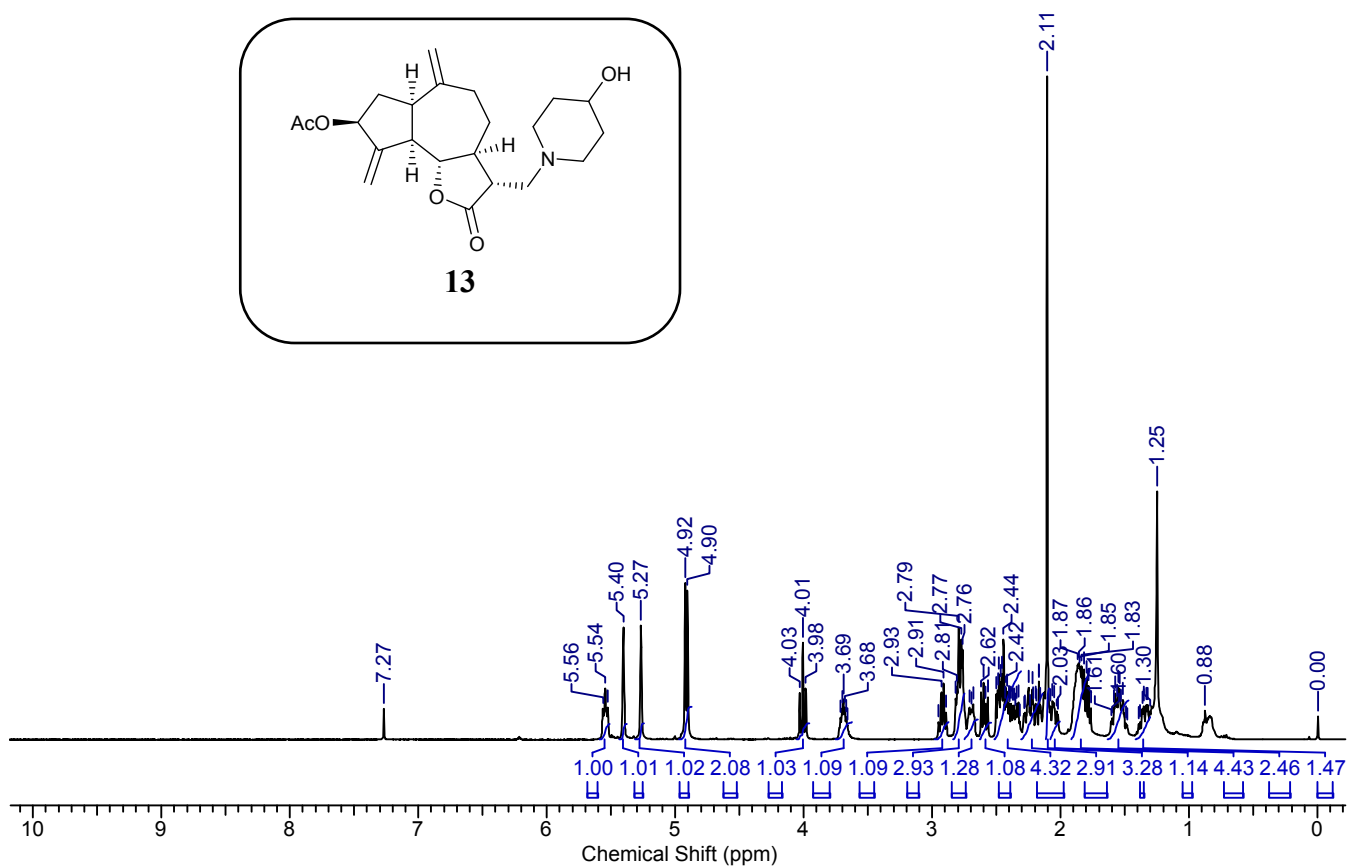



**$^{13}\text{C}$  NMR of Compound 13 (100 MHz,  $\text{CDCl}_3$ )**

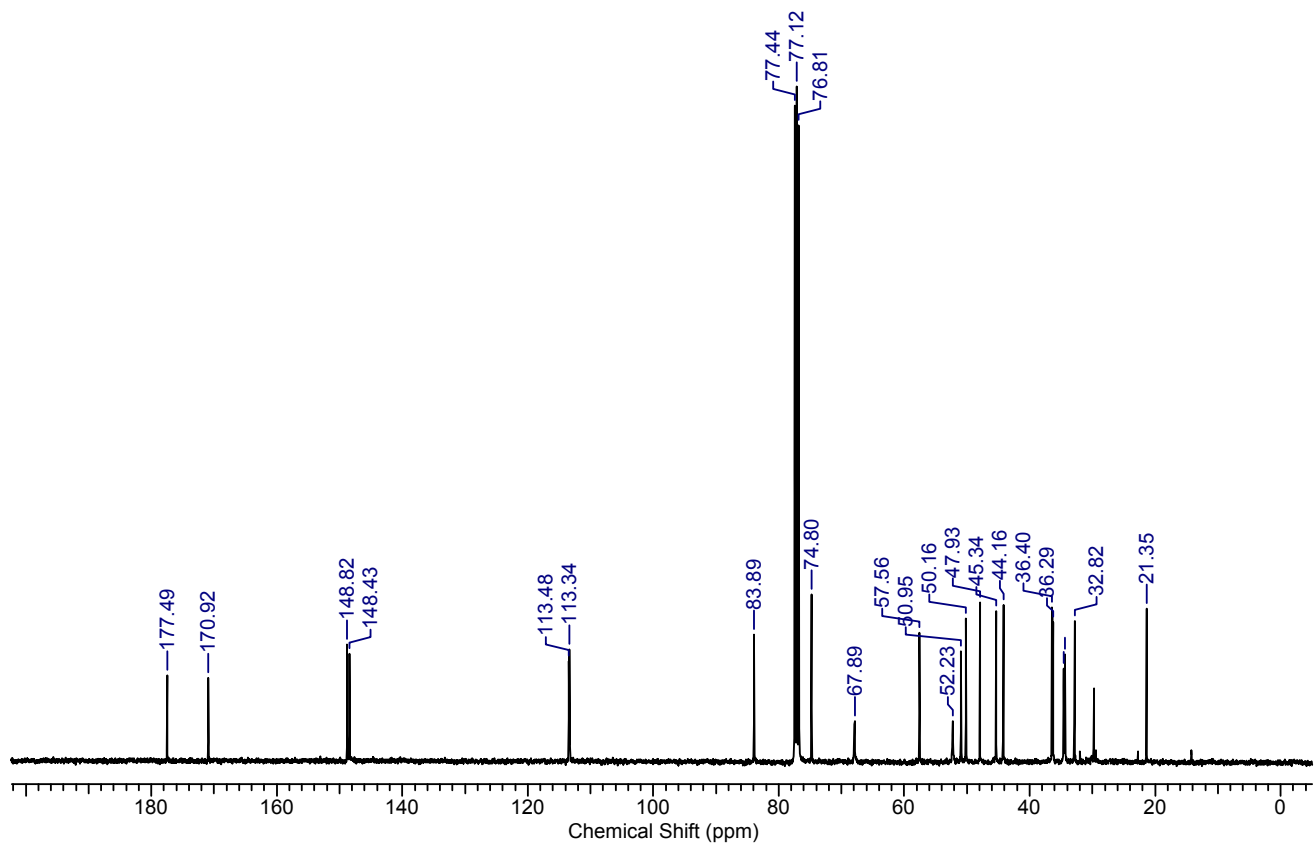

**DEPT of Compound 13 (100 MHz,  $\text{CDCl}_3$ )**

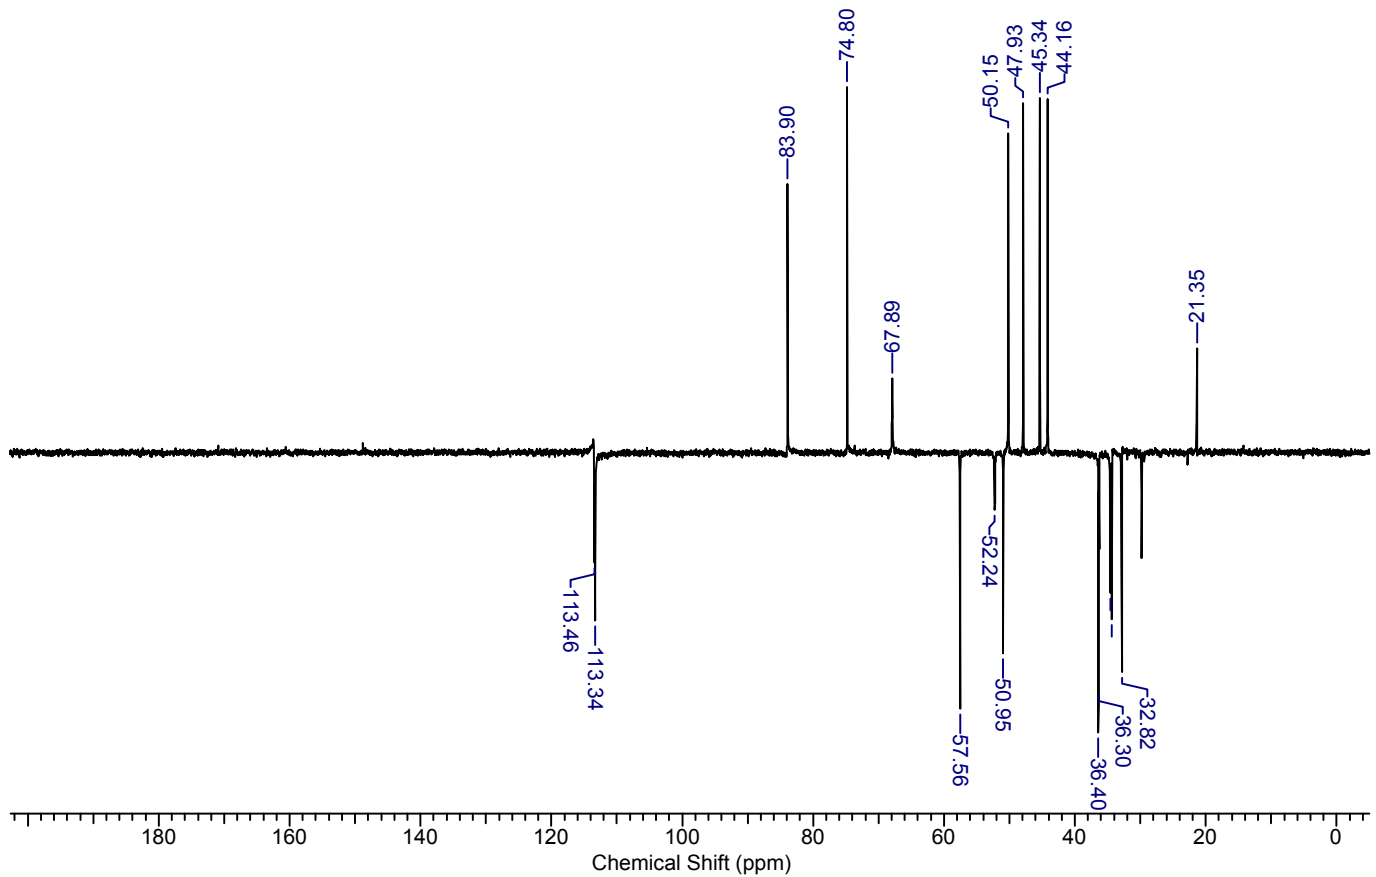

## LC-MS of Compound 13

F:\DATA\June-2014\10\IS-278-A

6/10/2014 4:20:00 PM

IS-278-A #8-24 RT: 0.12-0.40 AV: 17 SB: 28 0.00-0.14 , 0.35-0.66 NL: 1.14E6  
T: (0,0) + c ESI corona sid=80.00 det=1600.00 Full ms [ 100.00-2000.00]

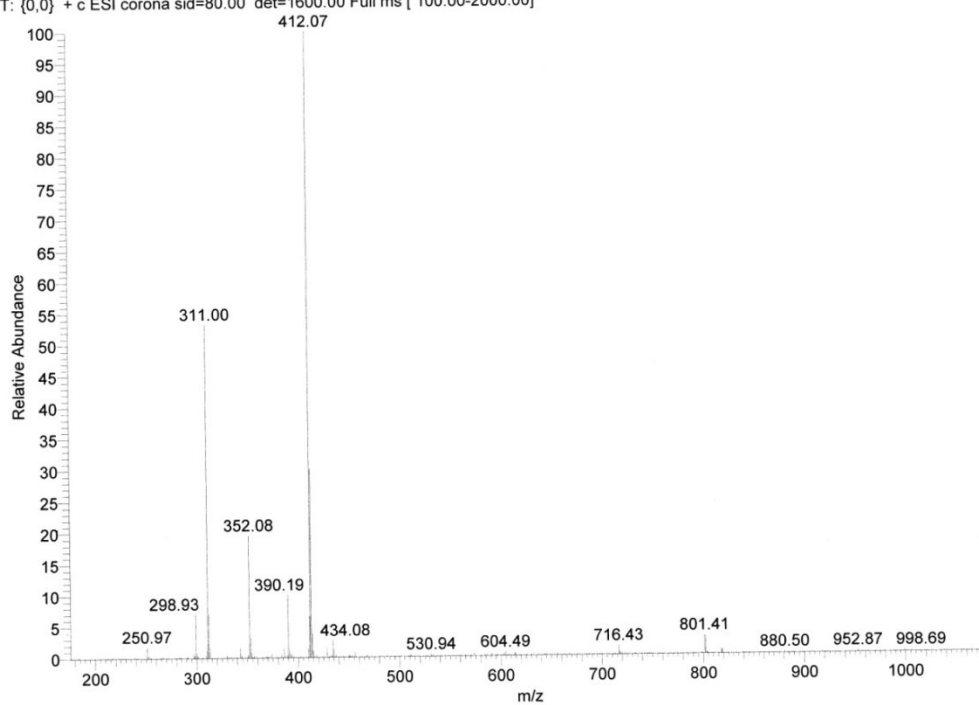

## HR-MS of Compound 13

D:\Data\IS-278-A

8/14/2014 12:33:47 PM

IS-278-A #469 RT: 2.09 AV: 1 NL: 1.34E9  
T: FTMS + p ESI Full ms [60.00-900.00]

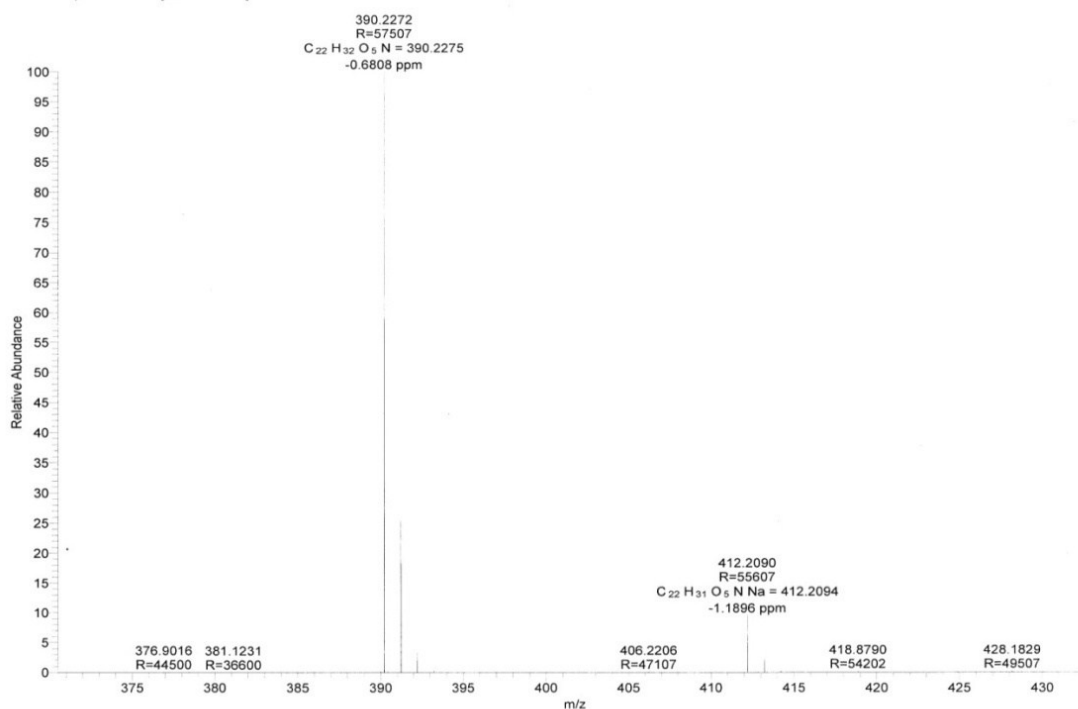

### <sup>1</sup>H NMR of Compound 14 (400 MHz, CDCl<sub>3</sub>)

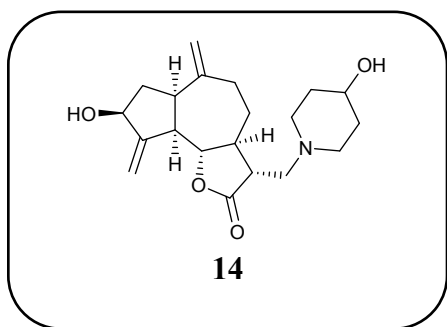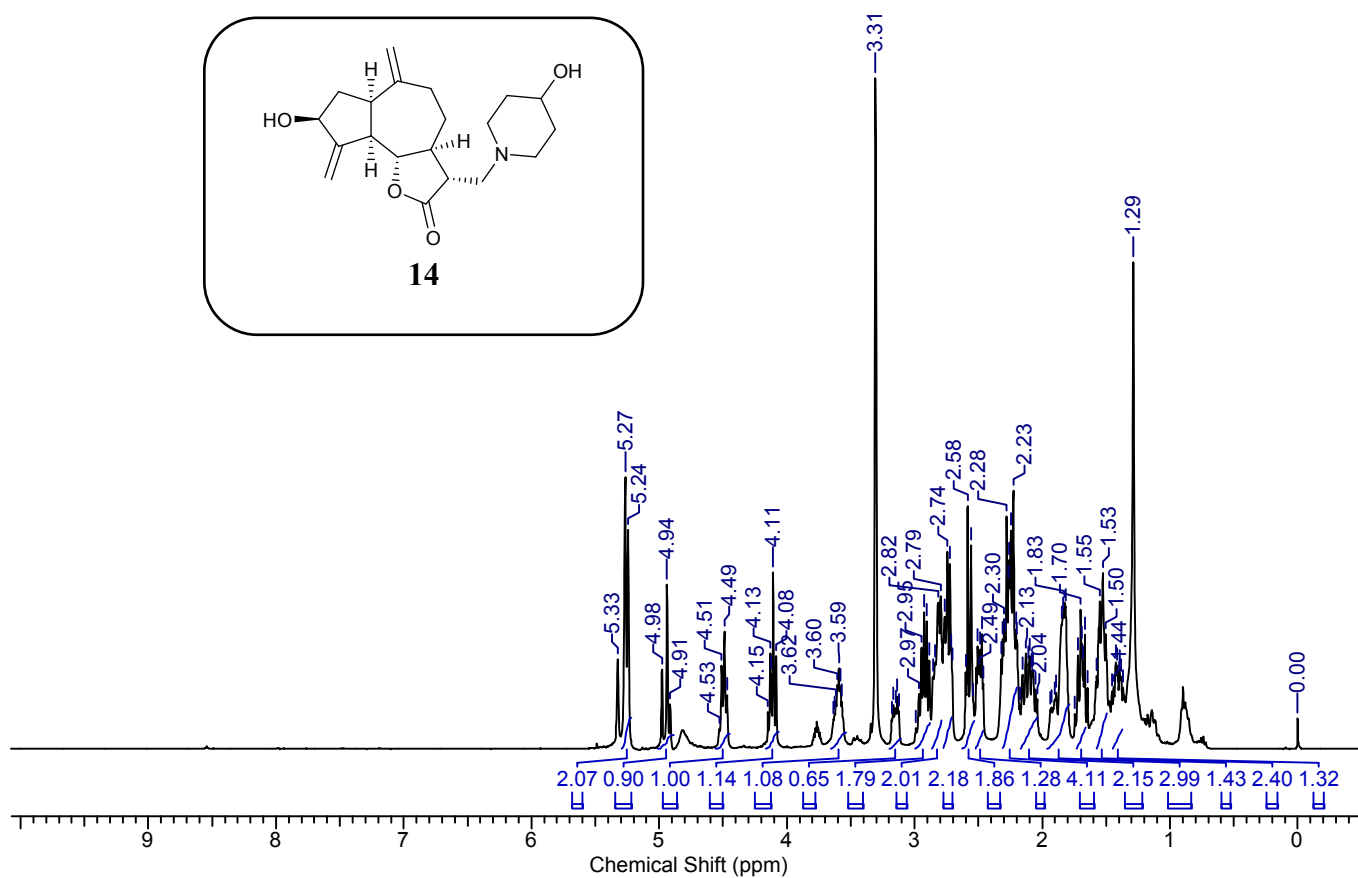

### <sup>13</sup>C NMR of Compound 14 (100 MHz, CDCl<sub>3</sub>)

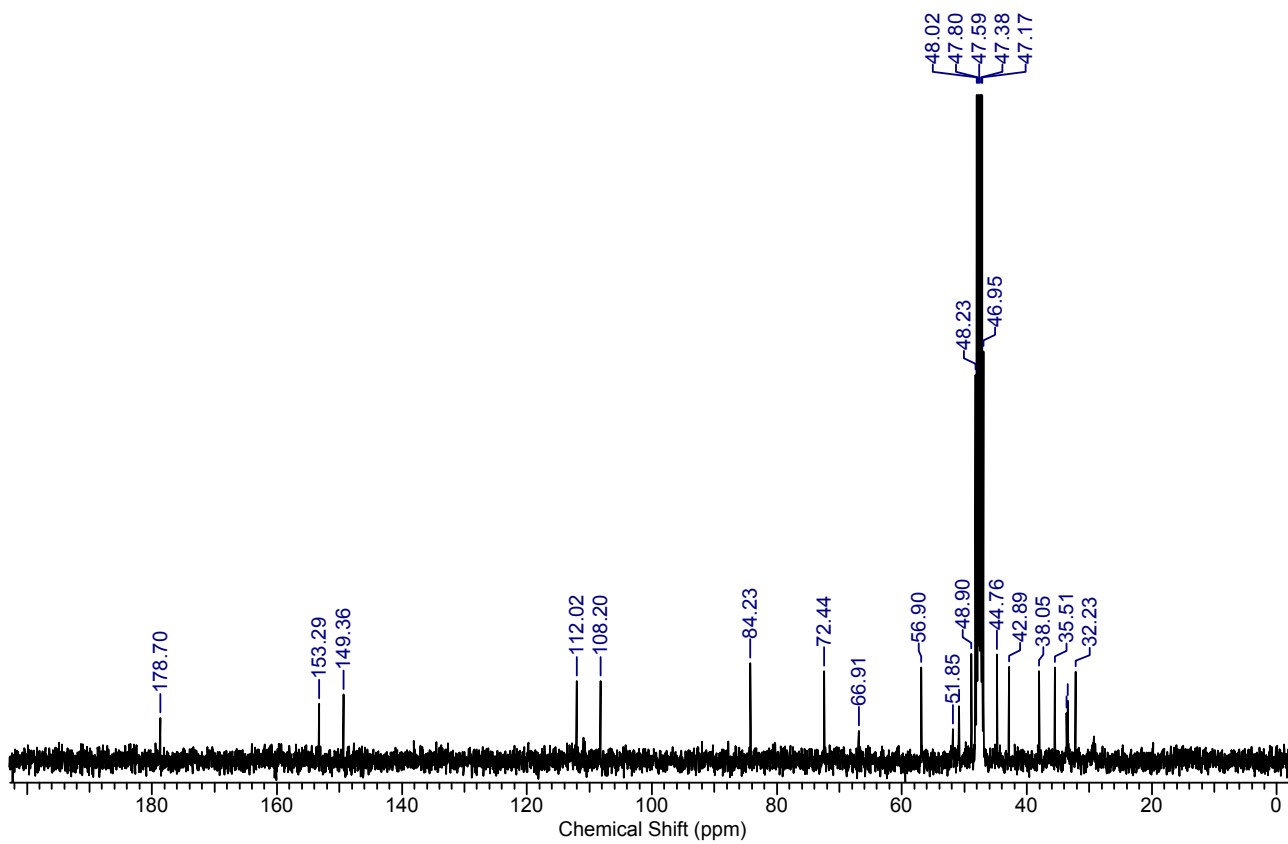

### DEPT of Compound 14 (100 MHz, CDCl<sub>3</sub>)

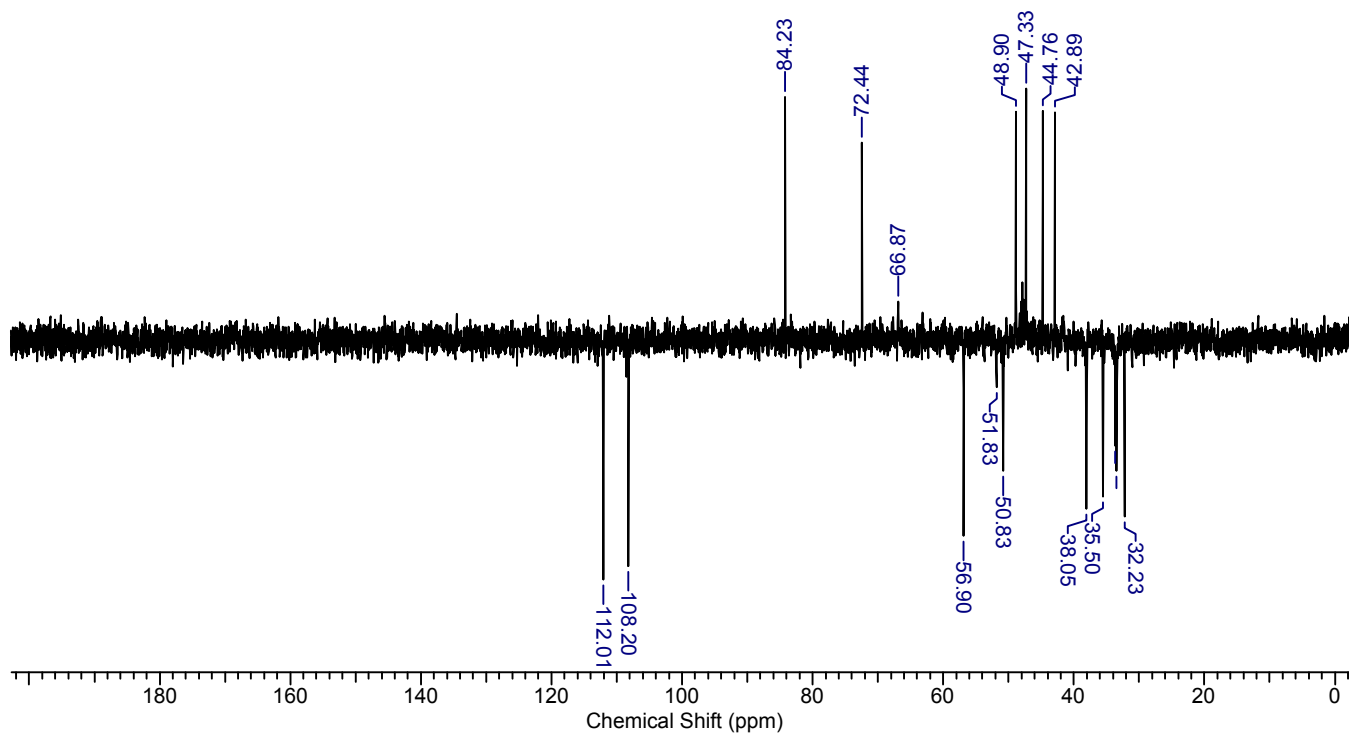

### LC-MS of Compound 14

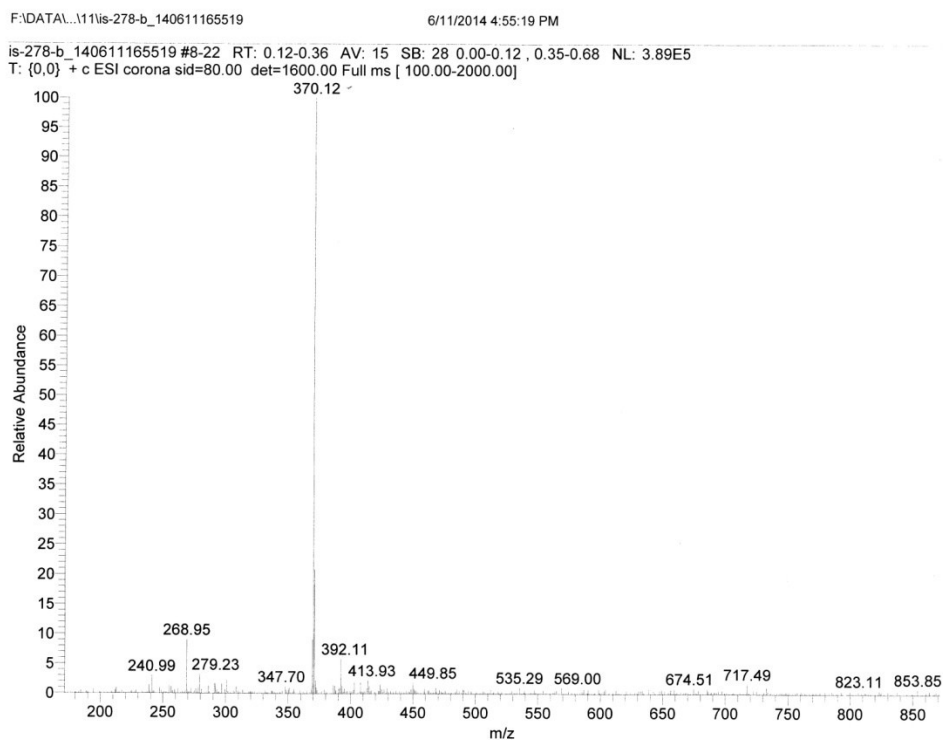

# HR-MS of Compound 14

IS-278-B #89 RT: 0.39 AV: 1 NL: 9.00E9  
T: FTMS + p ESI Full ms [100.00-1500.00]

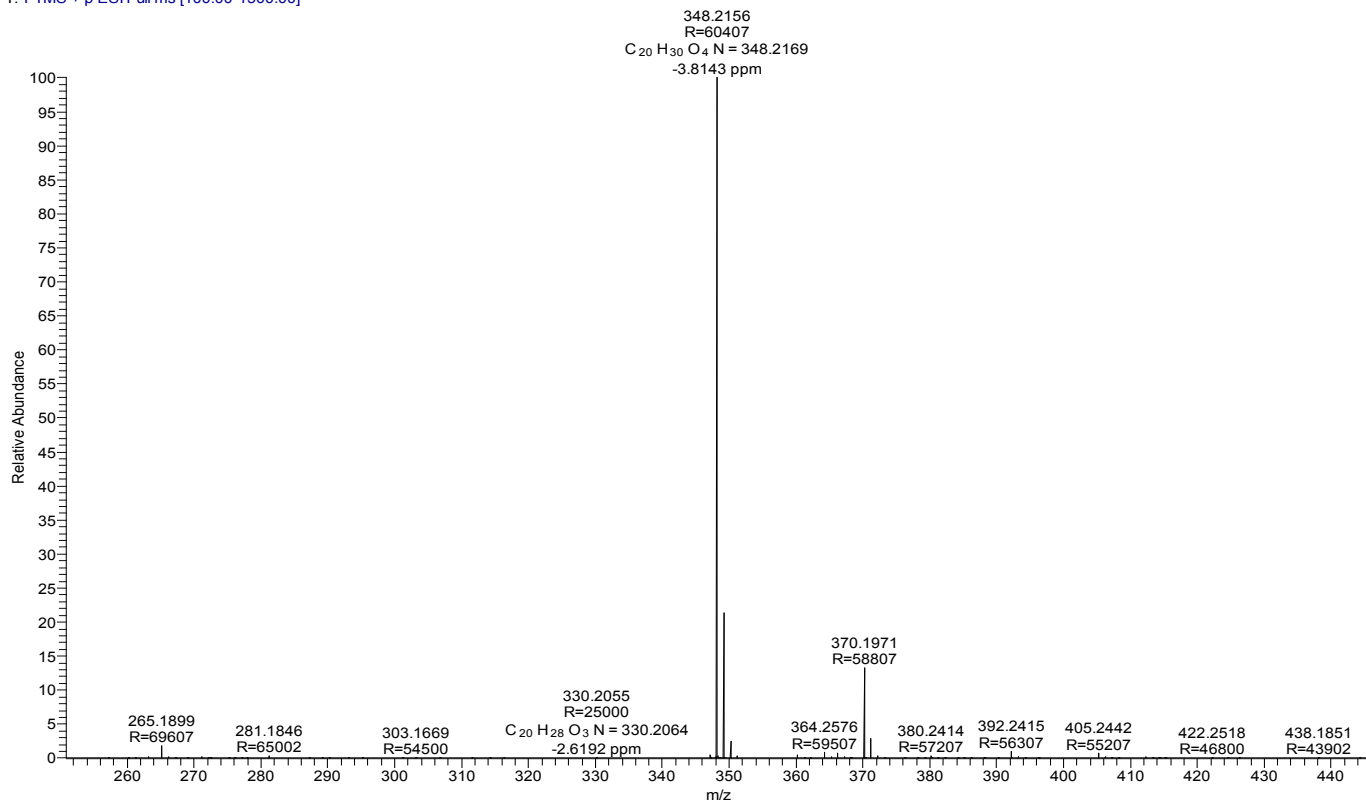

# <sup>1</sup>H NMR of Compound 15 (200 MHz, CDCl<sub>3</sub>)

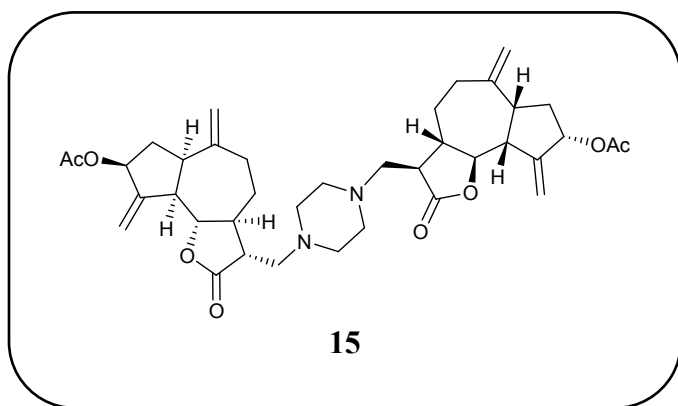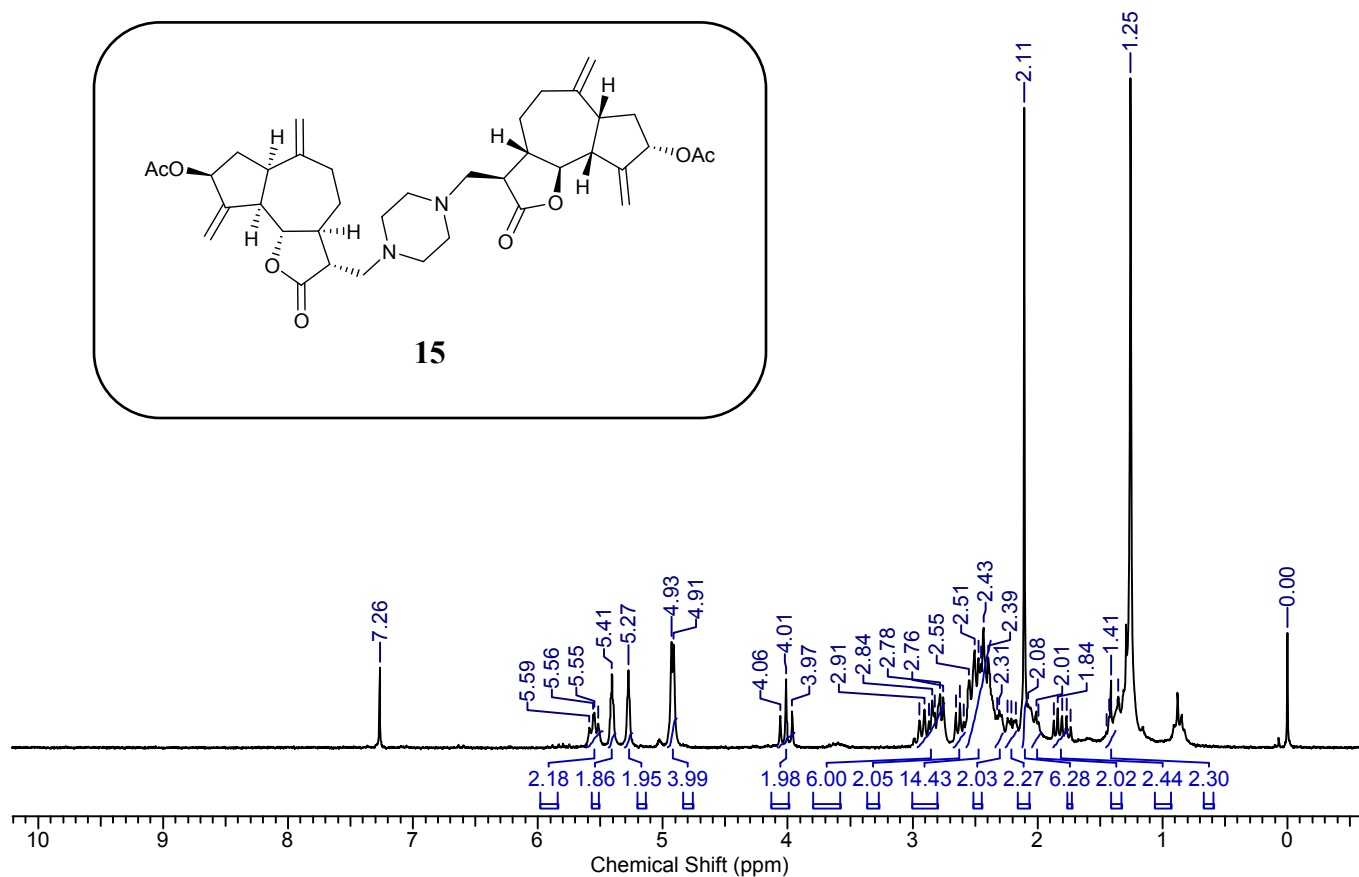

**<sup>13</sup>C NMR of Compound 15 (100 MHz, CDCl<sub>3</sub>)**

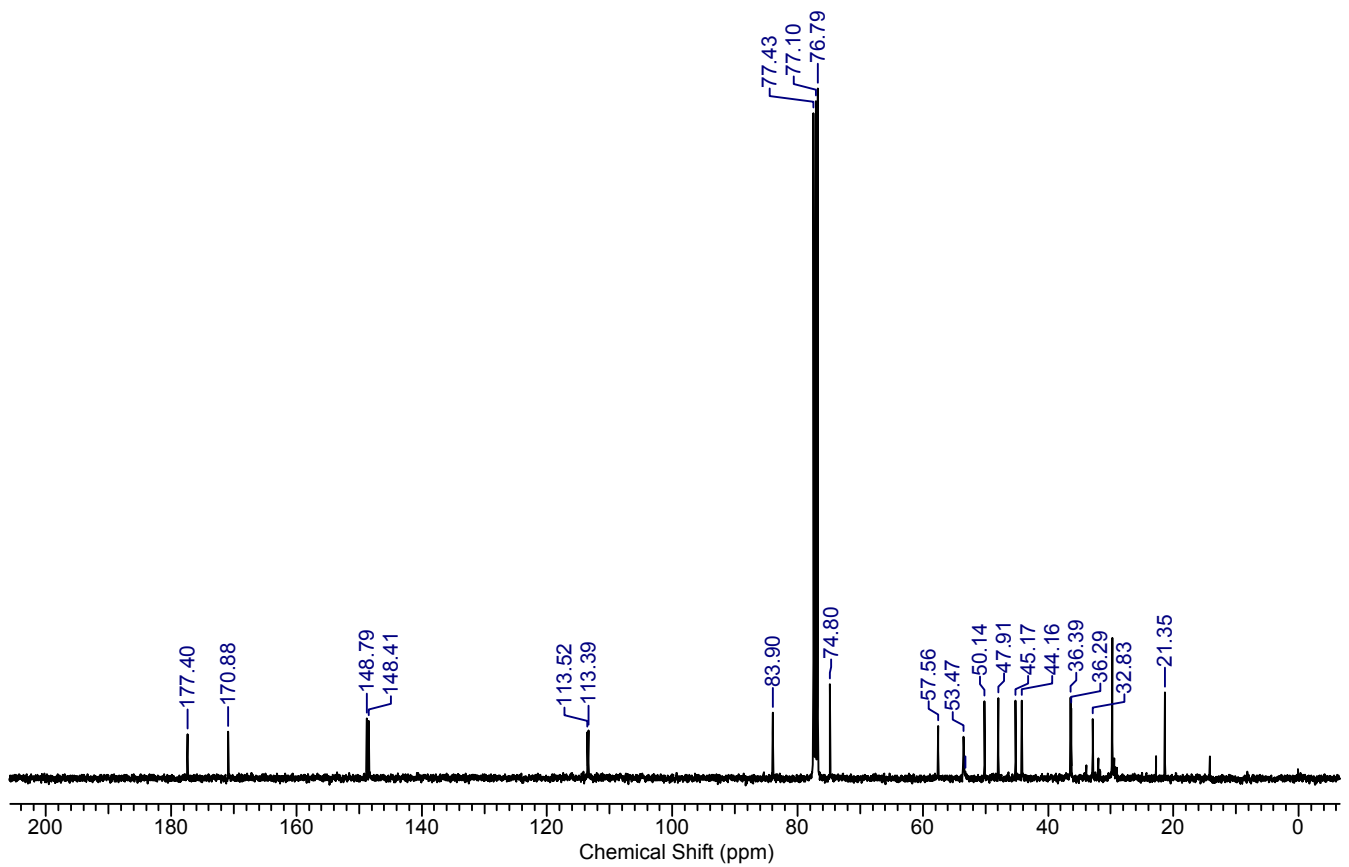

**DEPT of Compound 15 (100 MHz, CDCl<sub>3</sub>)**

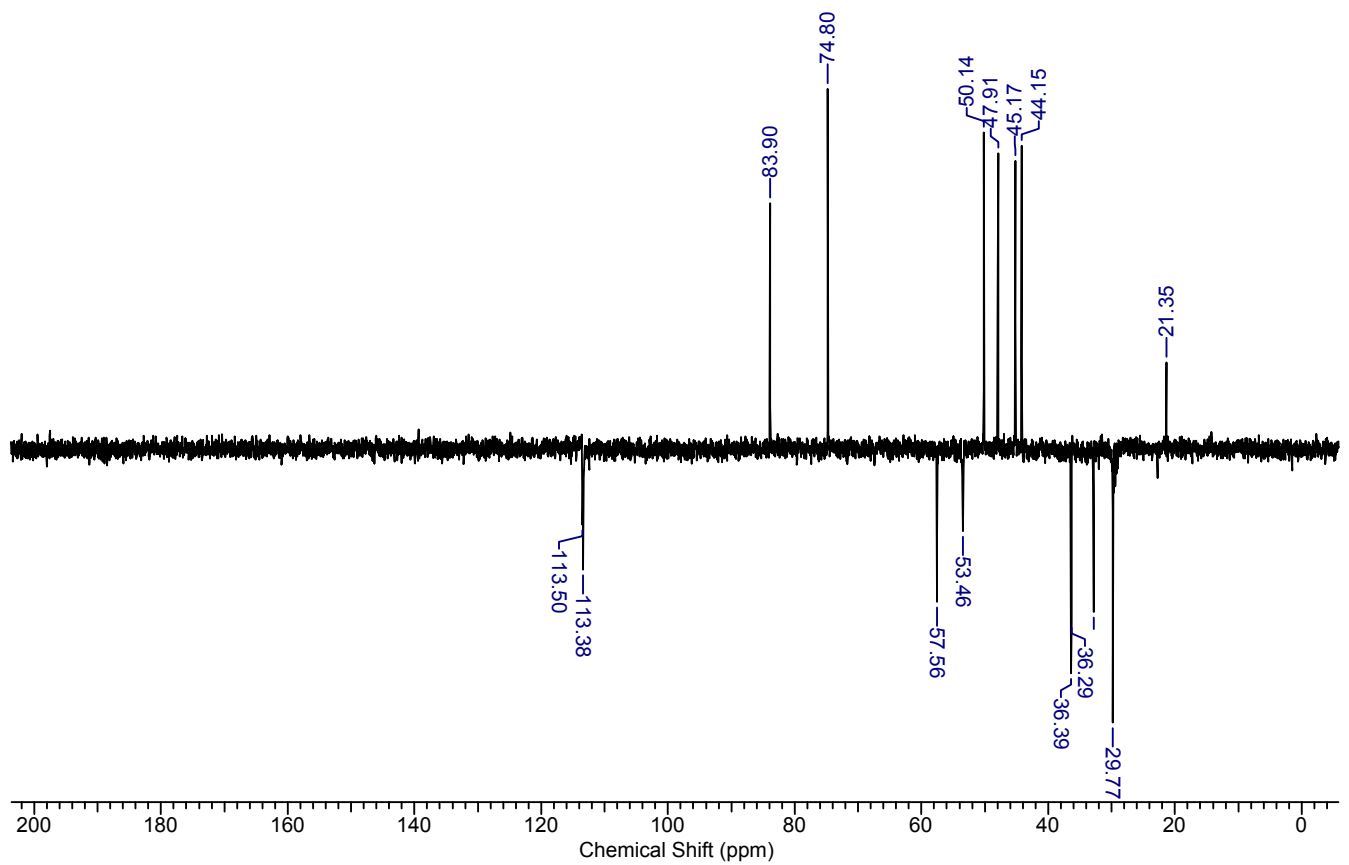

# LC-MS of Compound 15

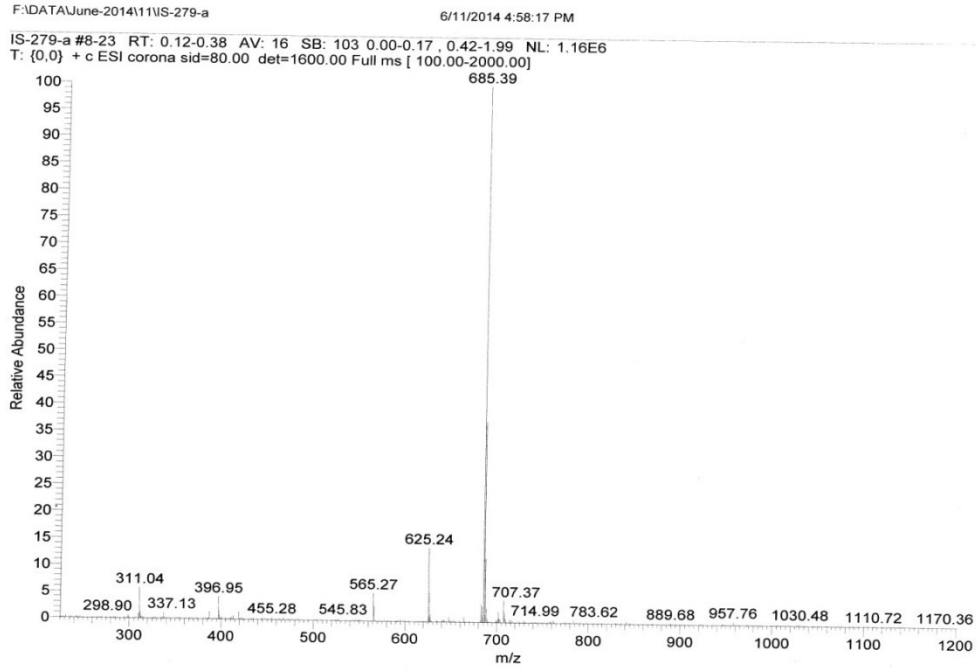

# HR-MS of Compound 15

IS-279-B #86 RT: 0.38 AV: 1 NL: 1.01E8  
T: FTMS + p ESI Full ms [100.00-1500.00]

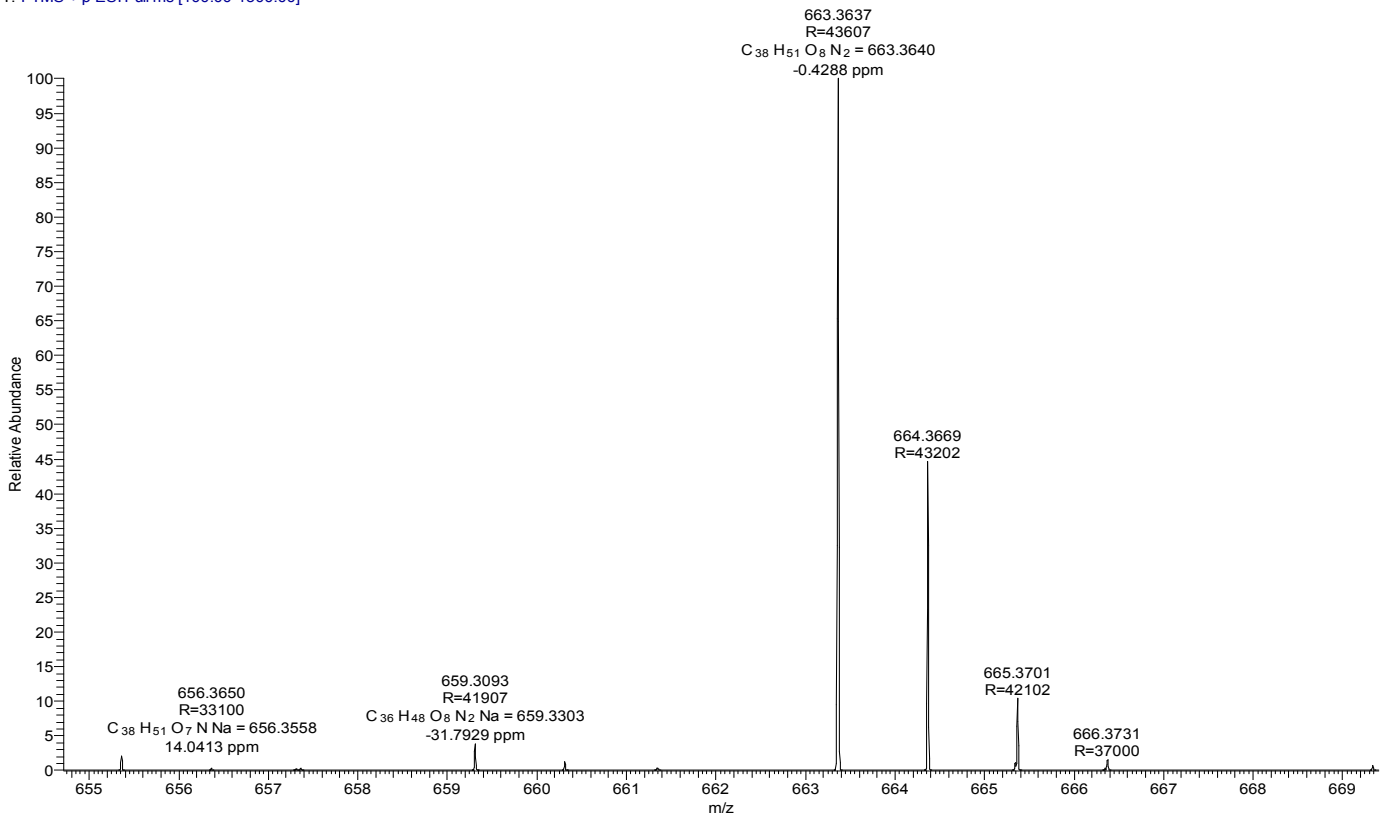

### <sup>1</sup>H NMR of Compound 16 (200 MHz, CDCl<sub>3</sub>)

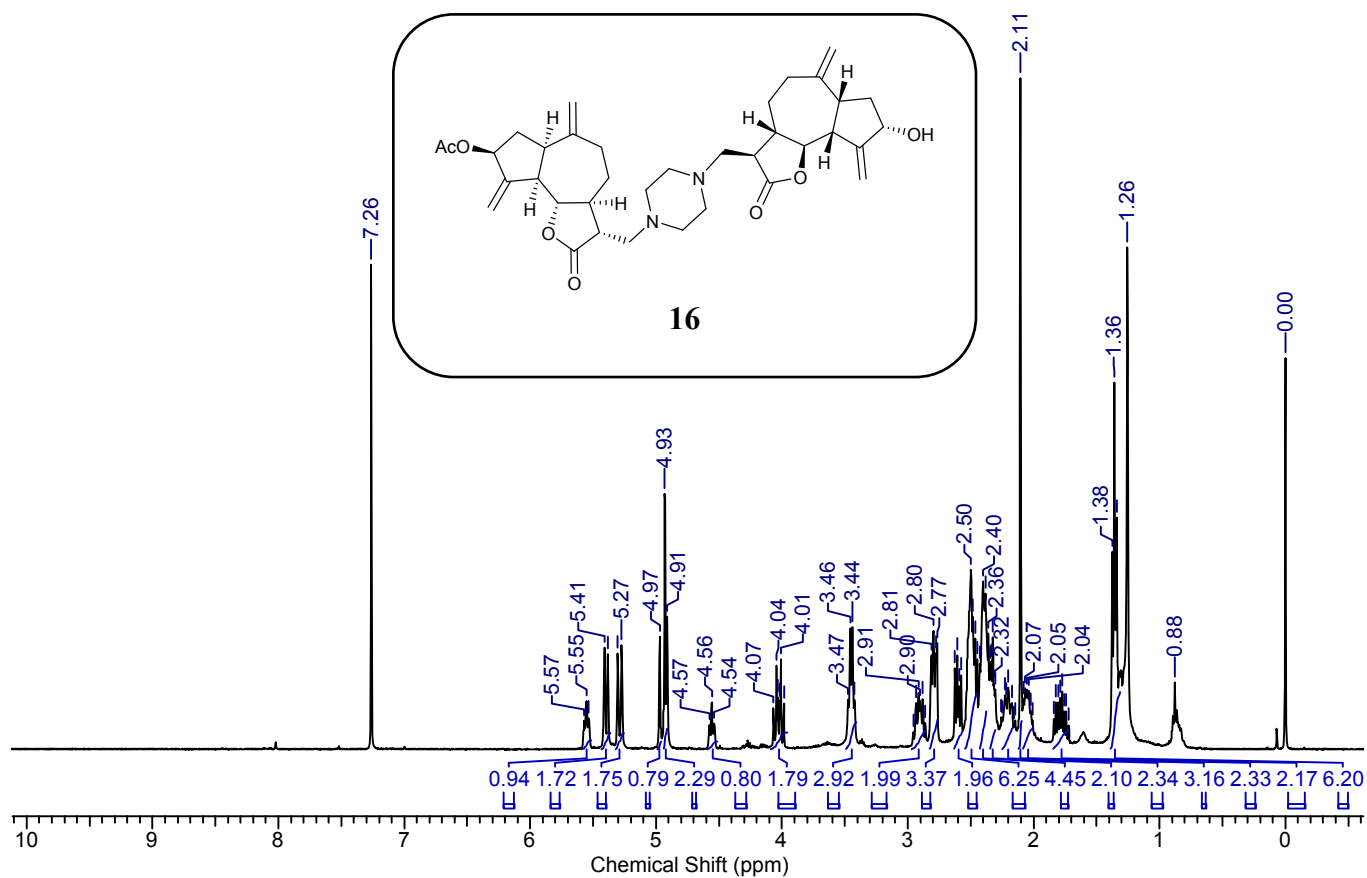

### <sup>13</sup>C NMR of Compound 16 (100 MHz, CDCl<sub>3</sub>)

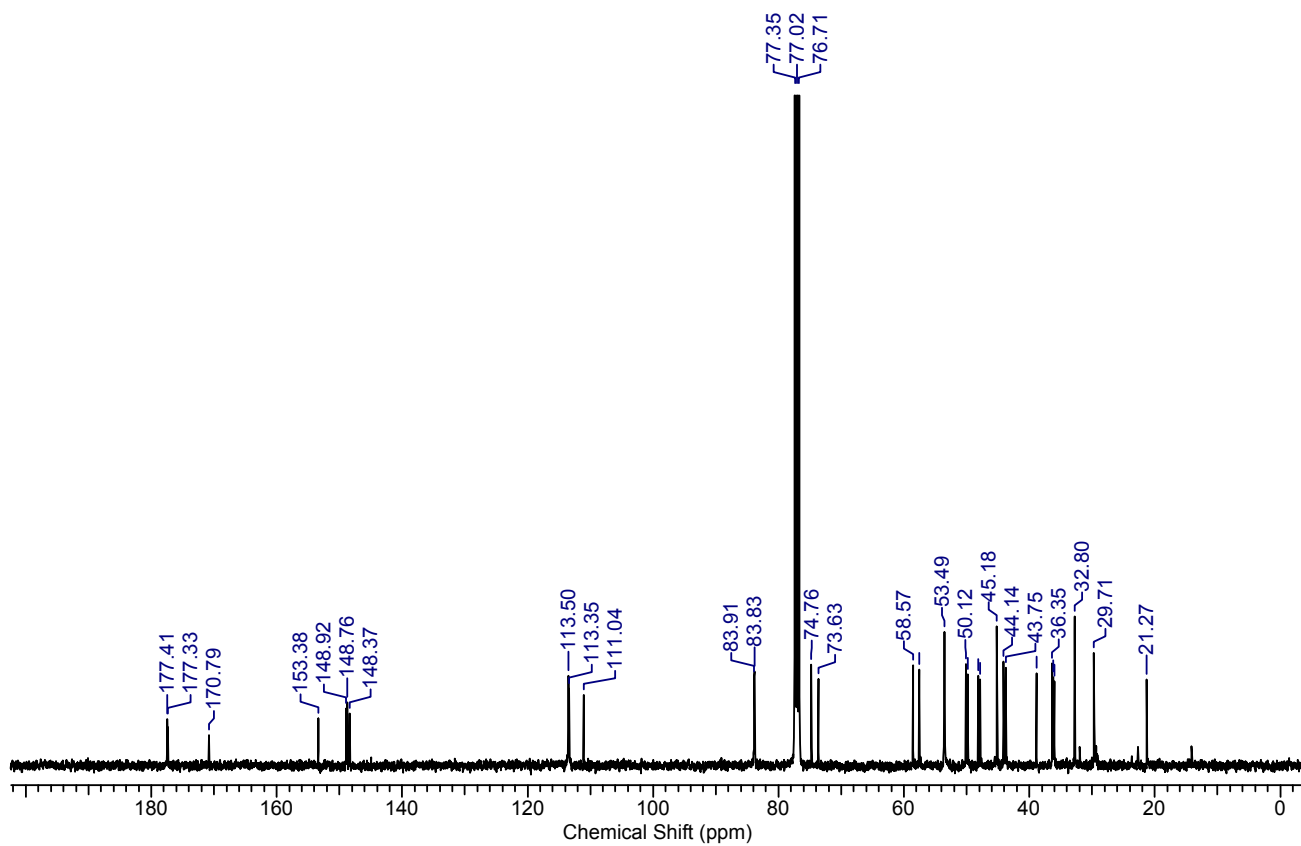



### DEPT of Compound 16 (100 MHz, CDCl<sub>3</sub>)

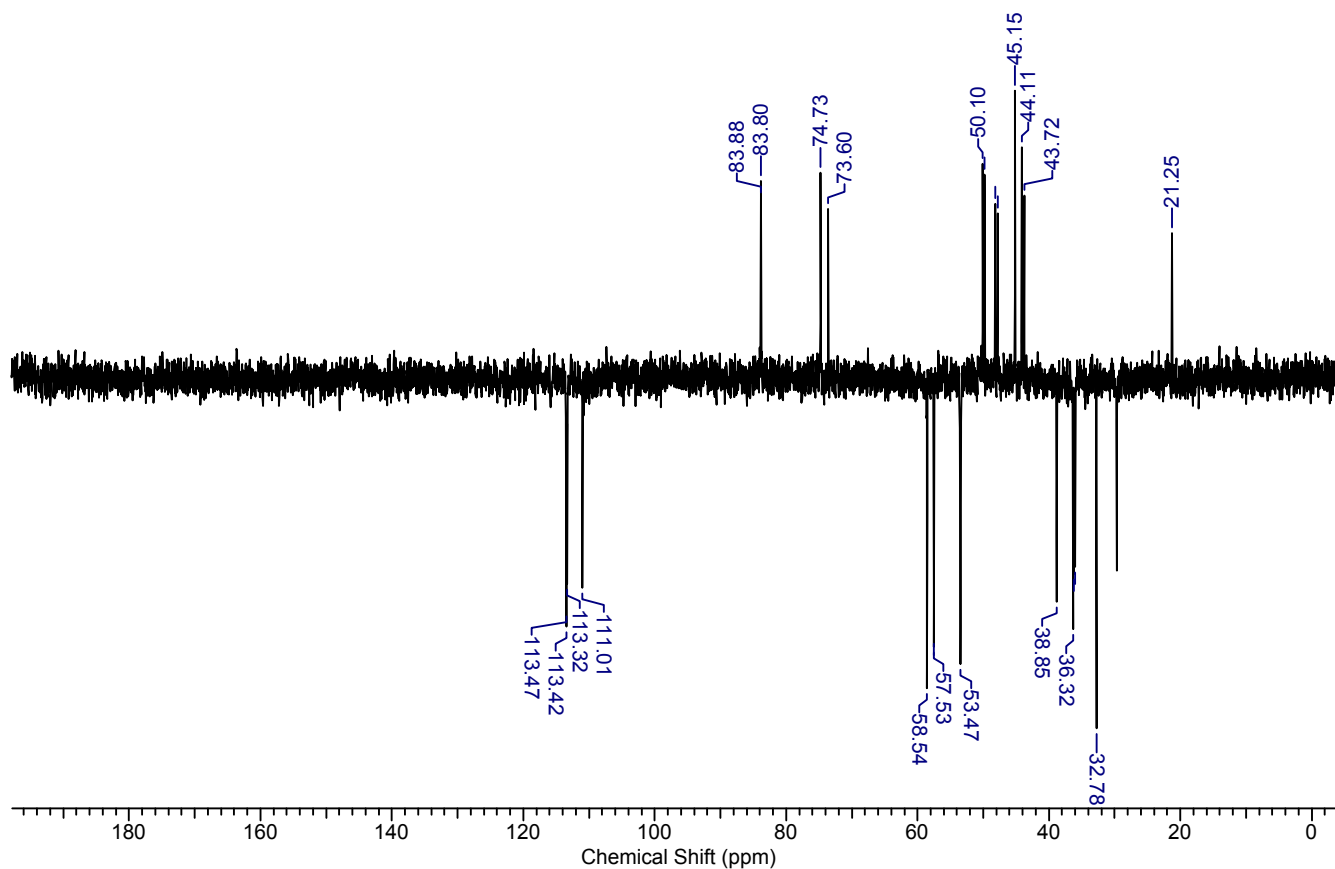

### LC-MS of Compound 16

F:\DATA\June-2014\11\MS-279-B

6/11/2014 5:00:54 PM

IS-279-B #7-22 RT: 0.10-0.36 AV: 16 SB: 61 0.00-0.19, 0.36-1.20 NL: 2.48E5  
T: {0,0} +c ESI corona sid=80.00 det=1600.00 Full ms [ 100.00-2000.00]

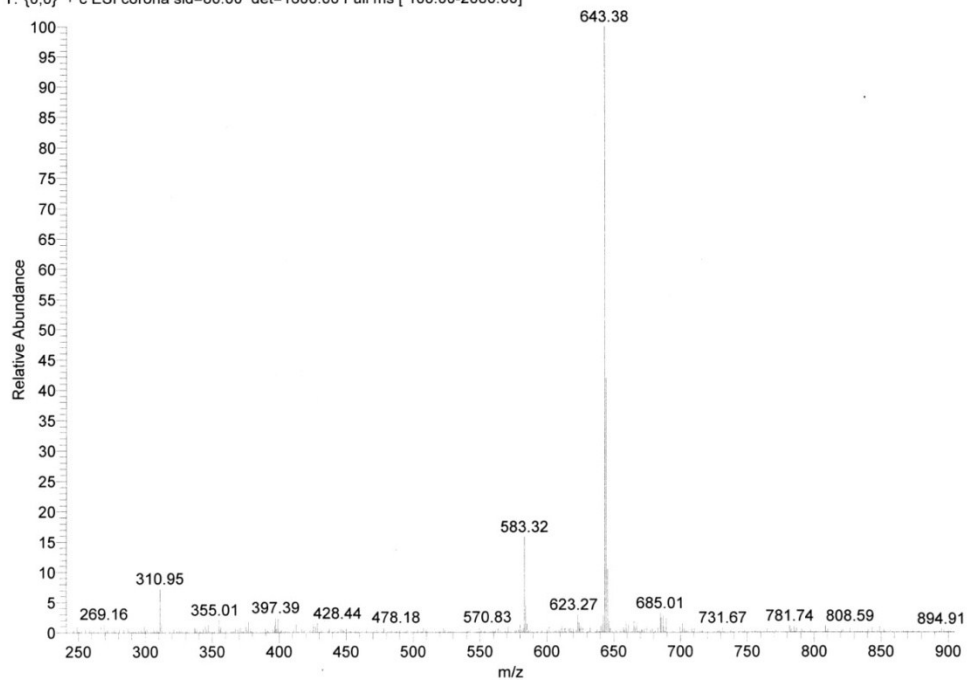

# HR-MS of Compound 16

IS-279-B #80 RT: 0.35 AV: 1 NL: 2.42E9  
T: FTMS + p ESI Full ms [100.00-1500.00]

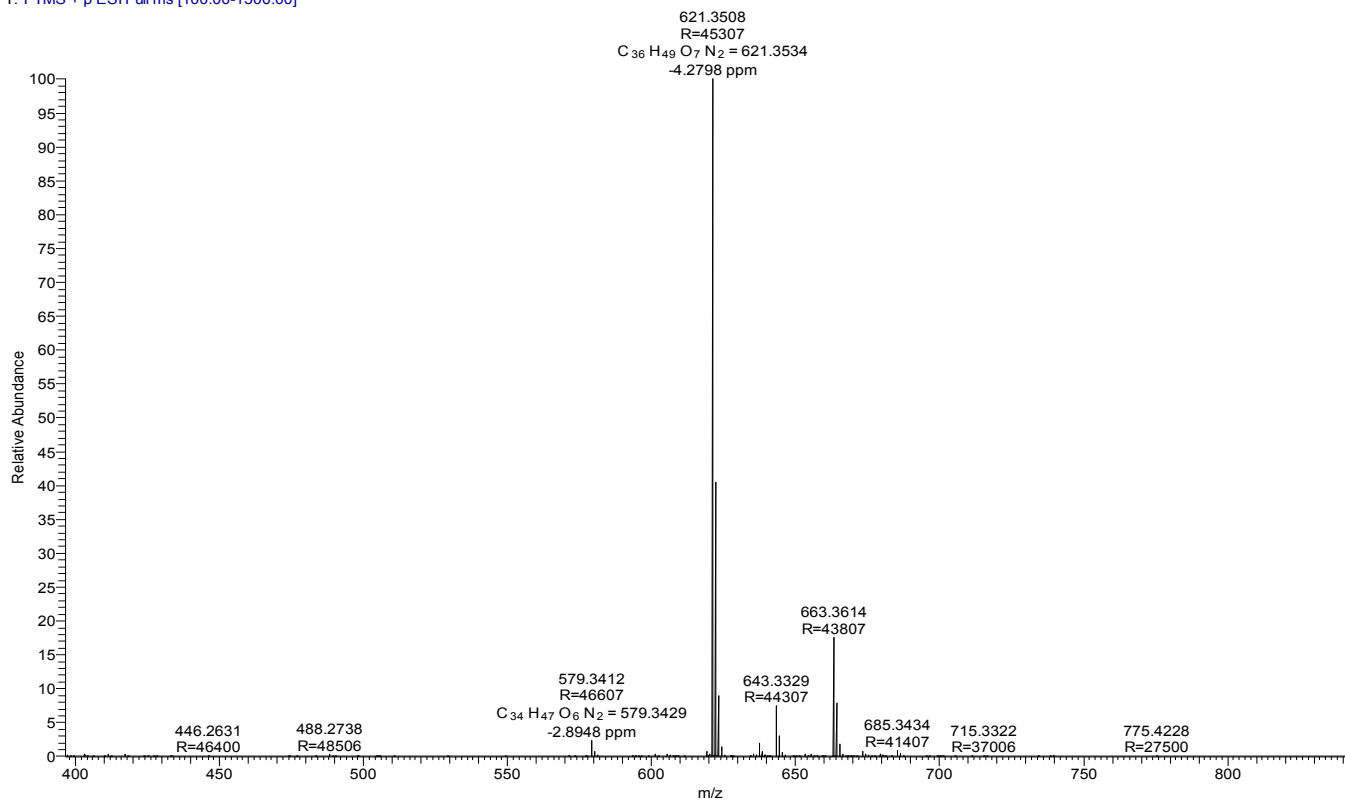

# <sup>1</sup>H NMR of Compound 17 (400 MHz, CDCl<sub>3</sub>)

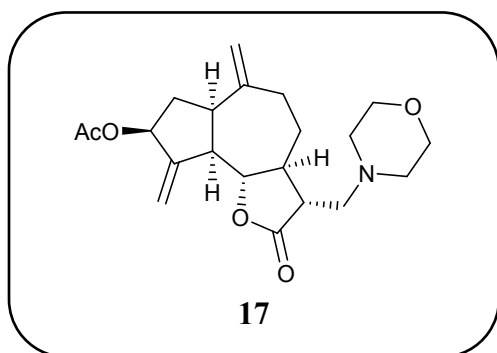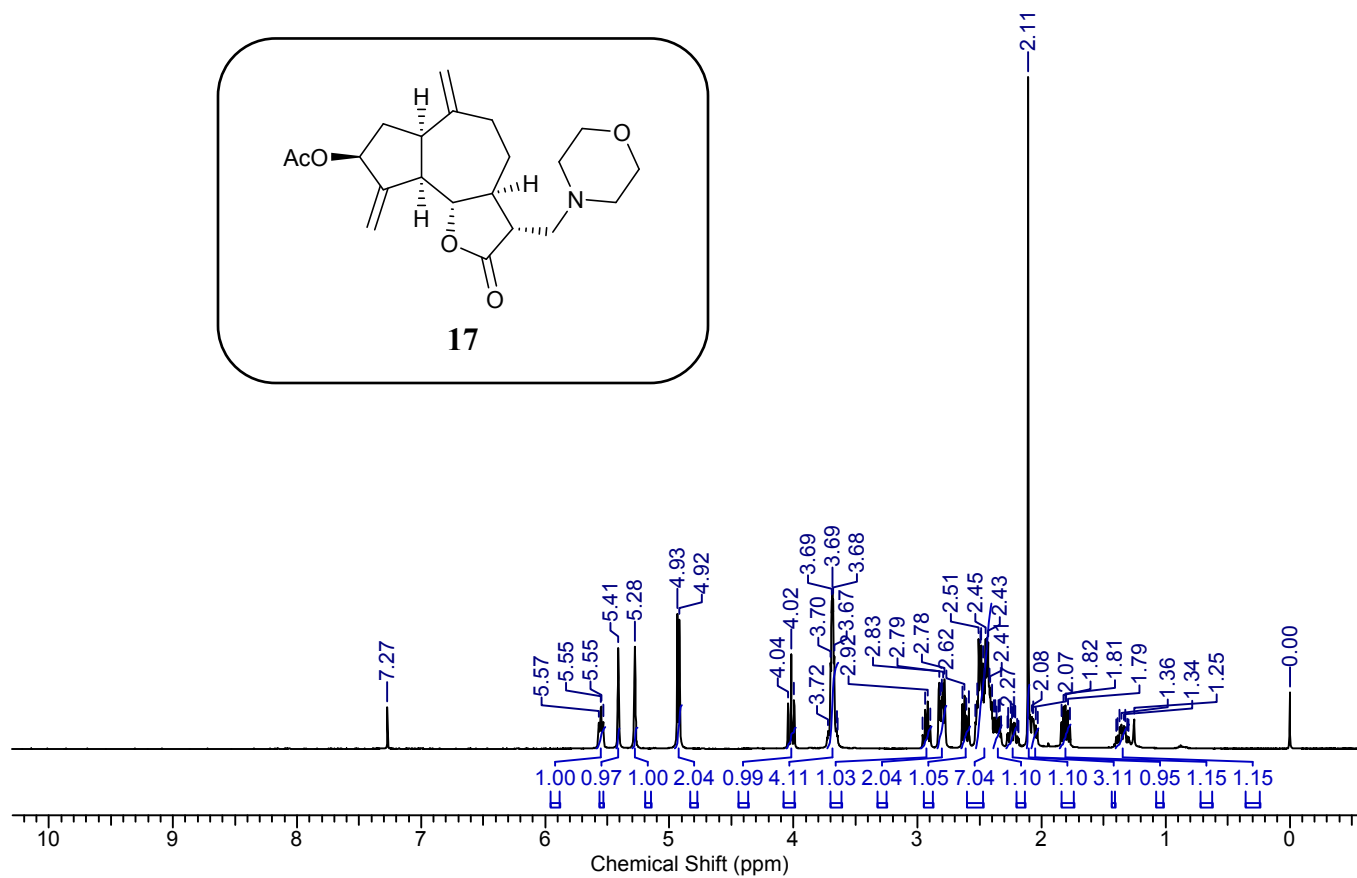

**$^{13}\text{C}$  NMR of Compound 17 (100 MHz,  $\text{CDCl}_3$ )**

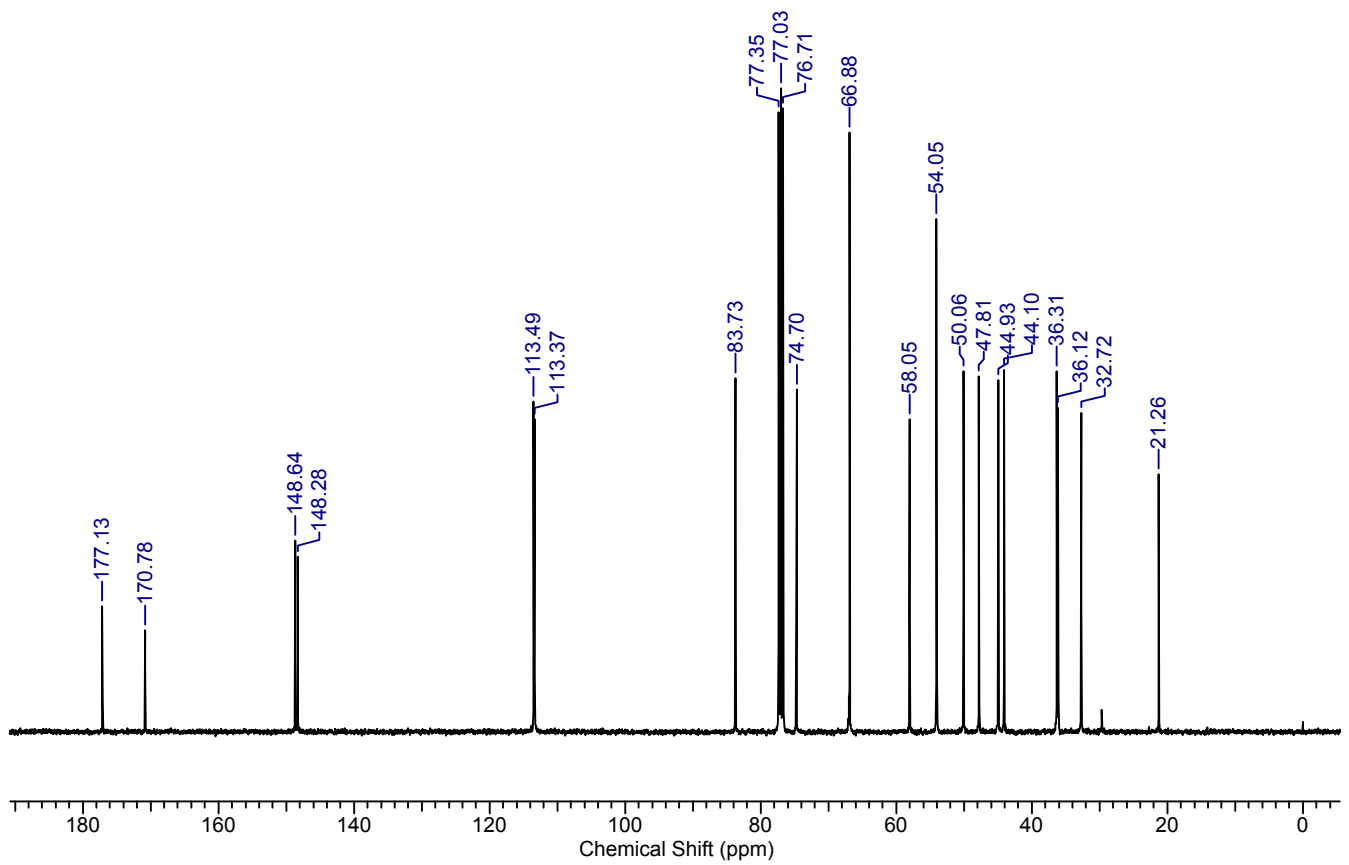

**DEPT of Compound 17 (100 MHz,  $\text{CDCl}_3$ )**

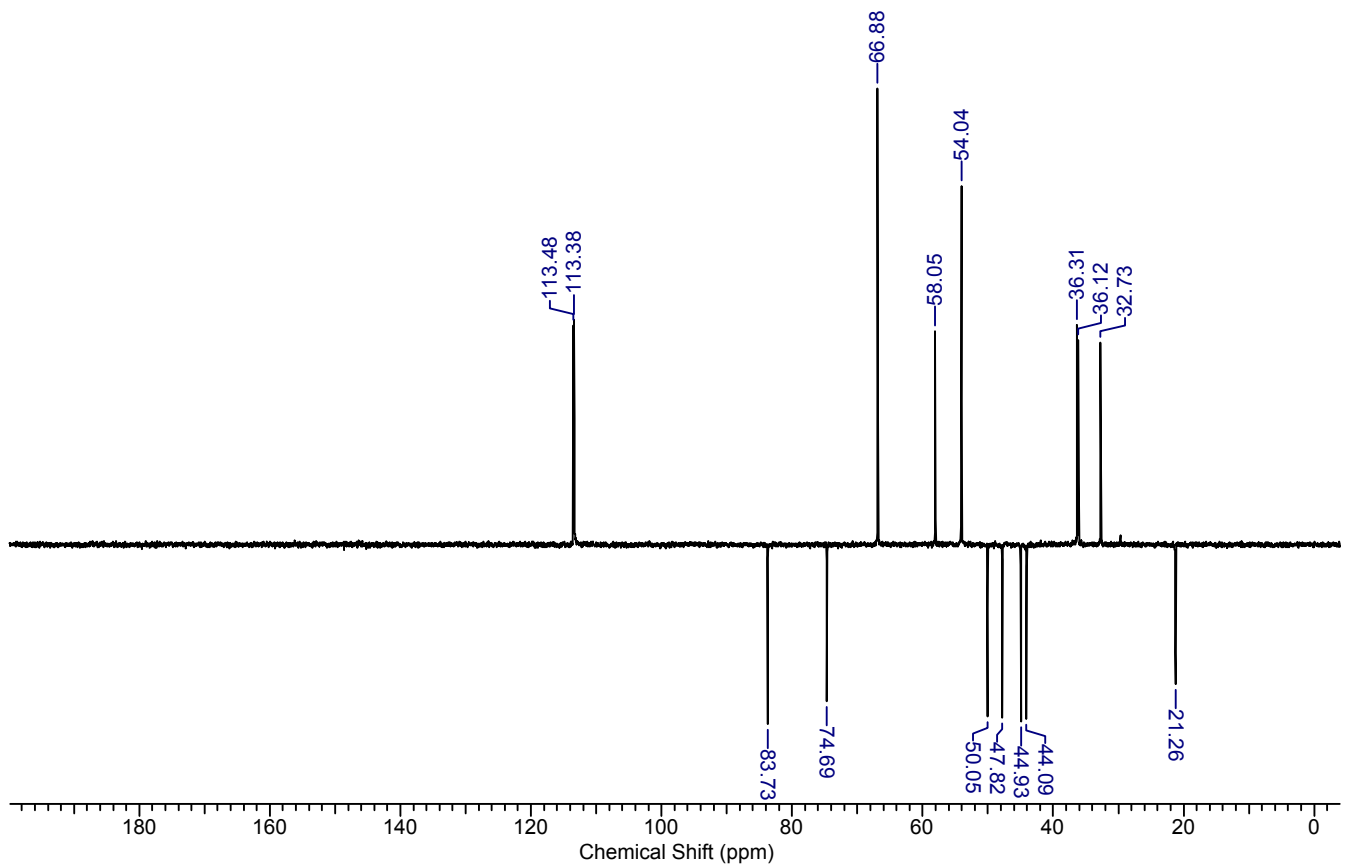

# LC-MS of Compound 17

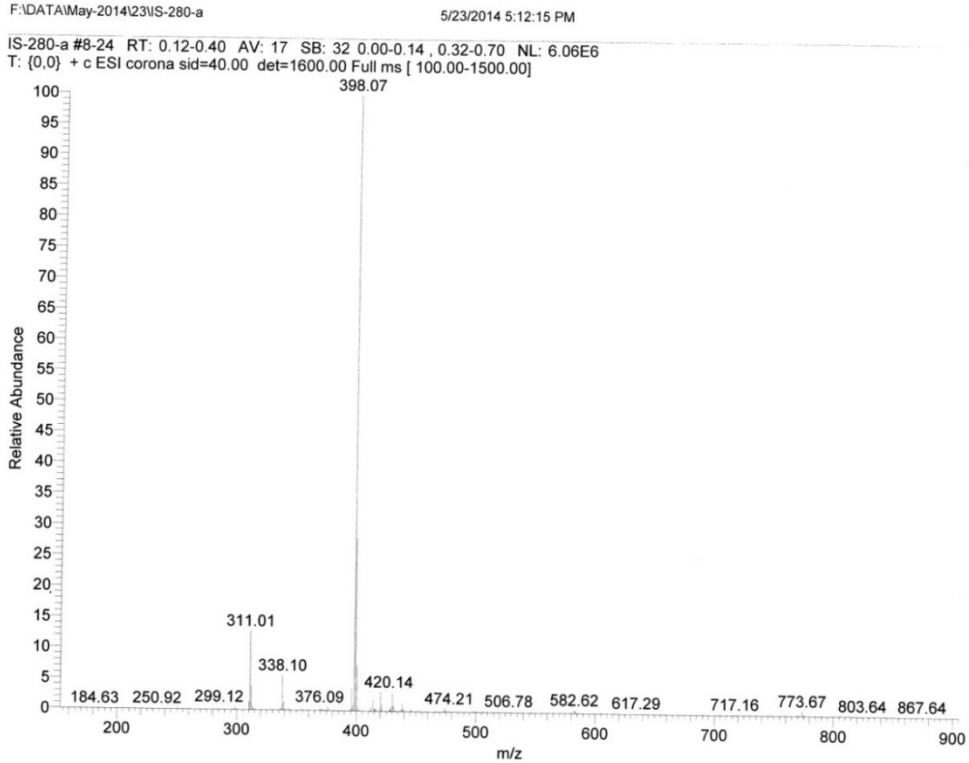

# HR-MS of Compound 17

IS-280-B #87 RT: 0.38 AV: 1 NL: 1.64E8  
T: FTMS + p ESI Full ms [100.00-1500.00]

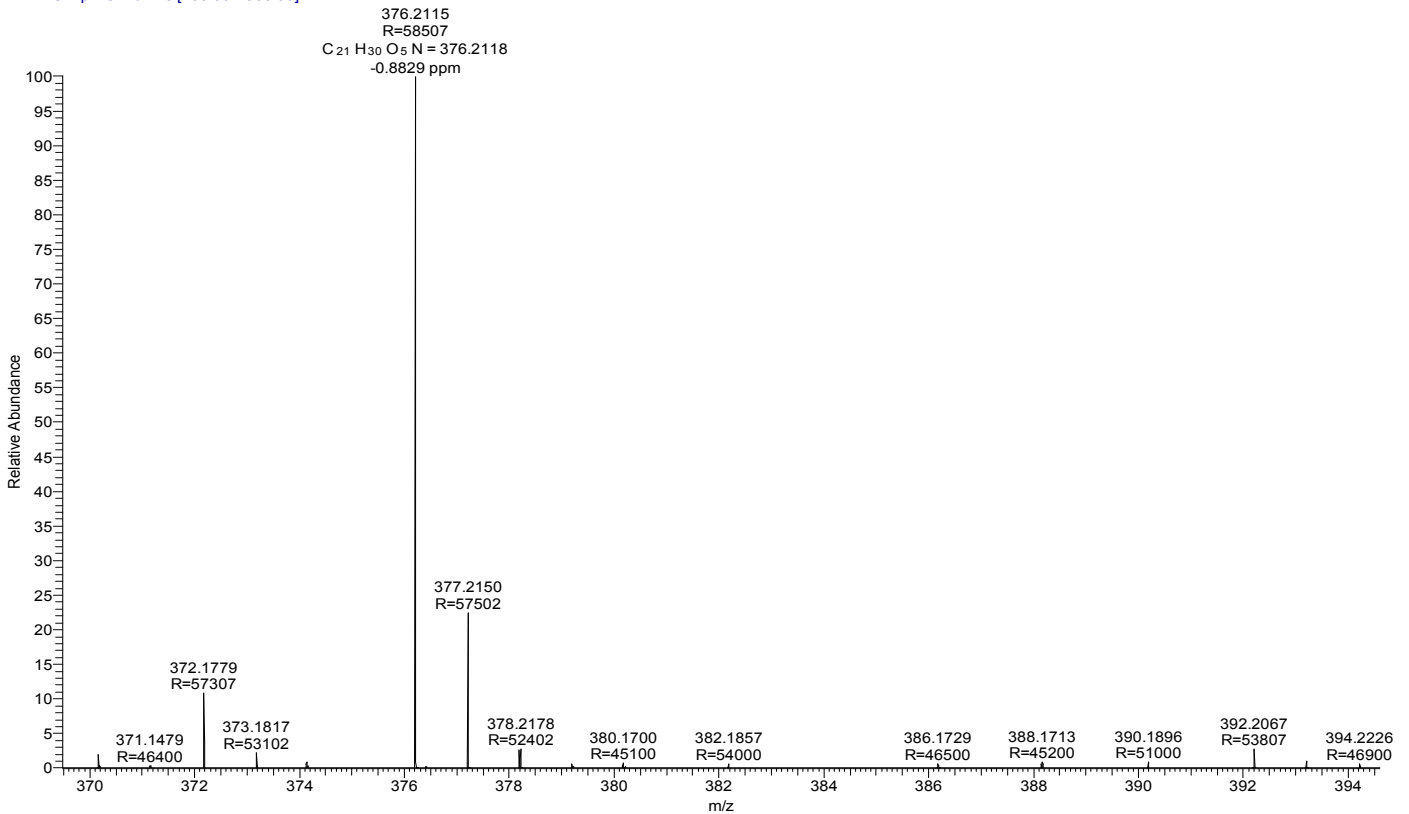

**<sup>1</sup>H NMR of Compound 18 (500 MHz, CDCl<sub>3</sub>)**

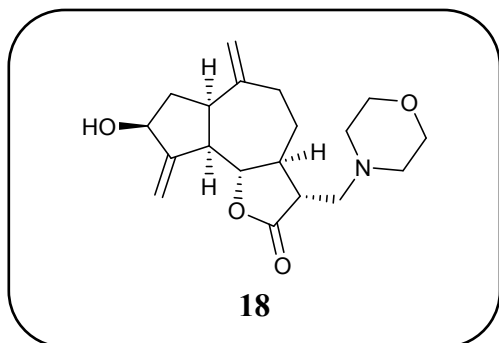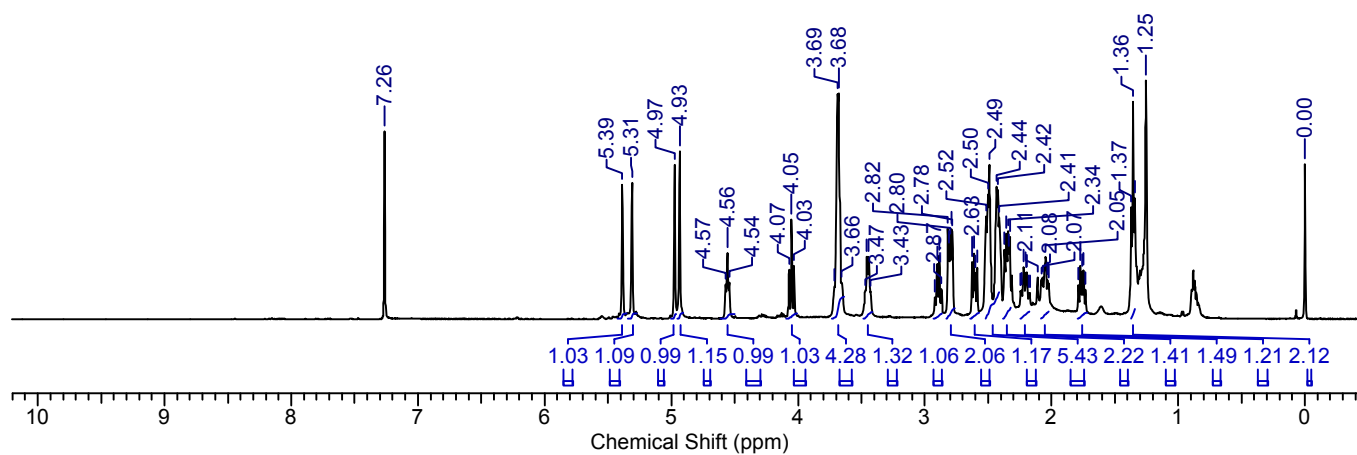

**<sup>13</sup>C NMR of Compound 18 (125 MHz, CDCl<sub>3</sub>)**

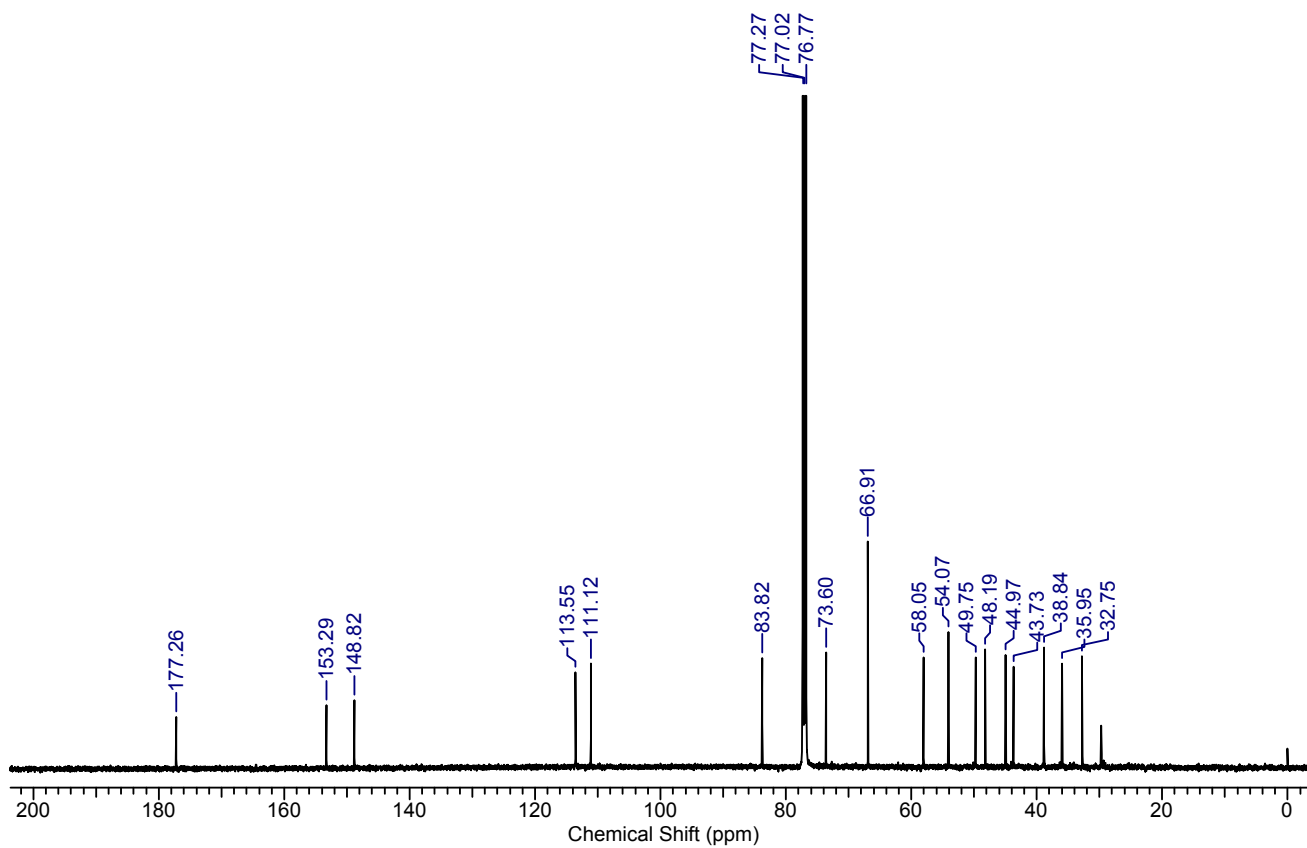

### DEPT of Compound 18 (125 MHz, CDCl<sub>3</sub>)

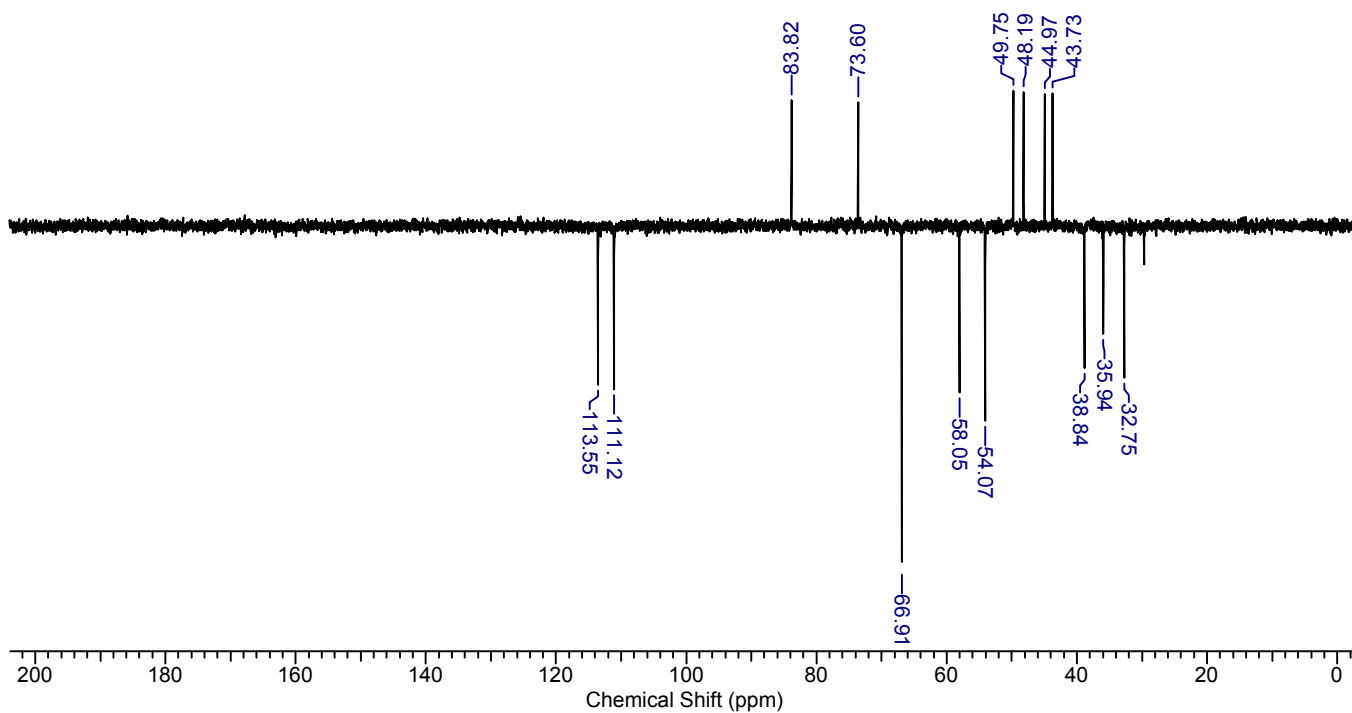

### LC-MS of Compound 18

F:\DATA\June-2014\11\IS-280-b

6/11/2014 5:02:42 PM

IS-280-b #10-17 RT: 0.16-0.28 AV: 8 SB: 43 0.00-0.17, 0.29-0.83 NL: 3.31E4  
T: (0,0) + c ESI corona sid=80.00 det=1600.00 Full ms [ 100.00-2000.00]

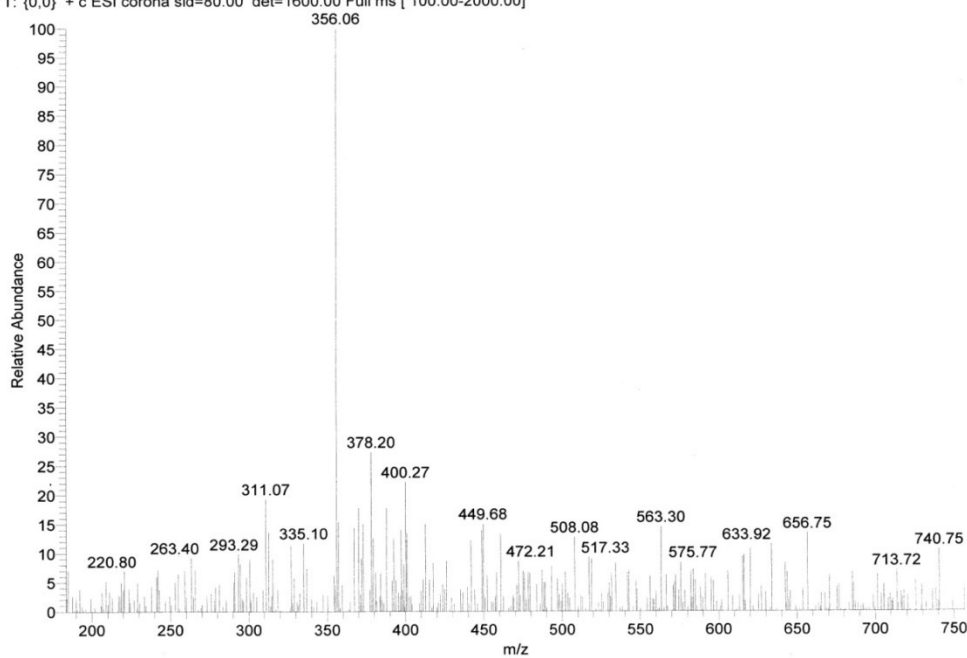

# HR-MS of Compound 18

IS-280-B #86 RT: 0.38 AV: 1 NL: 3.27E9  
T: FTMS + p ESI Full ms [100.00-1500.00]

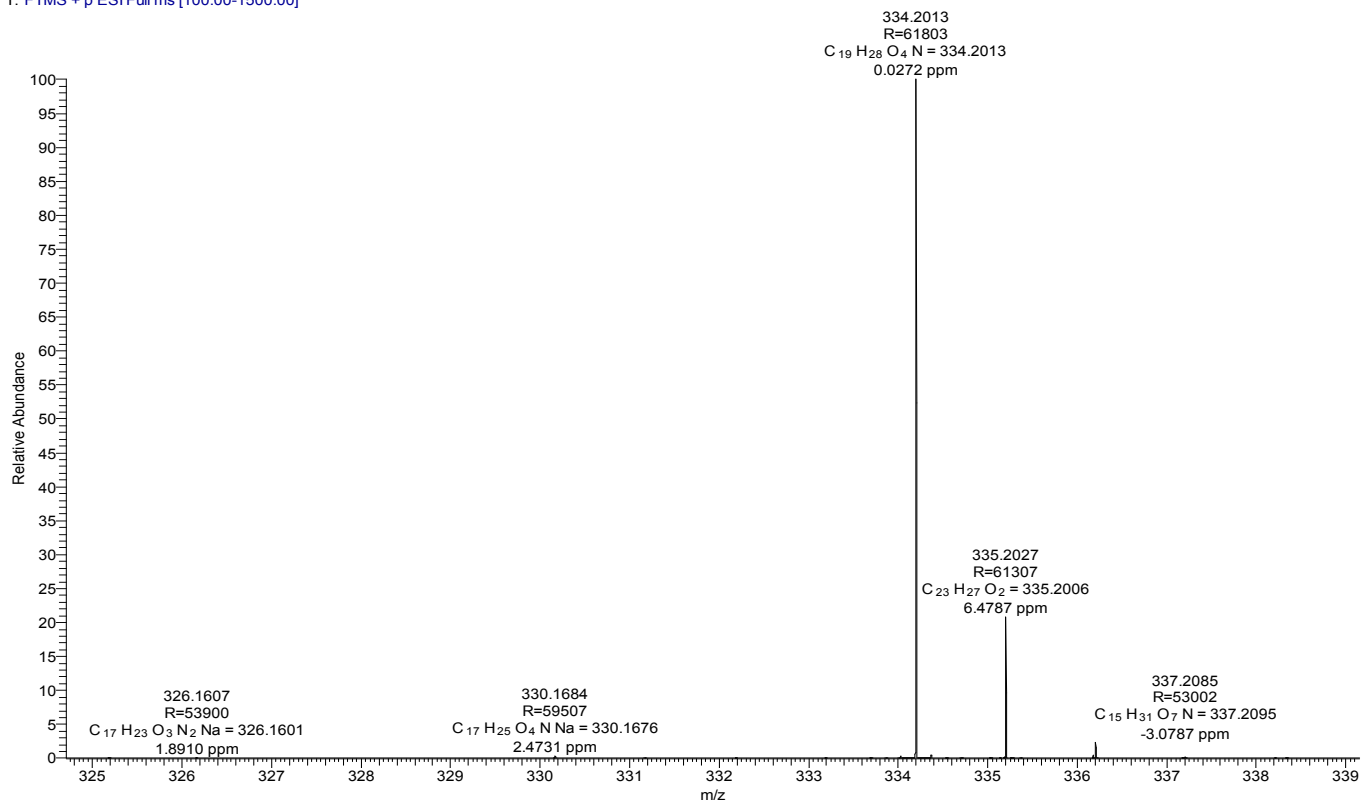

# <sup>1</sup>H NMR of Compound 19 (500 MHz, CDCl<sub>3</sub>)

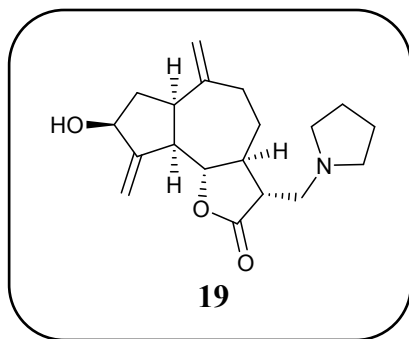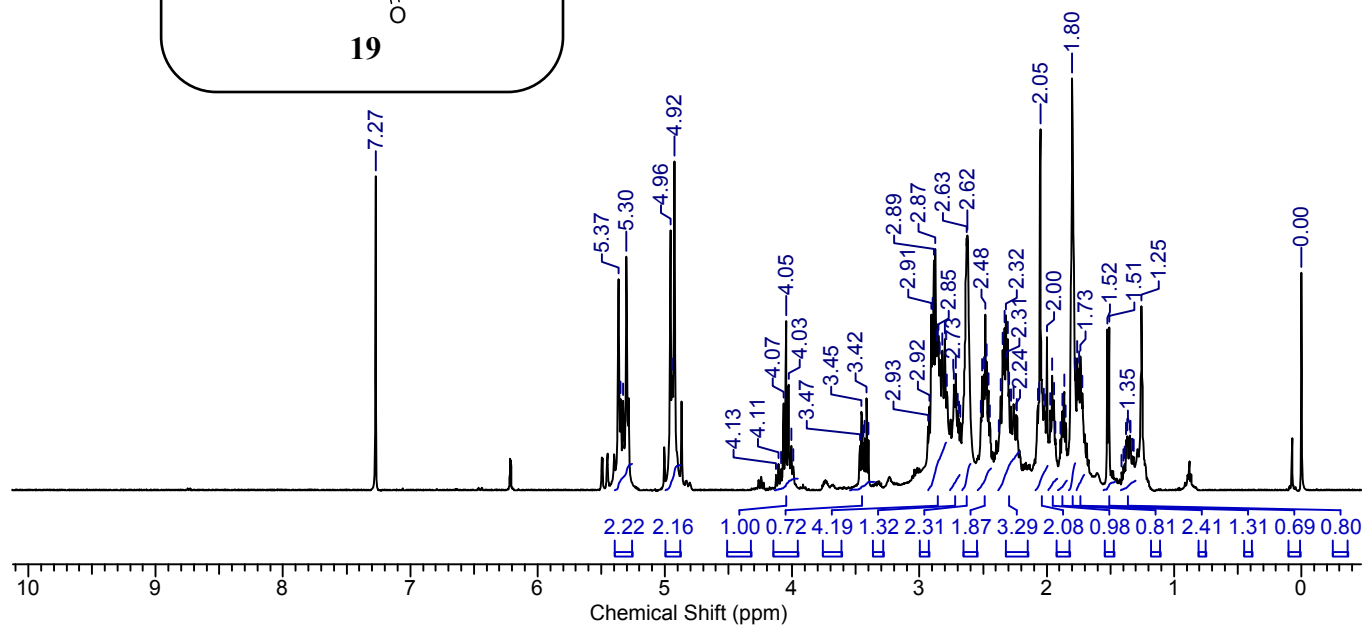

**$^{13}\text{C}$  NMR of Compound 19 (125 MHz,  $\text{CDCl}_3$ )**

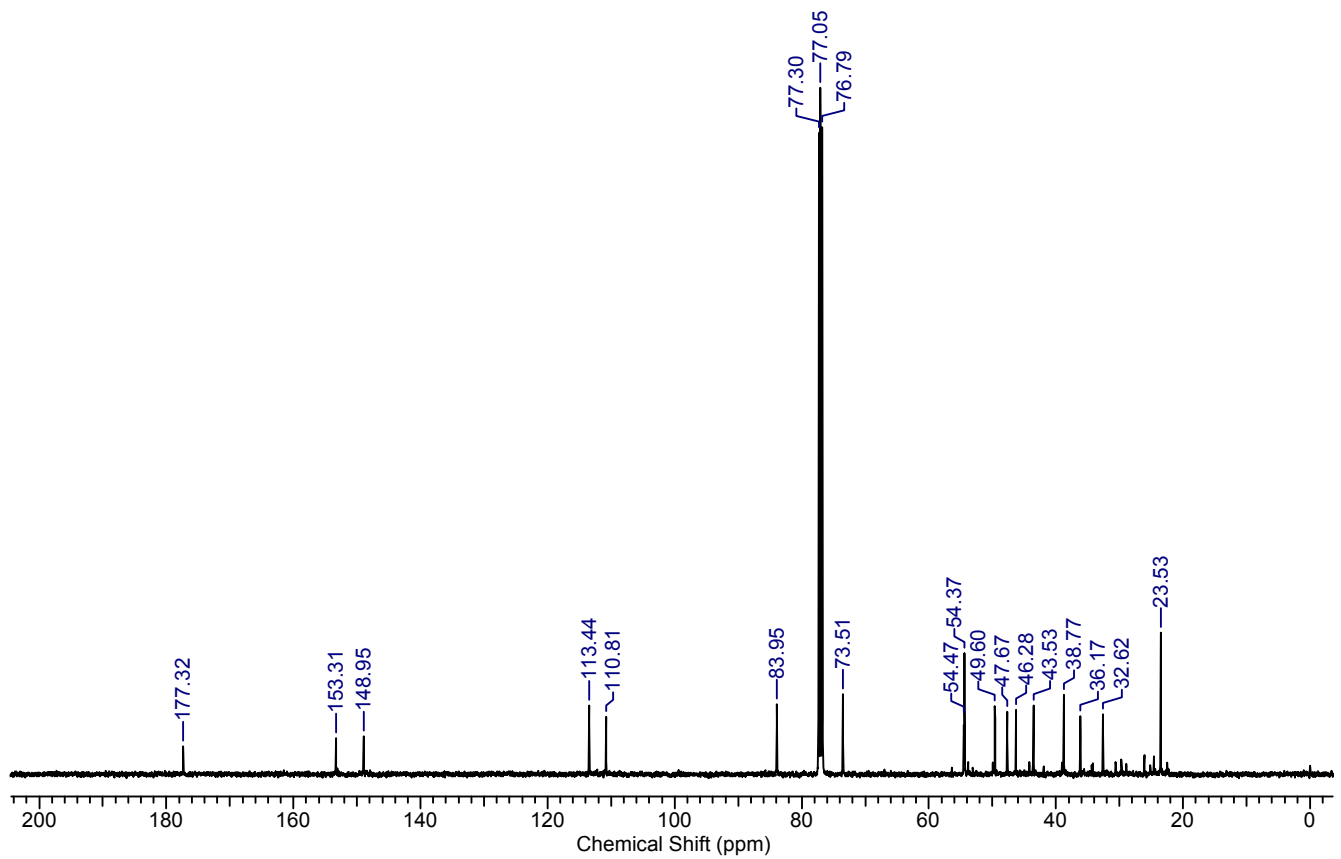

**DEPT of Compound 19 (125 MHz,  $\text{CDCl}_3$ )**

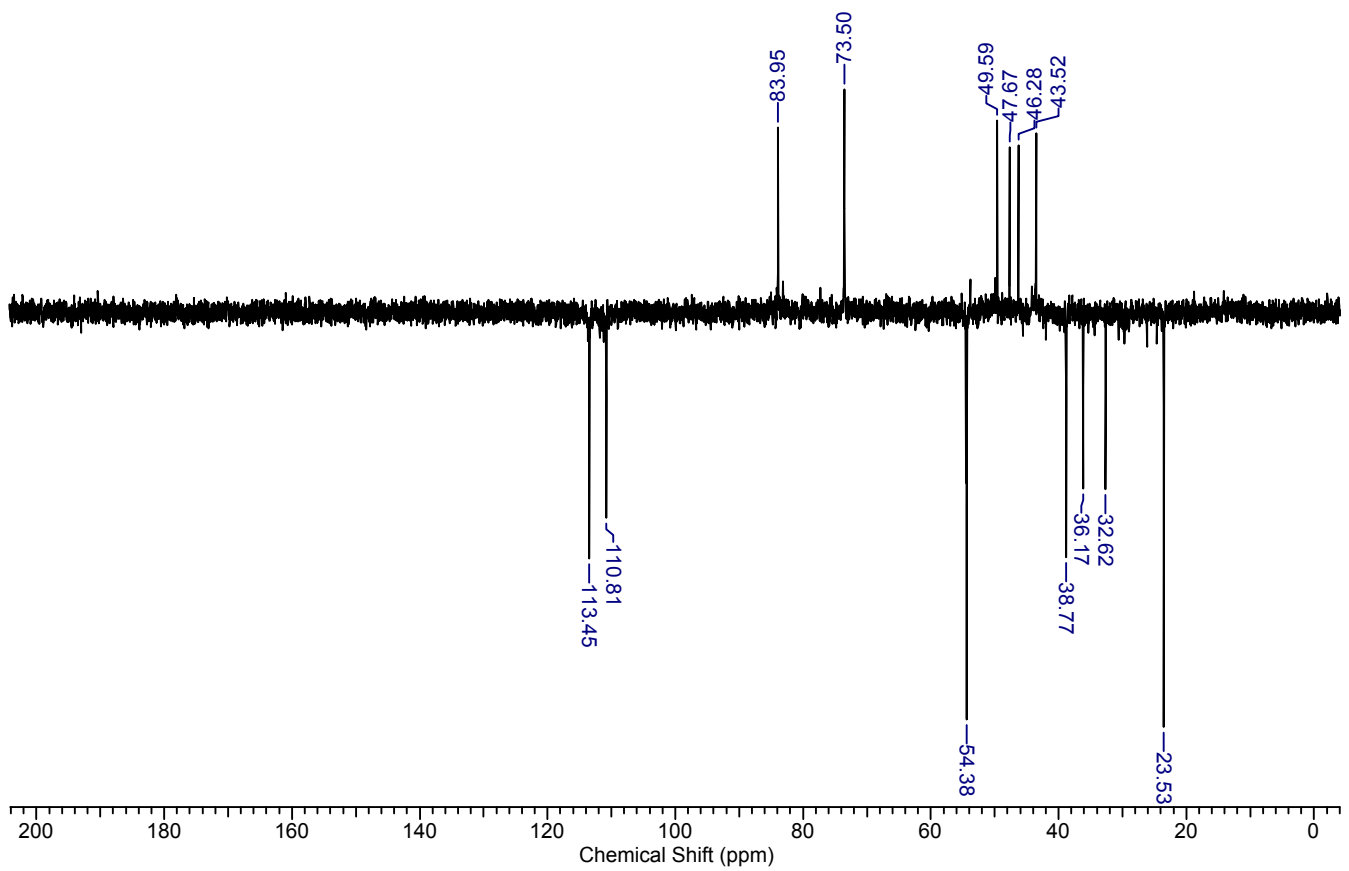



# LC-MS of Compound 19

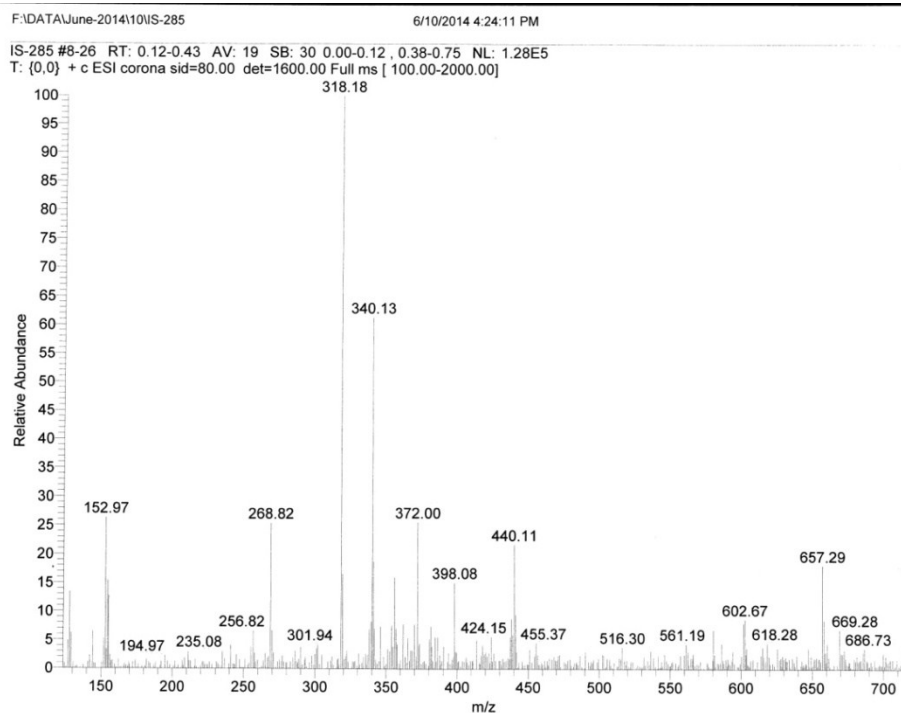

# HR-MS of Compound 19

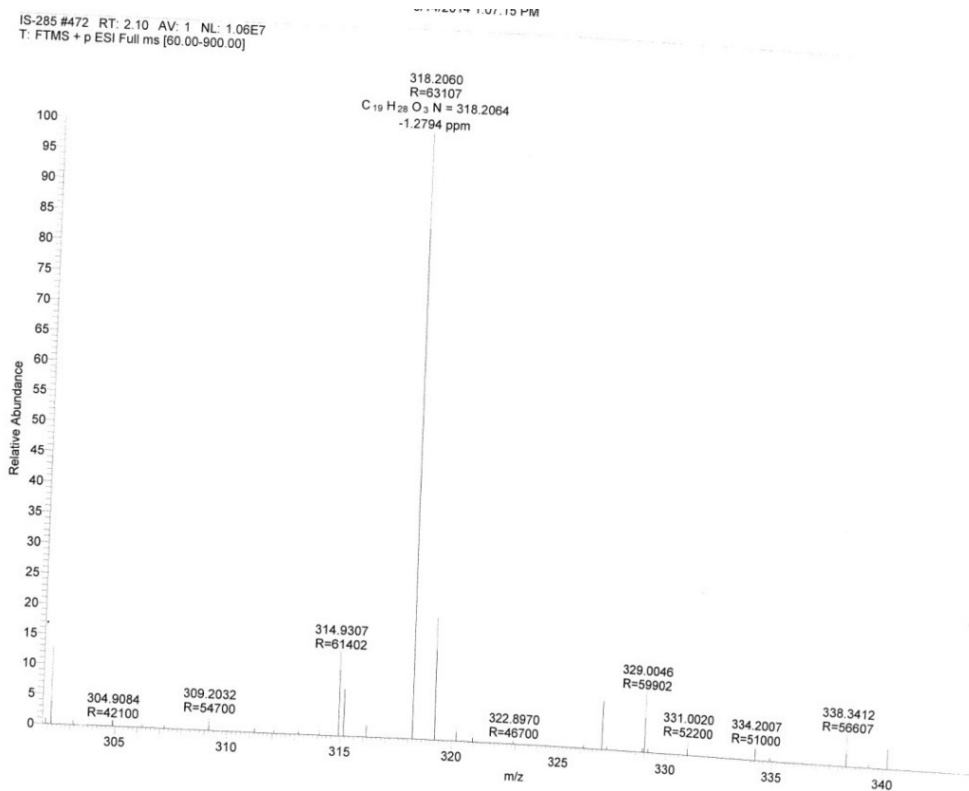

### <sup>1</sup>H NMR of Compound 20 (400 MHz, CDCl<sub>3</sub>)

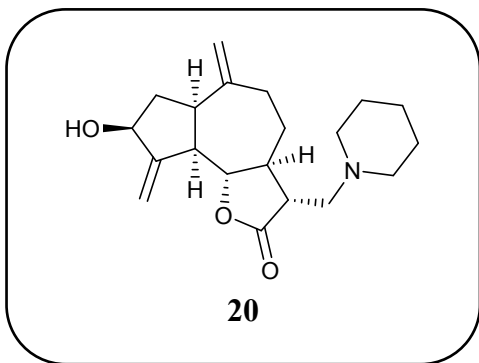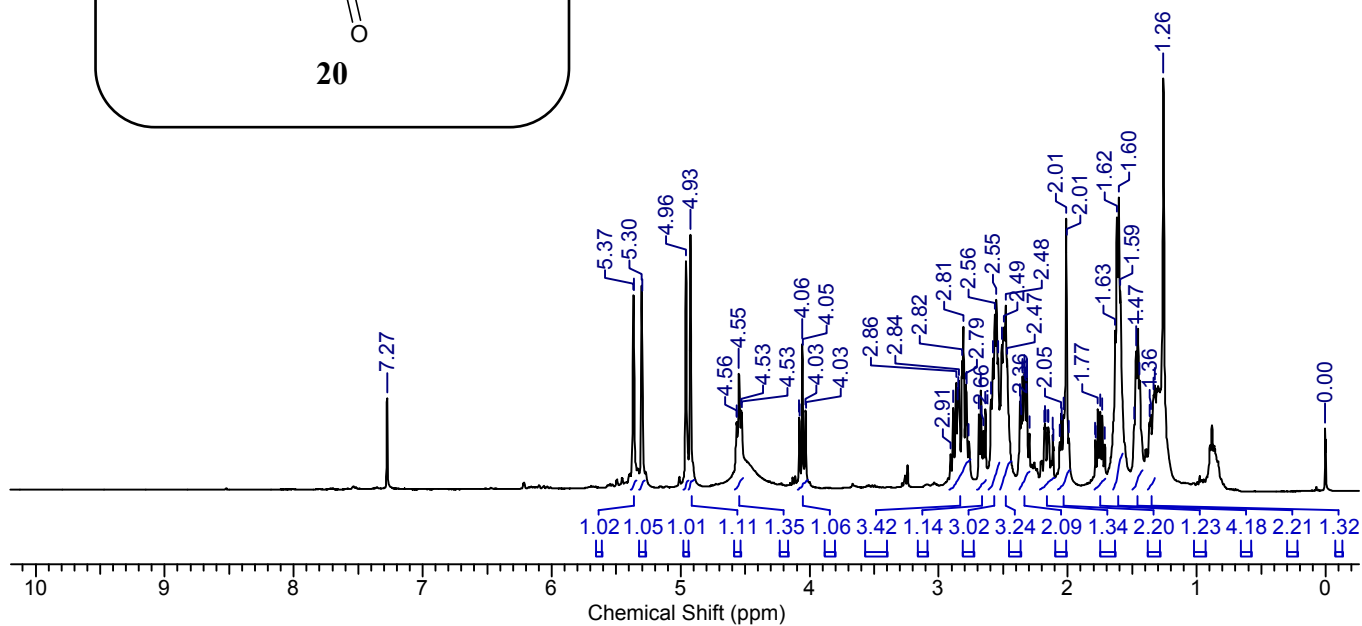

### <sup>13</sup>C NMR of Compound 20 (100 MHz, CDCl<sub>3</sub>)

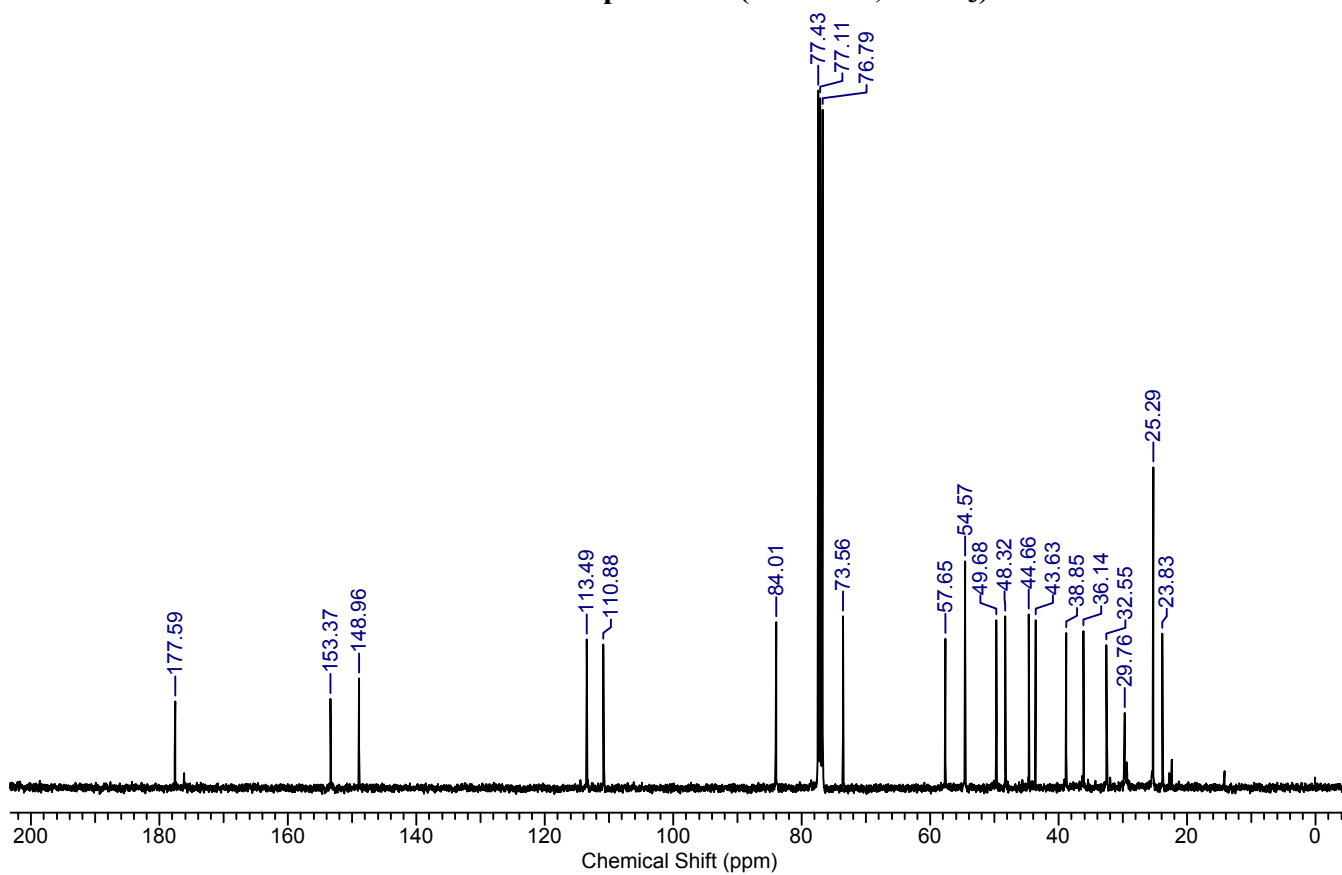

### DEPT of Compound 20 (100 MHz, CDCl<sub>3</sub>)

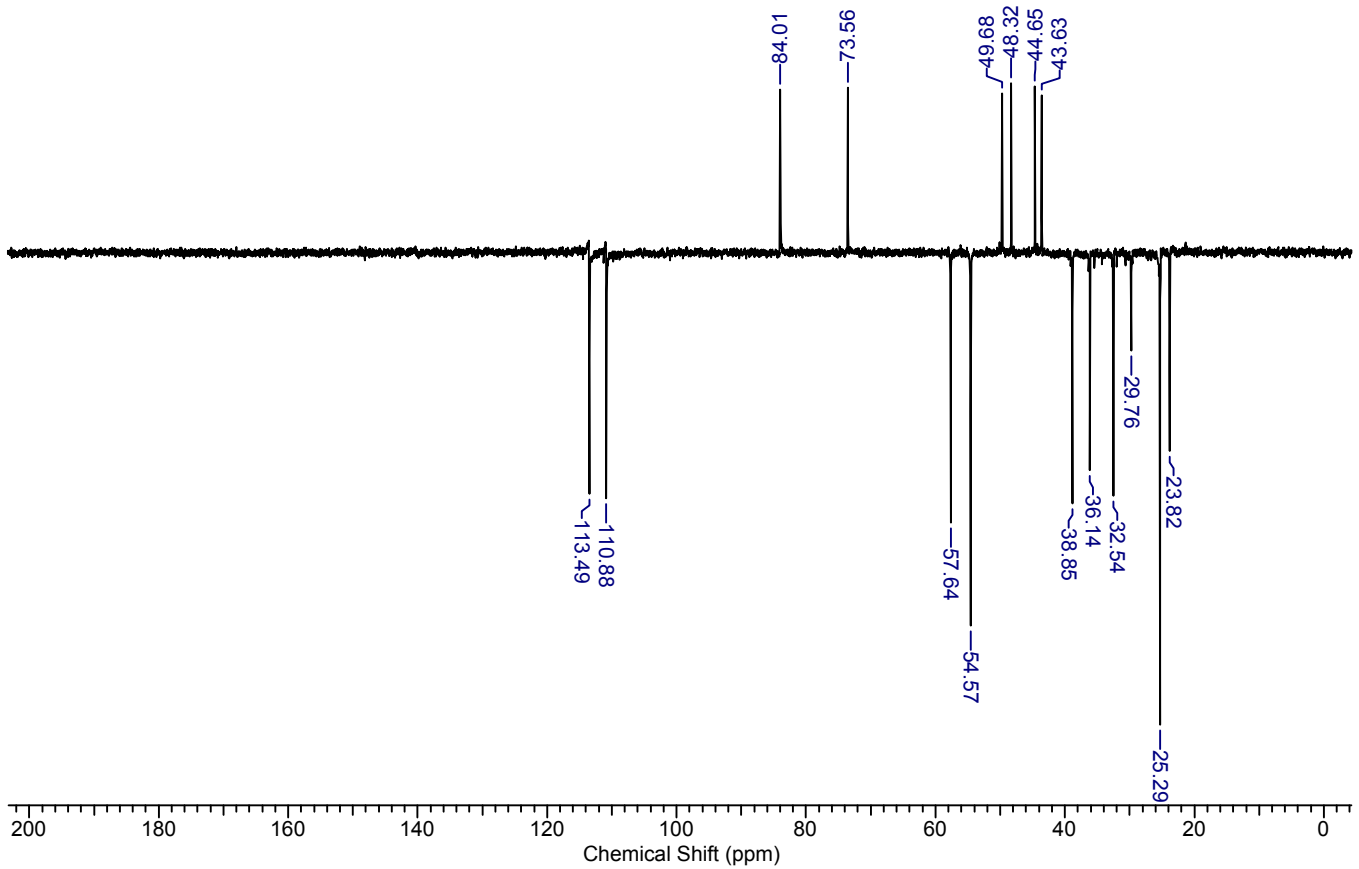

### LC-MS of Compound 20

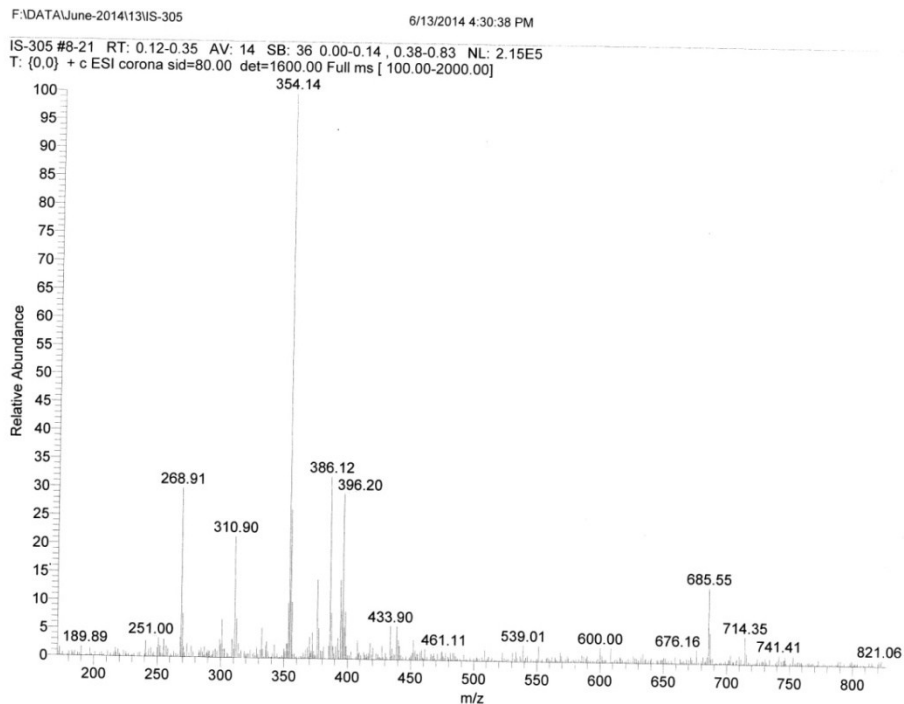

# HR-MS of Compound 20

IS-305-B #83 RT: 0.37 AV: 1 NL: 8.76E9  
T: FTMS + p ESI Full ms [133.40-2000.00]

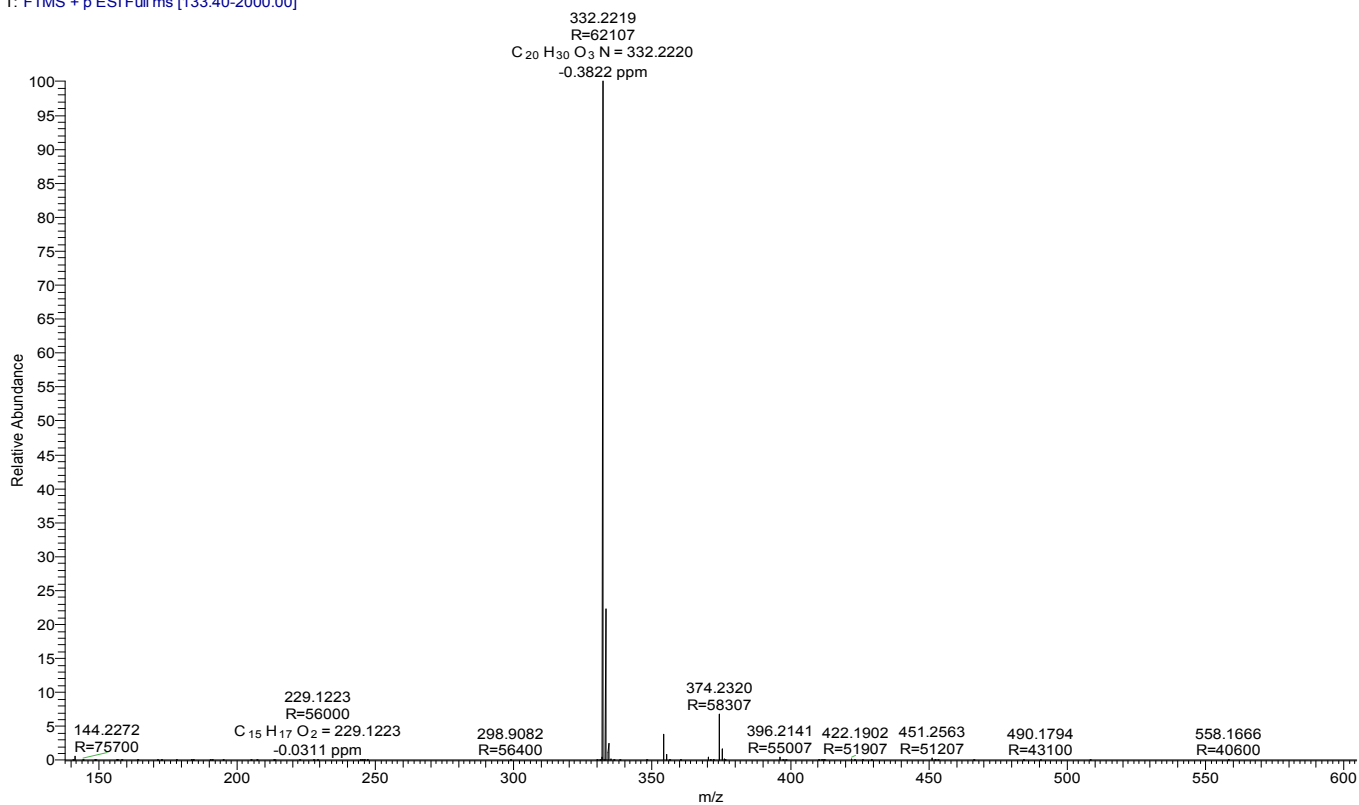

# <sup>1</sup>H NMR of Compound 21 (400 MHz, CDCl<sub>3</sub>)

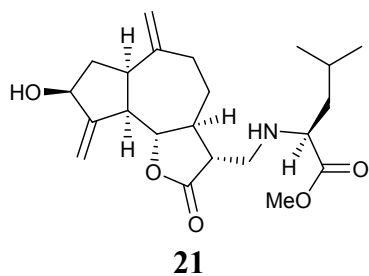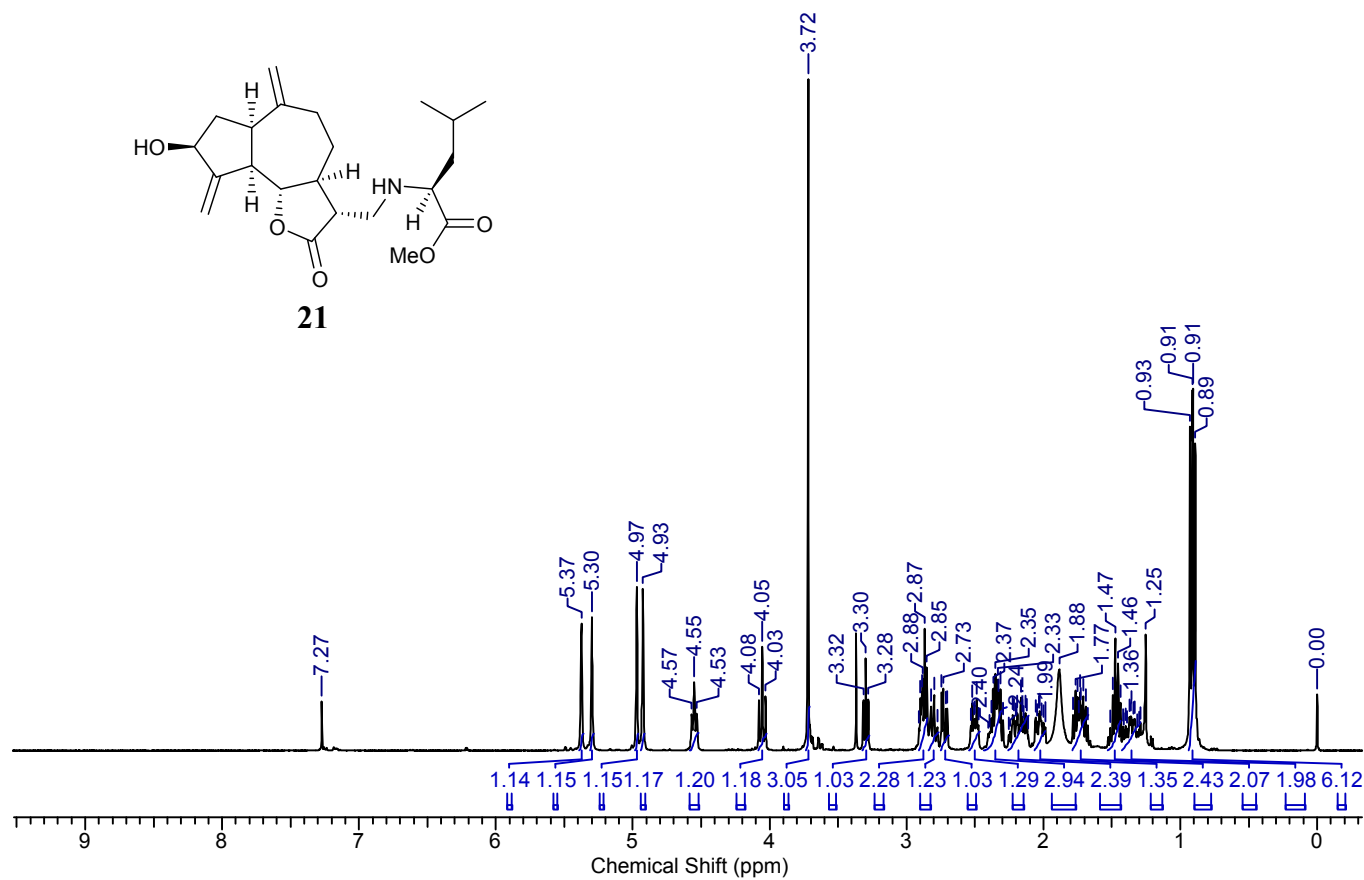

**<sup>13</sup>C NMR of Compound 21 (100 MHz, CDCl<sub>3</sub>)**

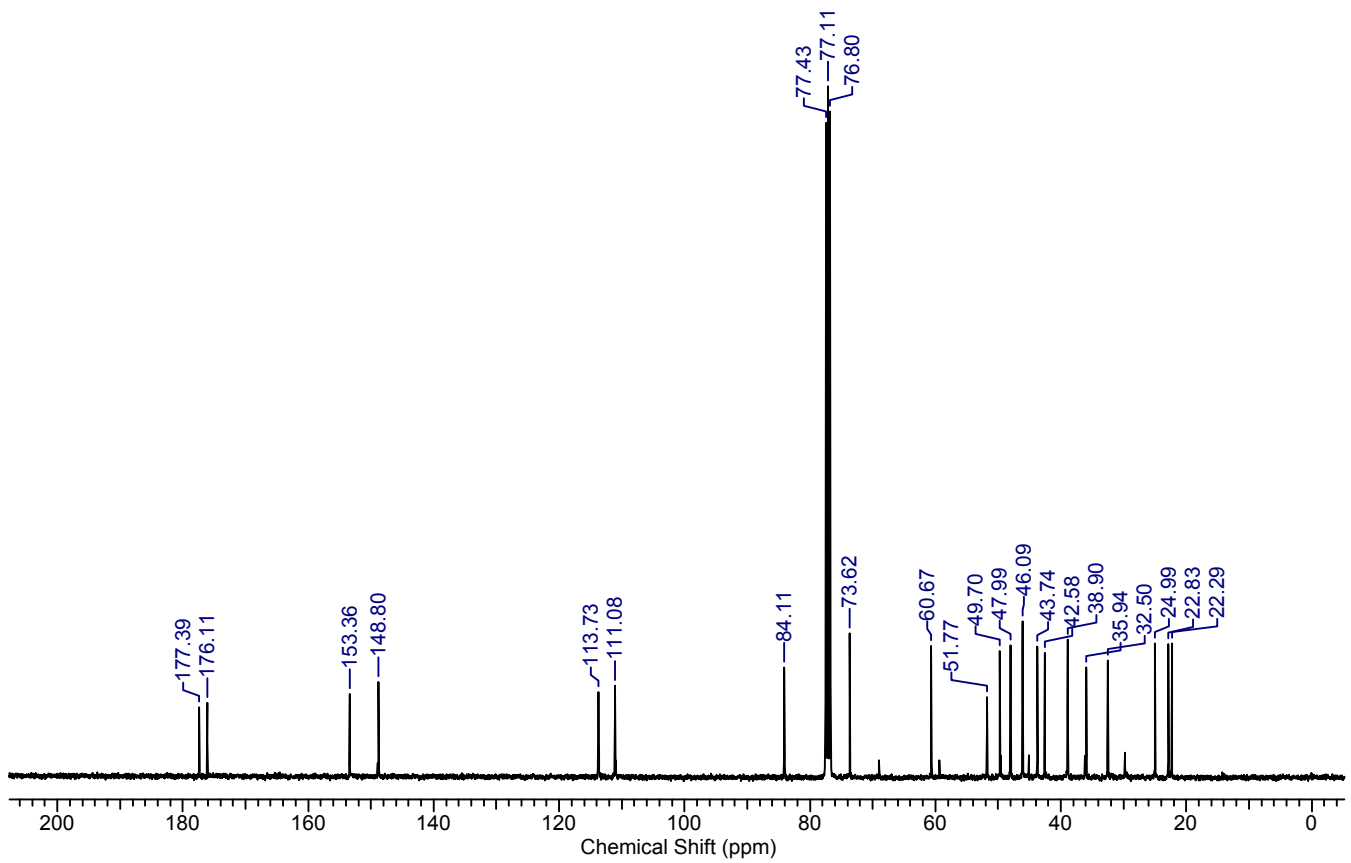

**DEPT of Compound 21 (100 MHz, CDCl<sub>3</sub>)**

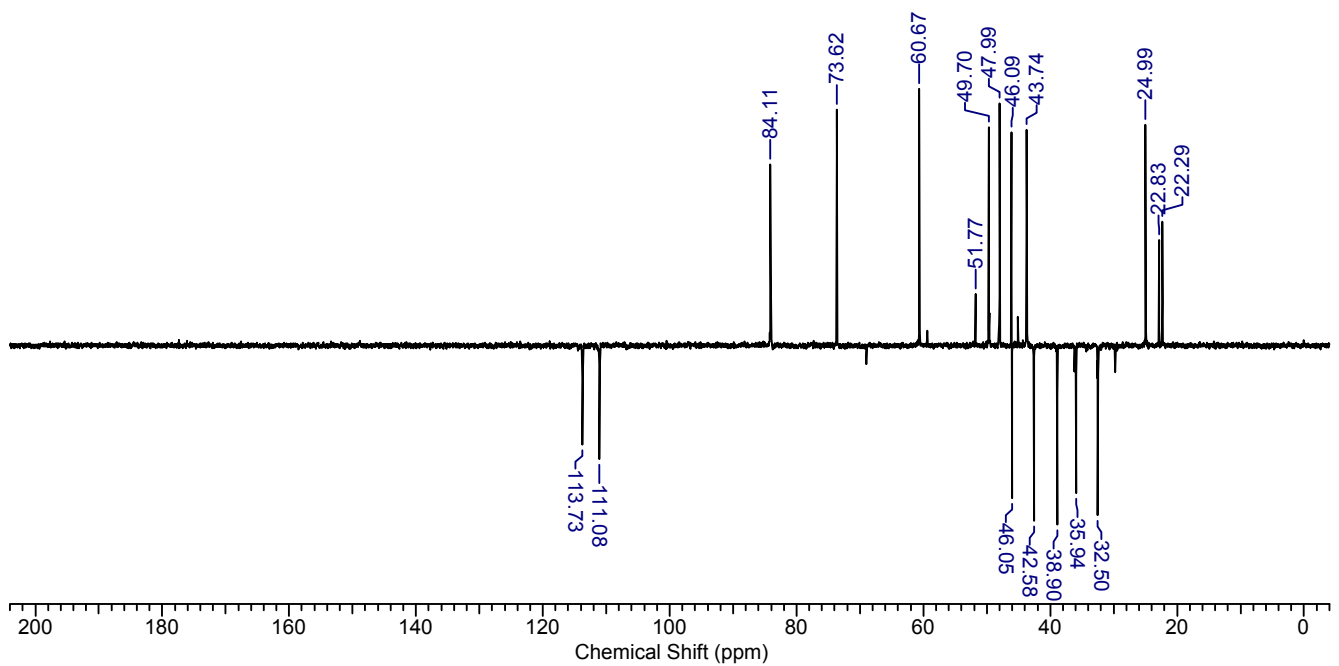

# LC-MS of Compound 21

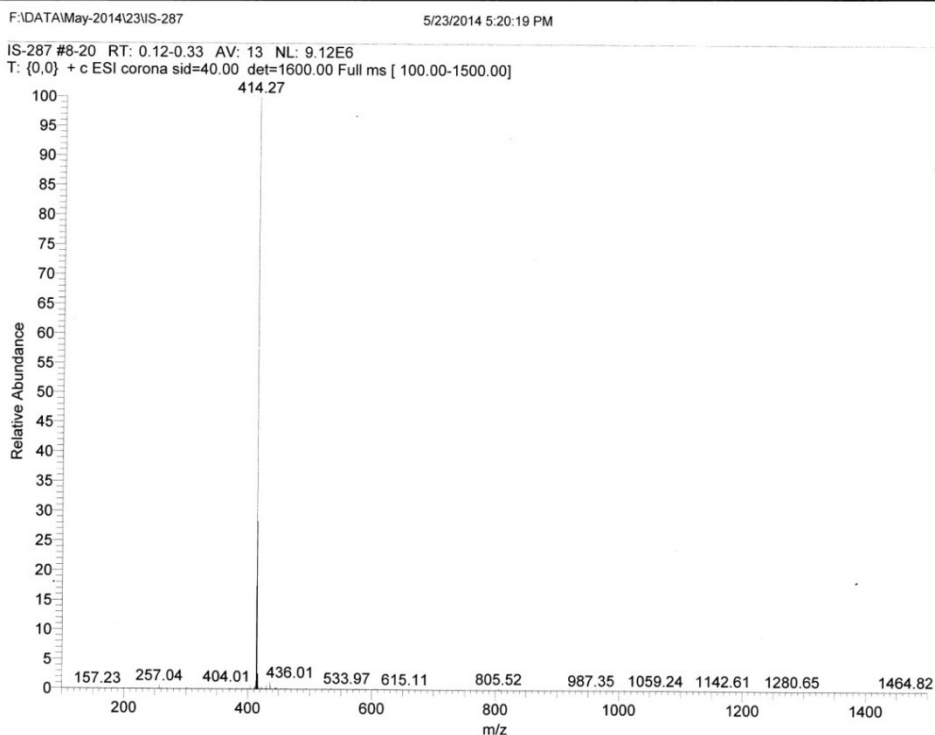

# HR-MS of Compound 21

IS-287-A #89 RT: 0.39 AV: 1 NL: 9.40E9  
T: FTMS + p ESI Full ms [100.00-1500.00]

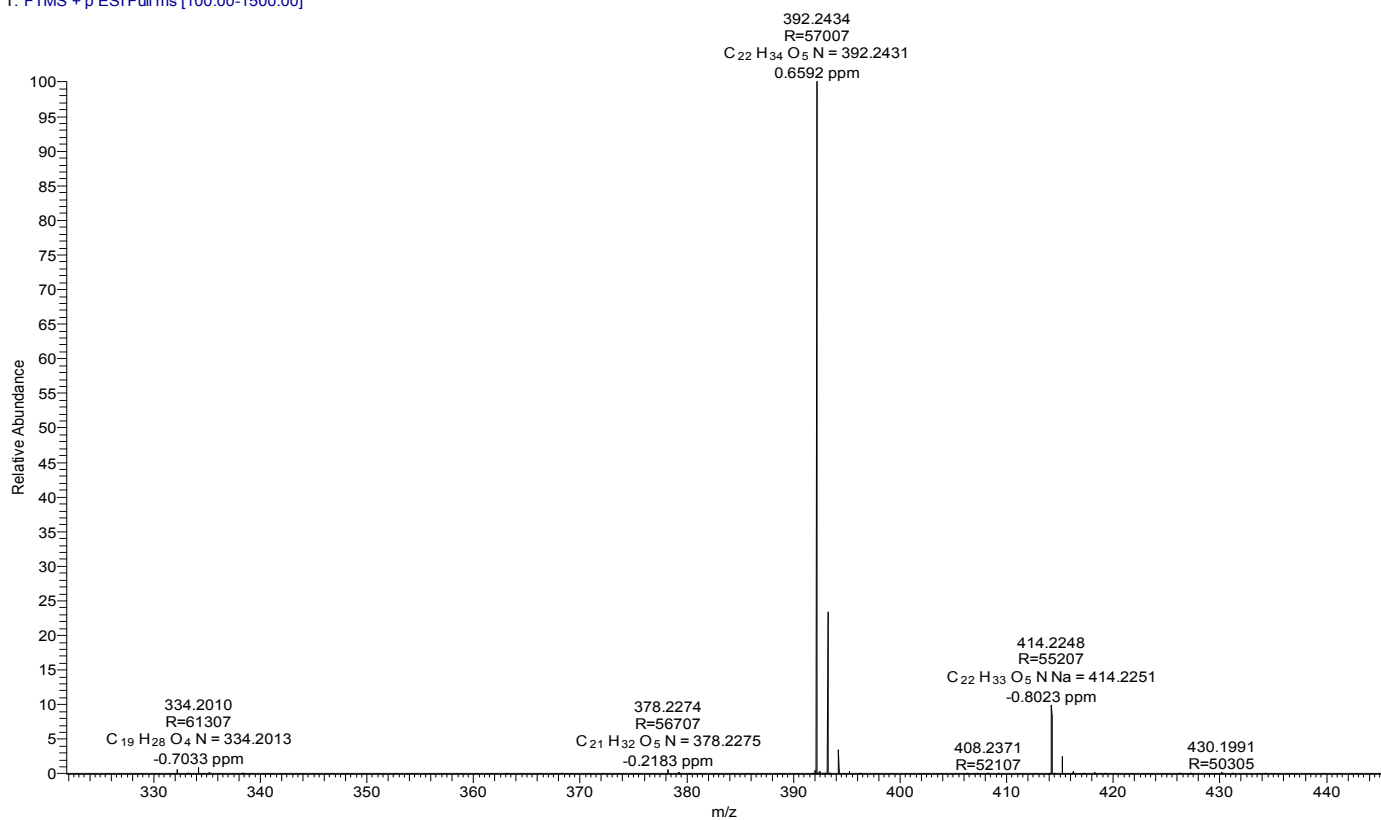

### <sup>1</sup>H NMR of Compound 22 (400 MHz, CDCl<sub>3</sub>)

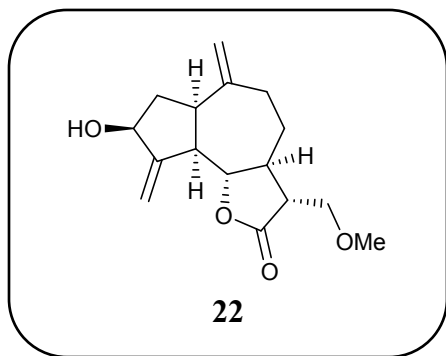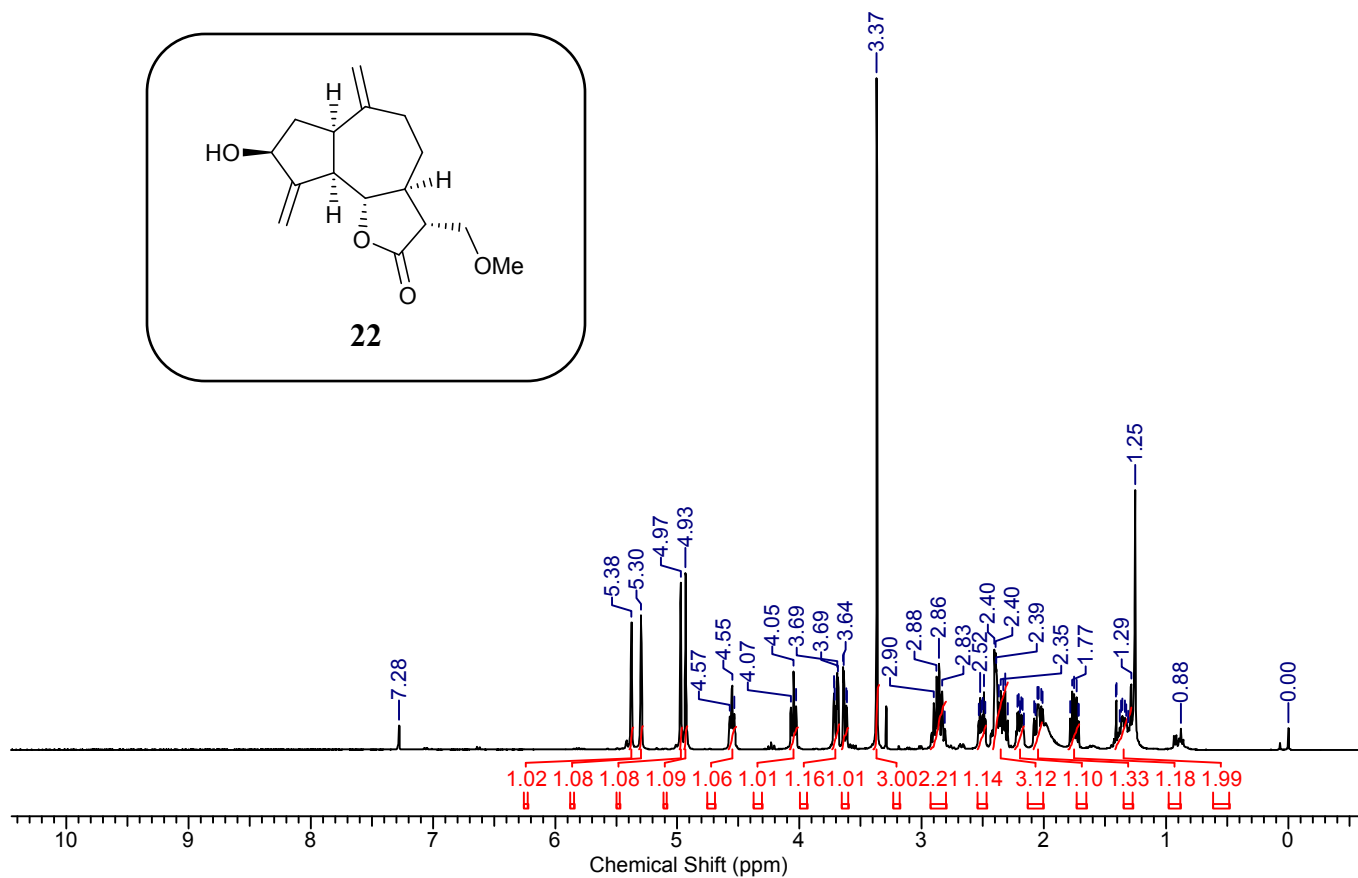

### <sup>13</sup>C NMR of Compound 22 (100 MHz, CDCl<sub>3</sub>)

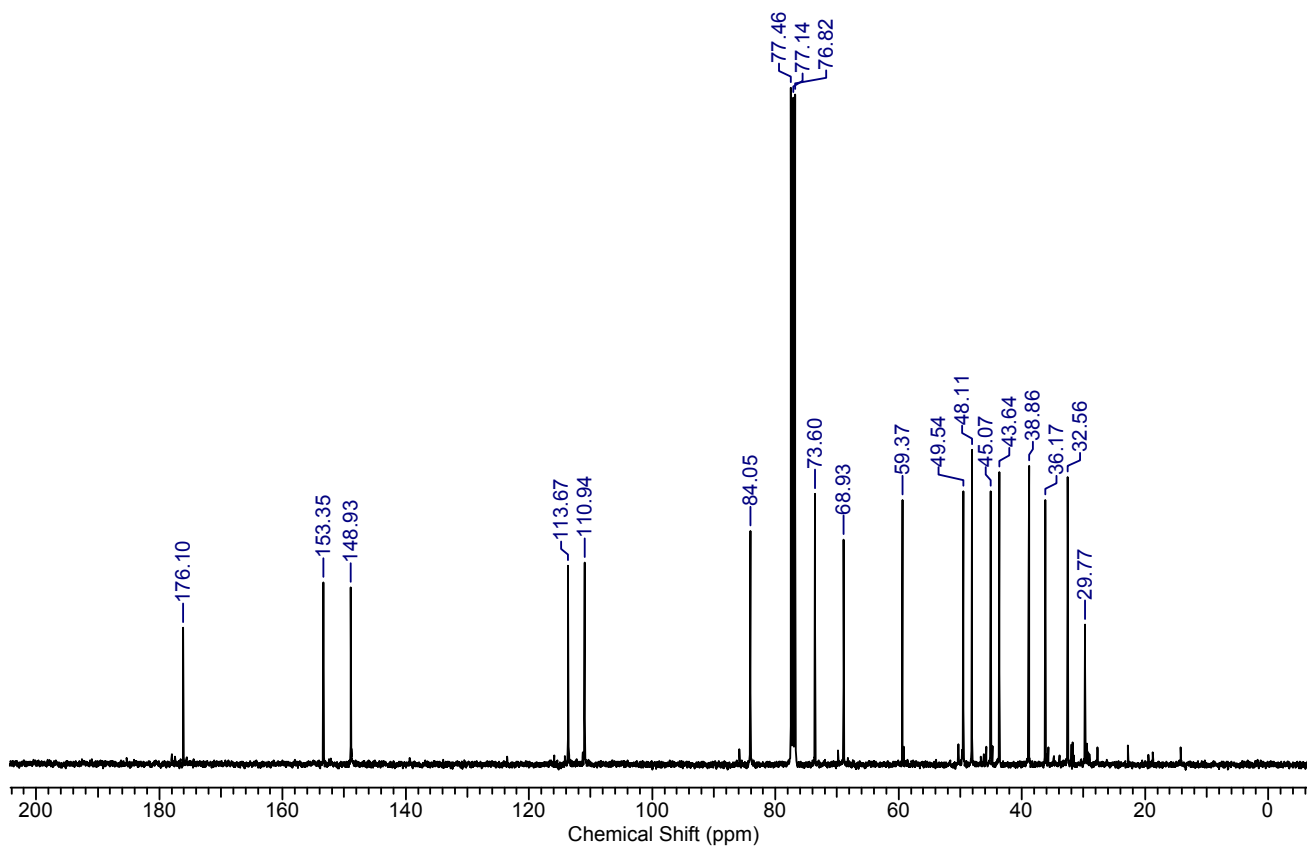

### DEPT of Compound 22 (100 MHz, CDCl<sub>3</sub>)

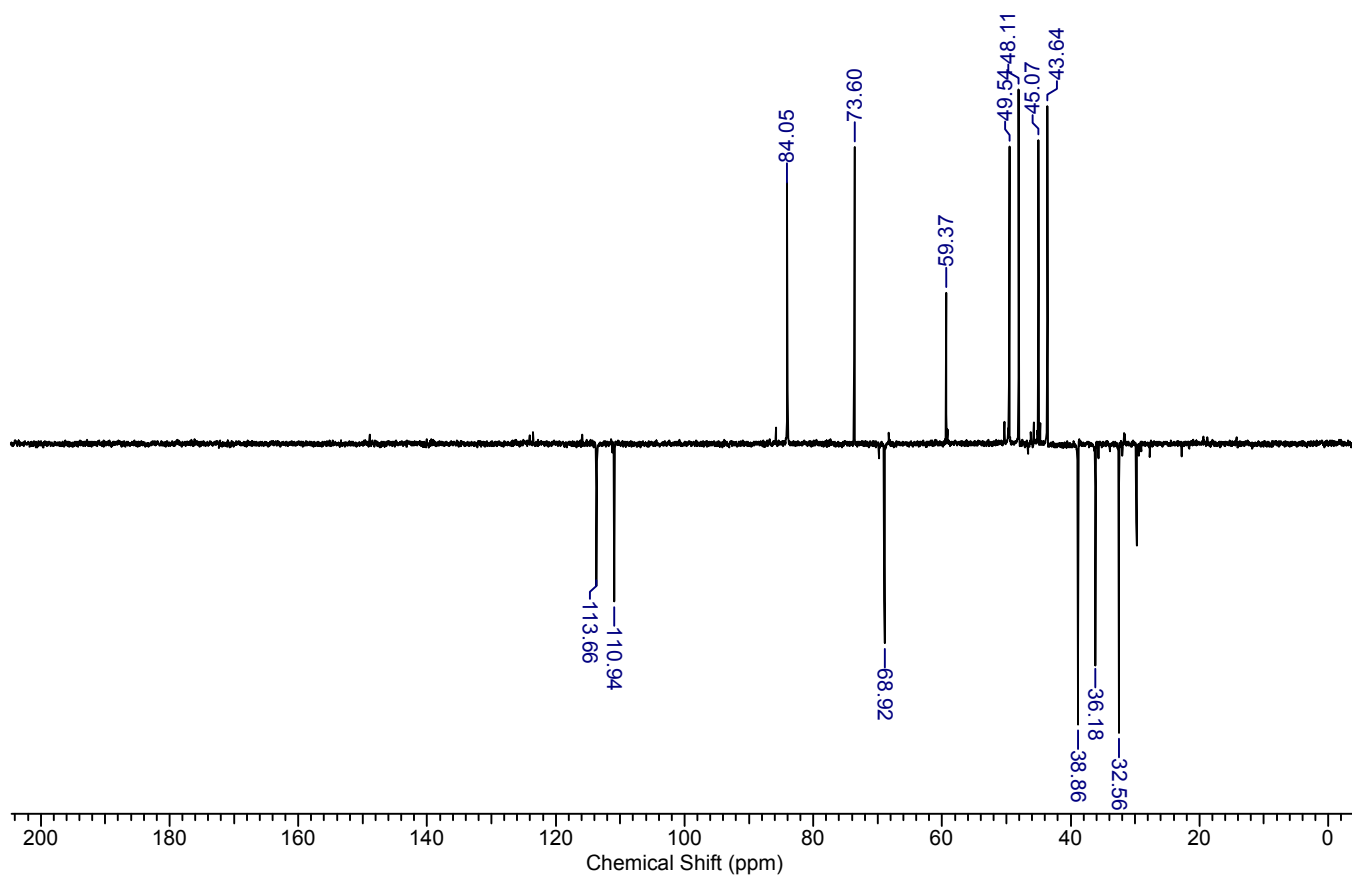

### LC-MS of Compound 22

F:\DATA\May-2014\23\IS-292

5/23/2014 5:14:55 PM

IS-292 #8-19 RT: 0.12-0.32 AV: 12 NL: 1.57E6

T: [0,0] + c ESI corona sid=40.00 det=1600.00 Full ms [ 100.00-1500.00]

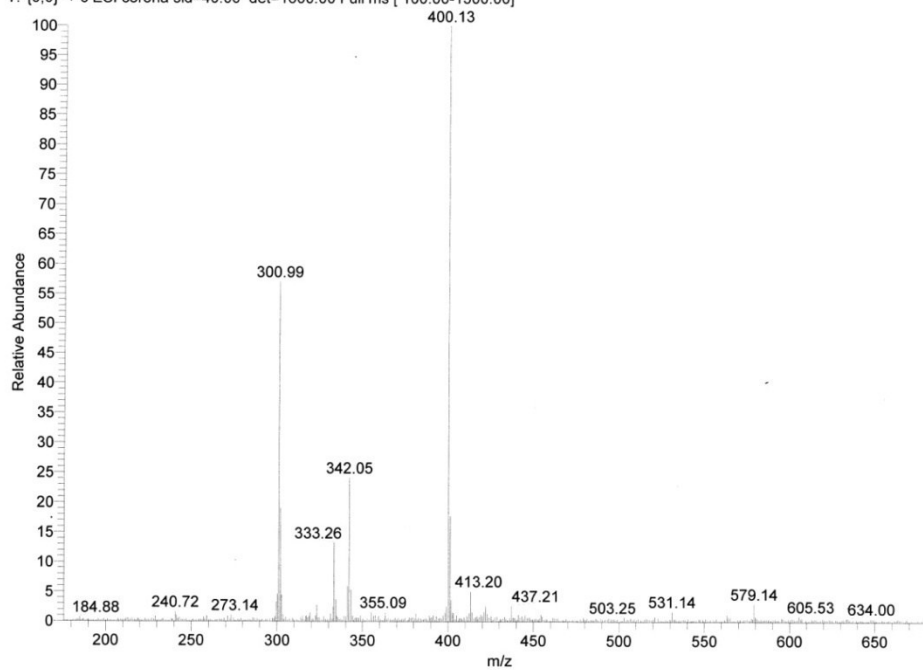



## HR-MS of Compound 22

IS-292 #133 RT: 0.59 AV: 1 NL: 2.85E7  
T: FTMS + p ESI Full ms [100.00-1500.00]

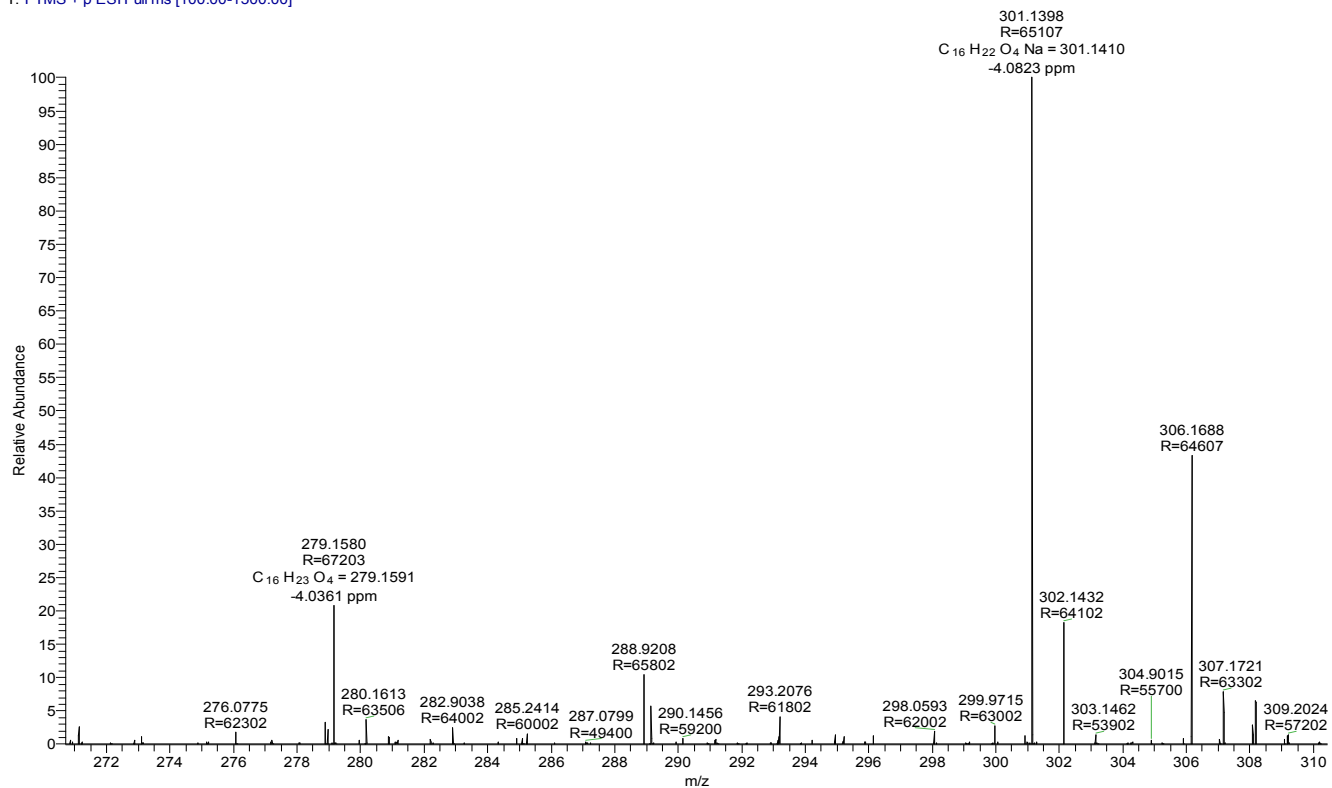

## <sup>1</sup>H NMR of Compound 23 (500 MHz, CDCl<sub>3</sub>)

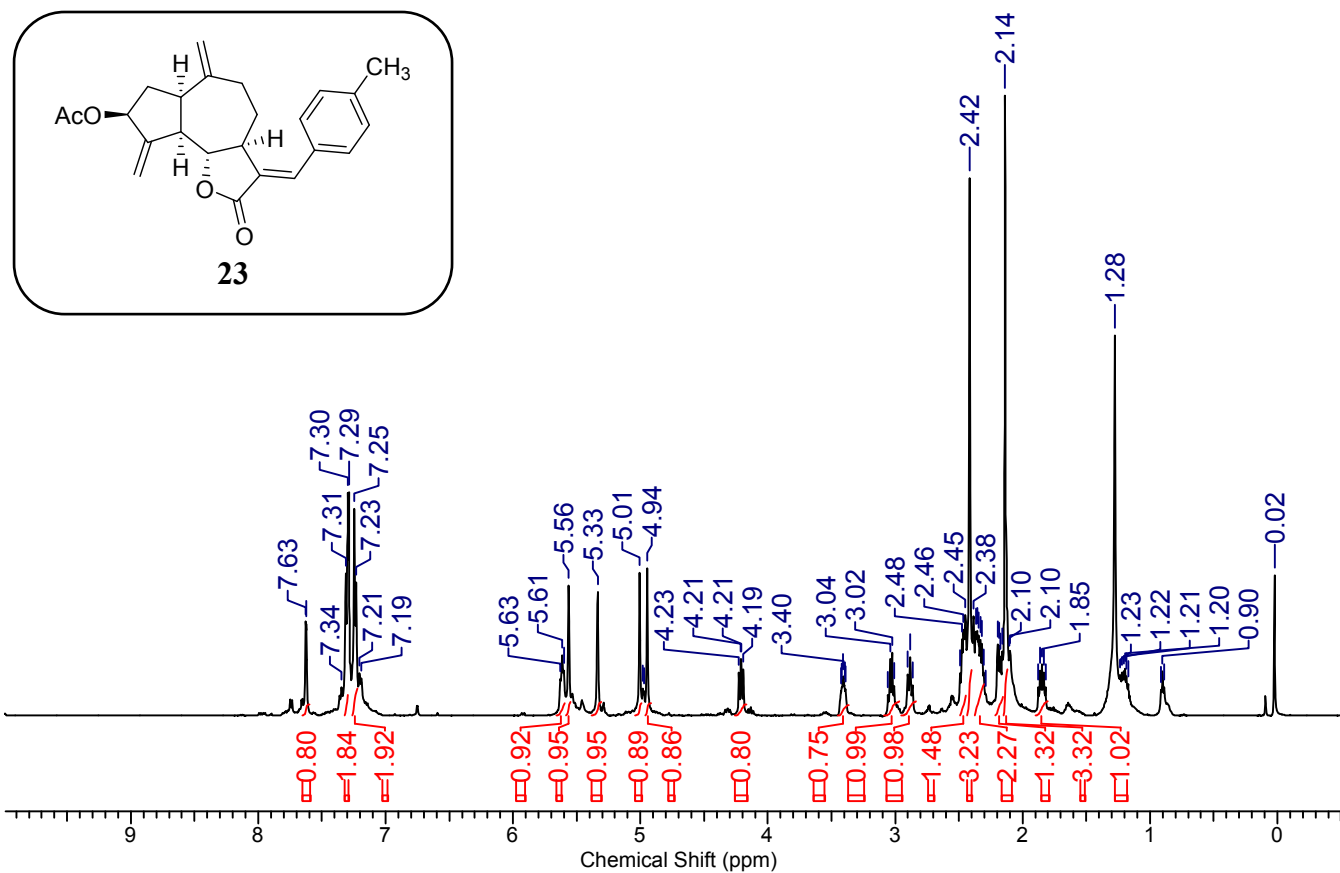

**<sup>13</sup>C NMR of Compound 23 (125 MHz, CDCl<sub>3</sub>)**

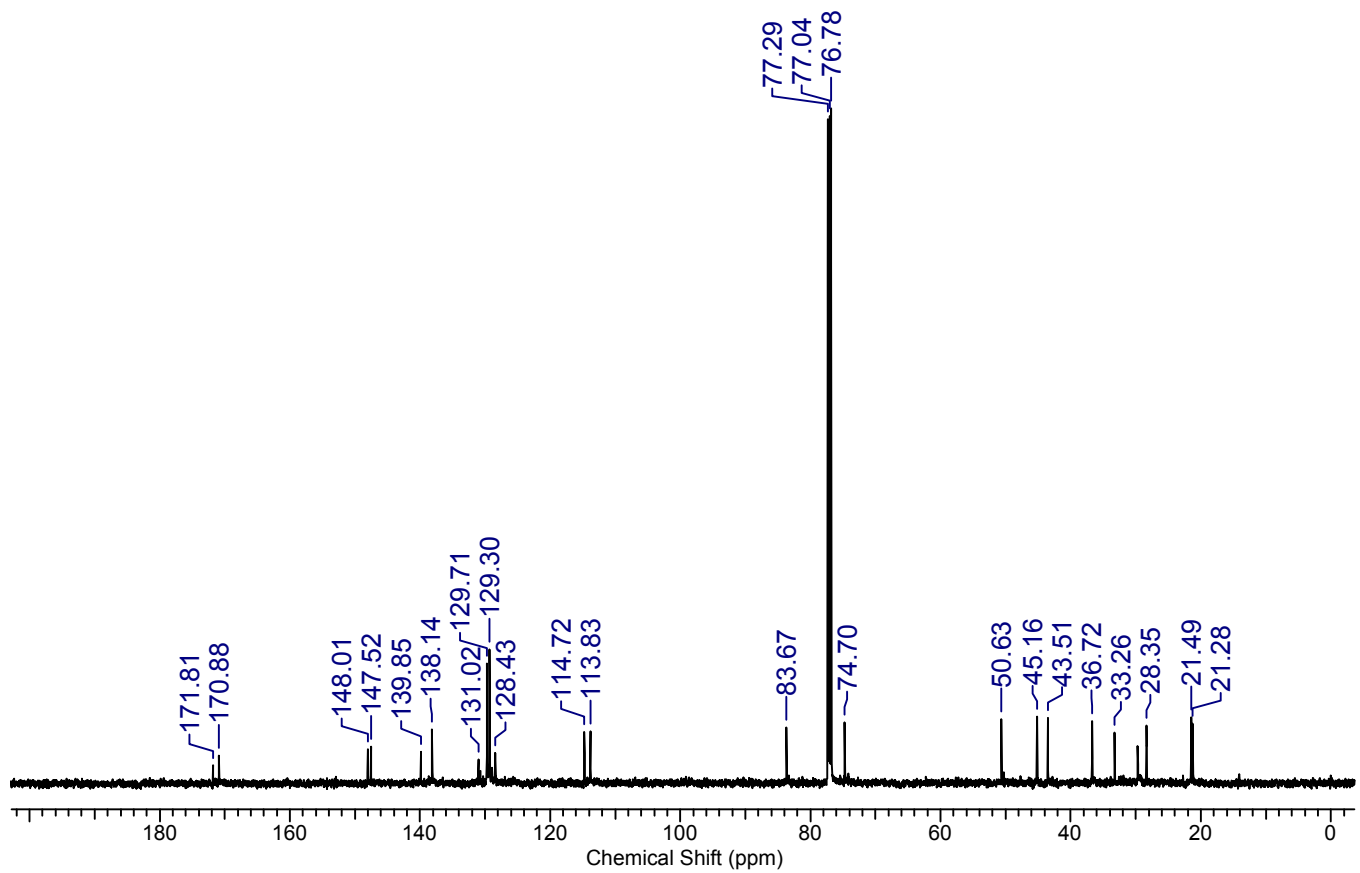

**DEPT of Compound 23 (125 MHz, CDCl<sub>3</sub>)**

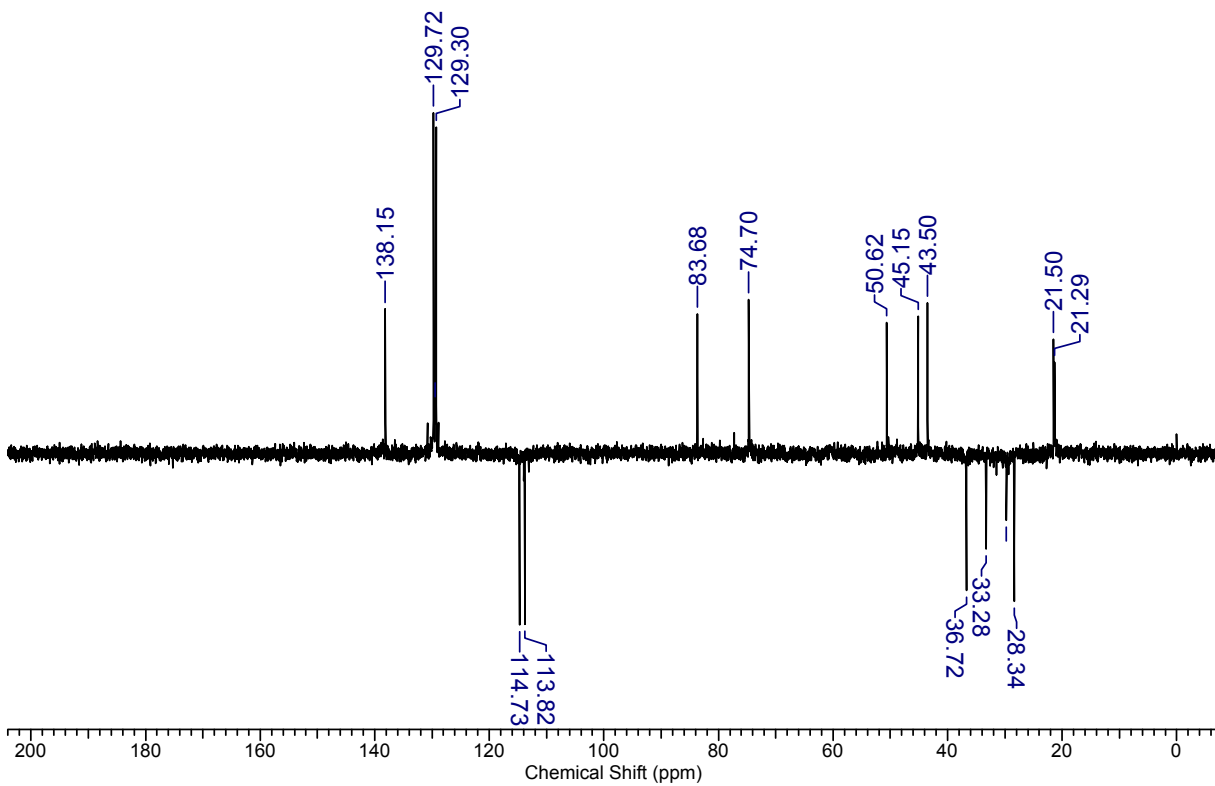

# HR-MS of Compound 23

D:\Data\IS-341

12/4/2014 11:54:05 AM

IS-341 #1150 RT: 5.12 AV: 1 NL: 9.63E7  
T: FTMS + p ESI Full ms [66.70-1000.00]

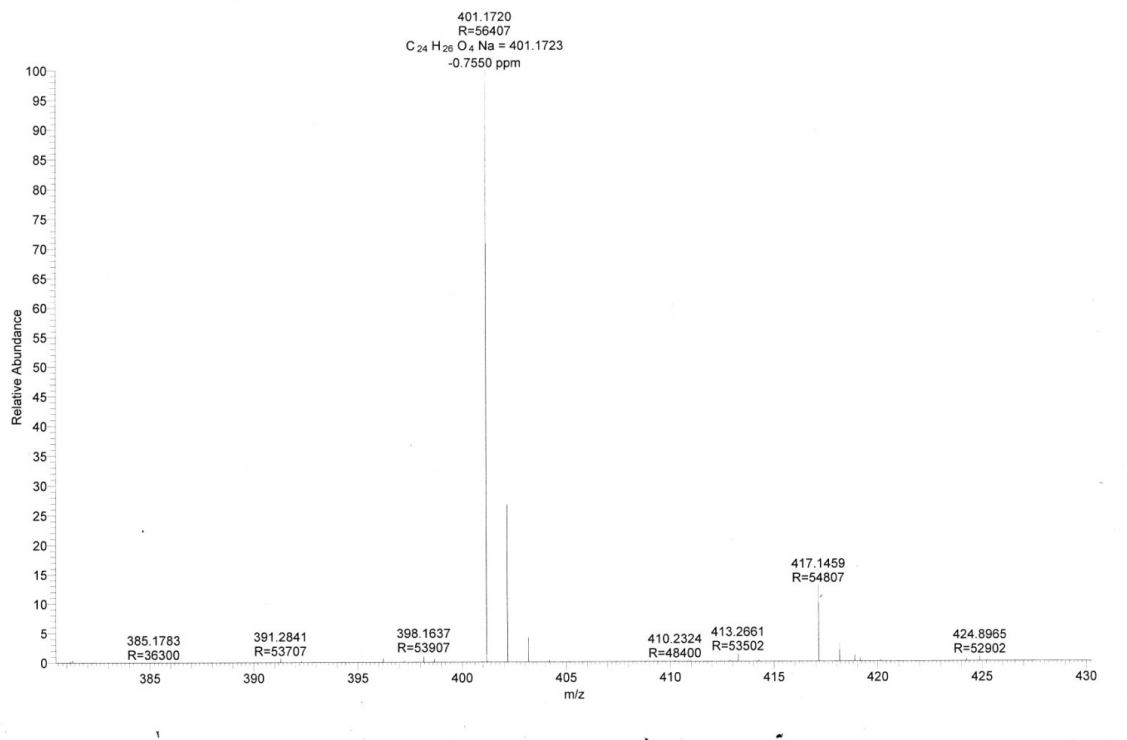

# <sup>1</sup>H NMR of Compound 24 (400 MHz, CDCl<sub>3</sub>)

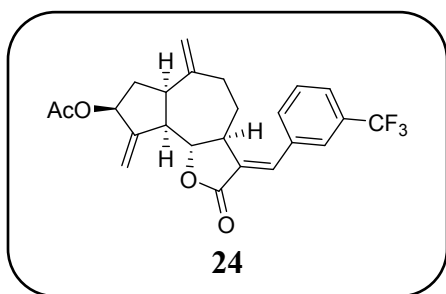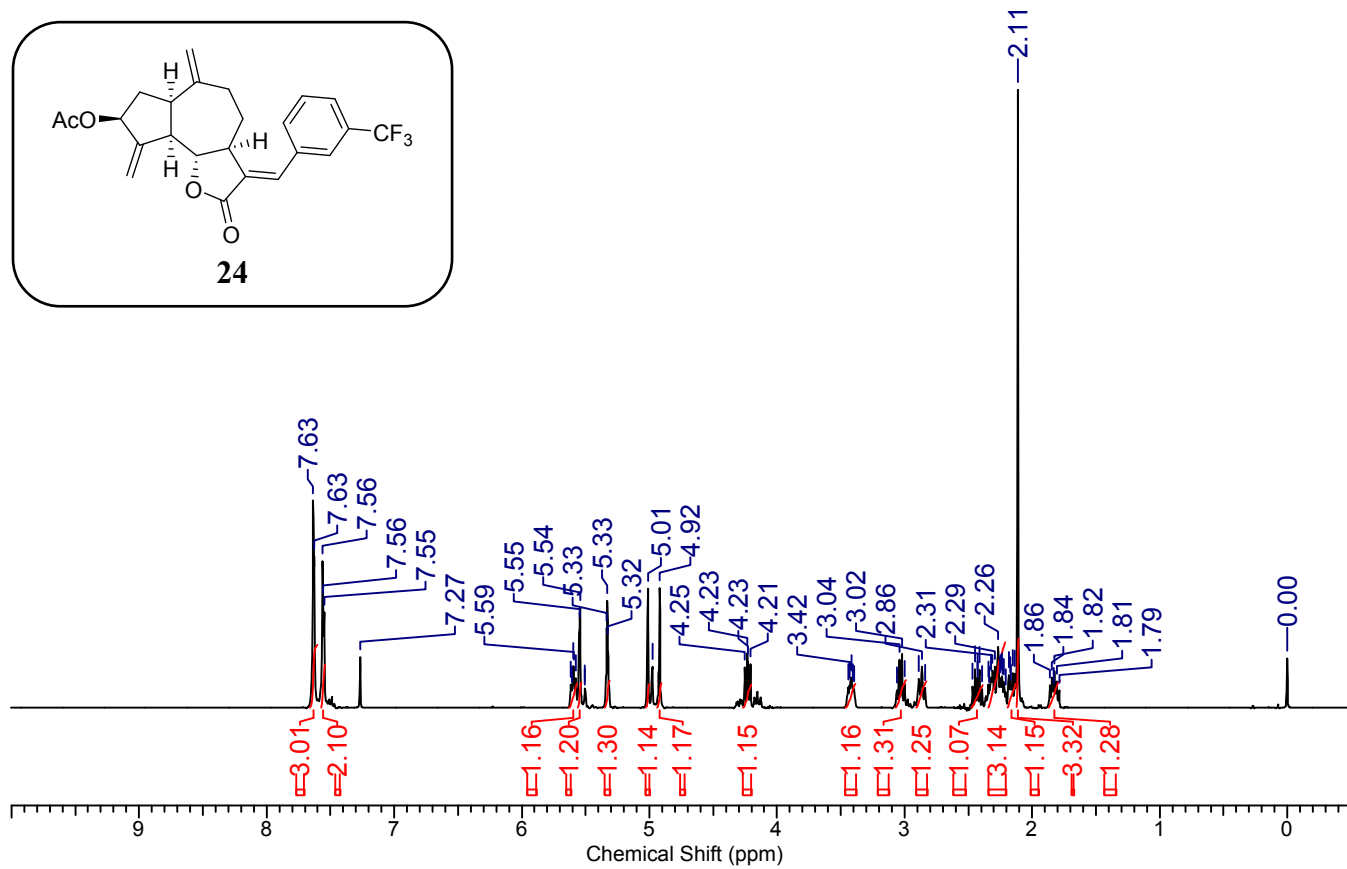

**$^{13}\text{C}$  NMR of Compound 24 (100 MHz,  $\text{CDCl}_3$ )**

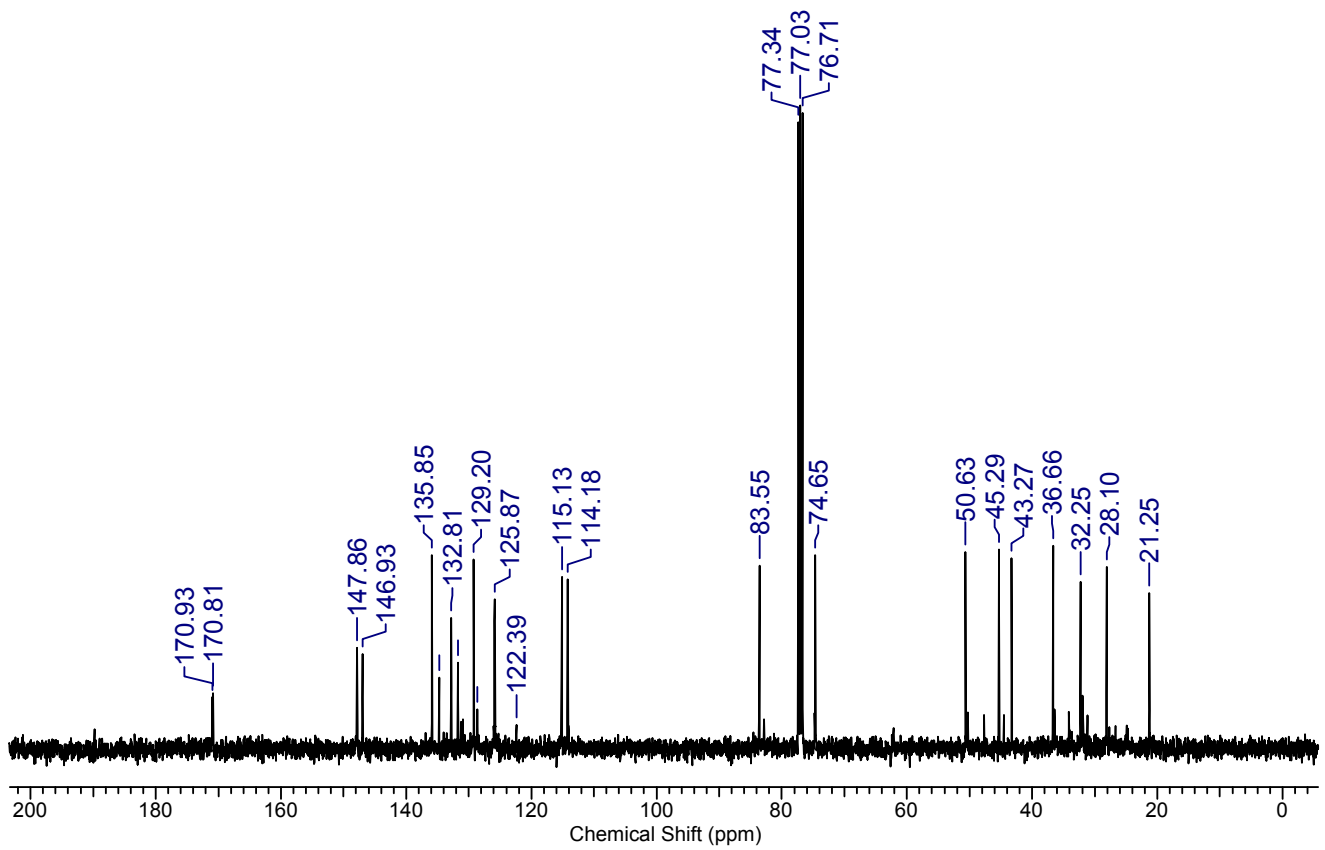

**DEPT of Compound 24 (100 MHz,  $\text{CDCl}_3$ )**

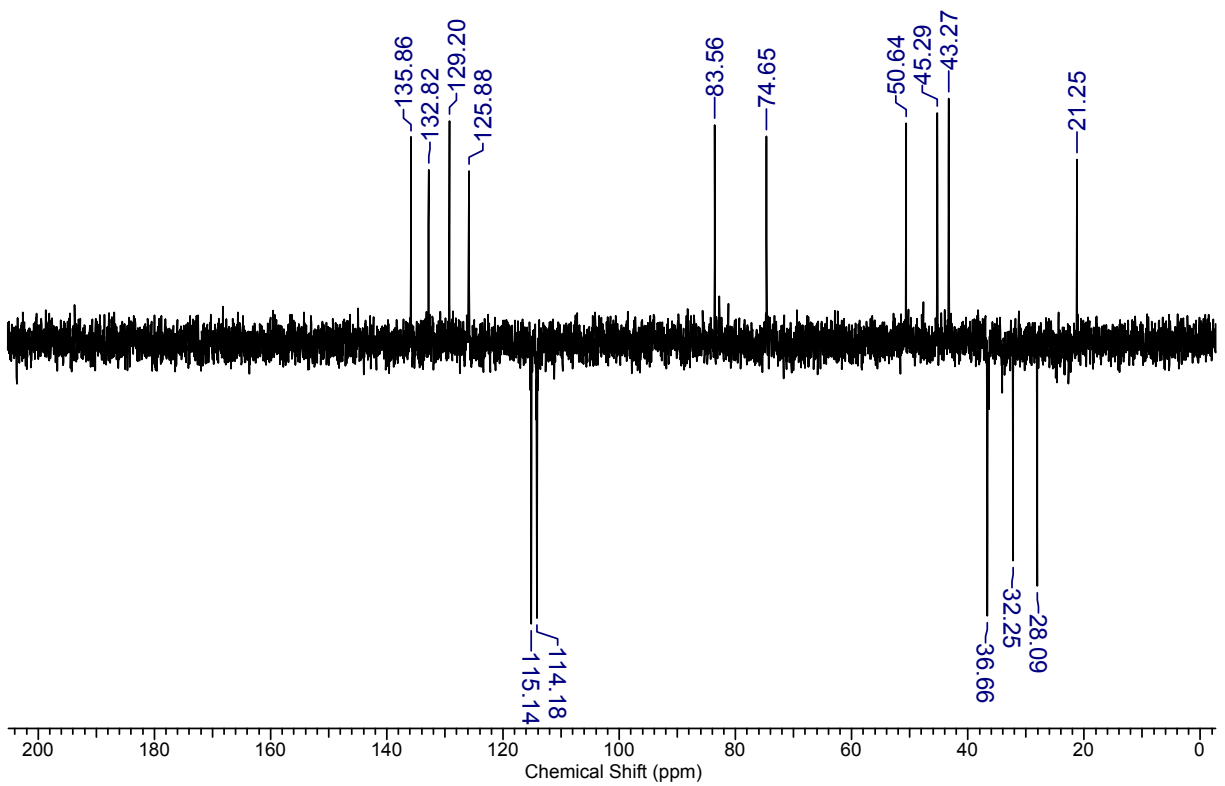

## HR-MS of Compound 24

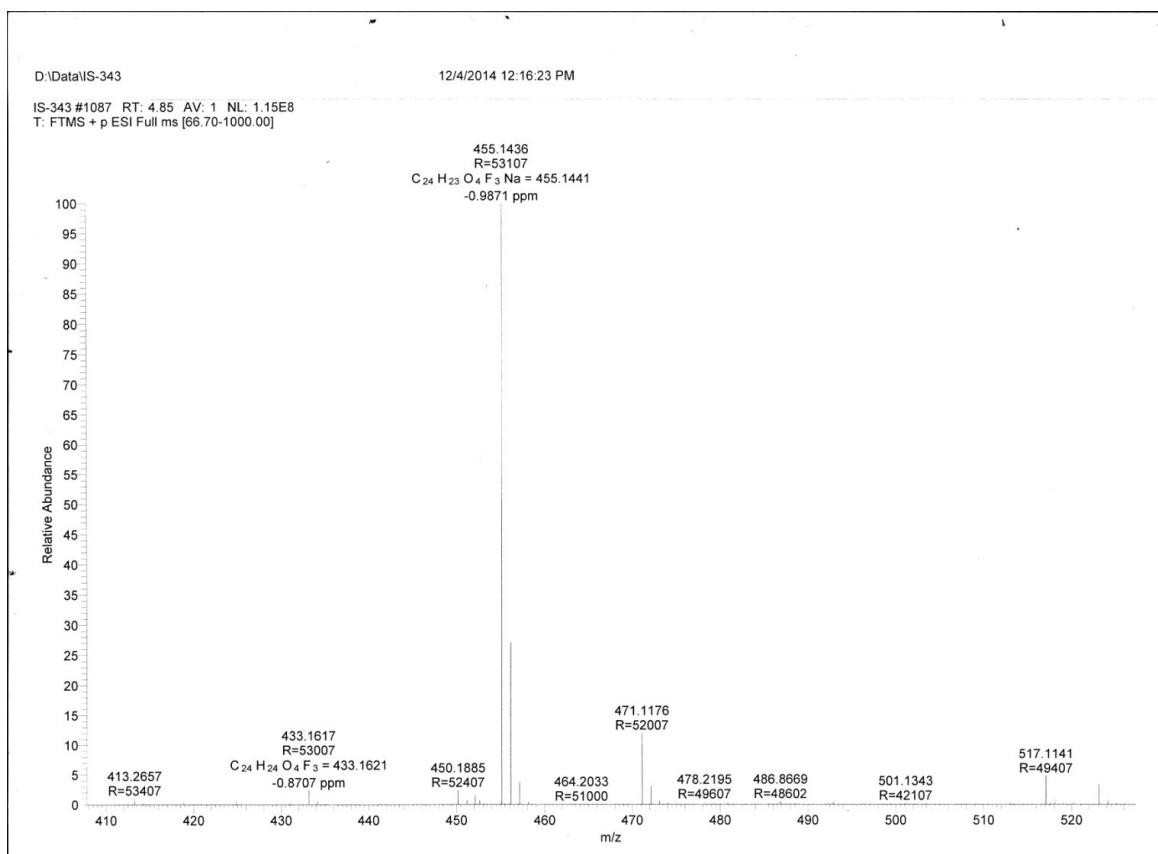

## <sup>1</sup>H NMR of Compound 25 (400 MHz, CDCl<sub>3</sub>)

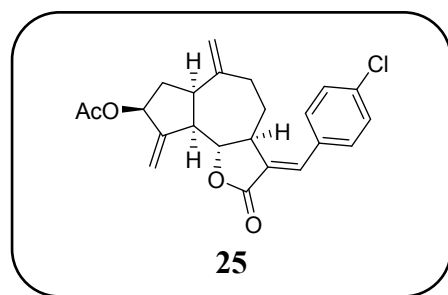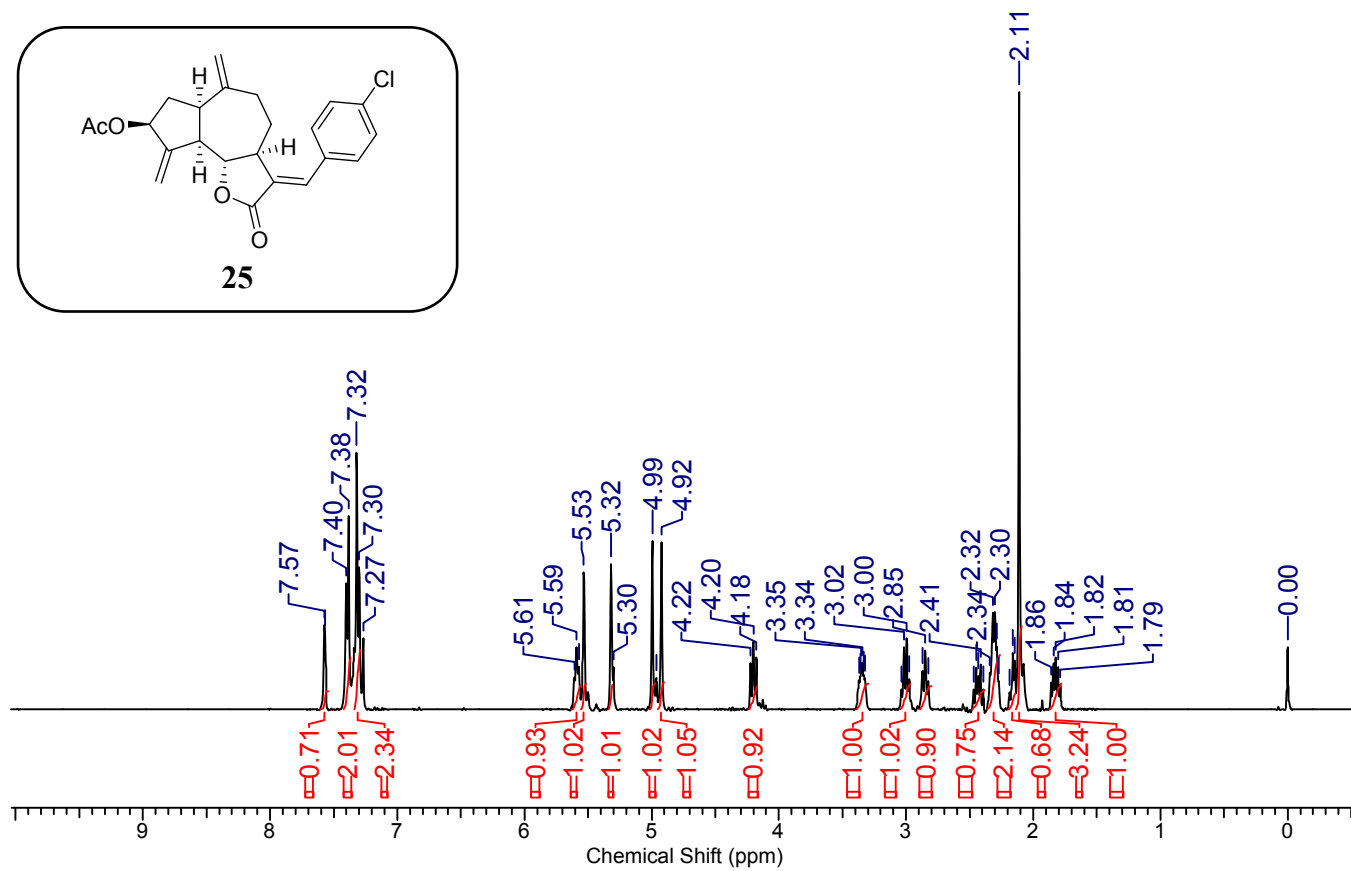

**<sup>13</sup>C NMR of Compound 25 (100 MHz, CDCl<sub>3</sub>)**

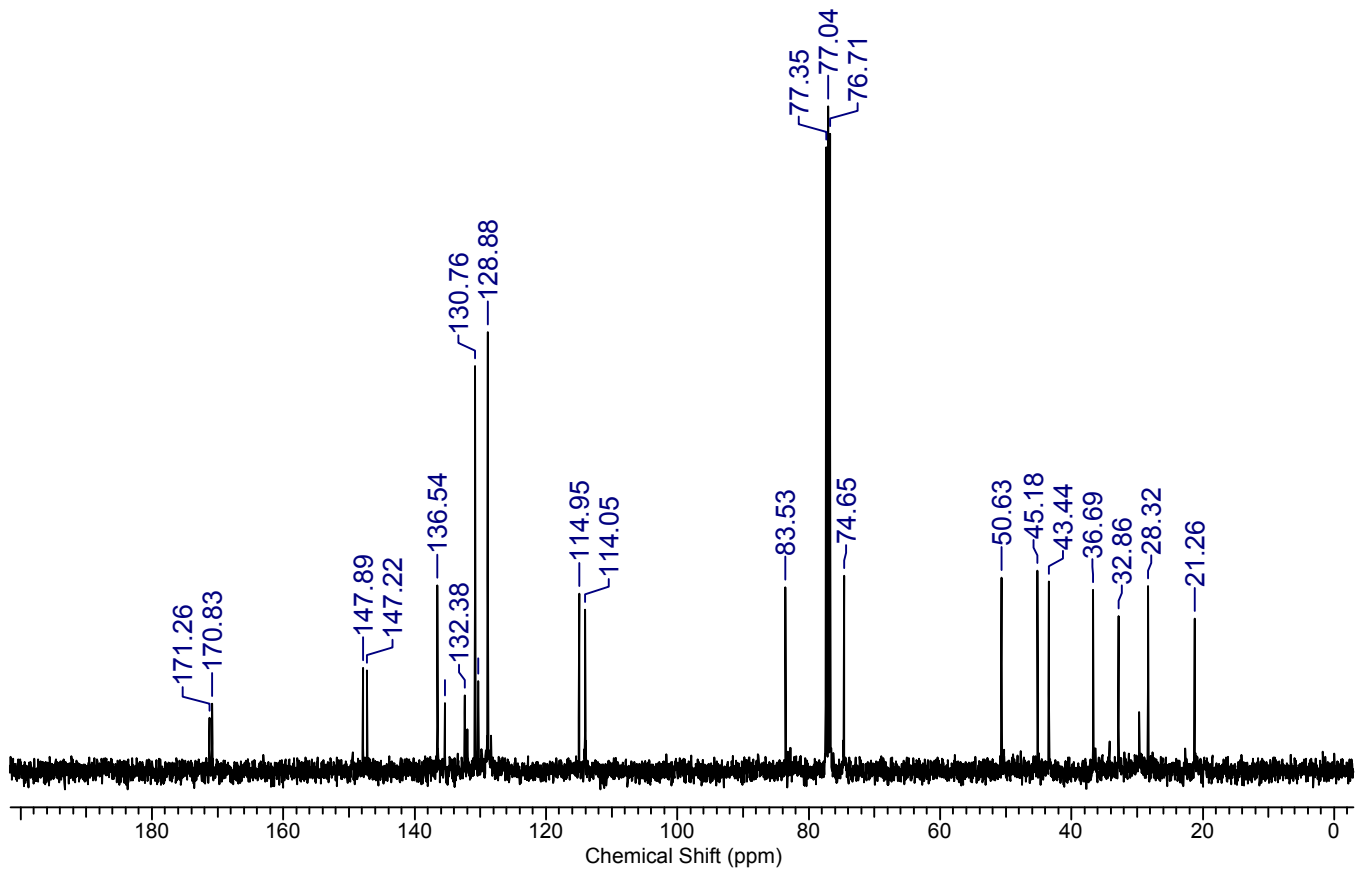

**DEPT of Compound 25 (100 MHz, CDCl<sub>3</sub>)**

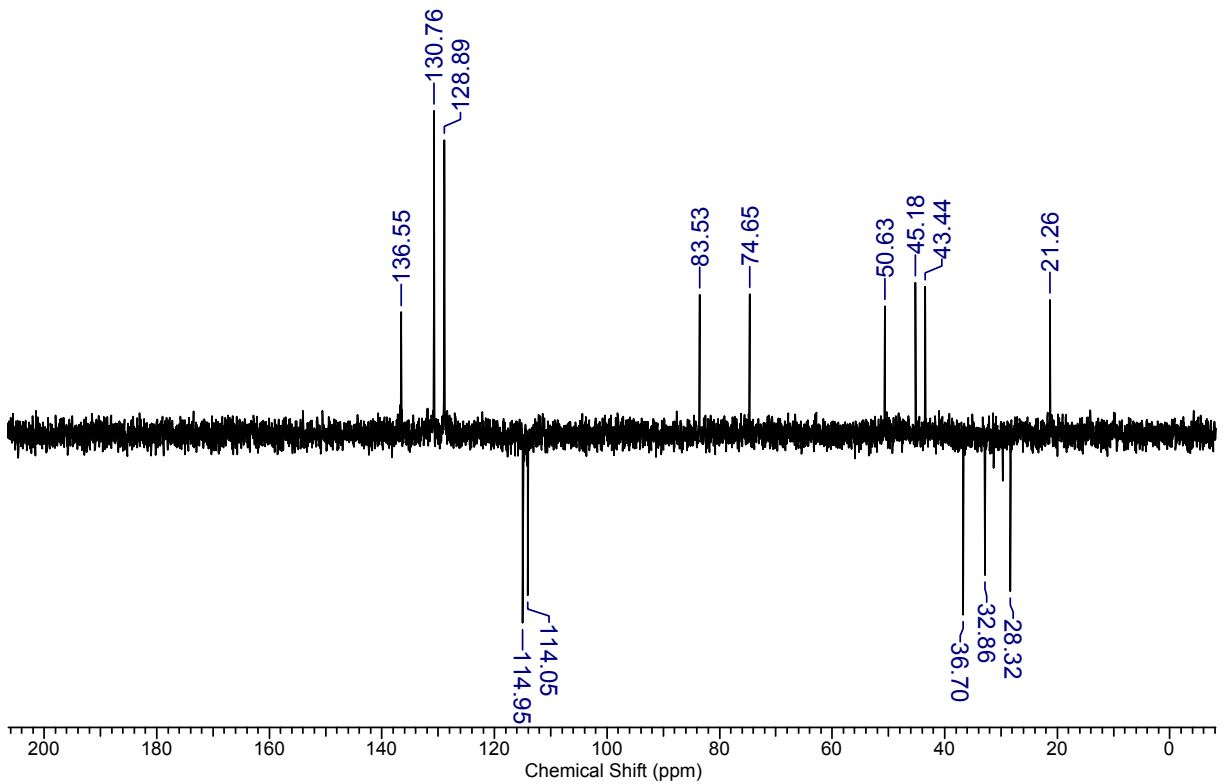

# HR-MS of Compound 25

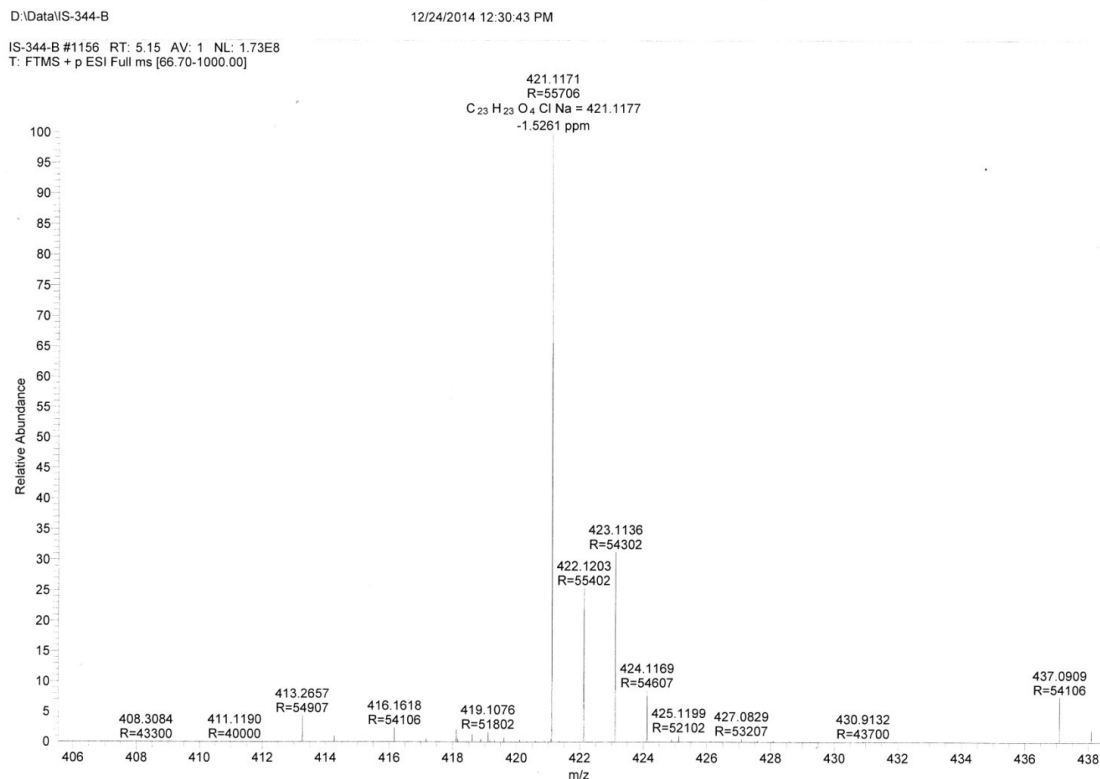

# $^1H$ NMR of Compound 26 (400 MHz, $CDCl_3$ )

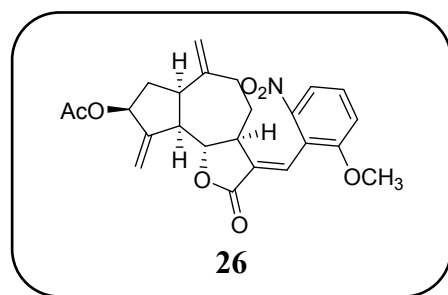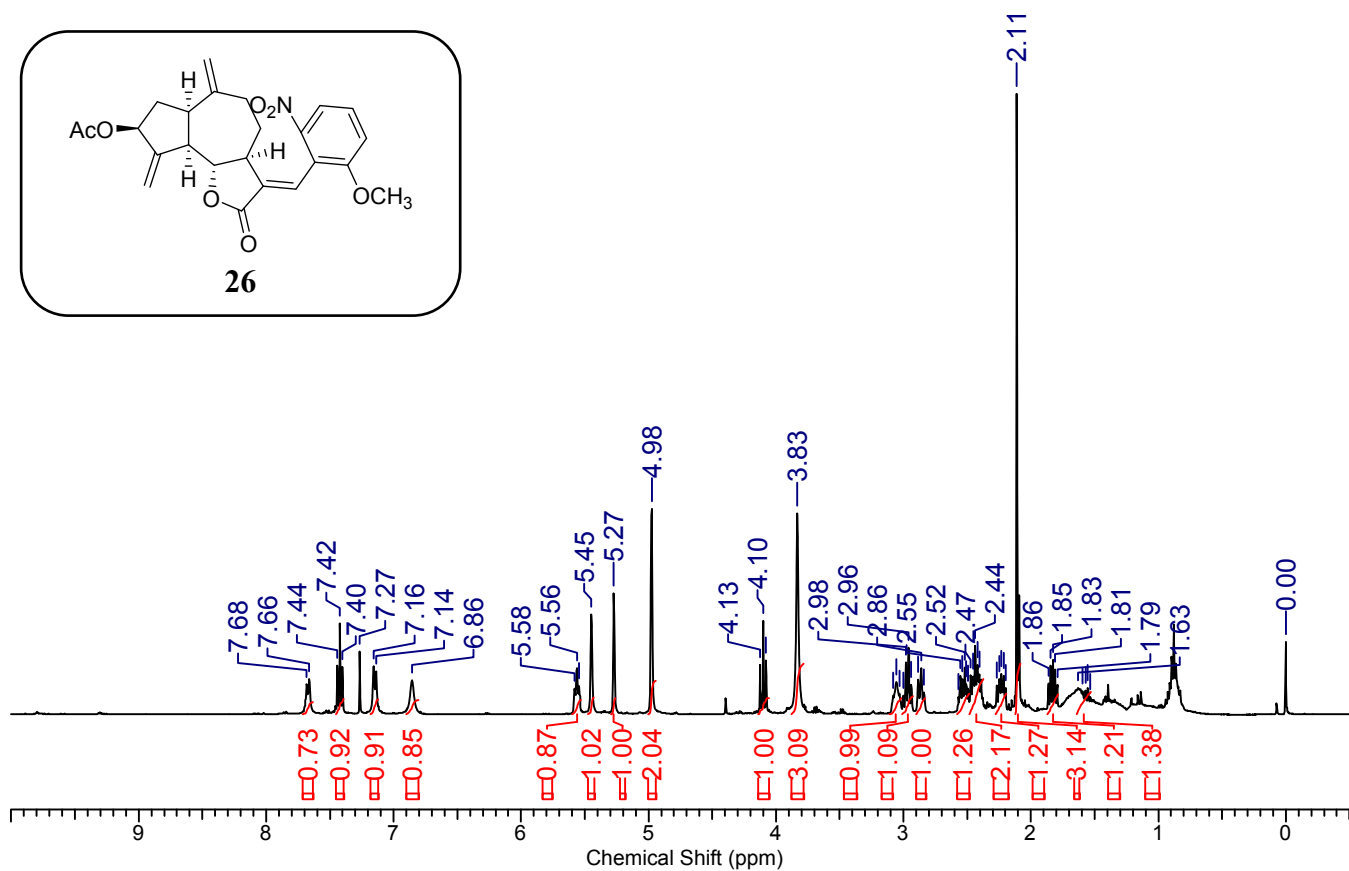

<sup>13</sup>C NMR of Compound 26 (100 MHz, CDCl<sub>3</sub>)

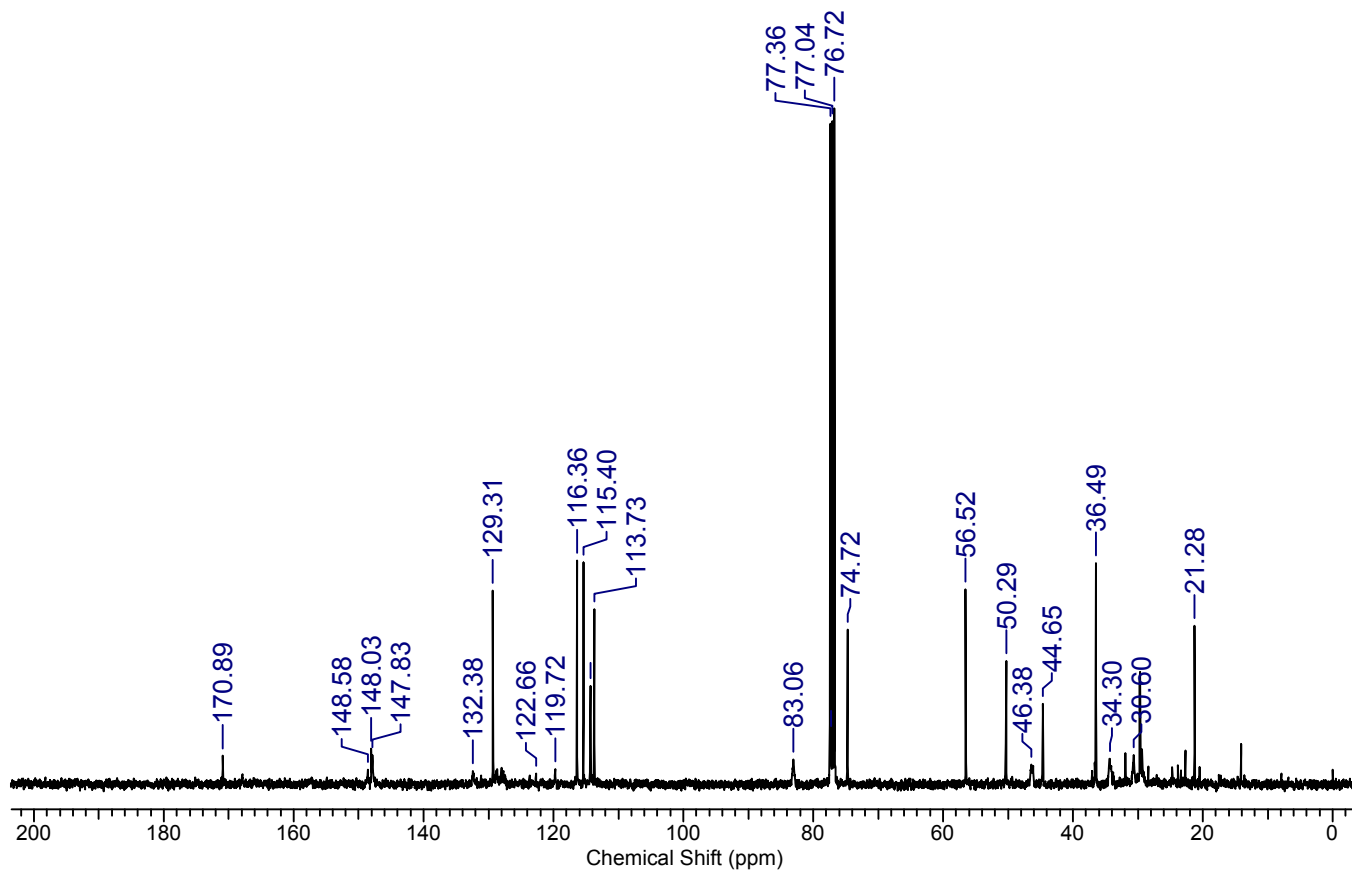

DEPT of Compound 26 (100 MHz, CDCl<sub>3</sub>)

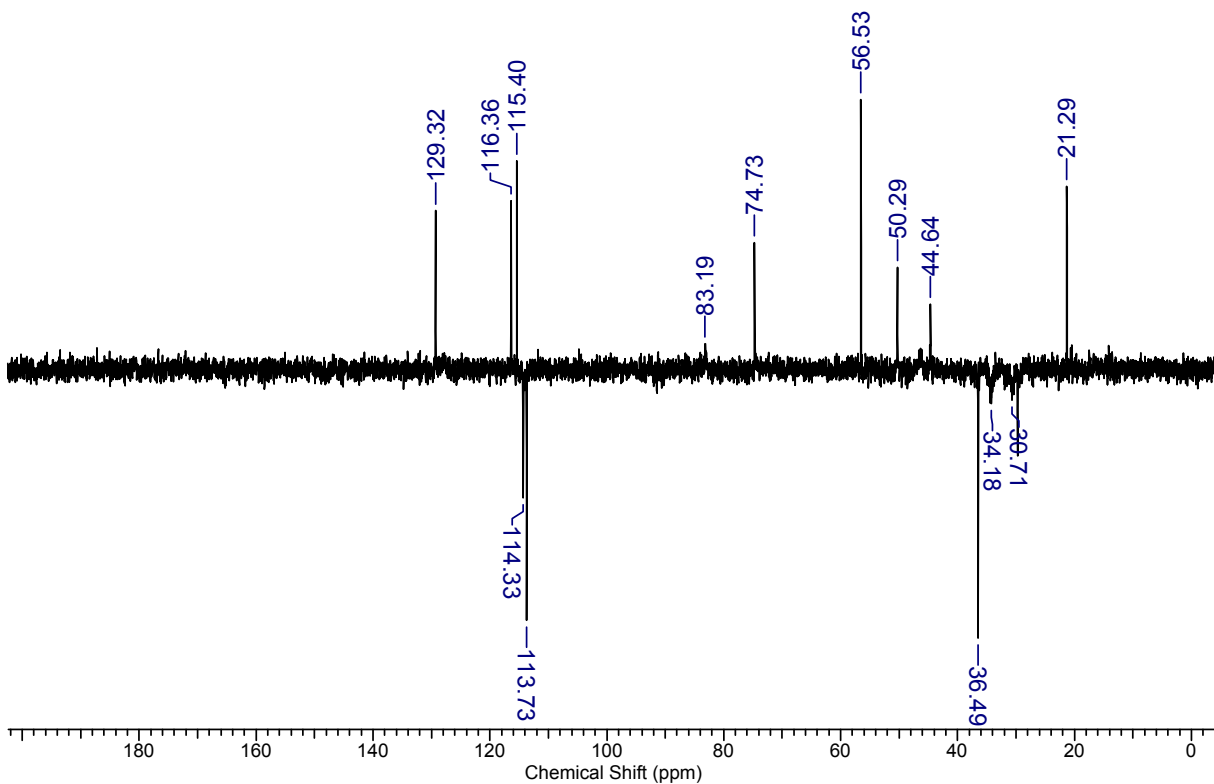



## HR-MS of Compound 26

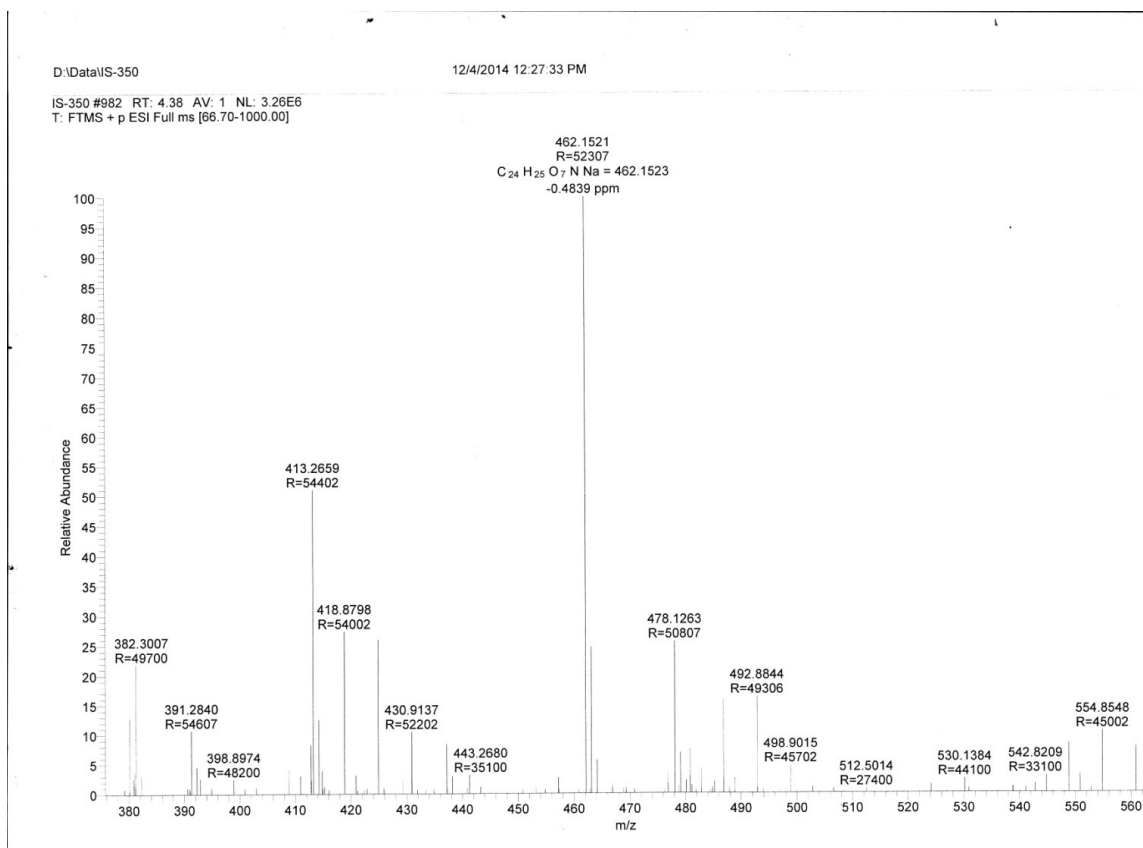

## <sup>1</sup>H NMR of Compound 27 (400 MHz, CDCl<sub>3</sub>)

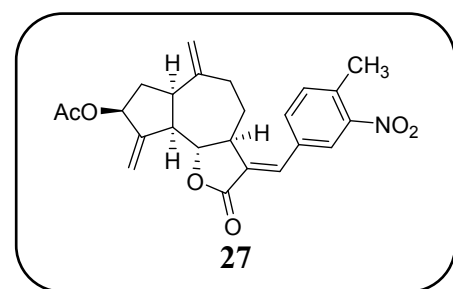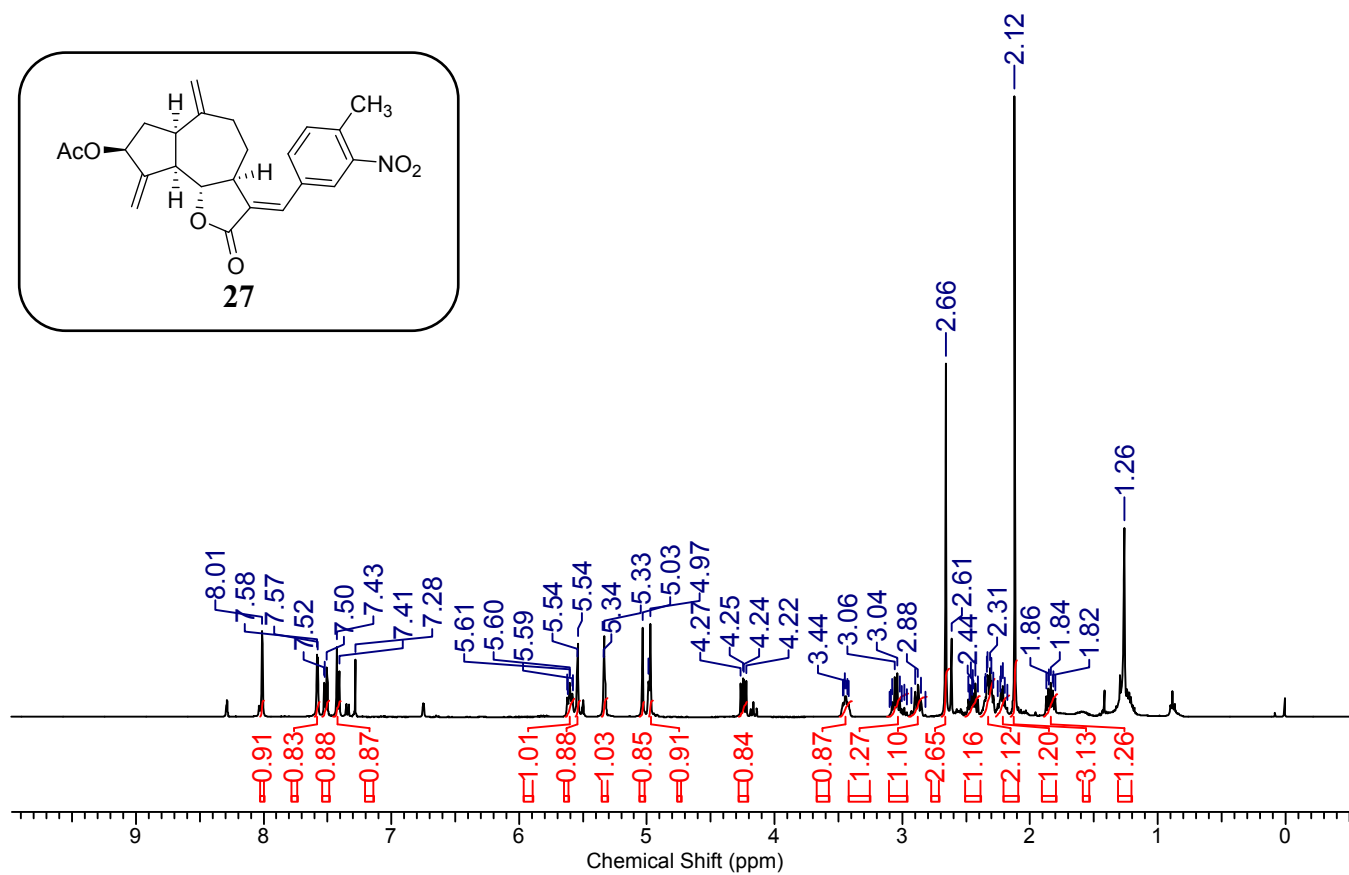

**<sup>13</sup>C NMR of Compound 27 (100 MHz, CDCl<sub>3</sub>)**

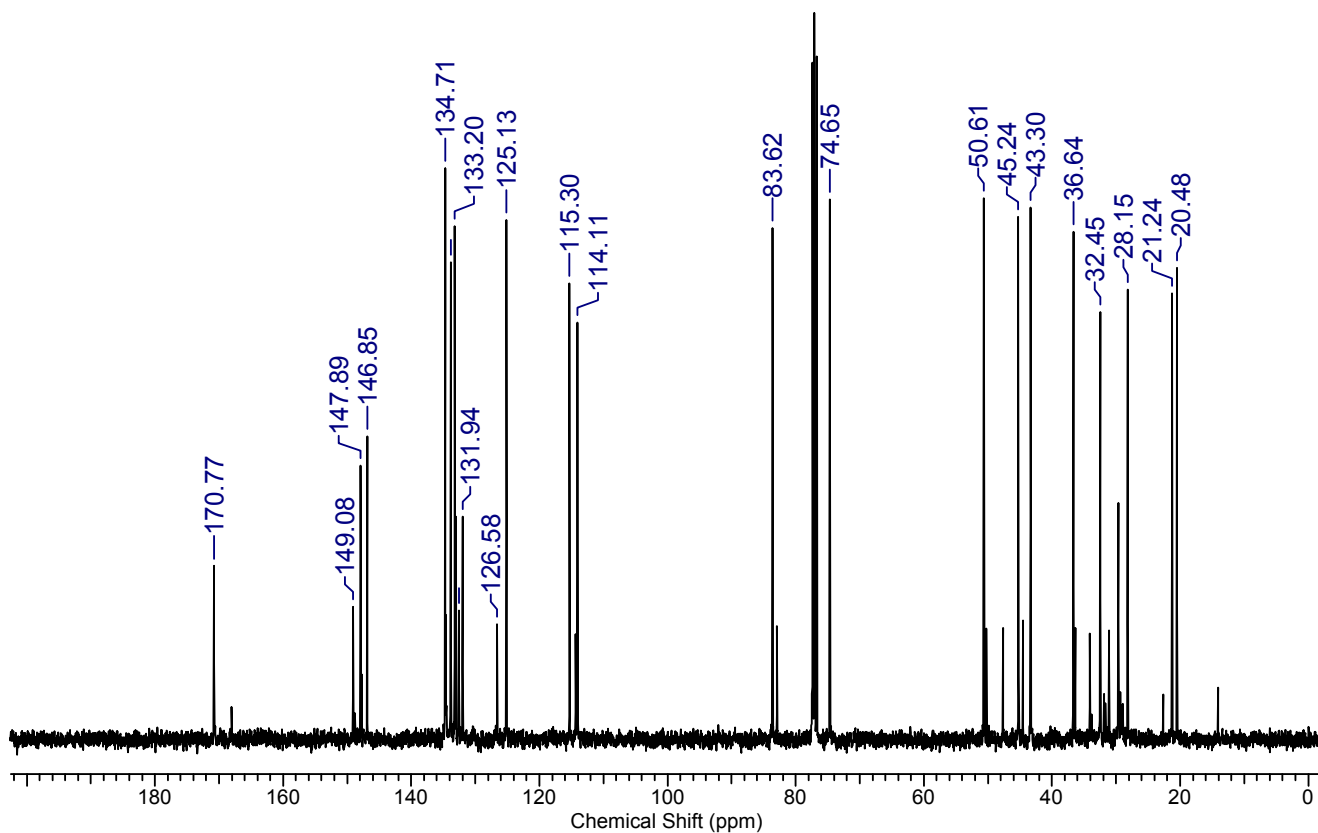

**DEPT of Compound 27 (100 MHz, CDCl<sub>3</sub>)**

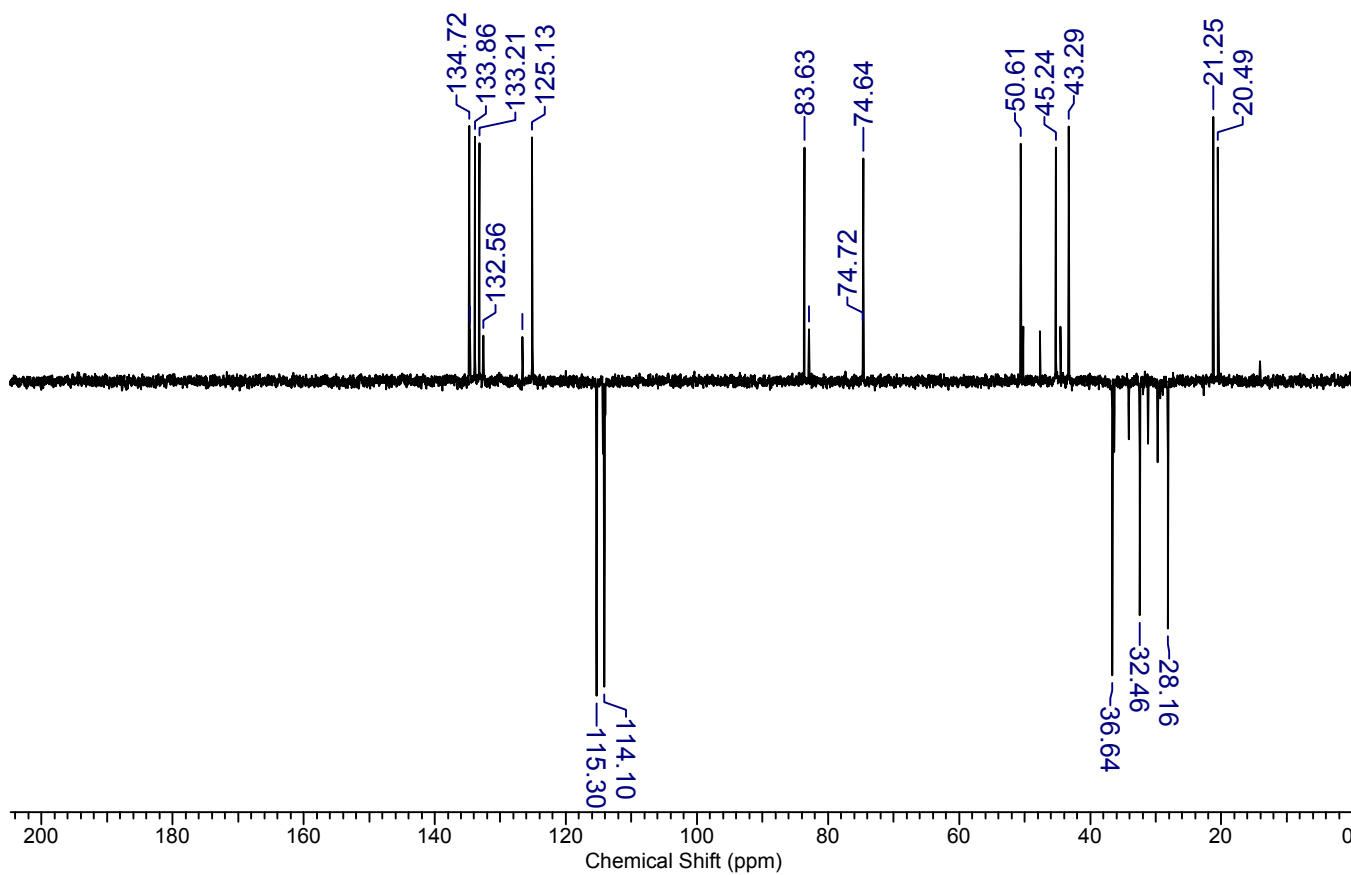

# HR-MS of Compound 27

D:\Data\IS-352-A

12/9/2014 12:36:52 PM

IS-352-A #1024 RT: 4.56 AV: 1 NL: 1.33E8

T: FTMS + p ESI Full ms [66.70-1000.00]

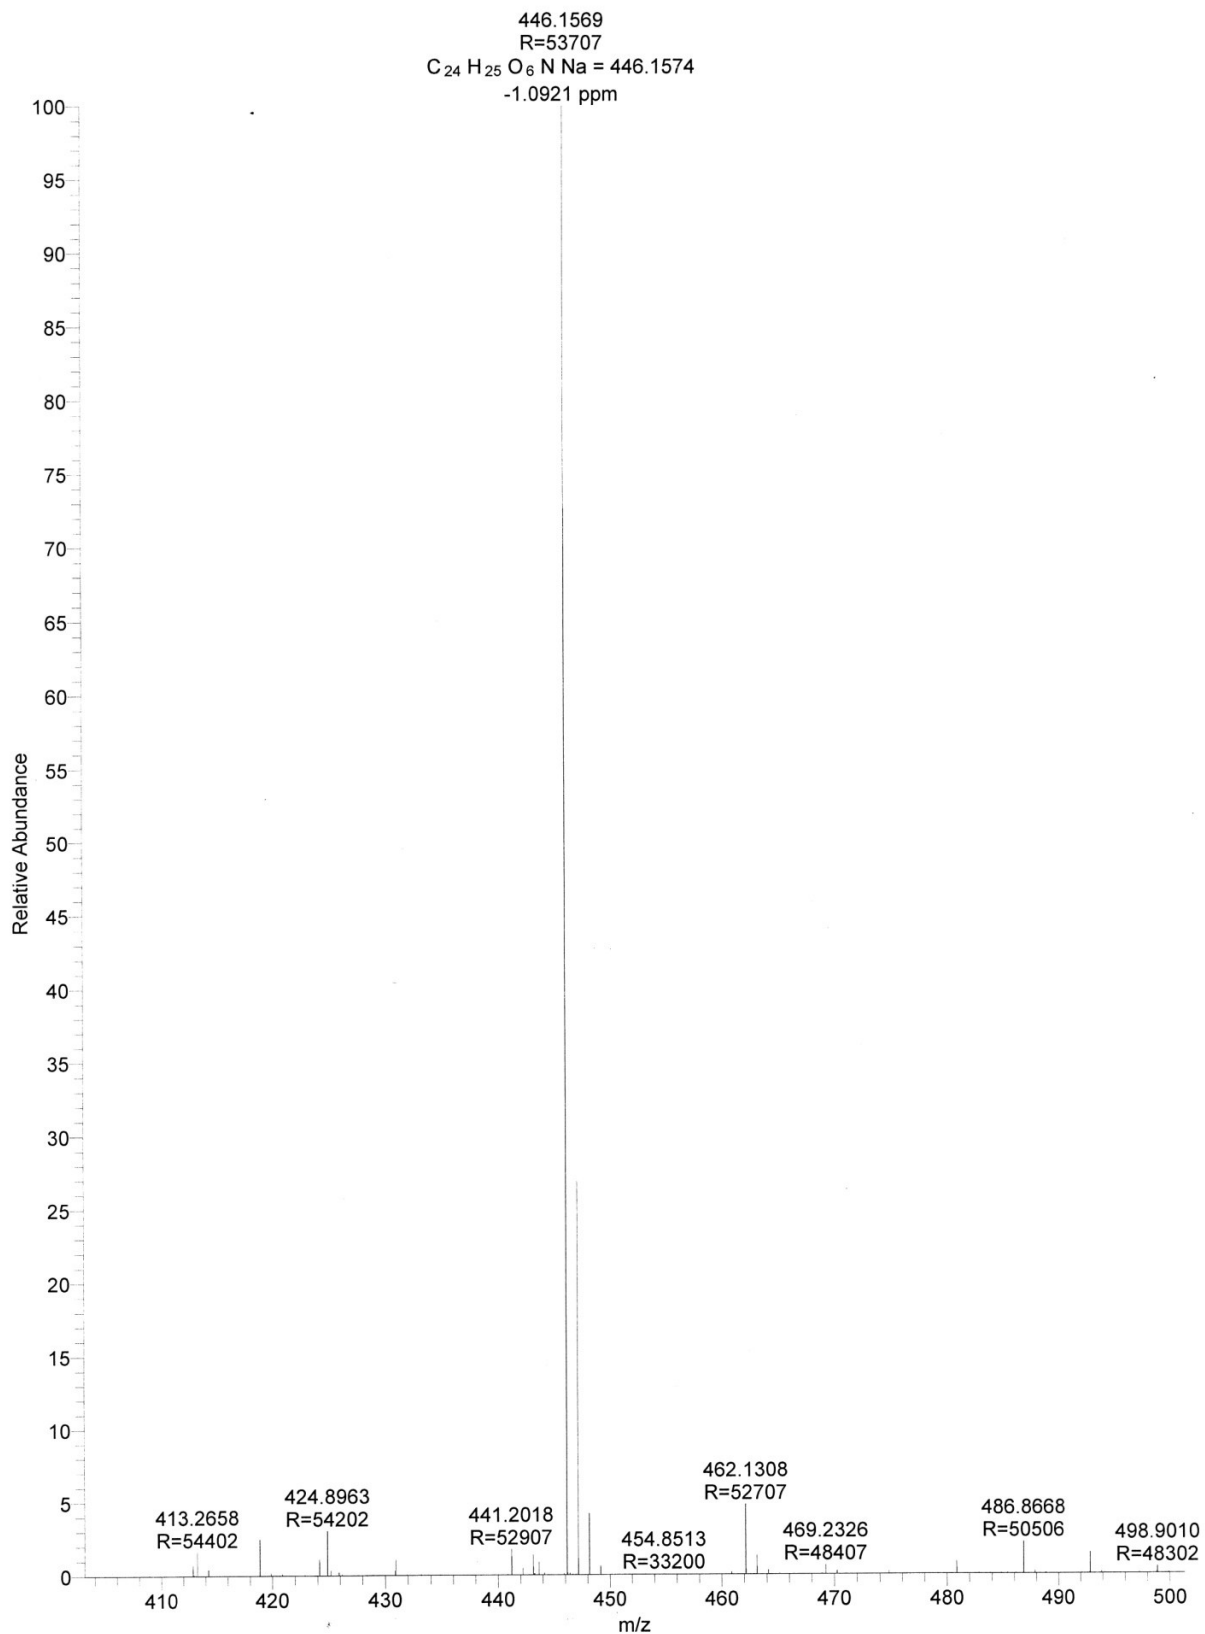

<sup>1</sup>H NMR of Compound 28 (500 MHz, CDCl<sub>3</sub>)

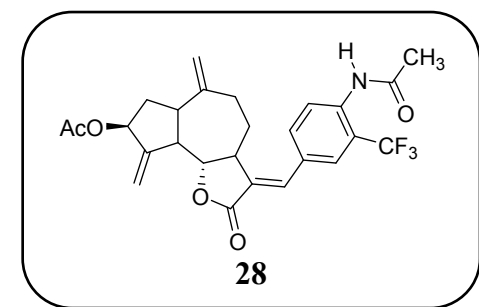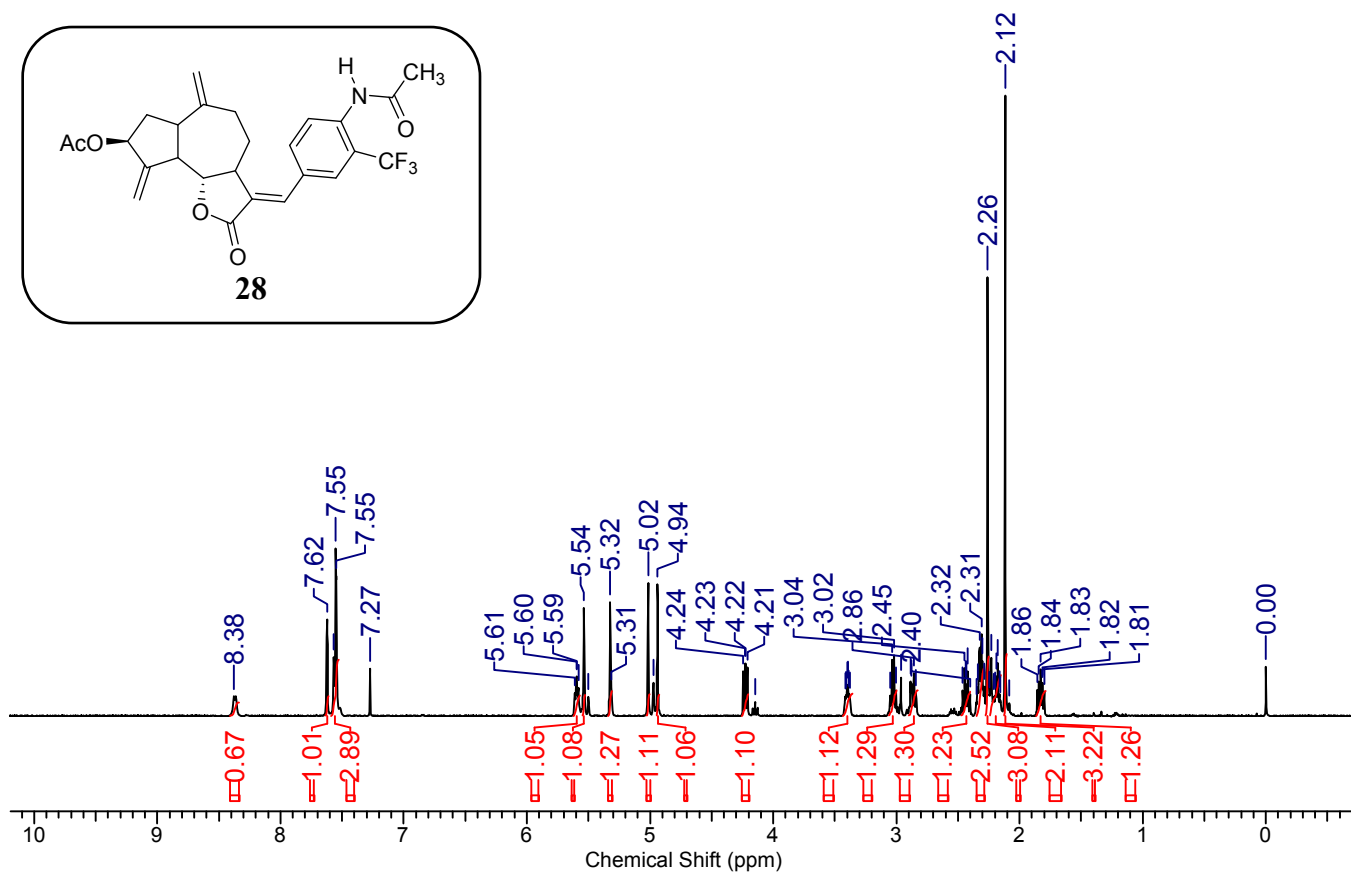

<sup>13</sup>C NMR of Compound 28 (125 MHz, CDCl<sub>3</sub>)

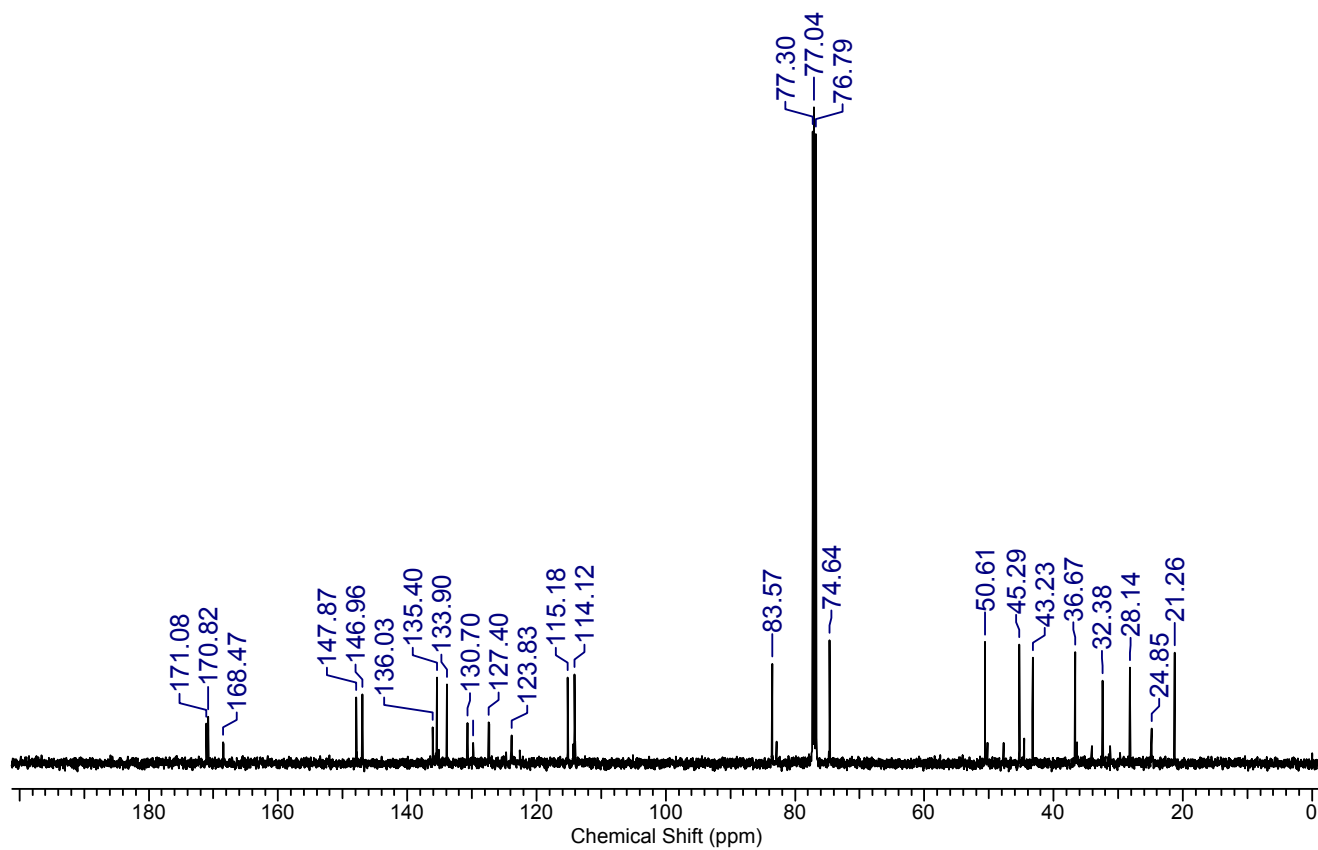

### DEPT of Compound 28 (125 MHz, CDCl<sub>3</sub>)

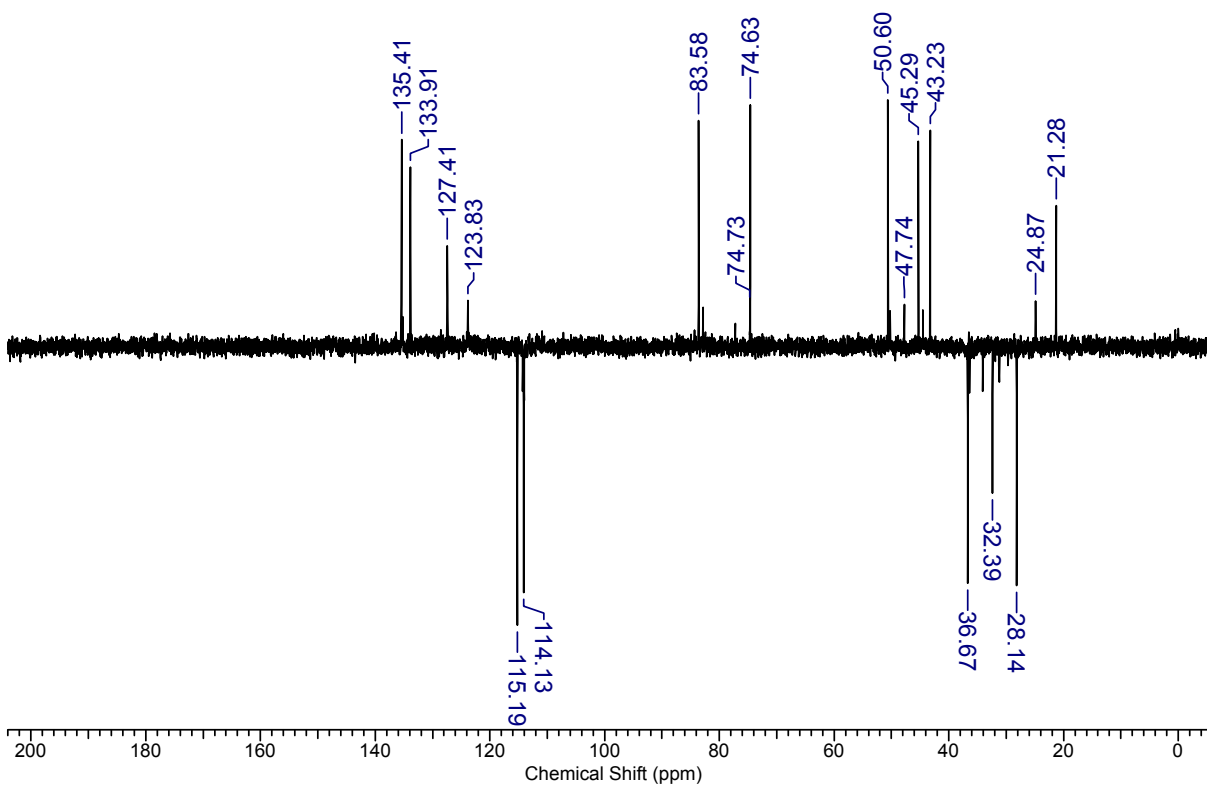

### HR-MS of Compound 28

D:\Data\IS-365

12/24/2014 12:41:53 PM

IS-365 #899 RT: 4.00 AV: 1 NL: 8.84E7  
T: FTMS + p ESI Full ms [66.70-1000.00]

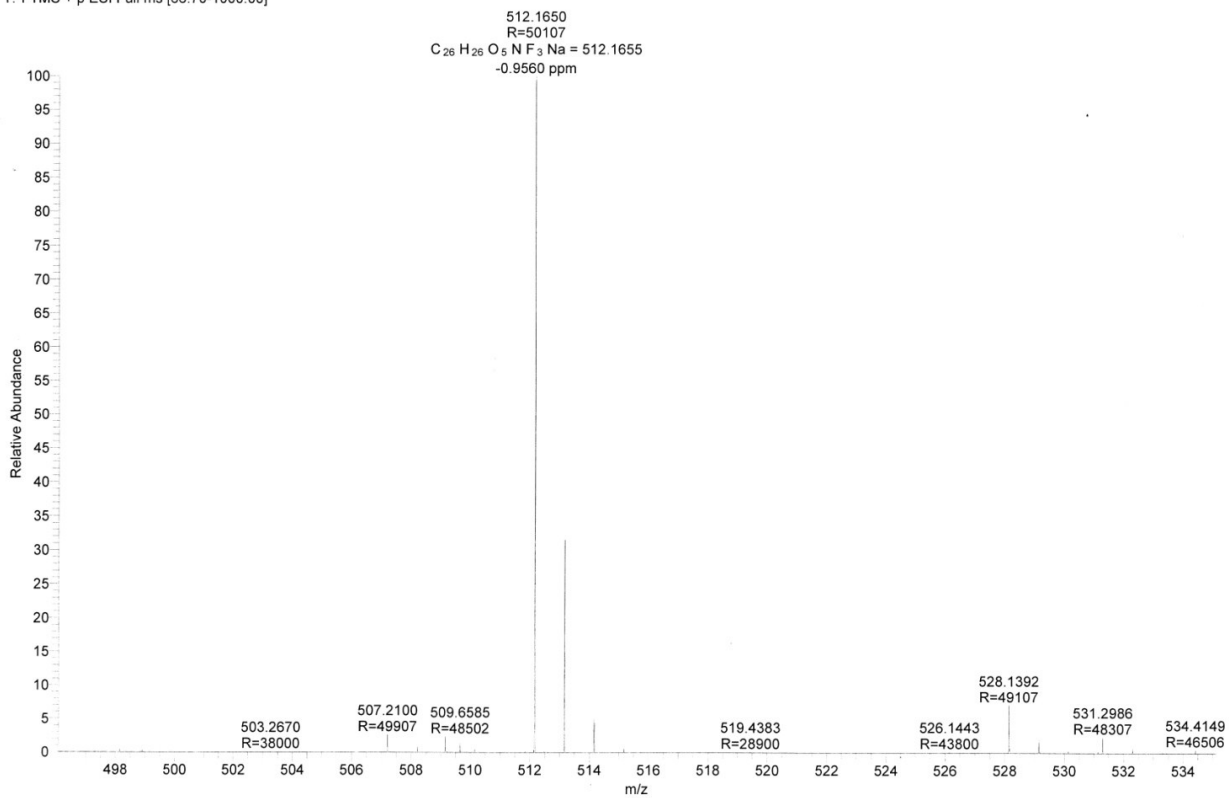

**<sup>1</sup>H NMR of Compound 29 (500 MHz, CDCl<sub>3</sub>)**

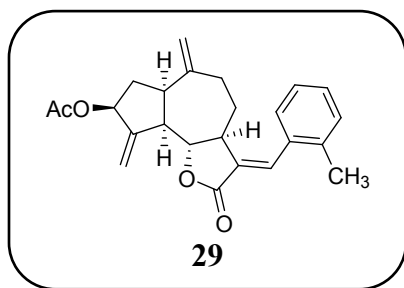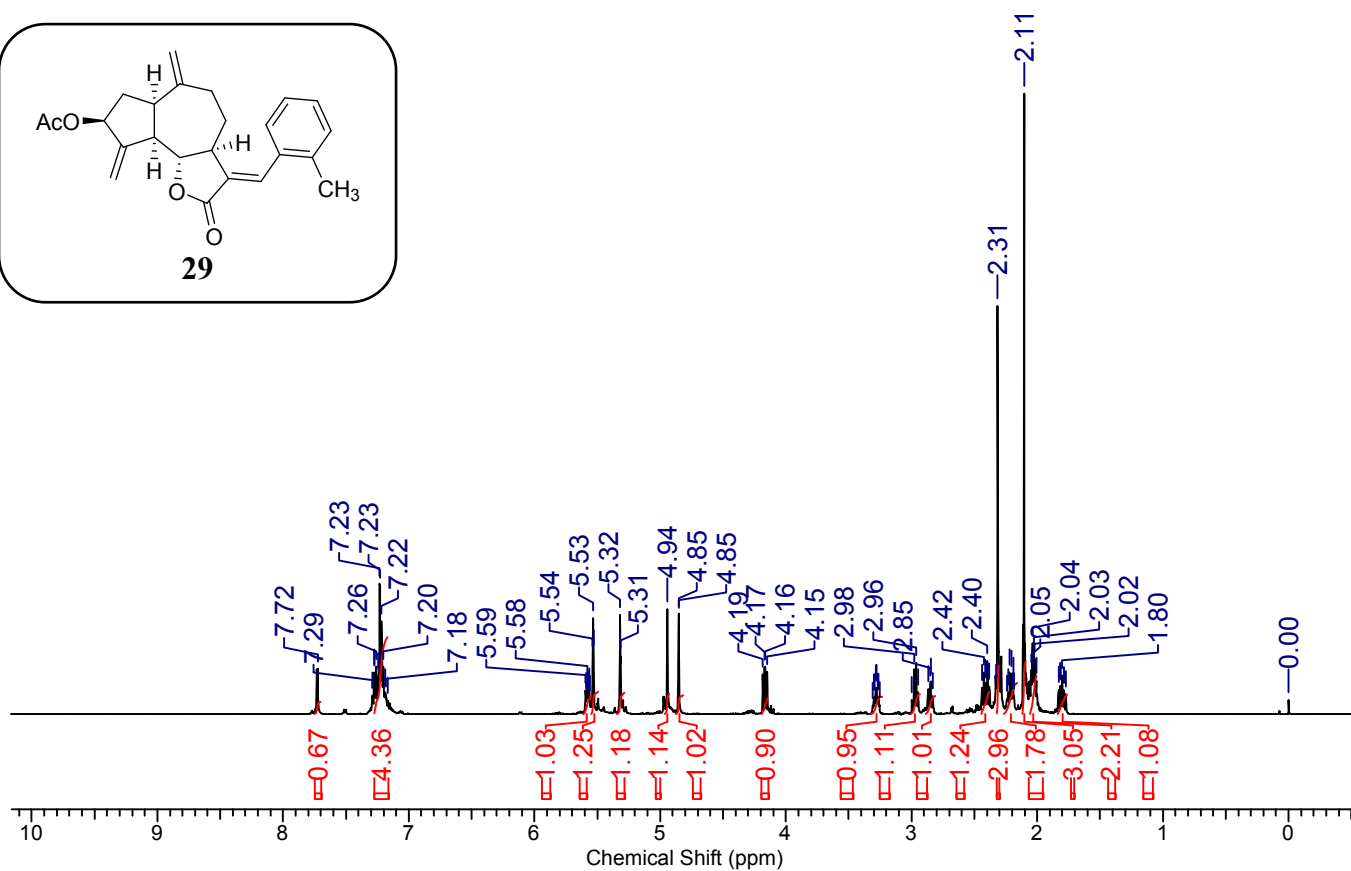

**<sup>13</sup>C NMR of Compound 29 (125 MHz, CDCl<sub>3</sub>)**

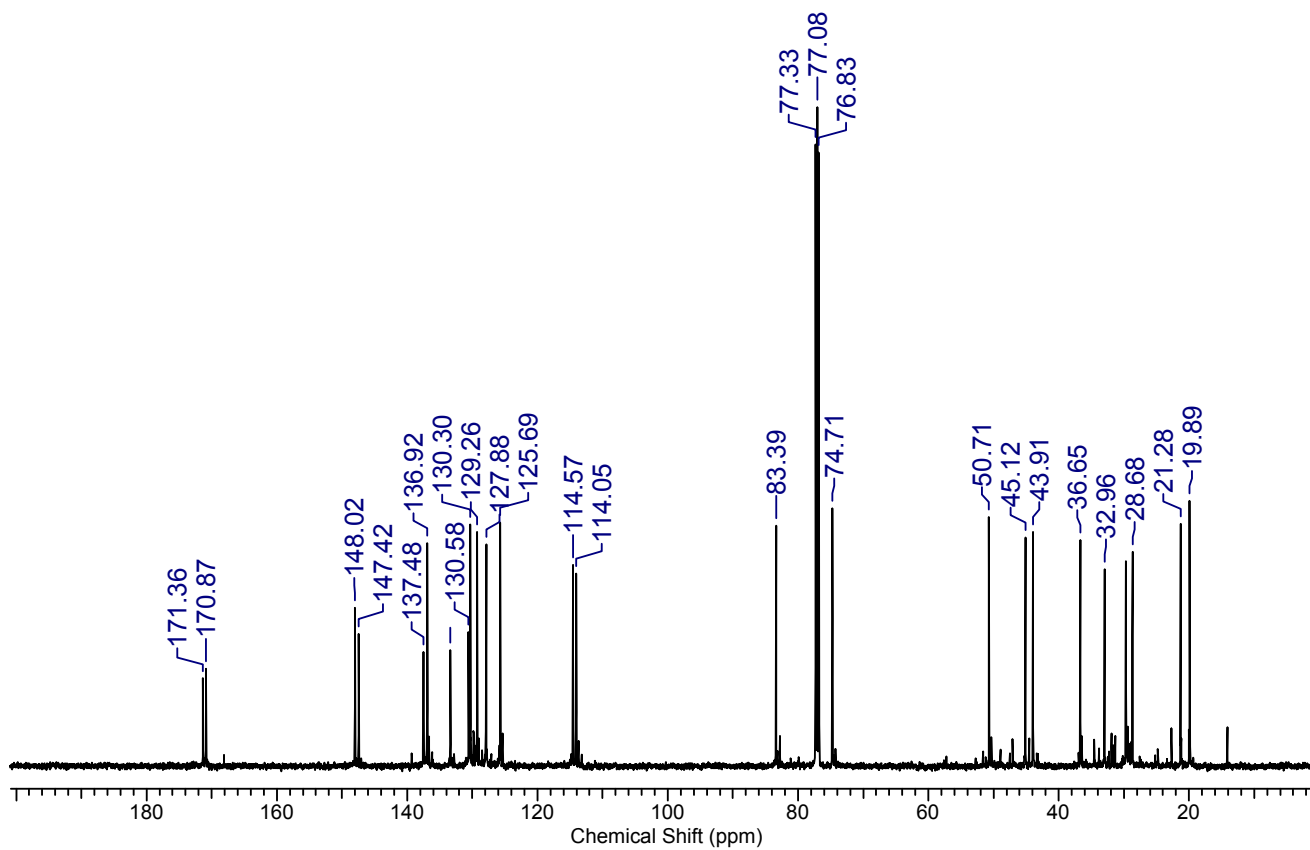

DEPT of Compound 29 (125 MHz, CDCl<sub>3</sub>)

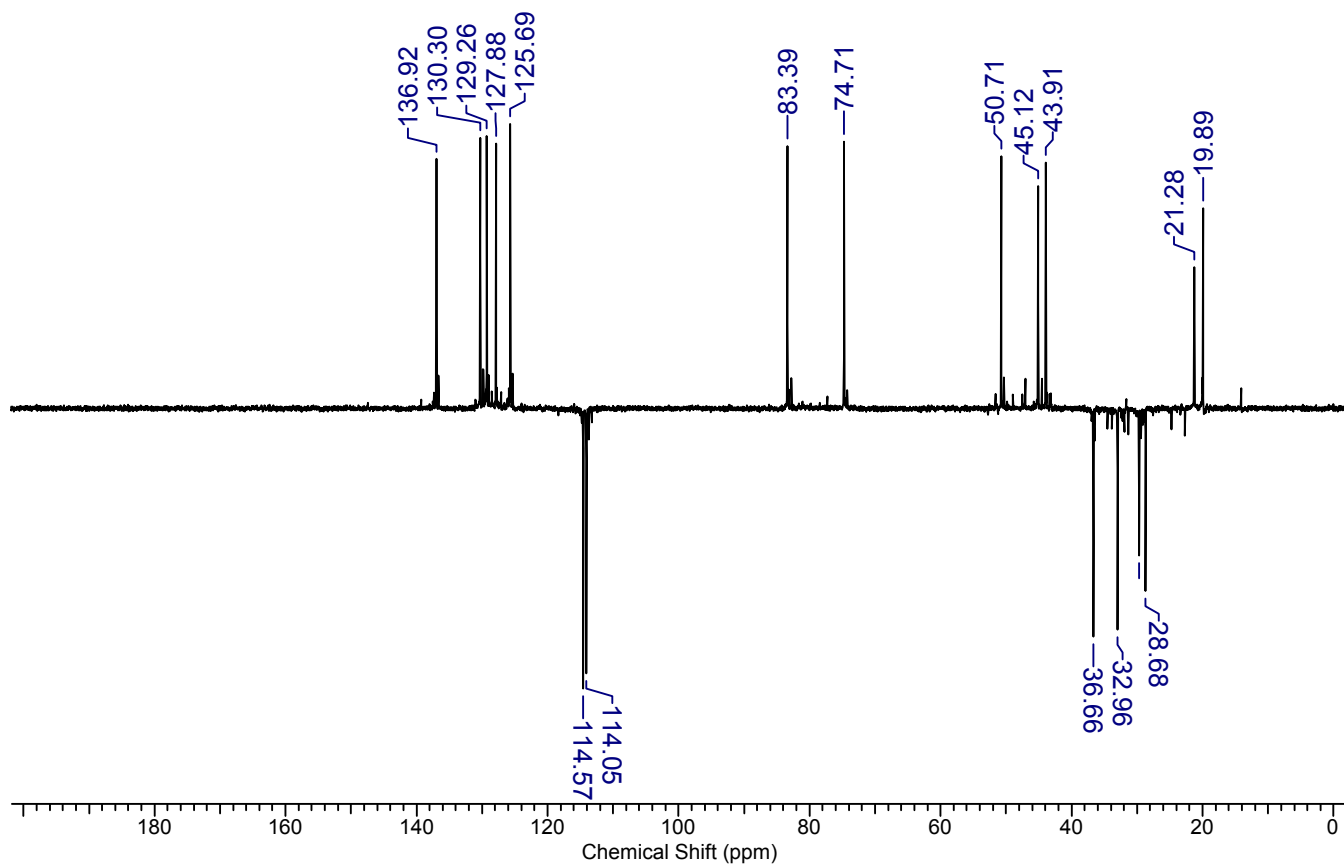

# HR-MS of Compound 29

D:\Data\IS-366

12/9/2014 12:47:59 PM

IS-366 #1092 RT: 4.86 AV: 1 NL: 1.47E8  
T: FTMS + p ESI Full ms [66.70-1000.00]

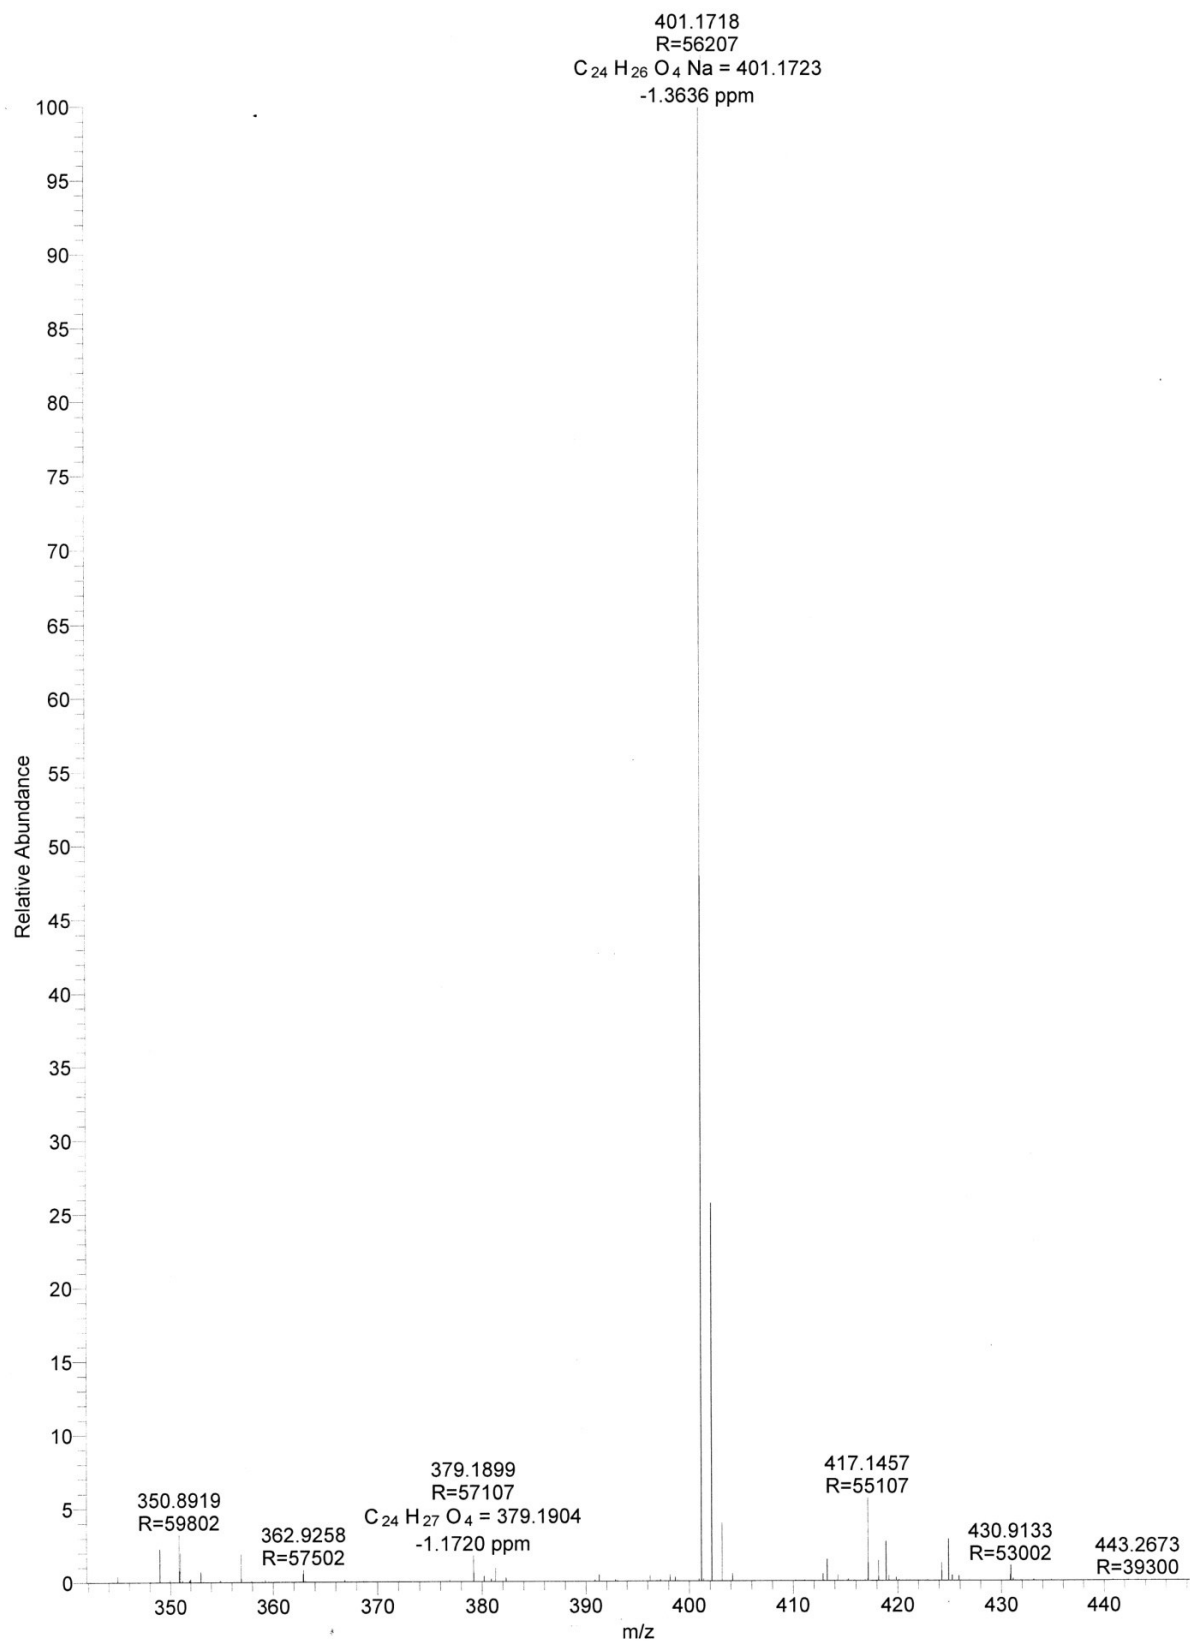



**<sup>1</sup>H NMR of Compound 30 (400 MHz, CDCl<sub>3</sub>)**

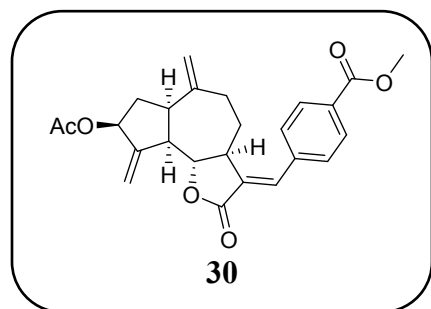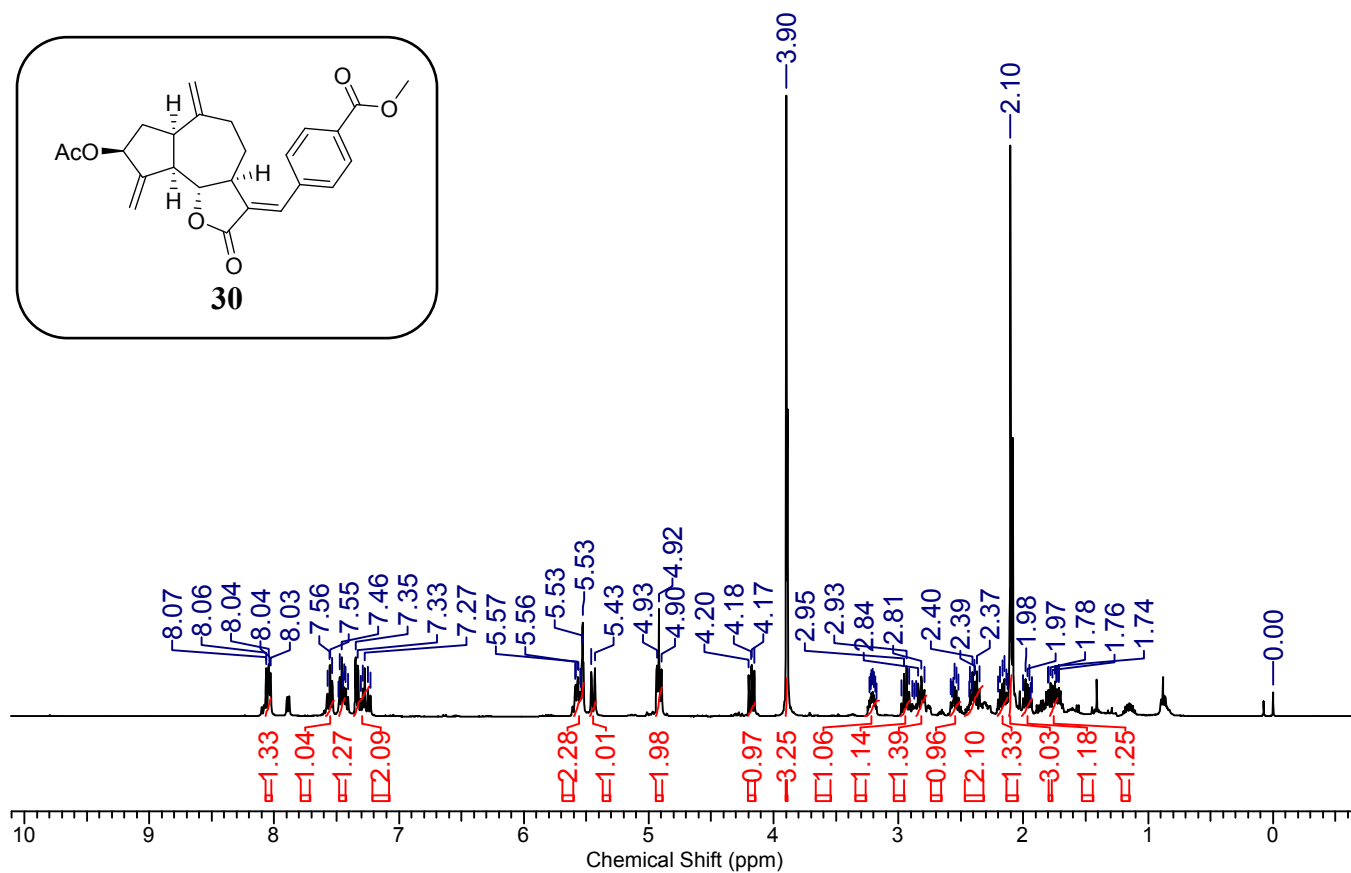

**<sup>13</sup>C NMR of Compound 30 (100 MHz, CDCl<sub>3</sub>)**

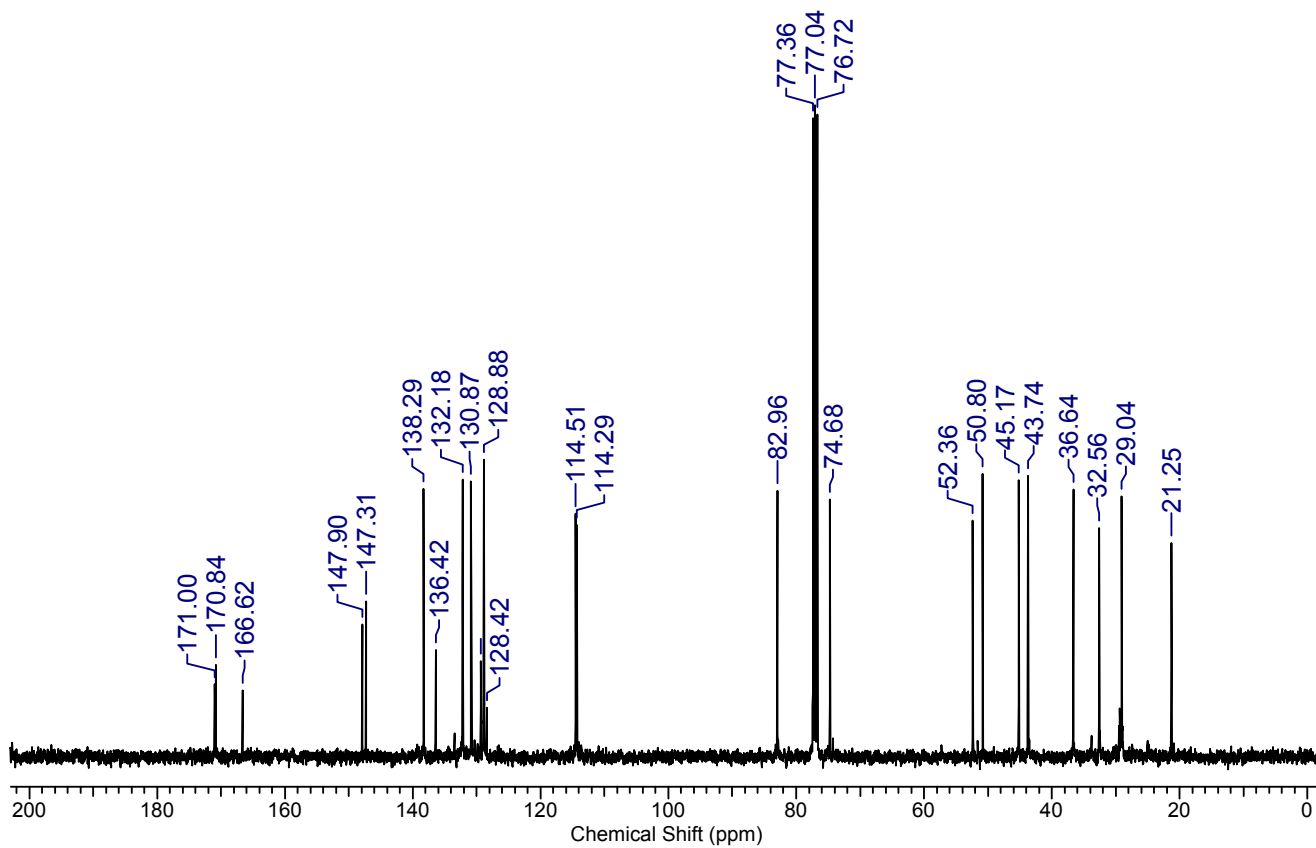

# HR-MS of Compound 30

D:\Data\IS-367

12/9/2014 12:59:13 PM

IS-367 #987 RT: 4.40 AV: 1 NL: 2.95E8  
T: FTMS + p ESI Full ms [66.70-1000.00]

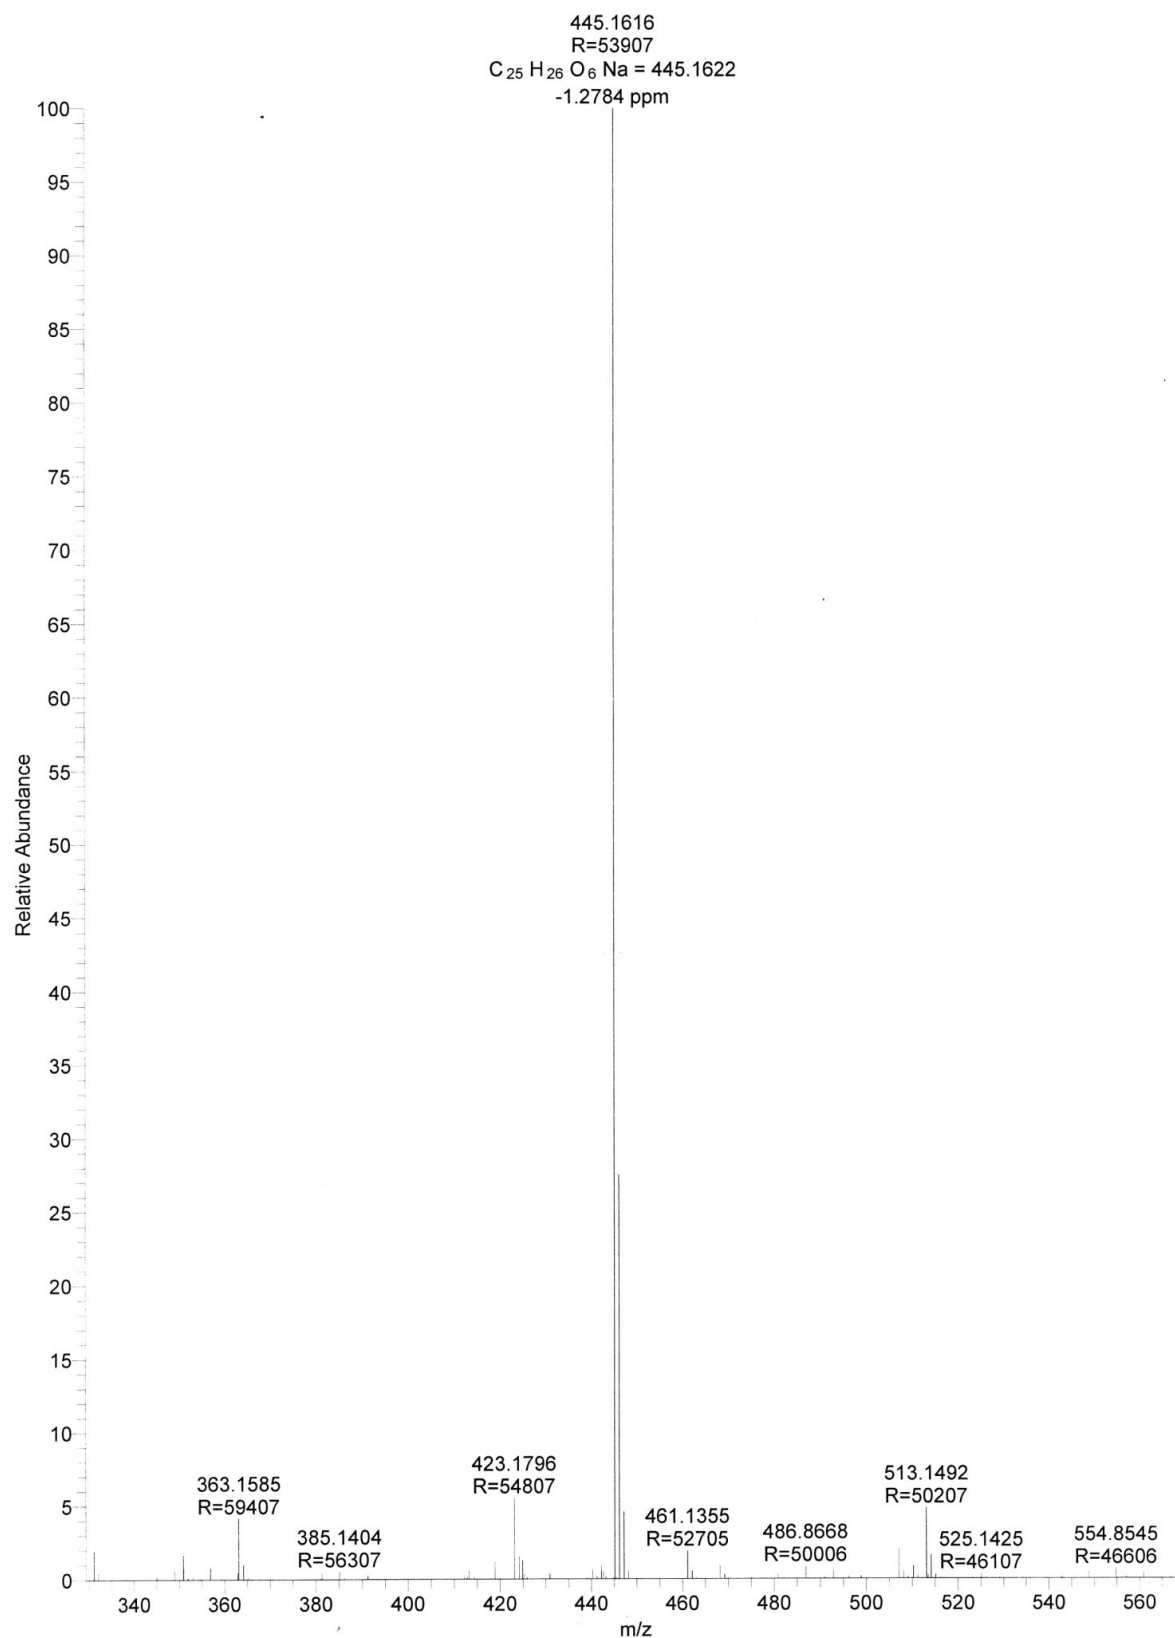

**<sup>1</sup>H NMR of Compound 31 (400 MHz, CDCl<sub>3</sub>)**

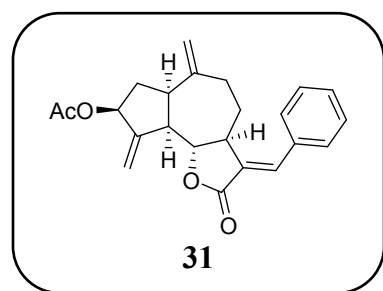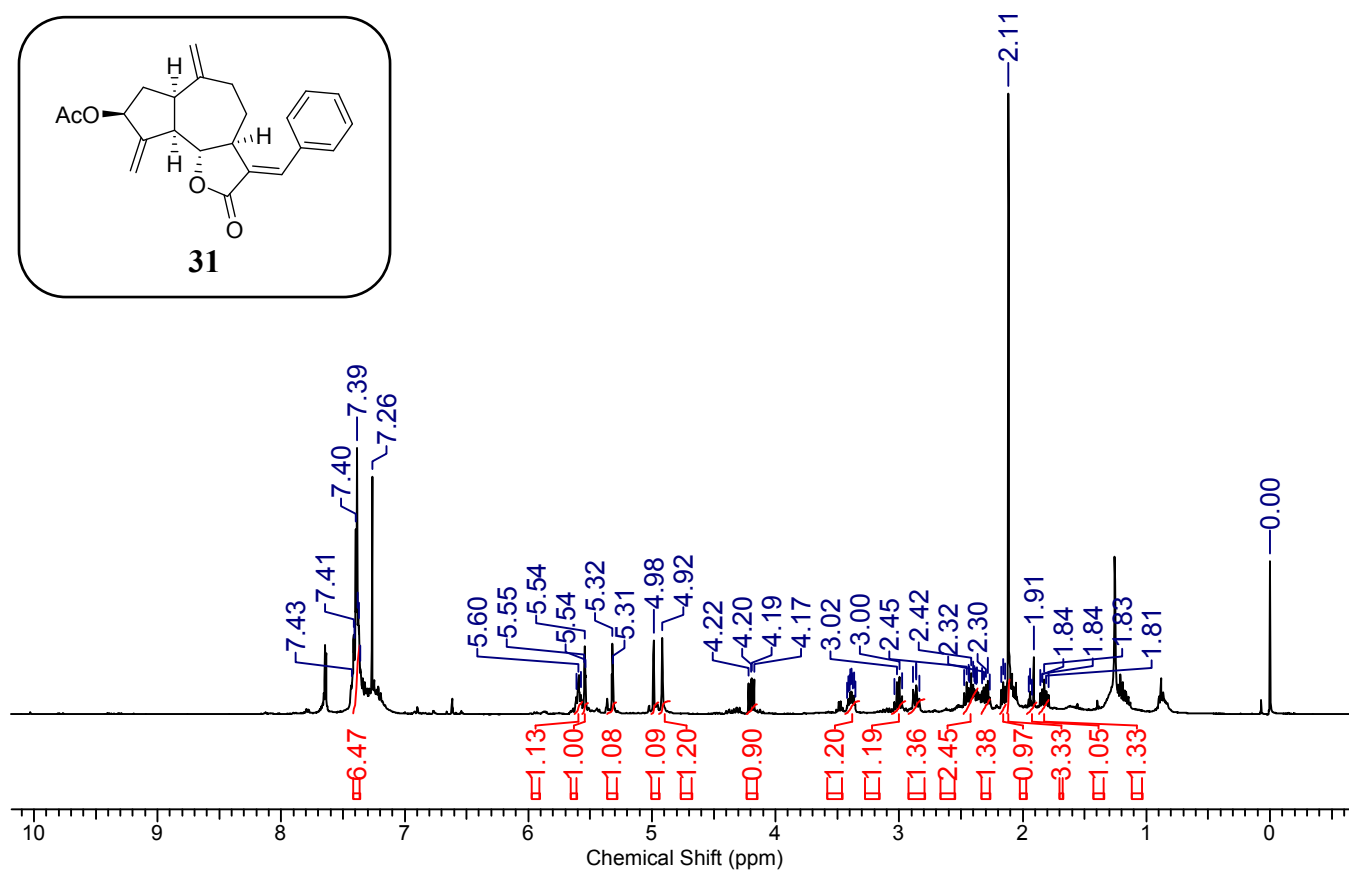

**<sup>13</sup>C NMR of Compound 31 (100 MHz, CDCl<sub>3</sub>)**

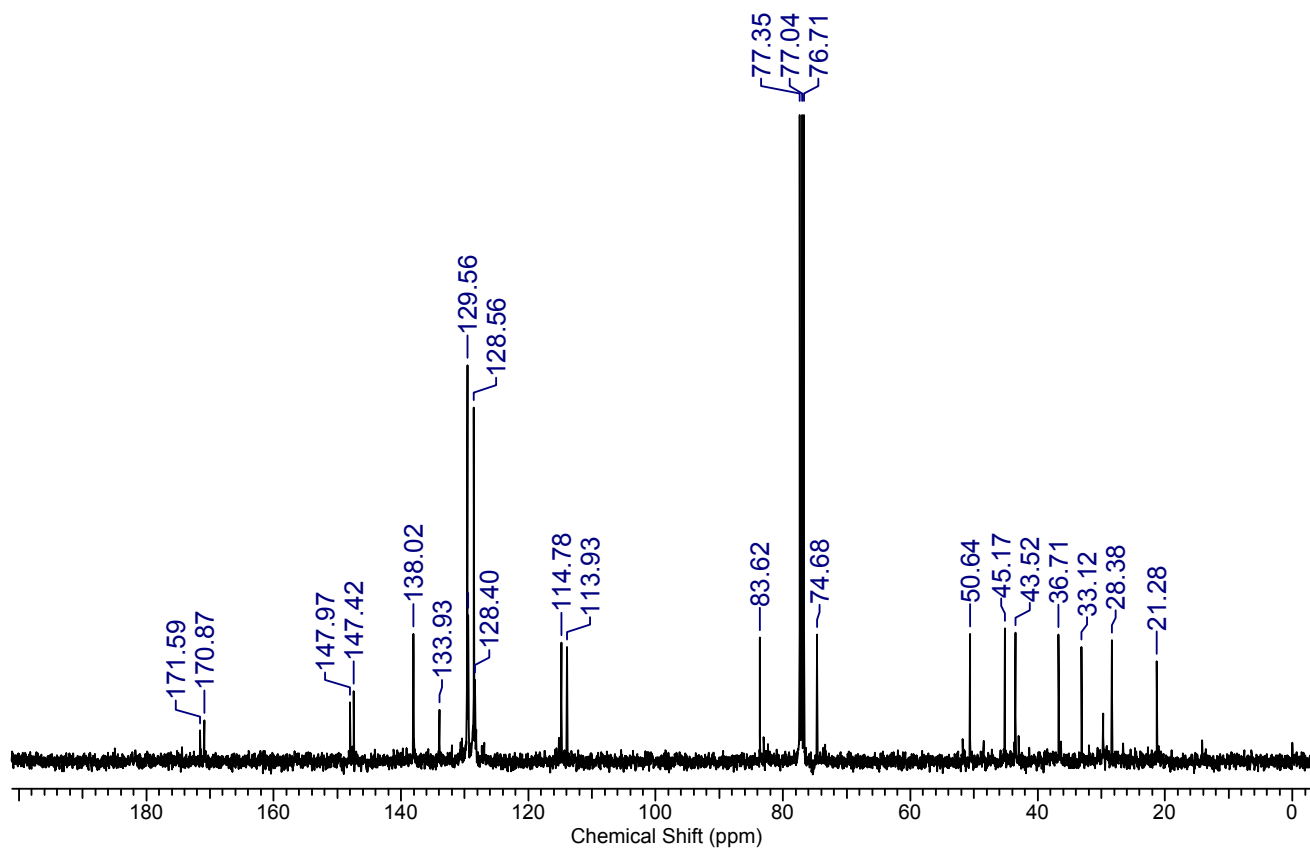

### DEPT of Compound 31 (100 MHz, CDCl<sub>3</sub>)

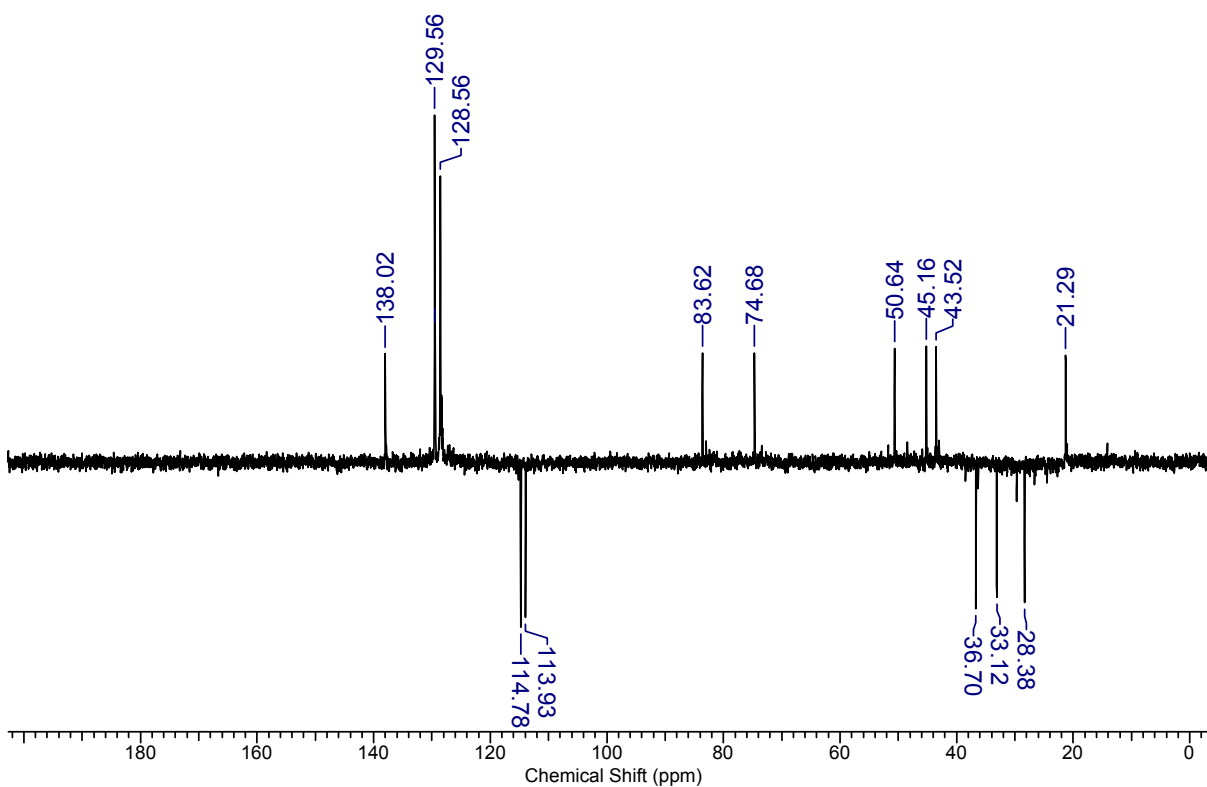

### HR-MS of Compound 31

D:\Data\IS-369-B

12/24/2014 12:53:01 PM

IS-369-B #1052 RT: 4.69 AV: 1 NL: 2.88E7  
T: FTMS + p ESI Full ms [66.70-1000.00]

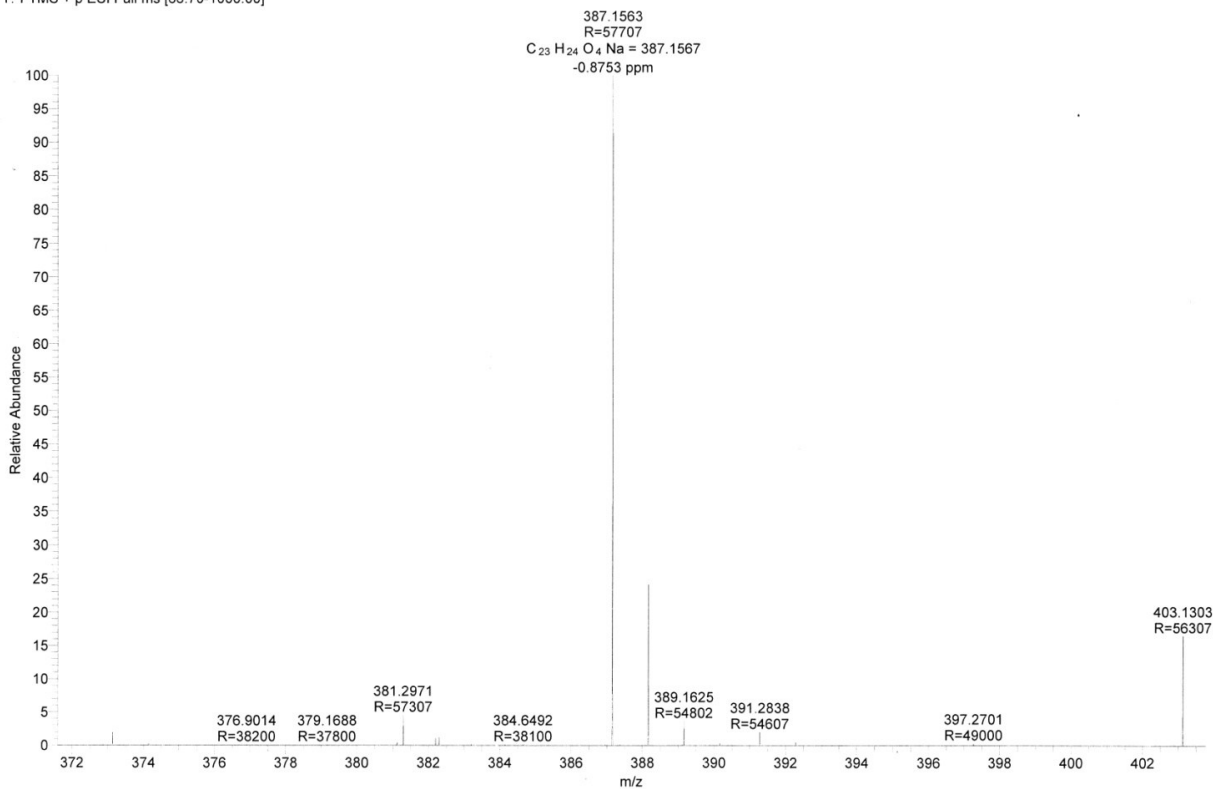

**<sup>1</sup>H NMR of Compound 32 (400 MHz, CDCl<sub>3</sub>)**

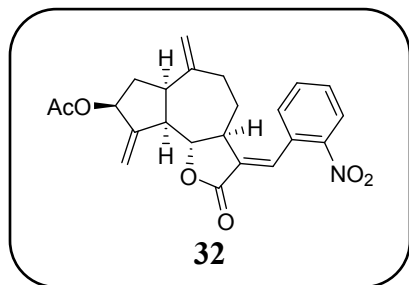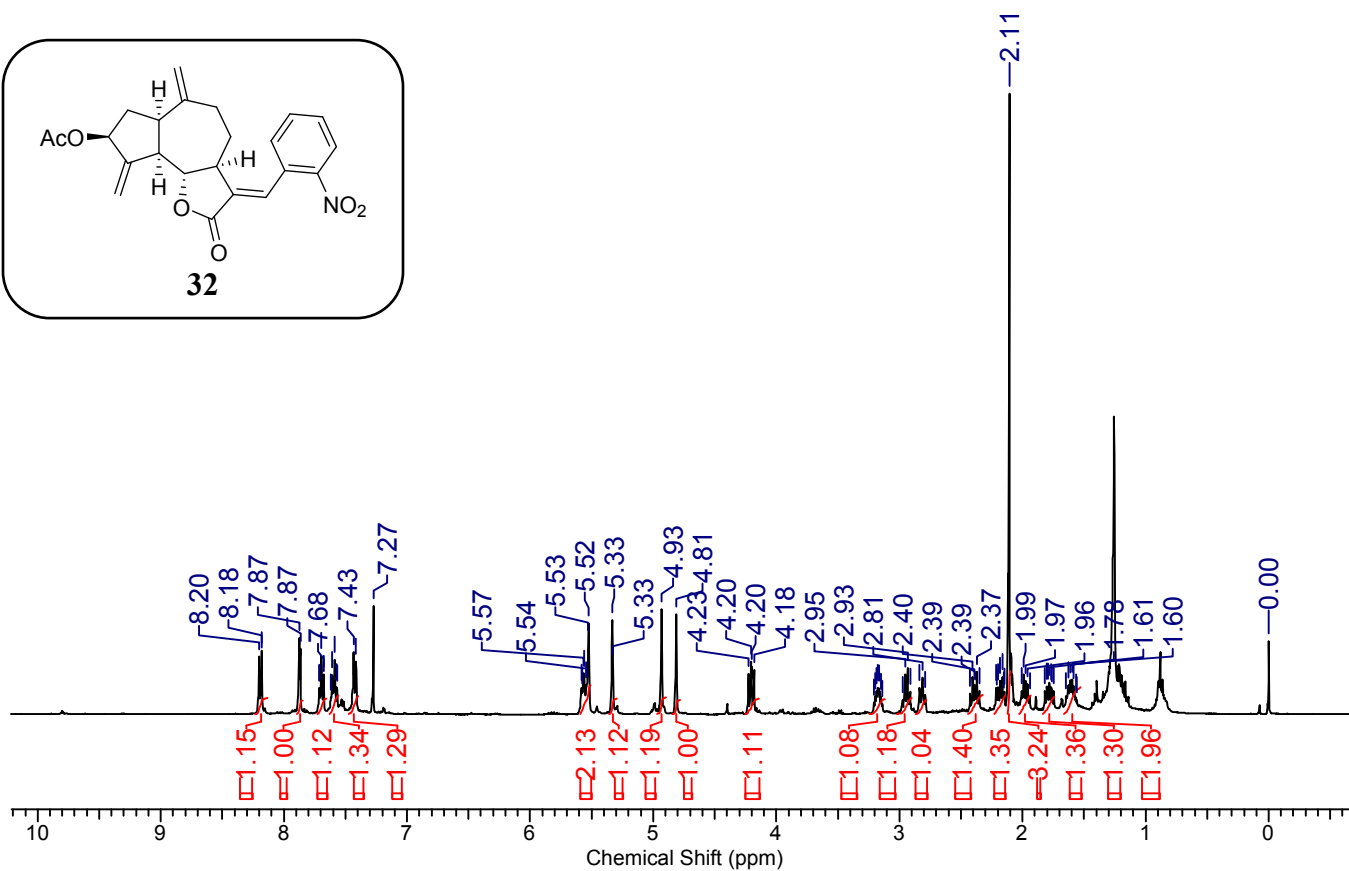

**<sup>13</sup>C NMR of Compound 32 (100 MHz, CDCl<sub>3</sub>)**

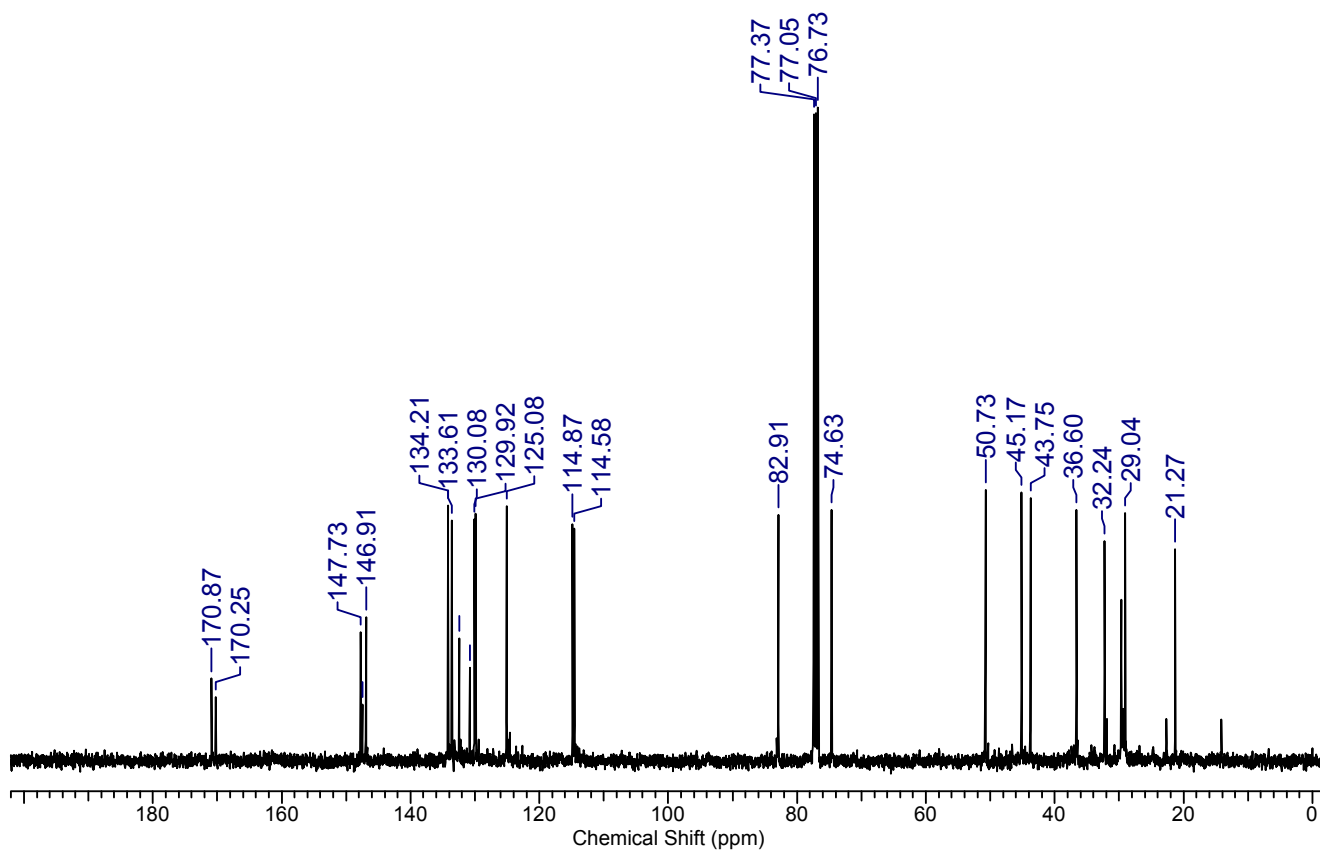

### DEPT of Compound 32 (100 MHz, CDCl<sub>3</sub>)

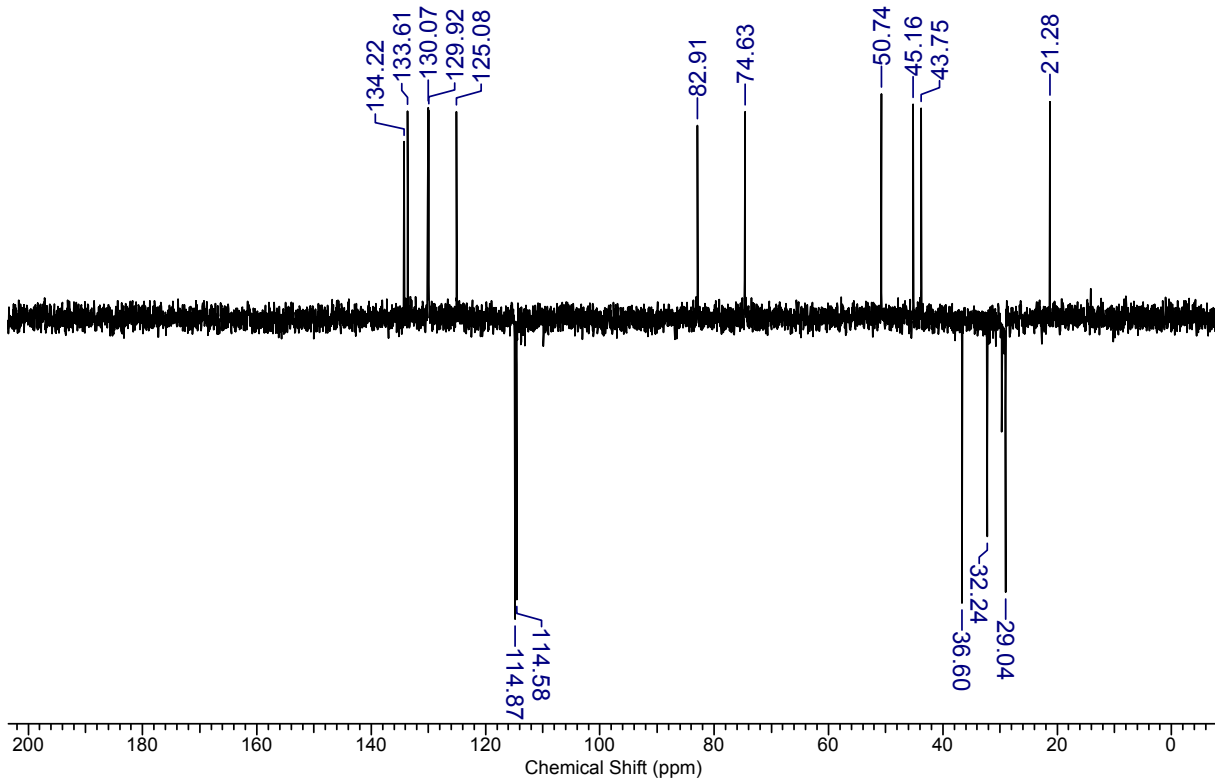

### HR-MS of Compound 32

D:\Data\IS-370-C

12/24/2014 1:04:10 PM

IS-370-C #977 RT: 4.35 AV: 1 NL: 3.18E7  
T: FTMS + p ESI Full ms [66.70-1000.00]

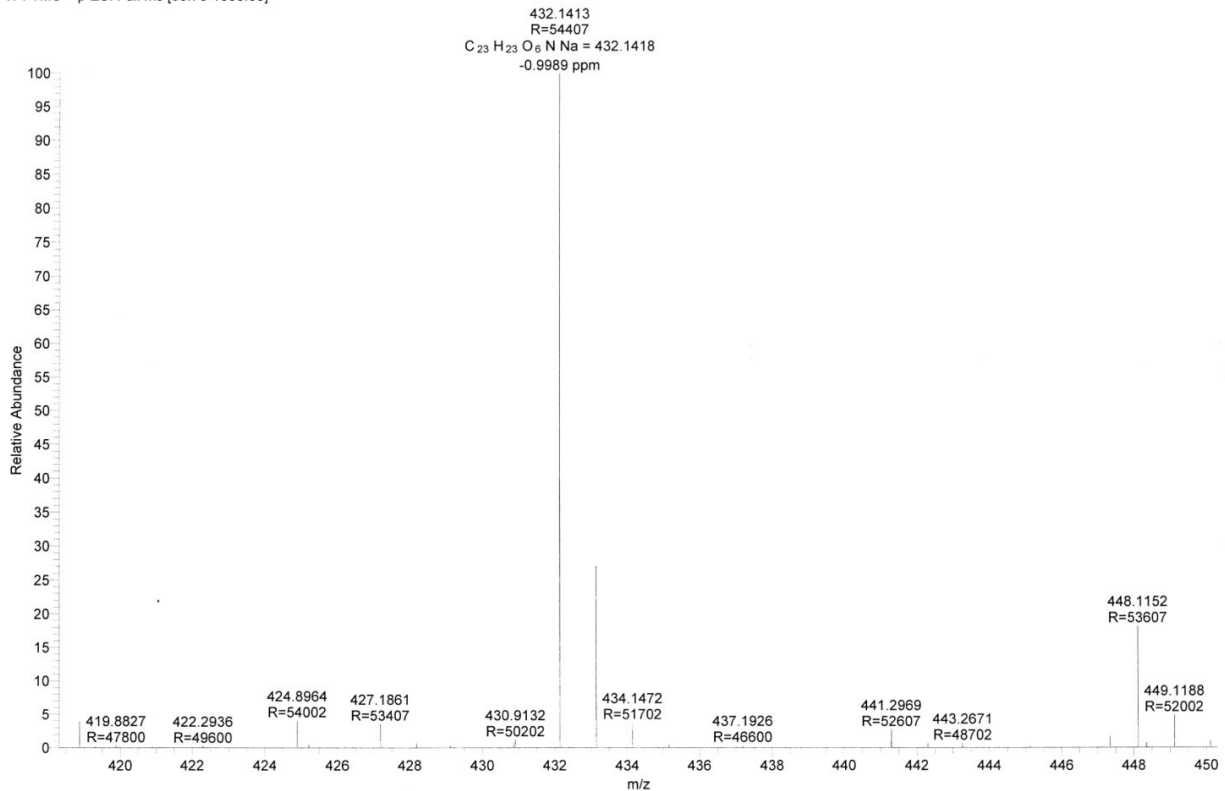

**<sup>1</sup>H NMR of Compound 33 (500 MHz, CDCl<sub>3</sub>)**

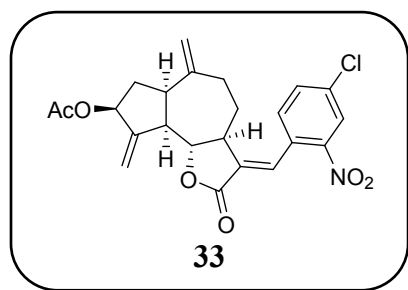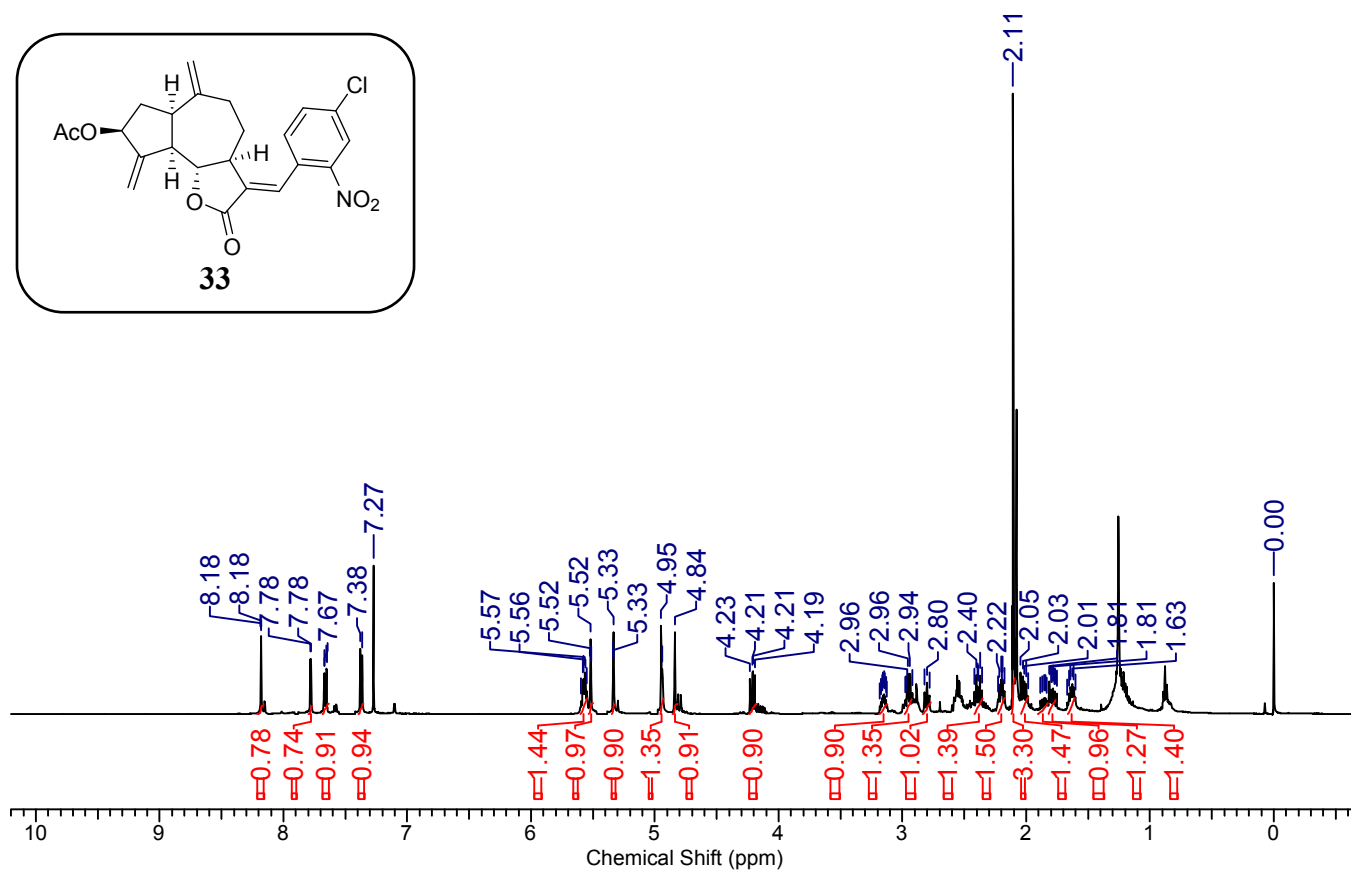

**<sup>13</sup>C NMR of Compound 33 (125 MHz, CDCl<sub>3</sub>)**

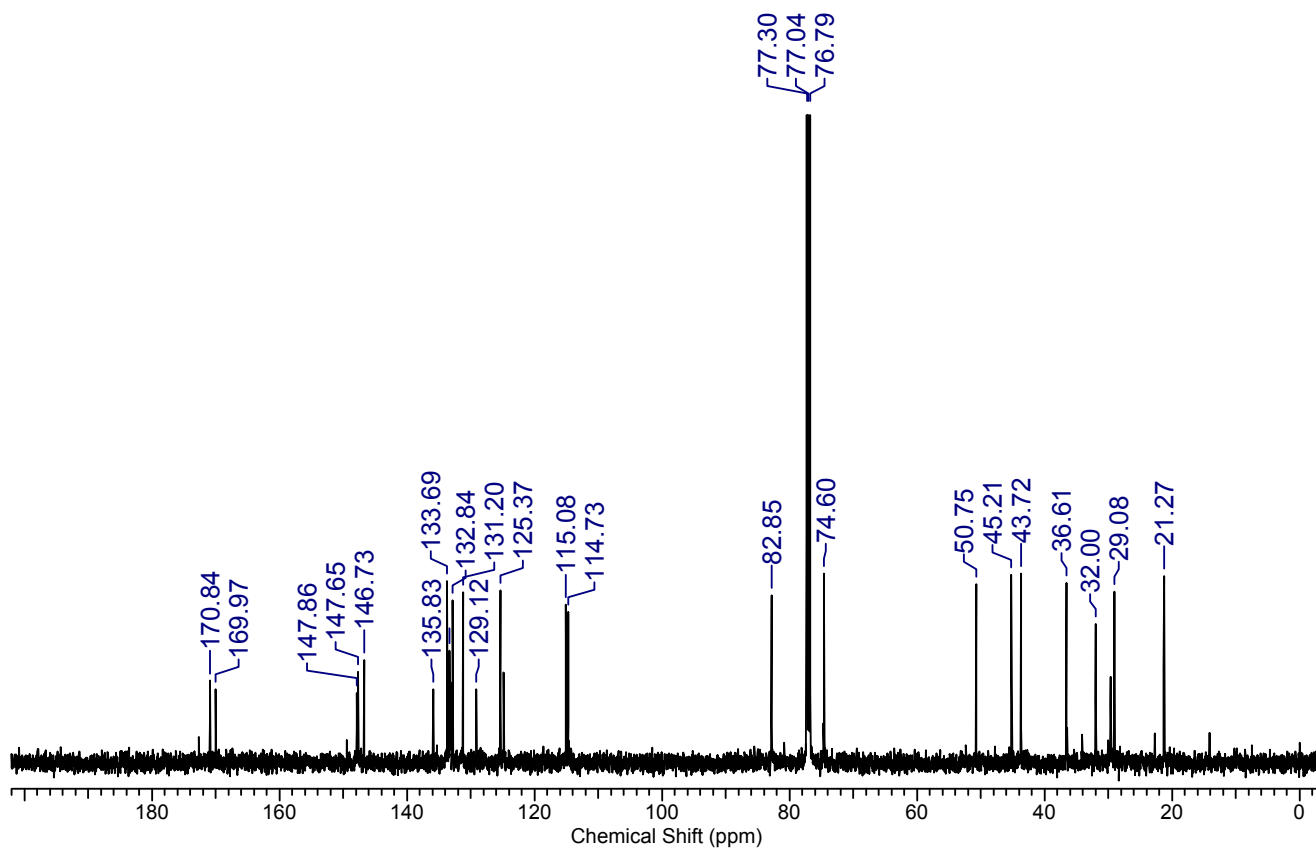

# HR-MS of Compound 33

D:\Data\IS-371-B

12/24/2014 1:15:23 PM

IS-371-B #1046 RT: 4.66 AV: 1 NL: 7.62E7  
T: FTMS + p ESI Full ms [66.70-1000.00]

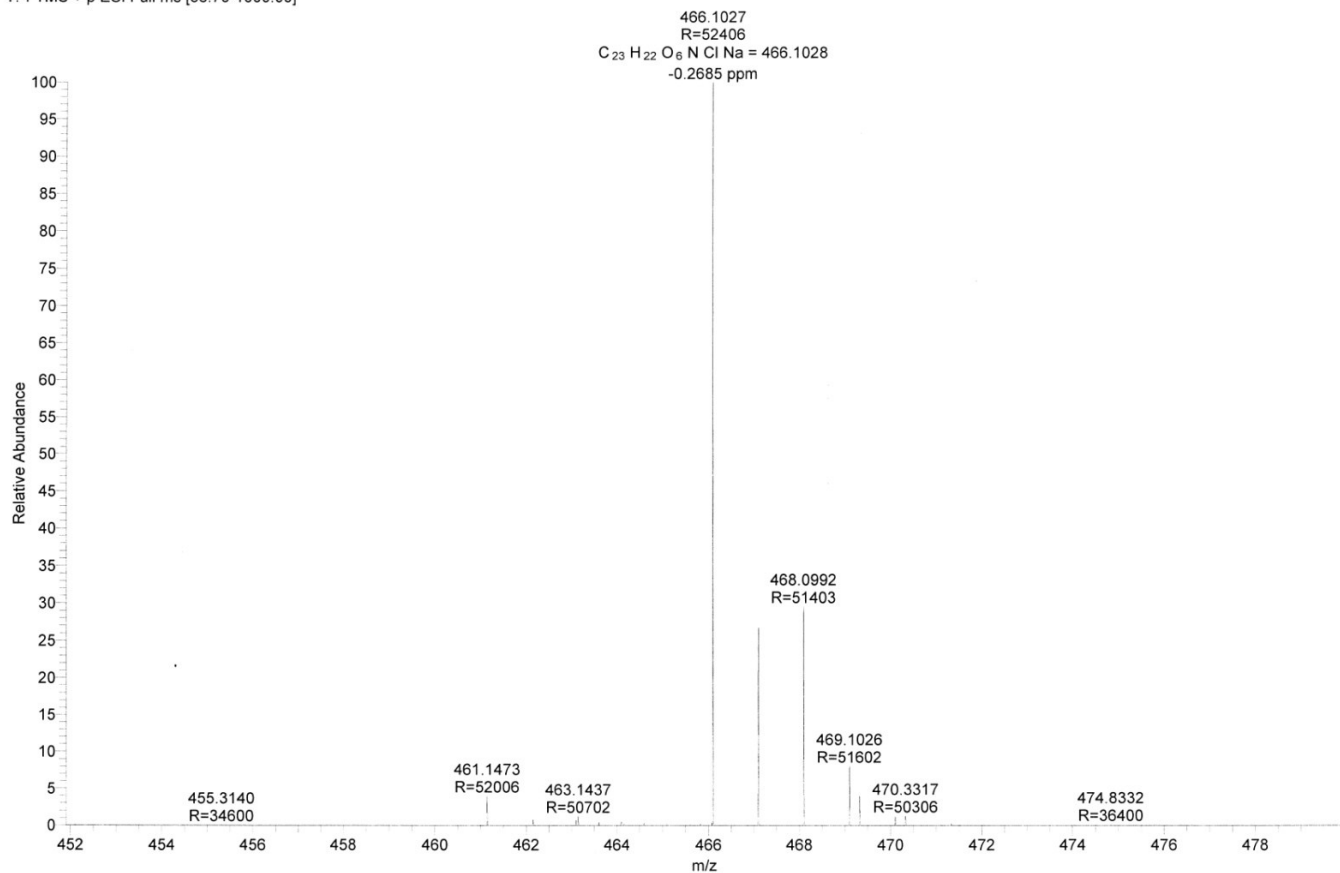



**<sup>1</sup>H NMR of Compound 34 (400 MHz, CDCl<sub>3</sub>)**

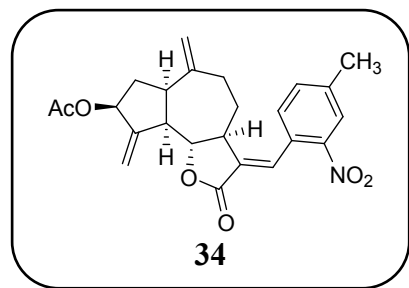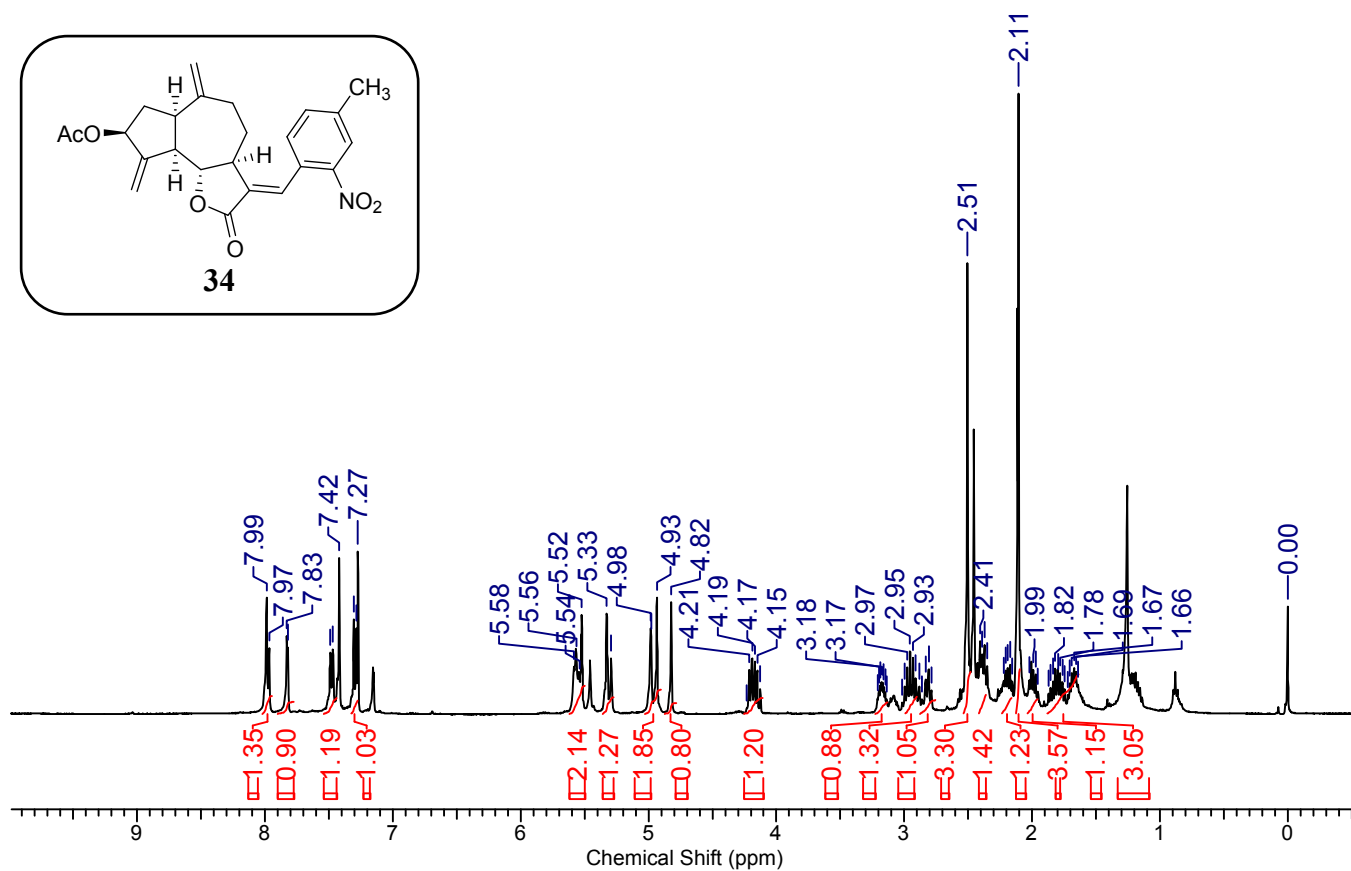

**<sup>13</sup>C NMR of Compound 34 (100 MHz, CDCl<sub>3</sub>)**

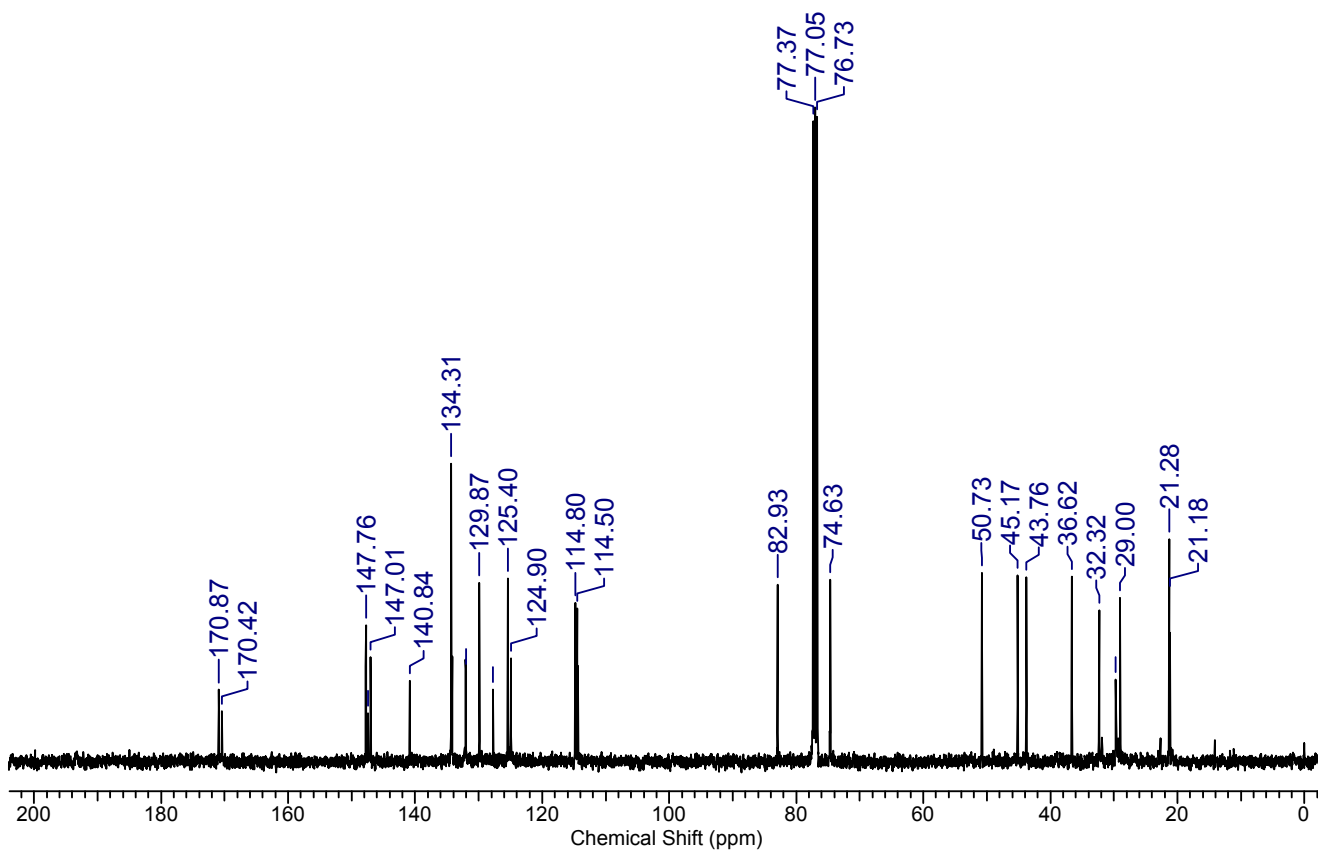

# HR-MS of Compound 34

D:\Data\IS-372-C

12/24/2014 1:37:44 PM

IS-372-C #1011 RT: 4.51 AV: 1 NL: 5.00E7  
T: FTMS + p ESI Full ms [66.70-1000.00]

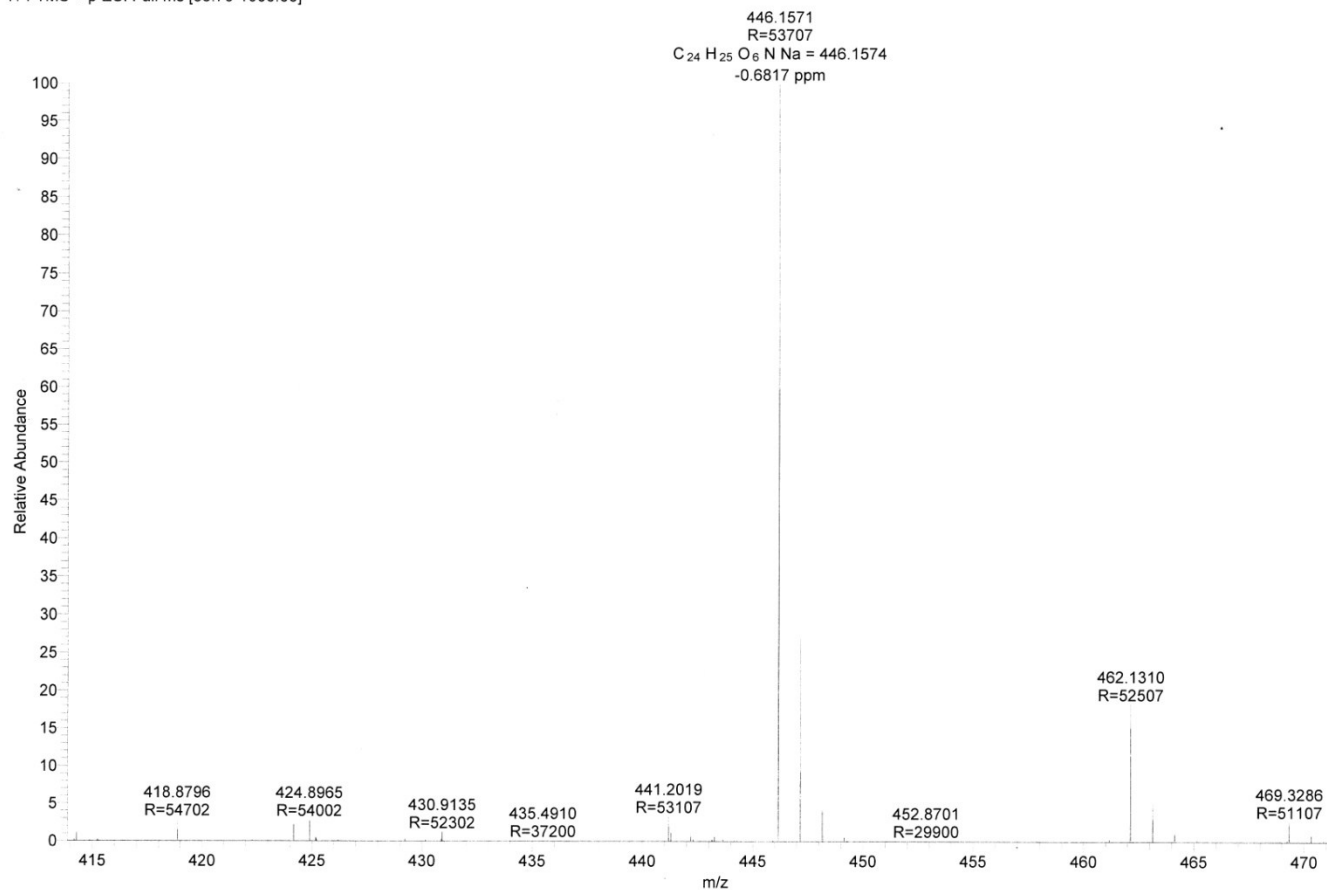

Supplement: c8ra06238b1.pdf [file c8ra06238b1.pdf]
